# Supplementary material for: Genome-wide Fitness Profiles Reveal a Requirement for Autophagy During Yeast Fermentation
Source: Oxford University Press journal article supplement (doi:10.1534/g3.111.000836), 2011-10-01
Supplement: 353_figures1.pdf [file 353_figures1.pdf]

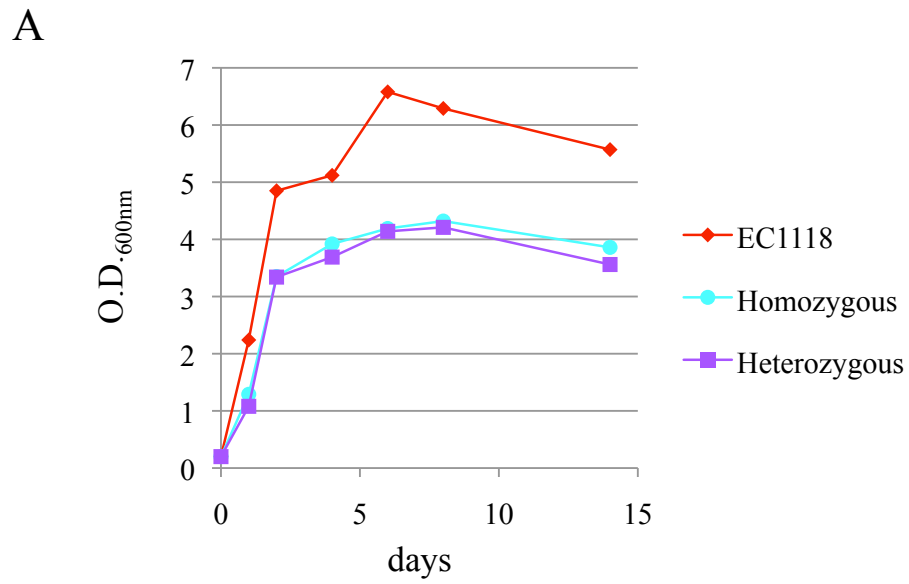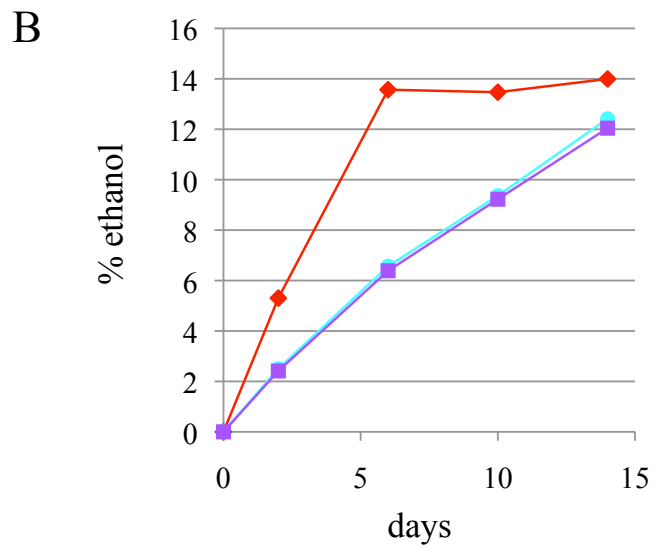

**Figure S1** Fermentation of the homozygous and heterozygous yeast deletion pools (S288C) and the EC1118 wine yeast strain in synthetic grape juice. Samples extracted from these fermentations were used for genome-wide fitness profiling. (A) Cell growth curve measured by O.D.<sub>600nm</sub>, (B) ethanol production.
