# Supplementary material for: Genome-wide Fitness Profiles Reveal a Requirement for Autophagy During Yeast Fermentation
Source: Oxford University Press journal article supplement (doi:10.1534/g3.111.000836), 2011-10-01
Supplement: 353_figures2.pdf [file 353_figures2.pdf]

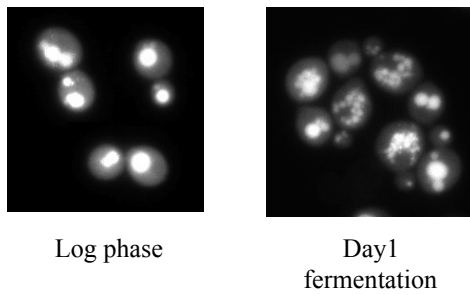

**Figure S2** Vacuoles fragment during fermentation. Diploid wild type yeast cells were imaged during log phase growth and after one day of fermentation in synthetic grape juice. Vacuoles were stained with the vacuole-specific dye CMAC (7-amino-4-chloromethylcoumarin) and imaged using a fluorescence microscope.
