# Supplementary material for: Genome-wide Fitness Profiles Reveal a Requirement for Autophagy During Yeast Fermentation
Source: G3 (Bethesda). 2011 Oct 1;1(5):353–67. doi: 10.1534/g3.111.000836 (PMC3276155; doi:10.1534/g3.111.000836)
Supplement: Supporting Information [file supp_1.5.353_TableS1.xlsx]

## Sheet: Table S1
Table S1. Homozygous deletion mutants with reduced fitness during fermentation
	ORF	Name
Verified	YCR107W	AAD3
Verified	YOR239W	ABP140
Verified	YMR289W	ABZ2
Verified	YLR131C	ACE2
Verified	YJL200C	ACO2
Verified	YKL206C	ADD66
Verified	YML030W	AIM31
Verified	YMR170C	ALD2
Verified	YPL195W	APL5
Verified	YML022W	APT1
Verified	YCR048W	ARE1
Verified	YOL058W	ARG1
Verified	YJL071W	ARG2
Verified	YHR018C	ARG4
Verified	YBR164C	ARL1
Verified	YHR129C	ARP1
Verified	YGL180W	ATG1
Verified	YLL042C	ATG10
Verified	YBR217W	ATG12
Verified	YPR185W	ATG13
Verified	YMR159C	ATG16
Verified	YFR021W	ATG18
Verified	YNL242W	ATG2
Verified	YPL166W	ATG29
Verified	YNR007C	ATG3
Verified	YPL149W	ATG5
Verified	YHR171W	ATG7
Verified	YBL078C	ATG8
Verified	YDL149W	ATG9
Verified	YLR114C	AVL9
Verified	YKR099W	BAS1
Verified	YER114C	BOI2
Verified	YCR094W	CDC50
Verified	YER164W	CHD1
Verified	YGR157W	CHO2
Verified	YLR330W	CHS5
Verified	YDR022C	CIS1
Verified	YKL190W	CNB1
Verified	YAL058W	CNE1
Verified	YLR218C	COA4
Verified	YML071C	COG8
Verified	YOL008W	COQ10
Verified	YJL172W	CPS1
Verified	YOR031W	CRS5
Verified	YDR179C	CSN9
Verified	YBR042C	CST26
Uncharacterized	YDR371W	CTS2
Verified	YMR264W	CUE1
Verified	YNL314W	DAL82
Verified	YKL149C	DBR1
Verified	YKR035W-A	DID2
Verified	YGR227W	DIE2
Verified	YKL213C	DOA1
Verified	YDR273W	DON1
Verified	YDR121W	DPB4
Verified	YLR172C	DPH5
Verified	YMR299C	DYN3
Verified	YJR082C	EAF6
Verified	YOR092W	ECM3
Verified	YBL047C	EDE1
Verified	YHR193C	EGD2
Verified	YJL196C	ELO1
Verified	YCL045C	EMC1
Verified	YOL071W	EMI5
Verified	YDR414C	ERD1
Verified	YNL127W	FAR11
Verified	YLR404W	FLD1
Verified	YHR176W	FMO1
Uncharacterized	YLR454W	FMP27
Verified	YBL013W	FMT1
Verified	YLR214W	FRE1
Verified	YDR283C	GCN2
Verified	YFR009W	GCN20
Verified	YKR026C	GCN3
Verified	YOR355W	GDS1
Verified	YDL100C	GET3
Verified	YDR507C	GIN4
Verified	YML006C	GIS4
Verified	YOL089C	HAL9
Verified	YKL109W	HAP4
Verified	YOR358W	HAP5
Verified	YEL056W	HAT2
Verified	YKR084C	HBS1
Verified	YNL014W	HEF3
Verified	YCL030C	HIS4
Verified	YLR450W	HMG2
Verified	YDR305C	HNT2
Verified	YBR215W	HPC2
Verified	YOR267C	HRK1
Verified	YKL101W	HSL1
Verified	YER039C	HVG1
Verified	YER092W	IES5
Verified	YJL153C	INO1
Verified	YDR123C	INO2
Verified	YMR163C	INP2
Verified	YDR072C	IPT1
Verified	YJL051W	IRC8
Verified	YKR019C	IRS4
Verified	YOL002C	IZH2
Verified	YMR294W	JNM1
Verified	YIL125W	KGD1
Verified	YDR148C	KGD2
Verified	YDR483W	KRE2
Verified	YKL205W	LOS1
Verified	YCL034W	LSB5
Verified	YIL094C	LYS12
Verified	YGL154C	LYS5
Verified	YDR005C	MAF1
Verified	YEL053C	MAK10
Verified	YOR298C-A	MBF1
Verified	YBR227C	MCX1
Verified	YFR030W	MET10
Verified	YIR017C	MET28
Verified	YJR137C	MET5
Verified	YIR033W	MGA2
Verified	YOR231W	MKK1
Verified	YKR095W	MLP1
Verified	YGL087C	MMS2
Uncharacterized	YIL110W	MNI1
Verified	YLR219W	MSC3
Verified	YHR039C	MSC7
Verified	YDR386W	MUS81
Verified	YBL024W	NCL1
Verified	YOL104C	NDJ1
Verified	YDL002C	NHP10
Verified	YGL221C	NIF3
Verified	YJL126W	NIT2
Verified	YIL038C	NOT3
Verified	YEL062W	NPR2
Verified	YHL023C	NPR3
Verified	YDR001C	NTH1
Verified	YAR002W	NUP60
Verified	YBR025C	OLA1
Verified	YJR073C	OPI3
Dubious	YKR035C	OPI8
Verified	YOR130C	ORT1
Verified	YOR269W	PAC1
Verified	YER007W	PAC2
Uncharacterized	YGL261C	PAU11
Verified	YNL289W	PCL1
Verified	YLR044C	PDC1
Verified	YLR266C	PDR8
Verified	YPL154C	PEP4
Verified	YNL326C	PFA3
Verified	YNL316C	PHA2
Verified	YGR086C	PIL1
Verified	YOL100W	PKH2
Verified	YJR043C	POL32
Verified	YHR075C	PPE1
Verified	YNR032W	PPG1
Verified	YDR435C	PPM1
Verified	YPL156C	PRM4
Verified	YBL046W	PSY4
Verified	YHR076W	PTC7
Verified	YNL016W	PUB1
Verified	YER162C	RAD4
Verified	YJR033C	RAV1
Verified	YDR202C	RAV2
Verified	YOR265W	RBL2
Verified	YCL001W	RER1
Verified	YLR073C	RFU1
Verified	YBR275C	RIF1
Verified	YFL033C	RIM15
Verified	YDR198C	RKM2
Verified	YDR255C	RMD5
Verified	YOR018W	ROD1
Verified	YBR229C	ROT2
Verified	YPR065W	ROX1
Verified	YJL148W	RPA34
Verified	YBL087C	RPL23A
Verified	YIL052C	RPL34B
Verified	YGR027C	RPS25A
Verified	YPL152W	RRD2
Verified	YOR118W	RTC5
Verified	YDR143C	SAN1
Verified	YER047C	SAP1
Verified	YER120W	SCS2
Verified	YGL126W	SCS3
Verified	YKL148C	SDH1
Verified	YLL041C	SDH2
Verified	YLR058C	SHM2
Verified	YDR078C	SHU2
Verified	YBR103W	SIF2
Verified	YNL032W	SIW14
Verified	YBL061C	SKT5
Verified	YGR271W	SLH1
Verified	YNL334C	SNO2
Verified	YJL036W	SNX4
Verified	YCR073W-A	SOL2
Verified	YAL047C	SPC72
Verified	YOL052C	SPE2
Verified	YBR250W	SPO23
Verified	YML034W	SRC1
Verified	YLR119W	SRN2
Verified	YKR092C	SRP40
Verified	YDL229W	SSB1
Verified	YIL030C	SSM4
Verified	YNL025C	SSN8
Verified	YMR183C	SSO2
Verified	YLR150W	STM1
Verified	YPL163C	SVS1
Verified	YDR395W	SXM1
Verified	YBR044C	TCM62
Verified	YHR167W	THP2
Verified	YOR297C	TIM18
Verified	YPR074C	TKL1
Verified	YDR105C	TMS1
Verified	YAL016W	TPD3
Verified	YPR156C	TPO3
Verified	YPL176C	TRE1
Verified	YDR120C	TRM1
Verified	YML014W	TRM9
Verified	YDR059C	UBC5
Verified	YMR022W	UBC7
Verified	YLL039C	UBI4
Verified	YDL122W	UBP1
Verified	YBL067C	UBP13
Verified	YBR058C	UBP14
Verified	YLR024C	UBR2
Verified	YML013W	UBX2
Verified	YDL190C	UFD2
Verified	YLR168C	UPS2
Uncharacterized	YDR520C	URC2
Verified	YKR042W	UTH1
Verified	YJR049C	UTR1
Verified	YNL054W	VAC7
Verified	YIL135C	VHS2
Verified	YLR410W	VIP1
Verified	YDR049W	VMS1
Verified	YPL120W	VPS30
Verified	YLR360W	VPS38
Verified	YOR069W	VPS5
Verified	YML076C	WAR1
Verified	YHL009C	YAP3
Verified	YKL065C	YET1
Verified	YDL072C	YET3
Verified	YOL128C	YGK3
Verified	YMR152W	YIM1
Verified	YGR281W	YOR1
Verified	YOR291W	YPK9
Verified	YDR368W	YPR1
Verified	YHR017W	YSC83
Verified	YDR285W	ZIP1
Verified	YGL255W	ZRT1
Uncharacterized	YBL059W
Dubious	YBL083C
Uncharacterized	YBR056W
Dubious	YBR099C
Dubious	YDL023C
Dubious	YDR048C
Dubious	YDR157W
Verified	YDR186C
Dubious	YDR199W
Dubious	YDR203W
Dubious	YDR220C
Dubious	YDR274C
Dubious	YDR426C
Dubious	YDR442W
Dubious	YER066C-A
Dubious	YER084W
Dubious	YER091C-A
Dubious	YER119C-A
Dubious	YFL013W-A
Dubious	YGL042C
Dubious	YGL149W
Dubious	YGR064W
Dubious	YGR228W
Uncharacterized	YHR162W
Dubious	YIL025C
Uncharacterized	YIL077C
Uncharacterized	YJL160C
Dubious	YJL175W
Uncharacterized	YJR030C
Uncharacterized	YKL033W-A
Uncharacterized	YKL151C
Uncharacterized	YKR106W
Uncharacterized	YLL007C
Uncharacterized	YLR125W
Dubious	YLR252W
Uncharacterized	YLR297W
Uncharacterized	YLR422W
Uncharacterized	YLR456W
Dubious	YMR135W-A
Dubious	YMR158W-B
Dubious	YMR254C
Verified	YMR295C
Uncharacterized	YNL058C
Uncharacterized	YNL217W
Verified	YNL311C
Dubious	YNR005C
Uncharacterized	YOL047C
Uncharacterized	YOR021C
Dubious	YOR082C
Dubious	YOR105W
Uncharacterized	YOR246C
Dubious	YOR263C
Dubious	YOR300W
Dubious	YOR366W
Dubious	YOR376W
Dubious	YOR379C
