# Supplementary material for: Genome-wide Fitness Profiles Reveal a Requirement for Autophagy During Yeast Fermentation
Source: G3 (Bethesda). 2011 Oct 1;1(5):353–67. doi: 10.1534/g3.111.000836 (PMC3276155; doi:10.1534/g3.111.000836)
Supplement: Supporting Information [file supp_1.5.353_TableS2.xlsx]

## Sheet: Table S2
Table S2. Homozygous deletion mutants with increased fitness during fermentation
	ORF	Name
Verified	YJR083C	ACF4
Verified	YMR009W	ADI1
Verified	YPL202C	AFT2
Verified	YCR082W	AHC2
Verified	YOL053W	AIM39
Uncharacterized	YLR089C	ALT1
Verified	YJL084C	ALY2
Verified	YPR128C	ANT1
Verified	YBR286W	APE3
Verified	YNL077W	APJ1
Verified	YPR192W	AQY1
Verified	YNR019W	ARE2
Verified	YPR200C	ARR2
Verified	YDL088C	ASM4
Verified	YGR177C	ATF2
Verified	YJR121W	ATP2
Verified	YJR001W	AVT1
Verified	YLL063C	AYT1
Verified	YIL015W	BAR1
Verified	YJL095W	BCK1
Verified	YER177W	BMH1
Verified	YJR078W	BNA2
Uncharacterized	YLR267W	BOP2
Verified	YAR014C	BUD14
Verified	YEL029C	BUD16
Verified	YMR275C	BUL1
Verified	YML111W	BUL2
Verified	YKL005C	BYE1
Verified	YML102W	CAC2
Verified	YOR276W	CAF20
Verified	YIL034C	CAP2
Verified	YIL043C	CBR1
Verified	YLR110C	CCW12
Verified	YLR308W	CDA2
Verified	YCL064C	CHA1
Verified	YDR254W	CHL4
Verified	YOR356W	CIR2
Verified	YPR119W	CLB2
Verified	YAL040C	CLN3
Verified	YML110C	COQ5
Verified	YHR116W	COX23
Verified	YDL142C	CRD1
Verified	YJL006C	CTK2
Verified	YPL064C	CWC27
Verified	YKL096W-A	CWP2
Verified	YML054C	CYB2
Verified	YIR023W	DAL81
Verified	YML113W	DAT1
Verified	YLR128W	DCN1
Verified	YOR173W	DCS2
Uncharacterized	YKL121W	DGR2
Verified	YHR011W	DIA4
Verified	YPL265W	DIP5
Verified	YBR278W	DPB3
Verified	YKL160W	ELF1
Verified	YIL005W	EPS1
Verified	YLR246W	ERF2
Verified	YFR041C	ERJ5
Verified	YJL155C	FBP26
Verified	YCR034W	FEN1
Verified	YLL029W	FRA1
Verified	YLR343W	GAS2
Verified	YOL030W	GAS5
Verified	YFL021W	GAT1
Verified	YOR120W	GCY1
Verified	YKR030W	GMH1
Verified	YER020W	GPA2
Verified	YHR104W	GRE3
Verified	YJR090C	GRR1
Verified	YOR185C	GSP2
Verified	YLL060C	GTT2
Verified	YLR289W	GUF1
Verified	YMR192W	GYL1
Verified	YCR065W	HCM1
Verified	YDR317W	HIM1
Verified	YMR011W	HXT2
Verified	YBR157C	ICS2
Verified	YLR099C	ICT1
Verified	YOR189W	IES4
Verified	YPR061C	JID1
Dubious	YLR331C	JIP3
Verified	YNL322C	KRE1
Verified	YOR123C	LEO1
Verified	YNL104C	LEU4
Verified	YFR024C-A	LSB3
Verified	YDR378C	LSM6
Uncharacterized	YJR024C	MDE1
Verified	YOL009C	MDM12
Verified	YLR288C	MEC3
Verified	YPR167C	MET16
Verified	YJR144W	MGM101
Verified	YPL098C	MGR2
Verified	YGL035C	MIG1
Verified	YJR077C	MIR1
Verified	YBR098W	MMS4
Verified	YPL224C	MMT2
Verified	YOR350C	MNE1
Verified	YER001W	MNN1
Verified	YJL186W	MNN5
Verified	YOL088C	MPD2
Verified	YNR024W	MPP6
Verified	YPR079W	MRL1
Verified	YDR205W	MSC2
Verified	YOL116W	MSN1
Verified	YBR255W	MTC4
Verified	YHR151C	MTC6
Verified	YKL074C	MUD2
Verified	YMR004W	MVP1
Verified	YDR493W	MZM1
Verified	YMR080C	NAM7
Verified	YKR048C	NAP1
Verified	YLR315W	NKP2
Verified	YGR010W	NMA2
Verified	YNL175C	NOP13
Verified	YNL183C	NPR1
Verified	YNL056W	OCA2
Verified	YHL020C	OPI1
Verified	YOL032W	OPI10
Verified	YLR350W	ORM2
Verified	YHR179W	OYE2
Verified	YBR295W	PCA1
Verified	YBR186W	PCH2
Verified	YIL050W	PCL7
Verified	YGL248W	PDE1
Verified	YNL264C	PDR17
Verified	YOR153W	PDR5
Verified	YJL023C	PET130
Verified	YJR034W	PET191
Verified	YKL197C	PEX1
Verified	YDR265W	PEX10
Verified	YLR191W	PEX13
Verified	YNL214W	PEX17
Verified	YAL055W	PEX22
Verified	YGR133W	PEX4
Verified	YNL329C	PEX6
Verified	YGR077C	PEX8
Verified	YGR132C	PHB1
Verified	YGR231C	PHB2
Verified	YDL236W	PHO13
Verified	YML123C	PHO84
Verified	YBR296C	PHO89
Verified	YNR013C	PHO91
Verified	YBL022C	PIM1
Verified	YOR363C	PIP2
Verified	YKL163W	PIR3
Verified	YDR490C	PKH1
Verified	YCR024C-A	PMP1
Verified	YBR276C	PPS1
Verified	YIL095W	PRK1
Verified	YJL108C	PRM10
Verified	YML047C	PRM6
Uncharacterized	YOL054W	PSH1
Verified	YLL010C	PSR1
Dubious	YKL076C	PSY1
Verified	YCR079W	PTC6
Verified	YKL039W	PTM1
Verified	YDL230W	PTP1
Verified	YGL014W	PUF4
Verified	YLR204W	QRI5
Verified	YCR066W	RAD18
Verified	YGR258C	RAD2
Verified	YPL246C	RBD2
Verified	YJR021C	REC107
Verified	YMR133W	REC114
Verified	YOL080C	REX4
Verified	YOR107W	RGS2
Verified	YCR027C	RHB1
Verified	YOR275C	RIM20
Verified	YPR018W	RLF2
Verified	YDR279W	RNH202
Verified	YJR063W	RPA12
Verified	YER169W	RPH1
Verified	YMR121C	RPL15B
Verified	YNL069C	RPL16B
Verified	YJL177W	RPL17B
Verified	YLR344W	RPL26A
Verified	YFR031C-A	RPL2A
Verified	YLL045C	RPL8B
Verified	YNL067W	RPL9B
Verified	YLR421C	RPN13
Verified	YDL020C	RPN4
Verified	YOL039W	RPP2A
Verified	YCR031C	RPS14A
Verified	YOR216C	RUD3
Verified	YBR280C	SAF1
Verified	YJR004C	SAG1
Verified	YMR263W	SAP30
Verified	YER019C-A	SBH2
Verified	YPR129W	SCD6
	YLL016W	SDC25
Verified	YHR207C	SET5
Verified	YJL145W	SFH5
Verified	YPR198W	SGE1
Verified	YJR134C	SGM1
Verified	YMR175W	SIP18
Verified	YNL257C	SIP3
Verified	YDL052C	SLC1
Verified	YBR156C	SLI15
Verified	YBR077C	SLM4
Verified	YPR054W	SMK1
Verified	YML058W	SML1
Verified	YOR327C	SNC2
Verified	YIL016W	SNL1
Verified	YMR016C	SOK2
Verified	YML055W	SPC2
Verified	YMR191W	SPG5
Verified	YNL204C	SPS18
Verified	YCL048W	SPS22
Verified	YER161C	SPT2
Verified	YLR055C	SPT8
Verified	YPR032W	SRO7
Verified	YER103W	SSA4
Verified	YMR039C	SUB1
Verified	YDR346C	SVF1
Verified	YDR146C	SWI5
Verified	YPR095C	SYT1
Verified	YGL232W	TAN1
Verified	YML072C	TCB3
Verified	YGR192C	TDH3
Verified	YJR019C	TES1
Verified	YDL080C	THI3
Verified	YPL214C	THI6
Verified	YLR327C	TMA10
Verified	YJR066W	TOR1
Verified	YMR156C	TPP1
Verified	YDR007W	TRP1
Verified	YPR066W	UBA3
Verified	YER144C	UBP5
Verified	YBR006W	UGA2
Verified	YPL139C	UME1
Verified	YML021C	UNG1
Verified	YML106W	URA5
Verified	YPL253C	VIK1
Verified	YBR127C	VMA2
Verified	YJL029C	VPS53
Verified	YNL197C	WHI3
Verified	YHR134W	WSS1
Verified	YFL010C	WWM1
Verified	YJL141C	YAK1
Verified	YHR135C	YCK1
Verified	YCR059C	YIH1
Verified	YNL237W	YTP1
Verified	YJR099W	YUH1
Verified	YJL139C	YUR1
Dubious	YAL056C-A
Uncharacterized	YBR074W
Uncharacterized	YBR197C
Uncharacterized	YBR284W
Dubious	YBR292C
Dubious	YBR300C
Dubious	YCL022C
Dubious	YCL023C
Uncharacterized	YCR007C
Dubious	YCR085W
Dubious	YDL011C
Dubious	YDL094C
Dubious	YDR008C
Dubious	YDR269C
Uncharacterized	YDR506C
Dubious	YER087C-A
Dubious	YER135C
Dubious	YFL019C
Uncharacterized	YGR017W
Dubious	YGR051C
Uncharacterized	YGR071C
Uncharacterized	YGR117C
Dubious	YHL037C
Dubious	YIL028W
Uncharacterized	YIL029C
Dubious	YIL032C
Uncharacterized	YIL055C
Uncharacterized	YJL144W
Uncharacterized	YJL163C
Uncharacterized	YJL206C
Dubious	YJL211C
Uncharacterized	YJL218W
Uncharacterized	YJR008W
Uncharacterized	YJR039W
Uncharacterized	YJR129C
Verified	YKL069W
Uncharacterized	YLR042C
Dubious	YLR111W
Uncharacterized	YLR152C
Dubious	YLR236C
Dubious	YLR294C
Dubious	YLR374C
Dubious	YLR434C
Uncharacterized	YML079W
Verified	YMR086W
Uncharacterized	YNL115C
Dubious	YNL203C
Dubious	YNL235C
Uncharacterized	YNR061C
Dubious	YOL079W
Dubious	YOR072W
Uncharacterized	YOR097C
Dubious	YOR170W
Uncharacterized	YOR186W
Uncharacterized	YOR238W
Verified	YPL060W
Uncharacterized	YPL077C
Uncharacterized	YPR089W
Dubious	YPR126C
