# Supplementary material for: Genome-wide Fitness Profiles Reveal a Requirement for Autophagy During Yeast Fermentation
Source: G3 (Bethesda). 2011 Oct 1;1(5):353–67. doi: 10.1534/g3.111.000836 (PMC3276155; doi:10.1534/g3.111.000836)
Supplement: Supporting Information [file supp_1.5.353_TableS3.xlsx]

## Sheet: gene name sort
Table S3. Homozygous deletion mutant pool fermentation fitness profiles
ORF	Name	Tag	2vs1	4vs1	6vs1	8vs1	10vs1	14vs1
YMR056C	AAC1	D	0.893159	0.569177	0.563468	0.0490886	0.224115	-0.0949218
YMR056C	AAC1	U	-0.363771	0.416512	-0.16074	-0.0103493	0.23192	0.0171151
YCR107W	AAD3	D	-0.14766	0.590045	-0.849939	0.466454	0.387293	1.78509
YCR107W	AAD3	D	-0.0981289	0.297119	-0.927942	0.978524	-0.0795988	0.857402
YCR107W	AAD3	U	-2.03461	-2.14693	-2.0902	0.137754	-1.78454	0.160518
YDL243C	AAD4	U	0.0927095	-0.132483	-0.153401		-0.0847411	-0.0628807
YDL243C	AAD4	D	0.267315	-0.969474	-0.574303	-0.105448	-0.131833	-0.437581
YFL056C	AAD6	D	-1.03093	-0.561998	-0.424774	-0.365077	0.821568
YFL056C	AAD6	U	0.320397	-0.565764	1.08853	0.461734	0.34508	0.0943575
YNL141W	AAH1	D	-0.197759	0.163996	0.385447	-0.565147	-0.188996	-0.144028
YNL141W	AAH1	D	-1.40391	-0.688472	-0.305315	0.0769727	-0.528684	-0.30986
YNL141W	AAH1	U	0.358157	0.231117	0.183682	-0.955794	-0.395971	0.181465
YHR047C	AAP1	D	-0.170484	-1.13495	-0.0381221	0.105365	0.366742	-0.325835
YHR047C	AAP1	U	0.834105	0.593597	0.573742	0.799533	0.781341	0.64626
YKL106W	AAT1	D	-0.0450497	-0.162222	-0.582534	-0.300414	-1.15026	-0.0679497
YKL106W	AAT1	U	-0.813516	-0.648415	-1.08468	1.0892	-2.02537	-0.371987
YJR108W	ABM1	D	0.769691		0.302895	0.384909	0.350267	0.128643
YJR108W	ABM1	U	0.341975	-1.67529	0.0982029	0.960631	-0.21221	-0.122457
YCR088W	ABP1	D	-0.328495	-0.366412	-0.331445	-0.419369	-0.237097	0.00709763
YCR088W	ABP1	U	0.235096	-0.835737	0.0154773	-0.117109	-0.267696	0.168329
YOR239W	ABP140	D	-0.0893071	0.75648	-0.152354	-0.437965	-0.100245	-1.46399
YOR239W	ABP140	U	-1.63967	-0.260427	-1.70712	0.22366	-1.10548	-0.0254341
YNR033W	ABZ1	D	0.196839	0.2383	-0.465235	-0.175565	0.208357	-0.378332
YNR033W	ABZ1	U	-0.172652	0.200181	0.249186	1.13641	0.125354	0.504414
YMR289W	ABZ2	U	-4.66386	-3.29061	-2.89838	-0.672565	-3.38899	0.309765
YER045C	ACA1	D	0.12049	0.00825225	-0.380553	0.160023	-0.720163	-0.0983114
YER045C	ACA1	U	0.189443	-1.2418	0.375583	0.0639016	0.427932	0.207912
YGR037C	ACB1	U			0.597935	0.461929	0.218755	-0.701684
YGR037C	ACB1	D	-0.716453		-0.178291	0.267283	-0.060197	0.0551837
YLR131C	ACE2	D	-0.493091		-0.886884	-1.30554	-2.5037
YLR131C	ACE2	U	-1.5494	-1.01587	-2.6077	-0.238169	-1.64967	-0.816157
YLR144C	ACF2	D	-0.49516	-0.750722	0.620275	2.18556	-0.261709	0.702064
YLR144C	ACF2	U	-0.397006	0.795957	-2.42652	0.187622	1.78789e-05	-0.992056
YJR083C	ACF4	D	2.05561	0.654725	1.48494	-0.000274652	1.0213	-0.222046
YJR083C	ACF4	U	2.02742	0.625831	1.38256	0.855074	1.0639	-0.0875931
YBL015W	ACH1	D	0.349697	0.769781	0.328349	-0.439015	-0.157378	-0.255709
YBL015W	ACH1	U	-0.743477	-0.66745	-0.546818	-0.903153	-0.764315	-0.434478
YDL203C	ACK1	U	0.387698		0.174056	-0.343446	1.19675	-1.41829
YPL267W	ACM1	D	0.703532	-0.464872	0.70017	-0.610663	-0.0918828	0.171971
YPL267W	ACM1	U	-0.690763	0.190096	-1.04872	-0.59162	-0.553374	-0.197131
YDR511W	ACN9	D	1.15897	-0.696908	0.677041	1.1801	-1.06169	0.178401
YDR511W	ACN9	U	0.455221	-0.378508	0.902092	-0.671037	0.122682	-0.288231
YJL200C	ACO2	D	-0.355015	-1.40054	-1.11557	-0.264063	-1.52002	-0.863556
YJL200C	ACO2	U	-0.0301304	-0.767046	-0.224182	-0.501955	0.545107	-0.225567
YAL054C	ACS1	D	-0.286286	-0.633342	-0.364755	0.101857	-0.269369	-0.0232405
YAL054C	ACS1	U	0.127548	-0.192541	-0.322468	-0.0541124	0.251946	0.00438231
YMR184W	ADD37	D	-2.87166	-0.46933	-1.32745		0.428383	6.34187
YMR184W	ADD37	U	0.791947	0.6271	0.991256	1.41962	0.424643	0.284685
YKL206C	ADD66	D	0.411908	-0.624644	-0.89427	0.615325	0.262733	0.145272
YKL206C	ADD66	U	-2.58476	-3.91893	-0.923367	-0.240982	-2.42769	0.289656
YAR015W	ADE1	U	3.13769		4.71047	0.0338627
YLR028C	ADE16	U	0.926822	0.259396	0.760473	-0.133734	0.598241	0.13948
YMR120C	ADE17	D	0.518827	0.540927	0.728475	0.00800355	-0.0297876	-0.204113
YMR120C	ADE17	U	-0.546404	-0.890699	0.178721	0.277603	0.536253	-0.0207829
YMR303C	ADH2	D	-0.261397	0.248425	0.423606	0.209875	0.773949	0.105628
YMR303C	ADH2	U	-0.32424	-0.0776281	-0.194782	0.653877	0.219068	0.406283
YMR083W	ADH3	D	-0.767817	0.459061	0.836565	-0.170812	-0.618249	0.634802
YMR083W	ADH3	U	-1.07333	-0.670027	-0.965908	1.639	-1.88978	-0.0118346
YGL256W	ADH4	D	-0.127724	-0.771865	-0.516551	0.409799	0.0645707	0.635888
YGL256W	ADH4	U	-0.189149	-0.50504	0.216122	0.0739355	0.538097	0.275274
YBR145W	ADH5	U	0.160762	0.619435	-0.267104		-0.443125	0.176916
YBR145W	ADH5	D	0.16499	-0.748491	-0.0688868	0.556665	0.0685259	-0.330361
YMR318C	ADH6	D	-0.392617	0.270248	0.292759	0.0806668	-0.0590049	-1.04545
YMR318C	ADH6	U	-0.215108	0.00152085	-0.305995	-0.192039	-0.170819	-0.00963653
YCR105W	ADH7	D	0.518697	1.14725	-0.0601383	0.684378	0.809399	-0.484349
YCR105W	ADH7	U	-0.165687	0.726501	-0.693285	0.0979268	0.336589	0.049962
YMR009W	ADI1	U	1.13783	1.06969	0.450638		1.2528	-0.0344537
YER170W	ADK2	D	-0.64066	0.410961	-0.545531	-0.435329	-0.187571	-0.167047
YER170W	ADK2	U	0.145484	-0.383612	0.291568	0.590047	0.0594111	0.466621
YCR011C	ADP1	D	-0.0771518	0.881543	-1.06243	-0.230344	-0.0803647	-0.636741
YCR011C	ADP1	U	1.0842	0.633895	-0.0756416	-0.531613	1.55069	-0.55716
YDR216W	ADR1	D	0.273944	-0.129227	-0.829786	1.03559	0.0567761	2.36555
YDR216W	ADR1	D	0.916043	0.681591	-0.467204	0.285346	0.604873	0.512988
YDR216W	ADR1	U	0.136348	-0.0887139	0.398221	-0.630868	0.643075	0.305589
YCR010C	ADY2	D	0.208657	0.698537	-0.268404	-0.398865	0.624627	0.232129
YCR010C	ADY2	U	0.494967	0.659948	0.604039	0.211205	0.13033	0.124878
YDL239C	ADY3	D	0.222351	-0.518331	-0.0548227	0.52797	0.317116	0.542595
YDL239C	ADY3	U	-0.672272	-0.504635	-1.07964	0.10452	-0.404453	0.221827
YLR227C	ADY4	U	-0.359005	-0.967809	-0.172546	-0.406248	-1.73152	0.21683
YEL052W	AFG1	D	3.58676		0.226775		0.560551
YEL052W	AFG1	D	0.993434	-0.459561	0.041822	0.147838	0.88293	-0.0953865
YEL052W	AFG1	U	0.719932	0.18231	-0.106181	-0.647846	0.692888	-0.598251
YDR085C	AFR1	D	1.09527	-0.978798	1.07253	0.358996	-0.0707564	0.381329
YDR085C	AFR1	U	-0.259291	-1.01808	0.147747	-1.1576	0.142028	0.19047
YPL202C	AFT2	D	1.60471	3.51478	3.83483	0.937564	2.28401	0.237499
YPL202C	AFT2	U	0.029081	0.0747233	-1.12551	1.20394	-1.06415	0.610451
YGL032C	AGA2	D	0.662755	0.177143	0.861757	0.166317	-0.414597	0.579557
YGL032C	AGA2	U	-1.18462	-1.14803	0.405139	0.320133	0.668569	0.146552
YPR021C	AGC1	D	0.131106	-0.20029	0.141403	0.530323	0.369065	0.995009
YPR021C	AGC1	U	-0.703628	0.0248677	-0.434499	0.28883	0.143699	0.375881
YDR524C	AGE1	U	-0.163422		0.911773	-1.16492	1.51806	0.0360037
YDR524C	AGE1	D	0.0359149	0.135011	1.44485	0.279132	0.546103	-0.926002
YIL044C	AGE2	D	-1.12488	0.276668		-0.714142	-1.25719
YIL044C	AGE2	U	-0.387787	0.397344	0.632152	-0.249004	-3.07493
YCL025C	AGP1	D	0.453434	0.543694	0.0576816	0.319663	0.962298	-0.00269321
YFL055W	AGP3	D	-0.168875	-0.150302	-0.151147	0.0480247	-0.437094	0.291575
YFL030W	AGX1	D	-0.748166	0.17914	-0.0336927	1.05736	-0.488063	-0.44139
YFL030W	AGX1	U	-0.430976	0.13746	-0.0365944	0.226417	-0.396666	-0.127101
YDR214W	AHA1	D	0.216993	0.72665	-0.0966513	0.280884	0.031683	0.994194
YDR214W	AHA1	U	0.566585	-0.657373	0.482845	-0.0138029	0.243385	0.00661381
YOR023C	AHC1	D	0.142416	-0.383868	0.449174	0.731587	-0.400764	0.774885
YOR023C	AHC1	U	-0.582651	-0.363273	-0.335757	0.896695	-0.424705	0.801274
YCR082W	AHC2	U	1.50475	1.56024	0.211371		1.00425
YCR082W	AHC2	D	0.167542	0.993072	0.301243	0.389706	-0.582884	-0.0207051
YLR109W	AHP1	D	-0.179794	-0.436637	0.661466	0.420672	-0.525978	0.0594291
YLR109W	AHP1	U	-0.159967	0.476684	0.210611	-0.152422	-0.275801	0.0024036
YHR093W	AHT1	U	-0.0916174	-0.270678	-0.108501	0.16229	-0.559757	-0.164991
YMR092C	AIP1	U	0.199858	1.38745	-1.18928		-0.301737
YMR092C	AIP1	D	0.189363	0.163784	-0.590284		-0.0257925	0.675875
YMR092C	AIP1	U	-0.0669321	0.778044	0.927183	0.345468	0.287019	-0.0145909
YIL079C	AIR1	U	-0.872288	-0.947504	-0.402554	-1.05679	-1.01417
YIL079C	AIR1	D	0.589945	-2.45097	-1.70753	-0.508107	-0.281066	-0.676483
YDL175C	AIR2	D	-0.983637	0.288543	-0.119412	-0.736793	0.588993	0.0156968
YBR059C	AKL1	D	0.261055	-0.0196462	0.245571	-0.44189	0.127108	-0.212429
YBR059C	AKL1	U	0.361628	0.38949	0.501001	-0.368183	0.405694	-0.503444
YOR034C	AKR2	D	-0.421912	-0.0479782	-0.616911	0.192692	-0.332663	0.567638
YOR034C	AKR2	U	-1.16399	0.271592	-1.07064	0.493683	0.0488994	0.55591
YJL122W	ALB1	U	-0.249318	-0.0623726	-5.91827e-05	0.0816809	-0.630869	-0.22154
YMR170C	ALD2	D	-3.20996		-1.37077		-2.12766
YMR170C	ALD2	U	0.065385	0.118805	0.60302	-0.467183	0.98991	-0.432367
YMR169C	ALD3	D	0.546297	-0.380542	0.0139569	0.427267	-0.464404	0.766797
YMR169C	ALD3	D	-0.522106	-0.176263	0.107984	0.289084	0.446888	0.144252
YMR169C	ALD3	D	1.21232	0.673363	0.982379	0.916509	0.828574	-0.197354
YMR169C	ALD3	U	-0.882534	-0.200699	-0.688998	-1.84199	0.0615121	0.152457
YOR374W	ALD4	U	-0.00568182	-0.36418	0.252366	-0.210147	0.0132083	0.215164
YER073W	ALD5	D	0.724095	-2.35325	-0.083621	0.0241489	0.0878091	0.0709318
YER073W	ALD5	U	-0.400145	-1.50222	-0.481966	0.53734	-1.06716	0.21301
YNL148C	ALF1	D	1.79901	7.16696	0.53028		-0.871992	-2.80968
YNR030W	ALG12	D	-0.139921	-1.39574	-0.274225	-0.376095	-0.0417282	-0.534025
YNR030W	ALG12	U	-0.232592	-0.268952	0.183651	-0.216754	0.539951	0.0172301
YBL082C	ALG3	D	0.373525	-0.257096	-1.49923	2.14347	-0.327355
YBL082C	ALG3	U	1.04526	0.627252	-0.078428		-0.643508	0.109282
YPL227C	ALG5	U	0.958932		-1.0101	1.50127	-0.410152	-1.4099
YPL227C	ALG5	D	1.75461	-0.948503	-0.818334	-0.561822	-0.11153	-0.388936
YOR002W	ALG6	D	-0.421559	1.24011	-3.55124	0.292645	-0.428747	0.172753
YOR002W	ALG6	U	-0.490063	-3.77329	-0.377076	0.062164	-0.0531152	0.150258
YOR067C	ALG8	D	0.65129	0.410803	-0.643684	-0.152208	0.0170009	-0.576804
YOR067C	ALG8	U	-0.55854	-0.328511	-1.08022	0.269719	-0.815495	-0.481044
YNL219C	ALG9	D	0.135092	0.507305	0.262451	0.648792	-0.373366	0.083649
YNL219C	ALG9	U	-0.433968	-0.412994	-0.828459	-0.605959	-0.866792	0.109265
YGL021W	ALK1	D	0.777655	1.63041	0.210297	0.248733	-0.159548	-0.30661
YGL021W	ALK1	U	-0.544051	1.21591	-0.161801	0.33121	-0.52266	-0.697296
YML086C	ALO1	D	-0.663925	-1.34005	0.251411	0.959041	-0.687949	0.735559
YML086C	ALO1	U	0.302248	-0.559085	-0.320909	1.93419	-0.197831	0.935854
YNL270C	ALP1	D	-0.447767	-0.684246	-0.640041	-0.65486	-0.396401	0.28153
YNL270C	ALP1	U	-0.875559	-0.583904	-0.670919	-1.13946	-0.778763	-0.180797
YFL050C	ALR2	D	0.629875	-1.19513	0.654991	0.814054	-0.854645	0.0559434
YFL050C	ALR2	U	0.992762	-0.429237	0.812617	0.483863	0.279305	-0.768786
YLR089C	ALT1	D	-3.07422	3.49378	3.5173	0.282597	3.07216	-0.496586
YLR089C	ALT1	U	3.2782	2.62766	3.67729	2.67911	2.94656	1.43766
YDR111C	ALT2	D	-0.271703	0.180463	-0.671608	-0.723447	-0.320749	-0.653613
YDR111C	ALT2	U	-0.12302	-0.246909	-0.396924	-0.492909	-0.41349	0.0778096
YGR225W	AMA1	D	-0.231807	0.457745	1.14399	0.311259	0.226774	0.969821
YGR225W	AMA1	U	0.32146	-0.201722	0.067776	0.911962	-0.0604371	1.24887
YML035C	AMD1	D	0.322606	2.76625	-0.401404	-0.0195934	1.03497	-0.193162
YML035C	AMD1	D	-0.222599	0.732534	-0.29891	-0.792721	0.97639	-0.370529
YML035C	AMD1	U	-0.265799	0.146456	-0.824727	-1.20083	-0.222903	-1.0619
YDR242W	AMD2	D	1.01789	0.571929	0.695084		0.534221	-0.451155
YDR242W	AMD2	D	0.695096	-0.210871	-0.39082	0.669265	0.0547009	1.86837
YDR242W	AMD2	U	0.297772	1.30776	-0.180984	0.28643	1.37376	0.644596
YDR242W	AMD2	U	-0.0879364	0.537372	-0.40682	0.0999858	1.14218	0.272733
YBR158W	AMN1	D	0.0405126	0.193994	0.151893	-1.99073	1.17079	-0.00916212
YGL156W	AMS1	D	-0.96353	-1.44089	0.38531	0.0771394	0.0425323	0.0551111
YGL156W	AMS1	U	-0.0390717	-0.017598	-0.485635	-0.297338	-0.677315	-0.0129992
YJR047C	ANB1	D	-0.207119	-0.357416	-0.999709	-0.171752	1.161	-0.868961
YPR128C	ANT1	U	2.25887	1.1042	1.89688		1.31978
YPR128C	ANT1	D	0.470388	1.60161	-0.454338	-0.250522	0.672816	0.224567
YCL050C	APA1	U	0.137731	0.670046	1.01404	0.174974	-0.534214	0.724718
YDR530C	APA2	U	0.767526	0.805911	-0.520564		-0.558233	-0.0540738
YDR530C	APA2	D	0.592697	-0.797123	-0.612008	-0.0704504	-0.0531624	-0.622068
YLR102C	APC9	D	-0.432606	-0.767815	0.579028	-0.0779758	-0.129849	-0.694337
YLR102C	APC9	U	0.449227	0.749481	0.633955	-0.763208	0.39102	-0.204787
YBR151W	APD1	D	-0.22578	-0.487914	-0.193962	-0.588638	-0.0872036	0.476883
YBR151W	APD1	U	-0.181581	0.91405	-0.330483	-0.554462	-0.723194	0.553896
YKL157W	APE2	D	1.7187	1.43467	0.495605	0.568825	0.258946	-0.168018
YKL157W	APE2	U	-0.339889	0.559135	0.234474	0.803851	-0.0769675	0.557974
YBR286W	APE3	D	0.506226	0.651069	1.2165	1.36763	0.0627849	0.816593
YBR286W	APE3	U	0.786442	1.44563	1.91825	1.08902	0.472771	1.61963
YNL077W	APJ1	D	-0.278839	-0.429417	0.0602479	1.47828	2.25218	0.846458
YNL077W	APJ1	U	0.936174	0.161301	1.29828	1.75171	0.657772	1.86855
YJR005W	APL1	D	-0.436177	0.903911	0.41572	-0.303998	0.320694	-0.823478
YJR005W	APL1	U	-0.0141342	-0.734856	0.526539	0.5385	1.08593	0.238976
YBL037W	APL3	D	-0.931127	0.330467	-0.265473		0.460543	1.02684
YBL037W	APL3	U	-1.21605	0.774064	-0.428276	-0.884221	0.178444	0.624992
YPR029C	APL4	D	-0.36838	-1.79124	-0.0291029	1.4649	0.509865	0.571402
YPR029C	APL4	U	-0.141065	-0.716528	-0.309072	0.242422	-0.722119	0.809707
YPL195W	APL5	D	0.933835	-1.78801	0.32762	-1.33475	-2.14156
YPL195W	APL5	D	0.454855	-1.22139	0.00255517	-0.727896	-1.71489	-1.73207
YPL259C	APM1	U	0.579223	0.578113	1.27486	0.00542006	1.00073
YPL259C	APM1	D	0.596655	0.570655	1.75553	0.469112	-0.0215523	-0.738358
YHL019C	APM2	U	-0.194258	-0.255107	-0.500481	-0.521858	-2.0519	-0.0950898
YBR288C	APM3	D	0.310156		2.61439	0.155597	2.24588
YBR288C	APM3	U	0.298058	0.307865	-0.77991		-1.73726
YOL062C	APM4	D	-1.42098	-0.158631	0.366565	0.773518	0.932005	0.352652
YOL062C	APM4	U	-0.195032	-0.061135	0.678414	-0.785391	0.596293	-0.22876
YBL019W	APN2	U	-0.992372	-1.21742	-0.359462		-1.1155	0.329361
YBL019W	APN2	D	-0.220578	0.367933	2.46287	-1.26028	0.40313	0.318124
YNL094W	APP1	U	0.395458	0.36145	0.239916	0.280638	-0.153847
YLR170C	APS1	D	-0.586657	0.133021	-0.166216	-0.0967751	0.374911	0.00591336
YLR170C	APS1	U	0.699293	0.0921365	0.808713	0.96509	-0.276972	0.0570302
YJR058C	APS2	D	-1.2261	0.0560389	0.594336	-0.207615	0.15356	-0.484531
YJR058C	APS2	U	0.746672	0.411238	0.3933	-0.926302	1.21603	0.569572
YJL024C	APS3	D	0.575178	0.379494	0.39322	-0.564051	0.338625	-1.76587
YJL024C	APS3	U	0.0816139	0.534529	-1.57191	-0.627467	-0.766665	-0.642323
YML022W	APT1	D	-1.59242	0.811285	-1.54195	-3.07412	-1.43737	-1.97463
YML022W	APT1	U	-1.11913	-0.551906	-1.56641	-2.58099	-0.594439	-1.9306
YDR441C	APT2	D	-2.12938	-0.841644	0.0996804	-0.667506	0.55606	0.306327
YNL065W	AQR1	D	0.00582941	-0.898082	0.477278	1.14056	0.110403	0.682987
YNL065W	AQR1	U	0.219047	0.0821744	-0.457183	0.103859	-0.411359	-0.56599
YPR192W	AQY1	D	-0.138249	0.967169	-0.182512	0.436963	0.215336	0.748997
YPR192W	AQY1	U	0.919987	-1.76751	0.863695	1.00697	1.18995	1.93792
YLL052C	AQY2	D	0.0359843	0.406031	0.400943	-0.340751	-0.170641	-0.217591
YLL052C	AQY2	U	0.218296	-0.248044	0.200805	-0.228012	0.240523	-0.0374363
YBR149W	ARA1	D	-0.315919	-1.73524	0.690252	0.335896	0.945984	0.376431
YCR048W	ARE1	D	-0.0151927	0.405325	0.787448	-0.557886	-0.204806	-0.434881
YCR048W	ARE1	U	-3.66084	-4.02488	-4.00332	0.876517	-3.24427	0.787804
YCR048W	ARE1	U	-4.28139	-2.88955	-4.25417	0.615203	-3.56997	-0.218204
YNR019W	ARE2	D	-0.332978	-0.359522	-1.07166	-0.0926912	-0.213232	0.6651
YNR019W	ARE2	U	3.03335	2.92309	2.10296	2.347	1.37917	2.18152
YDL137W	ARF2	D	-0.356206	-0.671005	-0.941321	-0.600673	-0.429306	0.700864
YDL137W	ARF2	U	0.0713541	0.822544	0.146085	-0.875108	0.556834	-0.50623
YOR094W	ARF3	D	-0.487525	-0.814842	-0.282717	-0.283014	0.2517	-0.146548
YOR094W	ARF3	U	-0.17593	0.30335	-0.295496	0.00360198	0.245778	0.510765
YOL058W	ARG1	D	-1.5203		-2.49001		-3.51422
YJL071W	ARG2	U	-1.41586	-0.47671	-2.38023	-2.23845	-2.83988
YJL071W	ARG2	D	-2.21892	-4.17871	-1.76608	-1.97869	-2.3235	-2.79858
YHR018C	ARG4	D	-6.05653		-5.39586	-3.36879	-7.01586	-6.66258
YMR042W	ARG80	U	-0.140679	-0.197481	-0.33683	0.151674	-0.388273	0.0771182
YML099C	ARG81	D	-0.189694	0.47638	-0.167208	0.784628	-0.773574	1.02604
YML099C	ARG81	U	0.0824908	-0.258887	0.106156	-0.141657	0.0834648	-0.682851
YNL020C	ARK1	D	-0.369098	0.865387	-0.146412	-0.137088	-0.481968	0.34865
YNL020C	ARK1	U	0.244335	-0.147791	-0.121591	0.588447	0.0415094	-0.108874
YBR164C	ARL1	U	-3.55208	-0.621204		-2.55152	-5.54223
YPL051W	ARL3	D	-0.349498	0.291387	-2.39484	0.744278	-3.64347	-0.797929
YHL040C	ARN1	D	-0.246148	0.0863062	-0.221915	-0.870191	0.325902	-0.621523
YHL040C	ARN1	U	-0.621533	-0.659049	-0.336381	-0.212802	-0.372448	0.407519
YHL047C	ARN2	D	-0.204231	0.772312	0.90228	0.330452	0.18481	-0.396235
YHL047C	ARN2	U	-0.589748	-0.640691	-0.710055	0.112912	-1.43569	-0.443717
YDR380W	ARO10	U	-0.623701		-0.792676	0.411312	1.35929	-0.28421
YDR380W	ARO10	D	-0.717875	-0.13114	-0.915686	-0.138157	0.16654	0.170455
YDR035W	ARO3	D	0.630686	-0.963322	-0.559057	-0.35789	-0.0629658	-0.455634
YDR035W	ARO3	U	0.162962	0.0736391	0.152686	-0.633224	0.363953	-0.127537
YBR249C	ARO4	D	-0.264851	0.468161	-0.29751	-0.970819	0.226806
YBR249C	ARO4	U	0.177232	-0.360627	0.448834	-0.0623065	0.870302	0.567706
YGL202W	ARO8	U	1.18381	0.298139	0.309087	0.0631836	0.335286	-0.0794367
YDR421W	ARO80	U	-1.12969	-0.225777	-0.375119	0.186563		0.744584
YDR421W	ARO80	D	-1.34492	-0.452223	-0.705319	0.30173	-0.322427	0.468767
YDR421W	ARO80	U	-1.87165	0.480862	-0.903972	1.28455	-0.719405	0.857191
YHR137W	ARO9	D	-0.765219	-0.182305	0.160953	0.224516	-0.0436464	-0.323451
YHR129C	ARP1	D	-1.96262	3.471	-0.0543082
YHR129C	ARP1	U	-1.39332	0.85188	-1.3459	0.799927	-3.78352
YLR085C	ARP6	U	1.70702		0.655969	-0.540282	1.6103
YLR085C	ARP6	D	2.78919	-0.516821	-1.01445		1.68514	0.519145
YOR141C	ARP8	U		2.62229	0.787261			0.104933
YPR199C	ARR1	D	-0.461246	0.0584766	-0.662737	0.415914	-0.834499	1.27512
YPR199C	ARR1	D	0.741024	-0.0231967	-0.0484479	0.83553	-0.514623	1.618
YPR199C	ARR1	U	-0.0381865	-0.262153	-0.0283794	0.914511	-0.241234	-0.215927
YPR200C	ARR2	D	-0.257275	0.282107	-0.882634		0.0216	0.574675
YPR200C	ARR2	D	0.22515	-1.12984	-0.615989	0.0955626	0.531813	0.514094
YPR200C	ARR2	U	2.0887	0.33295	1.52524	2.13061	1.41566	1.35333
YPR201W	ARR3	D	-0.206941	0.738335	-0.340178	0.291378	-0.113432	-0.634341
YPR201W	ARR3	U	0.654465	-0.0435815	0.142347	0.522234	-0.0973313	-0.41906
YOR058C	ASE1	D	-0.83171	0.452971	0.316594	-0.71478	-0.813362	-0.0554761
YOR058C	ASE1	U	0.468233	-0.316029	0.790917	-0.14245	1.15687	-0.979747
YDL197C	ASF2	D	-0.133764	-0.0722903	-0.641235	-0.47865	-0.476292	-0.491649
YDL197C	ASF2	U	0.341991	-0.428218	0.14159	0.0512921	0.622392	-0.652566
YIL130W	ASG1	D	0.565392	-0.189896	0.0999423	-0.399015	0.0656404	-0.0295375
YIL130W	ASG1	U	-0.694176	-0.45106	-0.507433	-0.359053	-0.581823	0.408114
YJL170C	ASG7	D	0.751422	-0.0884358	0.428177	0.153196	0.0549267	-0.960391
YKL185W	ASH1	D	0.439307	0.772551	0.167748	0.228085	1.31744	0.174562
YKL185W	ASH1	U	-0.695666	-0.334132	-0.223977	0.579554	1.2163	0.50921
YNL159C	ASI2	D	-0.455231	0.86676	-0.426708	-0.00646453	0.216085	-0.25372
YNL159C	ASI2	U	-0.108786	-0.424394	0.174085	-0.105963	0.43672	-0.92595
YGR097W	ASK10	U	-0.0398279	2.36939	-1.99742	0.904087	0.455819	1.07165
YDL088C	ASM4	D	1.63539	2.45953	1.87758	-0.478859	2.21005	-0.573545
YPR145W	ASN1	U	1.50737		0.394465	-0.00476621	0.274494	0.681116
YPR145W	ASN1	D	6.79671e-05	-0.102894	-0.260415	-0.143897	-0.236249	-0.118277
YPR145W	ASN1	D	0.384271	-0.122875	-0.495128	-0.074362	-0.155844	-0.520207
YGR124W	ASN2	U	1.02169	0.00117407	-0.0459912		0.720742	-0.0854777
YGR124W	ASN2	D	0.947309	0.584535	-0.228479	-0.0562097	0.0665799	-0.117964
YDR321W	ASP1	D	-0.00375956	-0.844343	0.36582	-0.224988	0.536515	0.973972
YDR321W	ASP1	U	-0.455756	0.818279	-0.323886	-0.266983	0.657664	0.924265
YPR093C	ASR1	D	0.0498622	-0.525334	1.21414	0.143428	0.342944	-0.198237
YPR093C	ASR1	U	-0.420829	-0.333588	-1.86503	-0.404291	-0.248559	0.124648
YBL069W	AST1	D	0.437535	-1.27191	-0.683449	-0.868569	0.297571	0.399677
YBL069W	AST1	U	-0.728069	-1.26203	-0.915916	-0.186271	-0.332624	0.262853
YER101C	AST2	D	-0.761906	0.432555	-0.555541	0.333214	-0.791693	-0.217982
YER101C	AST2	U	-0.0142901	-0.985619	-0.889488	-0.502596	0.264902	0.607079
YDR184C	ATC1	D	1.16777	1.92715	-0.0245851	0.39877	-0.473636	-0.594829
YGL017W	ATE1	D	0.438616	0.317282	-0.055952	-0.794383	0.177627	-0.553498
YGL017W	ATE1	U	-0.0654012	-0.325244	-0.267467	-0.501235	-0.434566	0.0159054
YOR377W	ATF1	D	-0.545623	0.915874	-0.974653	-0.311162	0.476457	-0.302662
YOR377W	ATF1	U	0.530319	-0.342939	-0.128059	-0.880739	-0.366829	-0.610324
YGR177C	ATF2	D	0.0138406	-0.367635	-0.48572	-0.669456	-0.228723	-0.00599706
YGR177C	ATF2	U	1.11502	0.836306	1.09661	-0.268617	1.39713	0.611145
YGL180W	ATG1	U	-1.48649	-2.30749	-4.23908	-2.35982	-2.7419
YLL042C	ATG10	D	0.218883	0.189826	-2.63209	-4.34075	-4.81474	-3.84136
YLL042C	ATG10	U	-1.1431	-1.92722	-2.14651	-4.71209	-3.54596	-4.92422
YPR049C	ATG11	D	-1.44957			0.194046	1.26422
YPR049C	ATG11	D	-0.781555		-0.453582	0.438826	0.349847
YBR217W	ATG12	D	-0.104395	-0.940874	-1.11093		-3.26589	-4.82786
YBR217W	ATG12	U	-0.239374	-0.405679	-1.67725	-3.57222	-2.91176	-5.64516
YPR185W	ATG13	D	0.591864	0.854865	-1.33657	-2.30855	-3.89948
YPR185W	ATG13	U	0.153735	-1.05092	-1.20705	-3.2763	-4.79944	-3.76121
YBR128C	ATG14	D	-0.310102	0.720031	-1.31479	-0.985132	0.207945	-0.143775
YBR128C	ATG14	U	0.812281	0.0194247	0.0289653	-1.6935	1.08787	1.08608
YMR159C	ATG16	D	0.00528199	-1.29116	-1.65223	-3.64451	-3.87401	-4.58491
YMR159C	ATG16	U	-0.391001	-0.706796	-1.69985	-3.77315	-3.79606	-5.75713
YFR021W	ATG18	U	1.10369	-0.0229325	-2.41025		-4.20321
YFR021W	ATG18	D	1.74383	-2.01625	-1.73808	-5.23805	-7.14421
YOL082W	ATG19	D	0.391062	-0.525247	0.107585	0.371477	-0.380336	0.360129
YOL082W	ATG19	U	-0.520715	-1.49908	-0.245347	0.826761	-0.129524	-0.00852655
YNL242W	ATG2	D	0.277468	0.837975	-2.42131	-3.02667	-4.85001	-5.64195
YNL242W	ATG2	U	-0.238934	0.209943	-1.79179	-3.5183	-5.18232	-6.07774
YDL113C	ATG20	D	-0.817992	-1.26271	-0.0346703	-0.394301	0.433724	-0.184907
YPL100W	ATG21	D	-0.598499	0.696892	0.193752	-0.629578	-0.170306	-1.43564
YPL100W	ATG21	U	-0.471686	-0.157112	0.146482	0.760813	0.0241379	-0.08033
YCL038C	ATG22	D	0.0635688	0.103492	-0.500576	-0.0458451	-0.350621	-0.585792
YCL038C	ATG22	D	-0.0745644	-0.52288	-0.982211	-0.568819	-0.604777	-0.0738467
YCL038C	ATG22	U	-1.90536	-0.801601	-2.52001	0.174615	-3.23124	-0.40969
YCL038C	ATG22	U	0.507209	0.436846	0.727153	-0.14045	0.596675	-0.480545
YCL038C	ATG22	U	2.89321	0.803456	2.46664	-0.0660231	2.47727	-0.639763
YLR431C	ATG23	D	-0.688582	-0.155318	0.134876		-0.467172	-0.19472
YLR431C	ATG23	D	-1.31697	-0.223983	-0.72483	-0.212195	-1.16828	-0.349084
YLR431C	ATG23	U	-0.451863	-1.38462	-0.478311	-1.13041	-0.273382	-0.52785
YLR189C	ATG26	D	-0.409753	-0.0332953	0.0256253	-0.0812512	0.532919	0.0425702
YLR189C	ATG26	U	-0.262486	0.0280383	0.597577	-0.00287579	0.190185	-0.0859579
YJL178C	ATG27	D	0.121624	-1.17854	-0.0902156	-0.798764	-0.203938	-1.57503
YJL178C	ATG27	U	-0.433921	-2.19534	-0.607784	0.0881924	0.417616	-0.512209
YPL166W	ATG29	D	-0.0879323	-0.677183	-0.639776	-3.31296	-4.20375	-4.29871
YPL166W	ATG29	U	-0.121423	-0.00919044	-1.44449	-4.48522	-3.72001	-4.84821
YNR007C	ATG3	D	0.391541	-1.70427	-2.83082	-4.19299	-4.56429
YNR007C	ATG3	U	-0.66276	-0.0342543	-1.78438	-6.19472	-4.43826
YPL149W	ATG5	D	-0.308779	0.29163	-2.36164	-2.72373	-2.67576	-4.49996
YPL149W	ATG5	U	-1.10974	-1.7901	-2.30106	-3.49093	-4.17207	-5.07507
YHR171W	ATG7	D	-1.17564	-0.70961	-1.75895	-3.74416	-5.27	-4.67088
YHR171W	ATG7	U	-0.26013	0.165152	-2.63601	-4.97546	-3.16046	-3.86695
YBL078C	ATG8	D	-1.00574	-1.64352	-2.66424	-3.61145	-3.99769	-3.75469
YBL078C	ATG8	U	-0.999753	-0.8143	-2.78921	-5.36842	-3.463	-5.47584
YDL149W	ATG9	D	-0.618878	-1.24161	-2.09813	-4.35479	-4.15643	-4.56239
YDL149W	ATG9	U	0.0610627	-0.7468	-2.1589	-4.43993	-3.66037	-5.70603
YPR026W	ATH1	D	0.0501308	0.0666467	0.0892884	0.0741484	-0.333121	0.219195
YPR026W	ATH1	U	-1.32537	-0.259849	-1.03981	0.0704121	-0.283323	0.501726
YNR002C	ATO2	D	-0.722018	-0.293562	-0.210583	0.00285301	-0.304508	0.625191
YNR002C	ATO2	U	0.0716642	0.128283	0.385811	-0.34105	0.0757377	-0.334871
YDR384C	ATO3	D	-0.439602	-0.30461	-1.58664	-0.479108	-0.514376	0.0999341
YDR384C	ATO3	U	-0.443429	0.362487	-0.339489	-0.581615	0.0497866	-0.0451167
YML081C-A	ATP18	D	2.69519	0.900606	-0.513574	-0.160922	0.350689
YML081C-A	ATP18	U	1.33061	1.11061	-0.801388	0.387683	-1.23997	0.0698239
YJR121W	ATP2	D	-0.493968		1.66407		0.0414028
YJR121W	ATP2	U	3.28755	2.75647	1.66722		1.95101
YPR020W	ATP20	D	0.988021	1.53265	0.392792	2.33849	-0.380894	0.393711
YPR020W	ATP20	U	1.09575	-0.848397	-0.940934	1.02963	-0.0965749	0.24512
YML116W	ATR1	D	0.328395	0.272542	-0.291488		0.727208	0.261809
YML116W	ATR1	D	0.505462	-0.742952	-0.179926	-0.0202358	0.522292	-0.0913869
YML116W	ATR1	U	0.823921	0.606368	1.31686	0.267078	1.37608	-0.145123
YNL259C	ATX1	D	0.505292	-0.426659	1.27096	1.65848	-0.303358	-0.512962
YNL259C	ATX1	D	0.552824	0.0797896	0.41514	0.883243	-0.155094	-0.538838
YNL259C	ATX1	U	0.289013	0.120388	0.55995	-0.174936	0.366722	0.1006
YOR079C	ATX2	D	0.394713	0.145727	-0.248247	-0.230962	-0.0979086	-0.589267
YOR079C	ATX2	U	0.581965	0.198256	-0.026613	0.319515	0.0421564	0.442515
YFL010W-A	AUA1	D	0.285165	-0.0430355	0.545107	3.60526	0.1013	0.632077
YFL010W-A	AUA1	U	1.37523	-1.5574	-0.120505	0.204143	0.911192	0.20813
YOR011W	AUS1	D	0.0743571	0.47603	0.0269562	0.0901642	0.689779	-0.0271453
YOR011W	AUS1	U	-0.84781	-0.111169	-0.226527	-0.523432	-0.217692	-0.431947
YLR114C	AVL9	D	-1.20683	0.2844	0.185625	0.256588	0.325717	0.317334
YLR114C	AVL9	U	-3.14006	-0.523094	-1.70193	-0.750976	-1.32483	-0.832716
YMR068W	AVO2	U	0.251838	0.59894	-0.522784	0.750771	-0.207788
YMR068W	AVO2	D	0.171102	0.402358	0.358985	0.563337	0.409259	-0.233942
YJR001W	AVT1	U	1.56923	1.32464	1.60412		1.81	-0.335799
YJR001W	AVT1	D	-0.353118	-0.10372	0.473226	0.301508	0.178249	-0.0143995
YEL064C	AVT2	D	0.246753	0.448196	-0.185421	-0.446414	1.06528	-0.081324
YEL064C	AVT2	U	-0.526915	0.476133	-0.741845	-0.695631	-1.02444	0.111759
YKL146W	AVT3	D	0.922401	-0.427658	0.275681	0.284609	-0.316532	-1.00822
YKL146W	AVT3	U	-0.264334	0.417819	-0.448335	0.178938	-0.496698	-0.469782
YNL101W	AVT4	D	-0.0430811	-0.0782318	-0.470074	2.07448	-0.347245	3.78627
YNL101W	AVT4	D	0.0317276	-0.9616	-0.393673	1.46949	-0.299125	2.05407
YNL101W	AVT4	U	0.373696	0.290502	0.441541	-0.19183	-0.113943	-0.629626
YBL089W	AVT5	D	-1.43162			-2.10276		1.33698
YBL089W	AVT5	U	-1.67355	-0.307241	-0.630776	-1.27701	-0.277249	0.149191
YER119C	AVT6	D	-0.282687	0.327511	1.1879	-0.315616	0.374528	-0.697788
YER119C	AVT6	U	-0.920544	0.785913	-0.583891	-0.00454911	-0.598302	0.0441424
YIL088C	AVT7	D	0.471772	0.240489	0.158822	0.128454	-0.256307	-0.712139
YIL088C	AVT7	U	0.673046	1.18494	0.570061	0.144321	0.761192	-0.387406
YPR122W	AXL1	D	-0.0893465	0.251441	1.10261	-0.131632	0.469928	0.234615
YPR122W	AXL1	U	-0.172295	1.46311	1.20607	0.345855	-0.15866	0.231959
YIL140W	AXL2	U	0.149762	0.207737	-1.07987		-0.0567615	-0.142674
YIL140W	AXL2	D	-0.508447	-0.532689	0.348085	-0.305762	-0.576336	-0.106242
YIL124W	AYR1	D	-0.604298	-0.29414	0.104811	-0.842193	-0.803638	-1.70349
YIL124W	AYR1	U	-0.77423	0.172103	-0.487513	-0.394201	-1.07945	-0.0661081
YLL063C	AYT1	D	-0.0623272	0.200546	0.154909	0.380296	0.525178	-0.94288
YLL063C	AYT1	U	1.24789	-0.166195	1.04308	1.24081	0.94128	1.25498
YOR113W	AZF1	D	-1.32521	-1.33573	1.10402	-0.531423	0.14109
YOR113W	AZF1	U	-3.13316	-0.365929	-0.961572	-0.145845	-0.11007	-1.33034
YGR224W	AZR1	D	0.156548	0.0893838	-0.153282	0.154559	-0.572543	0.545256
YGR224W	AZR1	U	-0.56019	-2.50005	-0.585008	-0.0082931	-1.02842	-0.392456
YOR134W	BAG7	D	0.607319	0.529582	-0.288784	-0.236314	0.461461	-0.733975
YDR046C	BAP3	D	-0.162867	-0.236911	0.368592	-0.487555	0.480528	-0.837964
YDR046C	BAP3	U	0.0445041	0.0169409	0.90663	-0.581757	0.627068	-0.8043
YIL015W	BAR1	U	1.4639	1.09282	2.10486		0.758228	-0.0396007
YIL015W	BAR1	D	0.828481	0.0170168	0.860242	0.588259	-0.224792	-0.0404533
YIL015W	BAR1	U	1.07143	0.722106	1.13974	0.905835	0.335015	0.423216
YKR099W	BAS1	U	-0.285468	-1.09849	-0.21251	-1.50334	-0.357197	-1.28816
YJR148W	BAT2	D	-1.31278	-0.524993	0.200842	-0.0985615	-0.187559	0.254768
YJR148W	BAT2	U	-0.331985	0.492405	0.566658	-0.724357	0.873152	0.644028
YJL020C	BBC1	D	0.228478	0.820387	0.199286	0.604677	0.404022	-0.884447
YJL020C	BBC1	U	0.747809	0.787772	0.705354	0.588402	1.10404	0.460838
YMR237W	BCH1	D	-0.185145	0.520566	-0.203536	-0.0329406	-0.462688	-0.466562
YMR237W	BCH1	U	-1.38092	0.00424377	-0.440316	-0.334237	-0.950641	0.169769
YJL095W	BCK1	D	-0.635573	3.75887	2.39877		1.49623
YER167W	BCK2	D	-3.13633	0.0254849	-0.178144	0.751963	0.513004	0.976154
YER167W	BCK2	U	-0.96674	-0.902079	-0.750547	1.08388	0.408328	0.0913639
YDR375C	BCS1	U	0.474068	2.43323	1.99994		0.626078
YDL070W	BDF2	D	0.383057	-0.265057	-0.262183	-1.54325	-0.744733	1.10983
YAL060W	BDH1	U	-0.28404	-0.334557	-0.0998733	0.234214	-0.063628	-0.377458
YPL115C	BEM3	D	0.715366	-0.694121	0.055968	2.62545	-0.542614	0.429355
YPL115C	BEM3	U	0.606491	-0.166989	0.906736	-0.818001	0.00661629	0.375602
YJR053W	BFA1	D	0.521963	-0.15284	-0.18835	-0.26706	0.422379	0.768427
YJR053W	BFA1	U	0.00618235	-0.480999	0.0137996	-0.601725	1.03615	-0.7063
YGR282C	BGL2	U	3.69829		0.0141458		-0.196919	0.333714
YGR282C	BGL2	D	0.335858	-0.12497	-0.309924		-2.84022	0.643974
YGR286C	BIO2	D	0.0473004	-0.0621441	-0.214554	0.355866	-0.287637	1.07631
YGR286C	BIO2	U	0.0967499	-0.573773	-0.161334	-0.0364739	0.477027	0.198971
YNR058W	BIO3	D	-0.448605	-0.07422	0.179568	0.0960017	0.133073	-0.269831
YNR058W	BIO3	U	0.17345	0.425405	0.582866	-0.166098	0.945262	-0.138613
YNR057C	BIO4	D	-0.178276	-0.743792	-0.696587	-0.025141	-0.36915	-0.357975
YNR057C	BIO4	U	0.306865	-0.319025	0.491639	0.180304	0.715344	-0.369191
YNR056C	BIO5	D	-0.20205	-1.16442	0.149674		0.00476356	-0.328995
YNR056C	BIO5	D	-0.277273	-0.928544	-0.253405	-0.0617446	0.0913908	0.00337308
YNR056C	BIO5	U	-0.0282348	0.0412999	0.648759	-0.481463	0.280467	-0.494155
YBR270C	BIT2	D	0.101262	0.109636	-0.247712	0.0147879	0.484234	-0.591544
YBR270C	BIT2	U	0.0259667	0.575395	0.742159	0.0298702	0.307358	-0.138728
YJL058C	BIT61	D	0.526891	-0.149695	0.133648	0.419273	-0.686112	-0.249307
YJL058C	BIT61	U	-0.729416	-0.160146	-0.683446	0.0222656	0.451873	0.272814
YFL007W	BLM10	D	0.403307	0.946945	1.37293	6.34894	-0.646378
YFL007W	BLM10	U	-0.024167	0.527665	0.277838	0.785769	-0.23669	-1.12828
YER177W	BMH1	D	-4.51701		1.64757	1.0764	2.1092
YER177W	BMH1	U	-7.30425	-5.85618	1.06989	-0.411745	-0.511879	0.880968
YDR099W	BMH2	D	-2.53061	-1.14232	-0.760061	-0.165319	0.874923	-0.0592647
YDR099W	BMH2	U	-0.442816	-0.146232	1.20973	-0.269381	1.05742	0.0930901
YJR025C	BNA1	D	0.00142622	-0.111105	-0.367002	-0.1848	0.108828	-0.538197
YJR025C	BNA1	U	-0.677125	-0.489932	0.165412	-1.10005	0.347129	-0.361756
YJR078W	BNA2	D	1.06288	0.240452	1.18423	0.653594	1.13885	-0.359658
YJR078W	BNA2	U	0.357136	-0.737053	0.542207	0.00423385	0.600759	-0.609978
YJR078W	BNA2	U	0.020845	1.35581	-0.00758979	0.387652	0.793302	1.01468
YJL060W	BNA3	D	0.495375	-0.00860539	-0.287855	-0.24013	0.0570107	0.595254
YJL060W	BNA3	U	-0.226766	-0.757552	-0.796111	-0.758673	0.187603	0.197734
YBL098W	BNA4	D	-0.879018	-0.904313	-1.16808		0.855428	-0.202014
YBL098W	BNA4	U	-0.41897	-1.32092	-0.00995577	0.0788053	0.0384869	0.45162
YLR231C	BNA5	D	-0.306263	-0.162509	0.876132	0.178219	1.0026	0.198108
YLR231C	BNA5	U	-0.450422	-0.231795	-1.82589	0.377745	-1.305	0.410153
YFR047C	BNA6	D	-0.521372	-0.635583	0.150141	-0.646274	-0.989422	-0.469899
YFR047C	BNA6	U	0.255131	-0.593712	-0.470714	0.0683409	-0.336157	-0.406576
YNL233W	BNI4	D	-1.62041		0.223452	1.02878	1.82509
YNL233W	BNI4	U	-0.345983	-0.247645	-1.37301	0.300783	-0.558468	0.39493
YIL159W	BNR1	D	-0.977267	-0.929971	0.23562	-0.150311	-0.0145082	0.228839
YIL159W	BNR1	U	0.825059	-0.00924293	0.588295	0.930361	0.456743	1.15182
YGR230W	BNS1	D	0.550213	-0.393034	0.319735	-0.0961354	0.128658	-0.0659144
YGR230W	BNS1	U	-0.12953	-1.22939	-0.156274	-0.0326643	-0.279102	0.287159
YBL085W	BOI1	D	0.330877	1.07068	0.592665	-1.44625	0.455534	0.410093
YBL085W	BOI1	U	-0.32795	0.529957	0.360989	0.102851	0.144439	0.2016
YER114C	BOI2	D	-0.0747702	0.446792	0.0697368	-0.102647	-0.206157	0.353353
YER114C	BOI2	U	-0.645948	-1.27233	-1.00034	0.93919	-1.23078	0.990048
YLR267W	BOP2	D	0.540966	2.35323	1.52131	0.83658	1.36291	0.262245
YLR267W	BOP2	U	-0.0394785	-0.40345	0.375523	-0.107118	0.107831	-0.0519788
YNL275W	BOR1	D	0.0486021	0.435913	-0.759396	0.620948	-0.387774	0.852351
YNL275W	BOR1	U	-0.817139	0.0726894	-0.414809	-0.663964	0.301866	-0.107667
YCR032W	BPH1	D	0.0829343	0.941246	-0.0514453	-0.468581	0.740333	0.319754
YCR032W	BPH1	U	0.958141	0.229087	-0.45375	-0.149639	1.66393	1.76187
YLL015W	BPT1	D	1.19092	1.39156	0.653139	0.19332	0.649809	-0.738552
YLL015W	BPT1	U	-0.473021	0.321421	-0.628156	-0.065139	1.35362	0.884327
YDL231C	BRE4	D	-0.284756	-0.46153	-0.994528	-0.636223	-1.3062	0.417858
YDL231C	BRE4	U	-0.264563	0.0245733	-0.405114	-0.198491	0.399474	0.411994
YNR051C	BRE5	D	-1.47577	1.56226	-5.66046		-0.936795	-0.709832
YPL084W	BRO1	U	-0.323615	0.405957		-2.76932	-3.57486
YDL037C	BSC1	D	2.29146		0.964131		-0.399563	0.455302
YDR275W	BSC2	D	-0.811323	-0.434617	-0.902029	0.44735	0.773017	2.67714
YDR275W	BSC2	U	-0.647837	-0.469267	-0.116672	0.691944	0.00497922	-0.667021
YNL269W	BSC4	D	0.0306563	-0.750666	-0.0841979	0.103608	-0.16374	0.352852
YNL269W	BSC4	U	0.255181	0.423263	-0.490889	0.0590529	-0.171441	0.141458
YNR069C	BSC5	D	0.437945	-0.303733	0.101745	-0.132956	0.10206	0.353898
YNR069C	BSC5	U	0.508718	-0.0158244	-0.203116	-0.398551	0.105897	-0.664716
YOL137W	BSC6	D	-0.1128	0.824751	-0.154433	0.036218	0.578047	0.431663
YOL137W	BSC6	U	0.00825509	0.459511	-1.17905	0.52039	-0.176588	0.270109
YBR290W	BSD2	D	0.468878	-1.246	-0.961548	-0.00589798	-0.770898	0.740397
YBR290W	BSD2	U	0.389002	0.229106	0.654352	1.25653	-0.0619939	-0.53929
YPR171W	BSP1	U	0.0832981	-0.937451	0.632757	0.783551	-0.541466
YPR171W	BSP1	D	-0.598935	-0.411924	-0.335221	0.0143253	-0.203178	1.21256
YGR142W	BTN2	U	-0.561272	-0.905515	0.261322		1.28075	-0.109809
YGR142W	BTN2	D	0.858184	-0.664987	0.299628	-0.128452	0.253142	-1.12431
YDR252W	BTT1	D	-1.40099	-0.00904541	0.894941	-0.367989	0.416321	0.0590764
YDR252W	BTT1	U	0.103911	0.0957551	0.432289	0.113608	0.151363	0.389599
YGR188C	BUB1	D				-0.297164	-0.402936	0.055836
YMR055C	BUB2	D	-0.111551	-1.08069	-0.321938	-0.0461006	-0.49432	0.389316
YMR055C	BUB2	U	0.0896964	-0.145208	-0.125928	-0.455329	-0.0801175	0.468172
YAR014C	BUD14	U	1.99503	-1.51183	1.92869	-1.61447	2.21653	3.5606
YEL029C	BUD16	U	1.89514	2.86417	1.41772			-1.07702
YNR027W	BUD17	D	-0.887896	-1.00053	-1.16463	-0.419691	-0.654775	0.15965
YKL092C	BUD2	D	0.290589	0.952878	-1.04823	0.0803003	0.380461	-0.541358
YKL092C	BUD2	U	0.0386706	0.799717	0.319374	-0.195993	-0.634472	-0.247931
YCL014W	BUD3	U	0.465247		1.36912	-1.2156	0.99793
YCL014W	BUD3	D	-0.801227	0.246064	-1.1294	0.196499	-0.888331	-0.364435
YJR092W	BUD4	U	0.500091	0.554665	0.256	-0.434978	0.473847	-0.357716
YLR319C	BUD6	D	-0.00899415	0.782381	0.647896	0.633322	-0.871409	0.588977
YLR319C	BUD6	U	-0.822001	0.228092	-0.147738	0.897846	-0.640792	0.710843
YLR353W	BUD8	D	0.105389	0.799615	-0.410307	0.620441	0.436188	-0.185033
YLR353W	BUD8	U	0.161979	-0.66687	0.361255	0.440301	0.277416	0.466721
YGR041W	BUD9	D	-0.377563	0.213802	-0.485457	-0.0928254	-0.473869	1.06038
YDL099W	BUG1	D	0.568812	-0.567719	0.165091	0.764012	-0.105349	0.527597
YDL099W	BUG1	U	1.07027	0.124966	0.233353	1.01356	-0.306908	0.205213
YMR275C	BUL1	U	-0.340917	1.37222	1.3205		0.518447
YMR275C	BUL1	U	1.42747	3.34104	1.08064		1.12233
YMR275C	BUL1	D	0.259161	1.38559	-0.353171	-0.252458	0.855173	-0.0151989
YML111W	BUL2	D	0.987255	0.208456	0.592111	0.583231	1.15532	0.61596
YML111W	BUL2	U	0.491123	0.866114	0.805097	1.06563	1.40496	1.12248
YKL005C	BYE1	U	0.949568	0.61988	0.936485		0.753131	-1.04941
YKL005C	BYE1	D	-0.418287	-0.0250184	-0.587873	-0.16112	-0.0564049	-0.395562
YKL005C	BYE1	U	0.897073	0.669133	1.06683	-0.097196	1.01058	1.59262
YHR114W	BZZ1	D	-0.0766154	0.702157	0.0457993	0.320745	0.545257	-0.764449
YHR114W	BZZ1	U	1.22731	1.04155	0.954466	0.027407	0.43272	0.304223
YML102W	CAC2	D	1.60064	2.19518	2.16487	-1.2786	1.76345
YDR423C	CAD1	D	0.485094	0.911655	0.560968	-0.0618487	0.102799	0.463497
YDR423C	CAD1	U	0.109044	-0.585441	-0.15507	-0.603292	0.3186	0.50148
YNL278W	CAF120	D	-0.873711	-0.405524	-0.204528	-0.21709	-0.0829786	0.182088
YNL278W	CAF120	U	-1.25153	-0.571338	-0.646904	0.441098	-0.814099	0.177766
YGR134W	CAF130	D	0.115969	1.24173	0.207226	0.0903658	-2.0513	-0.342664
YGR134W	CAF130	U	0.552104	-0.680213	0.27115	0.135986	0.589895	0.559119
YFL028C	CAF16	D	0.0708802	0.0819162	0.640848	1.47602	-0.631264	0.69126
YFL028C	CAF16	U	0.943895	0.201974	0.0901296	-0.13639	0.670935	1.07582
YOR276W	CAF20	D	0.458773	-0.426245	0.0930454		-0.295316	0.746838
YOR276W	CAF20	U	-0.318441	1.12329	1.19581	1.79737	-1.2382	2.6102
YKR036C	CAF4	D	-0.570265	-1.39013	-0.330816	-0.761665	-0.519898	-0.70532
YKR036C	CAF4	U	0.584836	0.28033	-0.302934	0.196841	0.257238	-0.0584124
YNL288W	CAF40	D	-0.386069	-1.11339	-0.62641	-0.259567	-0.414098	-0.375526
YNL288W	CAF40	U	0.268802	-0.525792	-0.885633	-0.466351	0.166649	-0.447745
YER048C	CAJ1	D	0.392471	-0.346752	-0.0514944	0.202492	-0.164807	-0.43311
YER048C	CAJ1	U	-0.978725	0.259365	-1.37219	-1.77866	-0.512386	-0.813192
YPL048W	CAM1	U	1.41093	1.70332	0.251261		-0.590449	0.140951
YPL048W	CAM1	D	0.778807	-0.377184	0.00879129	0.0918929	0.557682	-0.275426
YEL063C	CAN1	D	1.29041	-0.505982	0.254745	-0.361294	1.27901	0.862734
YEL063C	CAN1	U	0.308234	-0.0589597	0.587222	0.21981	-0.145914	0.263344
YKL007W	CAP1	D	0.721239	-0.237141		-1.39957	0.589123
YKL007W	CAP1	U	-1.27153	-0.393611	0.172965	0.742316	1.11442	0.539
YIL034C	CAP2	D	-0.0375561	6.06199	4.52265		3.84109	-1.83929
YPL111W	CAR1	D	-0.225186	0.40814	0.314559	-0.16573	0.03369	-0.350355
YPL111W	CAR1	U	-0.33754	-0.324641	0.0564801	-0.425144	-0.533498	0.248348
YLR438W	CAR2	D	-1.12928	-0.917825	-0.450729	-0.183625	-0.0255568	-0.364027
YLR438W	CAR2	U	-0.467492	0.518044	0.349411	-0.302084	0.159922	-0.528109
YML042W	CAT2	D	-0.315957	0.825574	0.698818	0.190012	-0.086501	-0.388489
YML042W	CAT2	U	-0.218875	0.436409	0.46462	0.296978	-0.160529	0.494455
YMR280C	CAT8	U	0.104442	-0.776785	0.107263	-0.270524	-0.420345	-0.559903
YJR060W	CBF1	D	0.177032	-0.29411	0.388438		0.0315001	0.176533
YGR174C	CBP4	D	2.01187		-0.236596			0.164803
YGR174C	CBP4	U	0.399405	0.510735	-0.889393	0.409707	-0.502084	-2.04612
YBR120C	CBP6	D	-1.15229	0.0636981	0.514449	0.790788	-0.705521	2.4504
YBR120C	CBP6	U	0.261035	0.786579	0.724696	1.2336	0.576088	0.946291
YIL043C	CBR1	D	0.319995		0.658886	-1.30947	2.84602	0.704145
YIL043C	CBR1	U	0.440383	1.75453	0.335221	2.0463	-1.42662	2.42976
YLR220W	CCC1	D	-0.23797	-0.512885	-0.105646	0.414596	-1.00804	0.245231
YLR220W	CCC1	U	-0.664333	-0.432087	0.586496	0.22076	0.132469	0.357852
YDR270W	CCC2	D	-0.199151	1.50098	0.297151	0.404648	0.679651	0.389683
YKL011C	CCE1	D	0.245282	-2.48733	0.726812	0.105209	1.79554
YKR066C	CCP1	D	-0.890555	-1.39012	-0.582949	1.90727	0.0587575	2.49208
YKR066C	CCP1	U	0.86926	0.21302	0.109368	1.62272	0.586329	0.916622
YLR110C	CCW12	U	2.40819	0.857706	4.16738		4.02881
YLR110C	CCW12	D	1.76753	2.13163	3.15036		5.13694	1.14536
YLR110C	CCW12	D	1.5648	2.84222	3.8074	3.58679	3.75436	1.26901
YLR390W-A	CCW14	D	0.356553	0.656672	0.219689	0.191112	0.229569	0.0873515
YLR390W-A	CCW14	U	0.232699	-1.33619	-0.0814678	-0.231779	0.337745	0.248749
YLR307W	CDA1	D	1.00207		-1.82717	0.427041	0.0601196	0.0634152
YLR307W	CDA1	U	0.152039	-0.0672246	-0.572141	0.371708	-0.508762	2.10691
YLR308W	CDA2	D	1.51412	1.38112	0.212609	0.6447	1.64116	-1.05228
YCR094W	CDC50	D	1.45968	-3.19587	-2.6016	1.03091	0.434024	-1.88897
YCR094W	CDC50	U	0.967119	-1.00133	-0.453644	2.1084	-1.09615	-0.0639587
YCL064C	CHA1	U	0.403035	1.29978	1.27518		1.8275	2.24496
YCL064C	CHA1	D	-0.482376	-0.401244	0.129076	-0.44172	0.130204	-0.385551
YCL064C	CHA1	U	0.261451	-1.06198	-0.00277042	-1.12245	0.166688	0.42546
YLR098C	CHA4	D	-0.895038	0.257018	0.0453201	-0.254687	0.168907	0.603241
YLR098C	CHA4	U	-0.102666	0.463334	0.591072	-1.36042	0.998697	-1.05838
YER164W	CHD1	D	1.55821	-2.06056	0.273222	-0.481274	-1.2388	-1.52392
YER164W	CHD1	U	0.443228	0.450551	-0.0903292	-0.637482	-0.963486	-1.22684
YPL008W	CHL1	D	-0.244243	2.93802			3.08683
YDR254W	CHL4	D	-0.685562	0.652084	1.44541	0.150338	-0.24034	0.0279874
YDR254W	CHL4	U	0.647012	1.24826	0.103912	1.13758	-0.724013	1.71736
YGR157W	CHO2	D	-0.795612	-0.72109	-1.5178	-2.33358	-1.22205	-2.72657
YGR157W	CHO2	U	-0.678977	-0.499379	-1.23568	-2.70291	-0.786458	-3.07961
YBR023C	CHS3	D	0.512496	1.58609	0.502625	-0.486668	0.711168	0.476681
YBR023C	CHS3	U	-0.851407	-0.879364	-1.11404	-0.653628	-1.58782	-0.383126
YLR330W	CHS5	D	-9.61972	-0.28229	-5.14324	-7.8359	0.541954
YJL099W	CHS6	D	0.76555	0.798947	-0.340796	-0.588634	-0.0355715	-0.330199
YJL099W	CHS6	U	-0.254927	-0.435457	0.00703113	-0.376343	0.496827	0.0573972
YHR142W	CHS7	D	-3.15333		-4.07363		-0.454602
YHR142W	CHS7	U	-0.882338	0.85127			-0.496941
YER030W	CHZ1	D	0.992874		0.321716	-0.50982	0.712748
YER030W	CHZ1	U	0.472623	-0.195441	-0.442251	0.17159	0.991668	-0.940949
YPL241C	CIN2	D	-1.32485	1.21753			-2.28124
YPL241C	CIN2	U	3.23313		0.103032	1.05171	-0.744644	0.511483
YOR028C	CIN5	D	-0.638074	-0.100174	-0.510635	1.14738	-0.309571	1.5018
YOR028C	CIN5	U	0.948143	-0.109306	0.578506	0.051948	0.89756	-0.333233
YDR022C	CIS1	D	-0.412009	-0.777451	-1.37762	-2.58988	-2.41404	-1.64127
YDR022C	CIS1	U	0.316507	-0.861097	-0.523083	-4.14163	-1.98544	-3.31564
YJL158C	CIS3	D	1.78446	-0.19044	0.780032	1.33424	-0.421822	-0.509201
YJL158C	CIS3	D	1.04348	-0.449645	0.730017	1.25944	-0.311547	0.0716752
YJL158C	CIS3	U	-0.0837672	0.158565	0.0151733	-0.38648	-0.640948	-0.446964
YNR001C	CIT1	D	-0.480731	0.482594	1.35796	0.280291	0.0897332	0.0263645
YNR001C	CIT1	U	-1.45501	0.37407	0.013403	0.280596	-0.510216	-0.621755
YCR005C	CIT2	D	1.18413	1.06318	0.716577	-0.0838324	0.721296	-0.500193
YCR005C	CIT2	U	0.338083	-1.39025	0.11941	-0.458159	0.338337	-0.578814
YPR001W	CIT3	D	0.649429	0.710045	0.706307	0.365349	-0.0975883	0.51121
YPR001W	CIT3	U	0.10421	-0.370715	-0.133917	0.711516	0.656685	0.652147
YIL035C	CKA1	D	0.371254	0.461617	0.80206	0.280085	0.812628	-1.55438
YOR061W	CKA2	D	0.459543	0.517804	0.472593	-0.53267	0.380023	-1.59097
YOR061W	CKA2	U	1.24295	0.484158	1.33609	0.213446	0.454753	-0.900302
YLR133W	CKI1	D	-1.61746	0.548746	-0.70861		-0.918936	3.02574
YLR133W	CKI1	U	-0.341358	0.069896	-0.673964	-0.169853	-0.233361	0.597921
YGR108W	CLB1	D	1.13086	-0.81376	-0.0371972		-0.410398	-0.209995
YGR108W	CLB1	U	0.712678	1.23575	0.00694037	-0.145309	1.4294	0.232525
YPR119W	CLB2	U	2.04828	-0.480379	0.878426		1.43725	2.0647
YDL155W	CLB3	D	-0.49057	-0.170403	-0.159415	-0.120164	0.263895	0.315375
YDL155W	CLB3	U	0.481378	0.99918	0.799579	-0.166873	0.954018	0.108918
YLR210W	CLB4	D	0.527352	0.135829	0.222344		-0.0708222	0.17546
YLR210W	CLB4	U	-0.835725	-1.0939	-0.946428	0.0681667	-0.280775	0.431395
YGR109C	CLB6	D	-0.750663	0.745892	-0.121034	-0.292766	1.31792	0.707831
YGR109C	CLB6	U	0.172045	0.487989	-0.738647	0.46251	1.06305	0.342652
YGL215W	CLG1	D	-1.63931	2.78825			-2.0101	0.47583
YMR199W	CLN1	D	-0.947308	0.75496	0.645243	0.121426	1.41955	0.299732
YMR199W	CLN1	U	-0.422944	1.10864	0.495384	0.454697	1.04756	0.442592
YPL256C	CLN2	U	-0.733597	0.370437	-0.569429	-0.156504	-0.239492	-0.0768071
YAL040C	CLN3	U	-0.812912	1.01859	1.01618	3.5358	-1.17373
YMR012W	CLU1	U	0.65079	-0.529122	0.744805	0.043841	0.578802	-0.112743
YFR014C	CMK1	D	-0.322985	0.0800876	-0.295889	-0.294203	-0.567216	0.0678422
YFR014C	CMK1	U	0.945295	0.116674	0.700741	-1.24985	0.391726	-0.439233
YOL016C	CMK2	D	0.0904775	0.356931	0.168186	0.390747	0.748328	-0.593167
YOL016C	CMK2	U	-0.56256	0.115202	-0.440172	-0.589881	0.535672	-0.655434
YML057W	CMP2	U	-0.472634	0.141946	0.182902	-1.01802	0.257464	-0.290019
YLR433C	CNA1	D	0.0474878	0.476433	0.747282	1.01332	0.29744	-0.335587
YLR433C	CNA1	U	-0.0192753	-0.959529	0.0595298	-0.415136	0.0122197	0.269365
YKL190W	CNB1	D	-1.05361	1.63251	0.297035	-1.50117	-0.0971118	-1.1181
YKL190W	CNB1	U	-1.05147	-2.29384	-1.12439	-1.6764	0.11272	-2.644
YAL058W	CNE1	U	-1.09323	-1.32306	-2.5576	0.33686		-0.0768229
YFR046C	CNN1	U			-0.0035909	-1.35995		-0.857668
YFR046C	CNN1	D	0.216547	-1.2646	-0.787627	-0.116321	-1.00981	-0.075929
YML071C	COG8	D	-2.04393	-2.19327	1.74935	-0.484707	-4.96514
YML071C	COG8	U	-0.461227	0.431629	-3.15769	-0.506257	0.229617	-1.67504
YOL008W	COQ10	U	-1.39154	0.581112	1.24401	4.03104	-5.40997	-1.17161
YML110C	COQ5	U	2.54248	1.66133	1.83597		-2.57871
YBL045C	COR1	D	3.56909	2.68952	0.851002		-1.10716
YBL045C	COR1	U	1.54006	1.00996	-1.86326	-1.85713		0.950695
YNL336W	COS1	D	-0.913781	-0.868582	-0.202694	0.197826	-0.171497	0.189651
YNL336W	COS1	U	-0.0590205	-0.648156	-0.130367	-0.0845887	0.431145	-0.289551
YNR075W	COS10	D	-0.29934	-0.00167803	-0.591218	0.337221	0.0809811	0.0119532
YNR075W	COS10	U	0.0528587	-0.791046	-0.344315	0.771992	-0.343618	0.0380432
YBR203W	COS111	D	1.05348	1.27355	-0.546497	-1.41566	0.703853	0.286151
YBR203W	COS111	U	-0.0375366	-0.723636	-0.622915	-0.815767	-0.182603	0.0617611
YGL263W	COS12	D	-1.04333	-0.122916	0.0248011	-0.740937	0.175134	0.253908
YGL263W	COS12	U	-0.262741	-0.0816299	-0.525458	0.445766	-0.773663	0.93679
YGR295C	COS6	D	-0.474661	-1.3633	-0.195641	-0.797206	0.279291	0.725115
YGR295C	COS6	U	0.107374	0.719424	0.355413	-0.237094	0.646801	0.213499
YOR316C	COT1	D	0.357344	0.0239067	-0.0716328	0.432895	-0.0692586	-0.337707
YOR316C	COT1	U	0.088037	0.547695	-0.777645	-0.0789778	0.0195602	0.315948
YPL172C	COX10	U	-0.261761	5.22579	0.460385		-0.805117
YPL132W	COX11	D	0.482004		0.875521		-5.69965
YLR038C	COX12	U	0.969486	0.620161	0.50458		-0.638595	1.62732
YLR038C	COX12	D	1.79011	0.979786	-2.53257	0.899543	-0.923575	0.22197
YML129C	COX14	D	5.73007		0.906578		-0.10731
YER141W	COX15	U	0.0789589		1.25519		0.156264
YJL003W	COX16	D	-0.381058	-0.595165	-0.769773		-1.35682
YLL009C	COX17	U	2.11603	2.90102	-0.846167
YHR116W	COX23	D	1.9206		1.94049		1.60034	-0.733459
YNL052W	COX5A	D	0.255591	0.359085	-0.0509925	-0.477535	0.210626	0.239848
YNL052W	COX5A	U	1.12643	1.08319	0.668083	-0.274633	0.239709	-0.132343
YIL111W	COX5B	D	0.212712	0.943507	0.198948	0.20807	0.208157	-0.36243
YIL111W	COX5B	U	-0.236258	-0.448613	-0.77058	-0.236332	0.251265	0.32003
YLR395C	COX8	D	0.149138	-1.95843	-0.0057719		0.114972	-0.323629
YLR395C	COX8	U	0.023335	-0.0687304	-0.461833	-0.0445379	-1.95932	0.0037191
YKL179C	COY1	D	1.19408		-0.207065		1.61226
YKL179C	COY1	U	-0.187857	-1.54172	-0.516122	-0.242726	-0.353645	0.478372
YOR303W	CPA1	D	-0.187078	-0.0374478	-0.208646	0.115742	0.824614	0.447696
YOR303W	CPA1	U	-0.027765	-0.437745	0.197731	-0.0270681	0.410141	-0.337616
YJR109C	CPA2	D	0.0563195	0.16043	-0.246025	0.460071	-0.0641561	0.369004
YJR109C	CPA2	U	0.917785	0.208244	0.836105	0.124606	1.1768	-0.051411
YGR247W	CPD1	D	0.0331898	-0.739581	-0.89243	0.0289343	0.0084535	-0.209715
YGR247W	CPD1	U	-0.29671	-1.30861	-0.93742	0.973359	-0.242652	-0.273478
YDR155C	CPR1	U	0.437683	0.739704	1.10481	1.35423	0.284184	0.546746
YHR057C	CPR2	U	-0.169689	-0.426072	-0.357214	-0.186898	-0.310274	-0.500857
YML078W	CPR3	U	0.868604	-0.31904	0.405658	-0.202863	1.40199	0.239142
YCR069W	CPR4	D	-0.153193	0.101617	0.5596	0.136701	0.355467	0.483446
YCR069W	CPR4	U	0.393365	-0.68424	0.0639324	-0.0947063	0.363782	-0.124822
YDR304C	CPR5	D	1.08474	-0.150147	-0.752979	-0.0812904	0.519663	0.351411
YDR304C	CPR5	U	0.604664	0.104227	0.410032	-0.570754	0.398725	0.488889
YLR216C	CPR6	U	-0.0347828	0.217729	-1.09514	1.17525	-0.572068	1.3566
YJR032W	CPR7	U	0.306912		0.679587		0.668953
YNR028W	CPR8	D	0.901501	1.34436	1.62236	0.656004	0.836684	0.658649
YNR028W	CPR8	U	0.559838	0.475816	0.0759887	0.163882	0.427921	-0.660268
YJL172W	CPS1	D	-2.71275	0.42252	-3.16549	0.0225101	-1.60044
YJL172W	CPS1	U	0.650537		0.622283	0.210377	-0.296448	0.83251
YNL130C	CPT1	D	0.716515	-1.01846	-0.662605	-0.198487	-0.35011	-0.126229
YNL130C	CPT1	U	0.907659	0.56222	0.0445785	1.02023	0.60999	-0.619268
YOR100C	CRC1	D	-1.21107	-0.00210457	-0.19428	0.320464	0.00834267	-0.324726
YOR100C	CRC1	U	-0.538818	-0.0227811	-0.422023	-0.0363533	-1.67818	0.26096
YDL142C	CRD1	D	1.87336	0.73621	2.14402	1.10529	0.969552	0.0330486
YDL142C	CRD1	U	0.546109	-1.46253	1.88409	1.5653	1.41327	-0.0986347
YDR223W	CRF1	D	-0.142484	0.265059	0.2537	-0.169451	0.0206686	0.431427
YDR223W	CRF1	D	-0.656976	-0.0234997	0.511855	0.127885	0.0107466	0.640561
YDR223W	CRF1	U	0.301371	0.589128	0.872206	-0.279109	1.22011	-0.731452
YGR189C	CRH1	D	-0.200965	1.01564	1.50638	0.301909	-0.326135	-1.45252
YGR189C	CRH1	D	0.359235	-1.2116	2.18775	0.324342	0.147215	-0.318304
YGR189C	CRH1	U	0.295918	-0.43458	1.60692	-0.407605	1.23307	-0.284829
YLR429W	CRN1	U	-0.549188	-1.18813	-0.570725	-0.505685	-0.312682	-0.351309
YHR146W	CRP1	D	-0.454217	0.333649	0.632046	-0.179524	0.216077	0.110638
YHR146W	CRP1	U	-0.0935629	-1.14887	0.388661	0.414828	-0.141937	-0.33266
YLR213C	CRR1	D	-1.3874	0.430854	-0.241791	0.076771	0.159989	0.36383
YLR213C	CRR1	U	0.0522621	0.879188	-0.531642	-0.148504	-0.0341387	0.610619
YOR031W	CRS5	D	0.116208	-0.149578	0.0967013	1.50589	0.0513547	1.00201
YOR031W	CRS5	U	-2.07126	-1.04749	-1.56231	-2.18019	-1.37092	0.937756
YOL063C	CRT10	D	-0.146123	0.249688	-0.706177	0.0831891	0.5157	-0.330821
YOL063C	CRT10	U	-0.300188	0.733953	-0.267313	1.17356	-0.169411	-0.405719
YNL027W	CRZ1	D	-0.461661	-0.0567395	0.892499	-1.02676	-0.181595	-0.356478
YNL027W	CRZ1	U	0.428922	0.209907	0.0910724	-0.0979501	0.473519	-0.204917
YBR161W	CSH1	D	-0.382457	-0.191608	-0.480209	-0.426136	0.0122714	0.0468267
YBR161W	CSH1	U	0.252937	0.18857	-0.323478	0.364186	-0.741387	0.712267
YMR025W	CSI1	U	-0.172561	-0.152717	-0.291586	0.0753526	-0.0199816	0.490795
YIL132C	CSM2	D	-0.353663	-0.788615	-0.172732	-0.604332	-0.711958	0.0532494
YIL132C	CSM2	U	-0.2157	-0.772166	-0.0452476	0.759564	-0.0981087	0.143896
YMR048W	CSM3	D	-0.00996686	-2.53099	0.829491	-0.259979	0.0643211	-0.868555
YMR048W	CSM3	U	-0.257002	0.466338	1.1568	0.766197	-0.0991698	-1.00164
YPL200W	CSM4	D	-0.236929	-0.353085	-1.10654	-0.148797	-0.144183	0.767468
YPL200W	CSM4	U	0.311665	-0.260326	0.219756	0.166706	0.593055	-0.0230593
YJR084W	CSN12	U	-0.646097	-0.0232042	-0.242713	0.757536	0.430991
YJR084W	CSN12	D	-0.0854165	0.21704	0.281533	0.251943	-0.473331	-0.249076
YJR084W	CSN12	U	0.801314	0.711265	0.815602	0.614413	0.519283	1.72148
YDR179C	CSN9	U	-2.09973		-1.34243	-2.93083	-0.433683	0.952464
YDR179C	CSN9	D	-0.572975	0.703328	-0.927776	-0.634364	-0.0895824	-0.358694
YLR380W	CSR1	D	-0.777507	-0.0162855	-0.861551	-0.521174	0.042659	-0.598824
YLR380W	CSR1	U	-0.36455	0.415827	-0.786874	-0.0235538	0.213422	-0.359371
YPR030W	CSR2	D	1.79624	0.31359	0.050152	0.58062	0.221687	0.190723
YPR030W	CSR2	U	-0.477998	0.44137	-0.180305	0.110006	0.13594	-0.554411
YIL036W	CST6	D	1.11354		-1.18211			-0.126408
YLR394W	CST9	D	-0.0409238	-1.07815	0.165413	-0.216648	0.693072	-0.0223366
YLR394W	CST9	U	-0.0830657	0.133412	0.367169	-0.0925375	1.02645	-0.284435
YDR256C	CTA1	U	0.632126	0.901601	1.19352		0.552924	0.432684
YDR256C	CTA1	D	0.0617707	-0.707383	0.0271858	1.2213	-0.156129	1.71184
YLR381W	CTF3	D	-0.974263	0.593897	-0.39527	-0.26542	-1.81604	-0.59253
YLR381W	CTF3	U	-0.806219	0.822436	0.464042	-0.605576	-1.69686	-0.279495
YDR151C	CTH1	D	-0.753142	-0.00122048	-0.0419416	0.548496	0.162189	1.76799
YDR151C	CTH1	U	-0.289244	0.185928	-0.945487	-0.909441	-0.262651	-0.0581691
YPL181W	CTI6	D	0.756196	-1.41987	0.774102	-0.230238	-0.489211	-0.612945
YPL181W	CTI6	U	1.25214	0.0173161	0.511124	0.0858161	0.336792	-1.60395
YJL006C	CTK2	D	-0.62259	-0.297091	-0.123384		-0.53147
YJL006C	CTK2	U	2.26567	0.608956	1.92648		2.12072
YMR180C	CTL1	D	0.209604	0.40255	0.250926	0.177401	-0.0953842	-0.454892
YMR180C	CTL1	U	1.08626	0.742838	0.312935	-0.501698	0.0669071	0.481904
YHR109W	CTM1	D	-0.00494557	0.413644	0.356375	-0.45912	-0.782471	-0.828397
YHR109W	CTM1	U	0.485024	0.562544	0.951741	0.401771	-0.0367308	-0.298274
YBR291C	CTP1	D	-2.4126		4.22332		-1.27403
YLR286C	CTS1	D	-0.624452	-0.339995	-0.743491	-0.477574	-0.309445	-0.246884
YLR286C	CTS1	U	0.14559	-0.312111	0.779034	0.093255	0.374449	0.388554
YDR371W	CTS2	D	-0.262593	-0.50937	-0.407923	-0.169911	0.194251	0.857024
YDR371W	CTS2	U	-0.656028	-0.452159	-0.289722	-1.02989	-1.01595	-1.08861
YGR088W	CTT1	D	0.0964574	-0.38139	-0.342968	-0.215656	0.171465	-0.339169
YGR088W	CTT1	U	-0.553549	0.239775	0.694163	-0.261424	0.648452	0.359382
YMR264W	CUE1	D	1.54052	0.648308	-1.75424	-2.31184	-2.69951	-4.04822
YMR264W	CUE1	U	1.00867	0.655367	-0.973661	-1.67613	-2.13282	-3.55447
YKL090W	CUE2	D	-0.258626	1.54347	-0.533244	0.208073	-1.25273	0.279082
YKL090W	CUE2	U	-0.39447	-0.726358	0.0992137	1.26237	-0.0698998	1.2503
YGL110C	CUE3	D	-0.600285	-0.484391	0.703741	0.551852	0.151034	-0.518997
YML101C	CUE4	D	0.176568	-1.22308	0.148541	0.209177	-0.472935	0.160023
YML101C	CUE4	U	0.162782	0.254623	0.441511	0.425358	-0.28531	-0.21251
YOR042W	CUE5	D	-0.881426	-1.45445	-0.117079	-1.02233	0.0356872	0.164269
YOR042W	CUE5	U	-0.823446	-0.248744	-0.404808	-0.423891	-0.355658	-1.10257
YGR003W	CUL3	D	-0.11907	-0.0343834	0.139843	-0.239834	-0.118192	0.136363
YGR003W	CUL3	U	-0.137937	0.391791	0.300014	0.140751	0.689656	0.256145
YGL166W	CUP2	D	-0.348711	-0.820755	-0.489235	0.0911687	-0.255989	0.869164
YGL166W	CUP2	U	-1.28976	-0.0369753	-1.17188	-0.193165	-0.324395	1.02918
YPL177C	CUP9	D	1.66767	0.495126	0.516703	-0.11894	0.307626	-0.82907
YPL177C	CUP9	U	1.17604	-0.373815	0.731085	0.437839	0.350563	-0.407195
YNL286W	CUS2	D	0.193566	0.260352	1.09079	0.00354605	-0.494291	-1.2247
YNL286W	CUS2	U	0.287826	-0.365149	0.575769	0.199002	0.388058	-0.609132
YDR163W	CWC15	D	-0.264899	-0.406466	0.105814	-1.01504	-0.736014	-0.852849
YDR482C	CWC21	U	-0.0253573	0.604872	0.728443	0.2971	0.741685	0.0624999
YPL064C	CWC27	D	-0.180825	0.285841	0.0730619		0.264377	1.13367
YPL064C	CWC27	U	0.170001	0.679075	0.3041	1.37846	1.02215	1.11644
YGL027C	CWH41	U			0.508071	-0.831102	0.817948
YCR017C	CWH43	D	-0.268156	1.19793	-0.745981	-2.22797	1.50639	-1.66893
YKL096W	CWP1	U	-0.393747	0.707767	0.244295	0.249848	0.0682362	0.0985726
YKL096W-A	CWP2	D	0.569265	1.71637	-1.04419	1.08154	-2.68805	1.93716
YKL096W-A	CWP2	D	0.480676	1.54951	-0.716749	1.07749	-1.69004	1.87412
YKL096W-A	CWP2	U	-0.340448	-0.112508	0.0555287	0.131127	-0.795015	-0.49213
YML054C	CYB2	U	1.07925	2.10523	0.423107	0.05258	1.41352
YNL111C	CYB5	D	-0.126443	-2.20613	0.349612		0.603899	0.101181
YNL111C	CYB5	U	0.579258	2.15514	-0.843494	0.919435	0.406643
YJR048W	CYC1	D	0.233897	0.581532	-0.991879	1.7311	-1.30975	0.863913
YJR048W	CYC1	U	0.110218	-1.03216	-0.069992	0.934548	0.628398	0.38357
YOR037W	CYC2	D	-0.338018	0.542249	-0.410222		-1.07642	0.675945
YOR037W	CYC2	D	-0.635155	-0.010904	0.378594	-0.149382	-0.705804	0.511431
YOR037W	CYC2	U	-0.443686	-0.877051	-0.323729	0.334987	-1.01637	0.134746
YEL039C	CYC7	D	0.756763	-0.181669	0.471209	0.0122992	0.619874	-0.309046
YEL039C	CYC7	U	0.0185433	-0.364195	0.223315	-0.67954	0.279104	0.531374
YDR430C	CYM1	D	0.0816429	-1.01954	-0.296798	0.420006	0.108639	0.293428
YDR430C	CYM1	U	1.70881	0.613327	0.466059	2.31841	0.547546	0.860787
YML070W	DAK1	U	-0.815016	0.905016	-0.344475	0.1144	0.362687	0.210863
YFL053W	DAK2	D	0.259391	-0.178408	-0.418663	0.56546	0.121716	0.406219
YFL053W	DAK2	U	-0.0361131	-0.0728471	0.11255	-0.745057	1.01503	-0.634775
YIR027C	DAL1	D	-0.57772	-0.516073	-0.109957	-0.00856807	-0.0241518	0.342066
YIR027C	DAL1	U	-0.025699	-0.364344	0.0430116	-0.15952	0.231391	0.611263
YIR029W	DAL2	D	-0.427197	-0.626722	-0.534521	0.582701	0.161513	0.693937
YIR029W	DAL2	U	0.35587	-0.098815	0.180628	-0.141747	0.378556	0.374671
YIR032C	DAL3	D	0.371628	-0.925691	0.5778	-0.361454	1.21808	0.774935
YIR032C	DAL3	U	-0.284221	0.354174	0.374401	-0.0770753	0.862167	0.0854485
YIR028W	DAL4	U	0.105322	-0.378147	-0.223712	0.391032	-0.29946	0.0537523
YJR152W	DAL5	D	-0.0987563	0.178738	-0.255499	-0.497257	-0.294159	-0.211269
YJR152W	DAL5	U	1.04723	0.326723	0.998213	0.222267	0.141299	1.0171
YIR031C	DAL7	D	0.0758518	0.713435	0.537236	0.492398	0.124342	-0.524694
YIR031C	DAL7	U	0.231945	0.110983	-0.00951343	0.593455	0.379359	0.233993
YKR034W	DAL80	D	-1.09583	0.669253	0.169764	-0.110512	0.0613293	-0.259869
YKR034W	DAL80	U	-0.409217	-1.19456	-0.0614891	-0.593248	0.825948	0.5785
YIR023W	DAL81	U	2.06146	2.91215	1.58285		1.96201	1.9062
YIR023W	DAL81	D	4.9068	1.32771	4.25954	0.860165	2.87304	1.96134
YNL314W	DAL82	D	0.58001	-2.43916	-0.071454	0.415509	-0.276747	0.529615
YNL314W	DAL82	U	-1.45146	-1.01463	-2.74199	-0.267954	-2.28608	-0.278639
YJR150C	DAN1	D	0.049854	0.207927	0.688169	-0.00580681	-0.118024	-0.541245
YJR150C	DAN1	U	0.967246	0.348993	1.0444	0.305399	0.0970218	0.626122
YLR037C	DAN2	D	-0.0982678	-0.431055	0.105072	0.137105	-0.542915	0.095269
YLR037C	DAN2	U	0.793659	0.540595	0.966295	-0.074315	0.934143	-0.25307
YBR301W	DAN3	D	0.0901761	0.367076	-0.280625	-0.346006	0.406492	-0.376062
YBR301W	DAN3	U	0.589781	-0.234255	0.218302	-0.175179	0.379669	-0.0573979
YPL170W	DAP1	D	0.198507	-0.552272	-0.953315	-0.157957	-0.594604	0.221534
YPL170W	DAP1	U	-0.654112	-1.30782	-0.536562	-0.240909	-0.984039	-0.939322
YHR028C	DAP2	U		-0.467612	-0.538984	0.790098	0.249657
YHR028C	DAP2	D	0.0522796	0.0466335	-0.0326889	-0.253512	0.874181	0.026253
YHR028C	DAP2	U	0.782396	0.0825087	0.639265	0.0900233	1.33345	-0.207122
YML113W	DAT1	U	2.85378			3.95062		2.09637
YML113W	DAT1	D	1.51648	-0.697218	1.8859		1.38238	0.903872
YPR111W	DBF20	D	-0.150885	0.493804	0.0343162	0.449903	0.152047	0.232418
YPL119C	DBP1	D	-0.367972	-0.442721	-0.639646	-0.770044	-0.24534	0.0679586
YPL119C	DBP1	U	0.43703	0.0150148	-0.486372	-0.687333	0.139275	-0.737523
YKL149C	DBR1	D	-0.730389	-2.09997	-1.13451	-1.4292	-2.10018
YIR030C	DCG1	D	0.569872	-0.192847	0.343473	-0.0463397	0.692893	0.810897
YIR030C	DCG1	U	0.683916	0.0414221	1.05946	0.74206	1.02394	0.433209
YOR180C	DCI1	D	0.194004	-0.885931	-0.22917	-0.0831355	0.686809	-0.276695
YLR128W	DCN1	D	-0.783242	6.81772	-4.41607	8.33954	-0.343493	5.11601
YLR128W	DCN1	U	0.812327	1.3564	1.49797	11.998	1.45315	4.44486
YLR361C	DCR2	D	-0.279879	-0.391843	0.178954	0.580096	-0.229846	0.0258845
YLR361C	DCR2	U	0.646386	0.101675	0.309868	-0.120111	0.0843697	0.000395463
YOR173W	DCS2	D	2.26917	0.243344	1.11946	0.128462	-0.411945	0.513404
YOR173W	DCS2	U	1.1127	0.369837	1.28311	0.997962	-0.0112171	1.39699
YKL046C	DCW1	D	-1.07826	-0.0804321	0.429764	0.682798	0.547662	0.388392
YKL046C	DCW1	U	0.0942204	-0.376802	0.0825398	0.594791	-0.0449875	0.503639
YPL194W	DDC1	D	0.766279	-1.61711	0.10146	0.659449	0.816109	0.178168
YPL194W	DDC1	U	0.914928	1.01073	0.924734	0.755797	-0.106935	0.131547
YER143W	DDI1	D	-0.0431063	-0.275475	0.0768062	0.0455896	0.149531	0.199467
YER143W	DDI1	U	0.374668	0.522816	0.0971139	0.091461	-0.150439	-0.0618686
YNL335W	DDI3	D	-0.0561742	1.56101	0.170735	0.497102	0.660984	-0.0840896
YNL335W	DDI3	U	0.543192	0.764576	0.528138	2.01541	-0.0144701	0.259037
YOR163W	DDP1	D	-0.134059				0.0972381	1.7481
YOR163W	DDP1	U	-0.5842	-0.357264	-0.453026	0.0923602	-0.455122	0.308485
YMR173W	DDR48	D	0.0149844	-0.36001	0.242447	1.85392	0.664802	3.30706
YMR173W	DDR48	U	0.124716	0.55732	-0.104807	-0.208228	0.861516	0.758888
YBR201W	DER1	D	0.133407	0.188428	0.171328	-0.229311	0.0466616	0.726313
YOR030W	DFG16	D	0.739286	0.0904385	-0.396422	0.00696704	-0.215235	0.450313
YOR030W	DFG16	U	0.531616	0.148265	-0.201541	0.71179	0.0133695	-0.201355
YMR238W	DFG5	D	-1.11734	-0.976801	0.299761	0.214667	0.539746	0.0819275
YMR238W	DFG5	U	-1.21487	-2.07261	0.117263	-0.102679	-0.14188	-0.284081
YDR411C	DFM1	D	-0.0908682	-0.028807	0.367104	0.704101	0.324264	0.946834
YDR411C	DFM1	U	0.0672905	-0.273151	0.0371857	-0.308091	0.451701	0.305396
YOR245C	DGA1	D	0.447834	1.1765	-0.0659334	-1.02711	0.150284	-0.429282
YOR245C	DGA1	U	0.16019	-0.105705	-0.912653	1.42713	0.572598	1.1175
YMR316W	DIA1	D	0.99198	-0.0130179	0.0556478	0.237258	0.403868	-0.331674
YMR316W	DIA1	U	1.17014	-0.839034	0.262837	0.0124707	0.700611	-0.379683
YDL024C	DIA3	D	0.789701	0.278768	0.250369	0.0220022	-0.0205598	-0.359298
YDL024C	DIA3	U	-0.00847621	0.203968	-1.241	-0.000522138	-0.426863	-0.622219
YHR011W	DIA4	D	1.89576	1.93499	2.80003			0.497586
YLR348C	DIC1	D	0.517533	0.779134	0.187105	0.0405268	-0.221887	-0.240142
YLR348C	DIC1	U	0.114232	-1.14932	0.0706075	-0.59704	-0.149287	-0.278189
YKR035W-A	DID2	D	-0.732197	-1.18236	-1.00991	-0.493949	-2.10323	-2.34082
YKR035W-A	DID2	U	0.483747	-0.747975	-0.171307	-0.968138	-1.92419	-2.50619
YGR227W	DIE2	D	0.237371	0.212903	-2.45107	-1.06949	-0.951295	-1.15609
YPL049C	DIG1	U	1.48523	0.47362	1.56671	-0.25222	0.434179	-0.27306
YDR480W	DIG2	D	-0.557831	-0.572216	0.44754	-0.296427	0.0971088	0.579518
YDR480W	DIG2	U	0.882693	0.946333	0.648474	-0.759206	0.569355	0.590296
YDR263C	DIN7	D	1.18418	0.79253	0.0767058	-0.105999	0.511488	-0.240238
YDR263C	DIN7	U	-0.453281	0.806209	0.526717	0.582958	-0.466029	-0.0551305
YPL265W	DIP5	D	2.03707	2.38482	0.831185		-0.929115	1.74258
YDR403W	DIT1	D	0.19568		0.0946505	-0.413516	0.978143	0.612213
YDR403W	DIT1	U	-0.630763	0.066784	-0.933553	-0.796961	-0.816181	-0.829331
YDR402C	DIT2	D	-0.914009	-0.851968	-0.763226	0.441808	0.0186023	0.277739
YDR402C	DIT2	U	-0.920769	0.620384	-1.8854	0.0215696	0.235202	0.110751
YIR004W	DJP1	D	-0.280356	-0.43249	-0.387428	0.0377777	1.07521	0.300192
YIR004W	DJP1	U	-1.10966	-0.173775	-1.03258	0.0776952	-0.602291	0.130397
YDL174C	DLD1	D	0.0831355	-0.463617	-0.0961253	-0.517335	0.0798528	0.541073
YDL174C	DLD1	U	0.483229	0.16067	0.479293	-0.012208	0.587933	-0.153381
YDL178W	DLD2	D	-0.459149	0.105793	0.262654	-0.665931	-0.022217	0.625146
YDL178W	DLD2	U	-0.0997714	0.0666316	-0.0724075	-0.402964	-0.0173707	-0.553605
YEL071W	DLD3	D	0.217547	0.011757	-0.837755	-0.36363	0.993684	0.594977
YEL071W	DLD3	U	0.341778	0.156215	0.61277	-0.0862347	0.685162	0.143398
YJL065C	DLS1	D	0.30168	0.373969	-0.314982	-0.231785	0.200571	-0.646633
YJL065C	DLS1	U	0.252039	0.0407777	0.273223	-0.715622	0.152132	-0.703163
YHR115C	DMA1	D	0.341275	0.0518364	-0.328507	0.184451	0.530184	0.626157
YHR115C	DMA1	U	0.382497	-0.113639	0.808092	0.338582	-0.00515373	0.0154489
YNL116W	DMA2	D	-0.67242	-0.951014	-0.141837	-0.115832	-0.420372	-0.407089
YNL116W	DMA2	U	0.373162	-0.185059	0.734081	0.270554	0.387922	-0.527443
YER179W	DMC1	D	0.0697833	0.701902	0.167808	0.721745	-0.324279	-0.104456
YER179W	DMC1	U	0.0948873	0.403363	-0.217663	0.0549886	-0.795332	0.160346
YER166W	DNF1	D	-0.115218	-0.581572	1.04664	-0.0567483	-0.52976	-0.588554
YER166W	DNF1	U	-0.554438	-0.619838	0.018248	0.008119	-0.355567	-0.124789
YDR093W	DNF2	D	-0.310357	0.8105	0.276827	0.809578	0.254014	1.13444
YDR093W	DNF2	U	0.123215	-0.460237	0.454151	0.685301	-0.531481	0.254384
YMR162C	DNF3	D	0.210111	-0.259134	-0.908146		-0.989923	3.48473
YMR162C	DNF3	U	-0.736806	0.731333	0.47116	0.394123	-0.414791	0.0724962
YOR005C	DNL4	D	0.32491	0.0291789	0.760717	-0.592984	0.666598	-0.45903
YOR005C	DNL4	U	0.295895	0.30023	0.603017	-1.28057	1.07355	-0.196958
YLL001W	DNM1	U	0.33739		0.421132	0.371187	0.514969	0.0668834
YLL001W	DNM1	D	0.295339	-1.17961	-0.128609	0.328274	-0.227779	0.243568
YKL213C	DOA1	D	-0.813706	-3.21386	-4.99383	-7.28146	-4.08005
YHR044C	DOG1	D	-0.672525	-0.842434	-0.624814	-0.175984	-0.282933	0.471597
YHR044C	DOG1	U	0.259585	-0.00114334	0.335937	1.01138	0.234758	-0.214093
YHR043C	DOG2	D	0.424423	0.0180663	0.518198	0.262519	0.759934	0.65071
YHR043C	DOG2	U	0.262631	0.92683	0.426343	0.0784791	0.375744	-0.387788
YDR273W	DON1	D	-0.345337	-0.281587	-0.193626	-0.295835	-0.116664	-0.281542
YDR273W	DON1	U	-0.990906	-0.608091	-0.541978	0.21249	0.110375	-0.442014
YDR273W	DON1	U	-2.49121	-0.216425	-2.89627	-1.07316	-1.3172	-2.46409
YDR068W	DOS2	D	-0.464016	-1.20743	0.80049	-0.300397	-0.0487883	-0.701674
YDR068W	DOS2	U	0.501289	0.226188	-0.312938	0.76607	0.293294	0.557334
YDR440W	DOT1	D	0.104067	-0.223194	-0.285748	-0.582794	0.57265	-0.438246
YDR440W	DOT1	U	0.391756	0.13012	0.482983	0.0790781	0.166009	-0.258944
YIL010W	DOT5	D	-0.00193459	-0.295017	-0.00637821	-0.569676	0.0344828	-0.187846
YIL010W	DOT5	U	0.407098	0.22636	0.0182383	-0.151721	0.26345	-0.410348
YER088C	DOT6	D	0.761913	0.72092	0.950661	0.688346	0.28764	1.35228
YER088C	DOT6	U	0.259445	0.894926	-0.292605	0.330067	0.481176	1.29575
YBR278W	DPB3	D	0.792595	-0.202465	0.498272		1.44933	0.0485172
YBR278W	DPB3	U	0.636811	1.7453	1.08455	6.08606	-0.219511	-0.789876
YDR121W	DPB4	D	0.570401	-2.36051	-0.40669	-1.24877	0.193212	-1.37261
YDR121W	DPB4	U	0.447668	-1.46653	-1.54822	-0.398165	-1.64443	-0.815425
YKL191W	DPH2	U	0.898919	1.73124	1.51873	-1.53638	-1.06964	0.0273795
YLR172C	DPH5	U	-3.87462	2.531	-2.73014		0.534648	0.0627187
YLR172C	DPH5	D	-1.25287	-0.472659	-0.585308	-1.20777	-1.36363	-0.383847
YDR294C	DPL1	D	-0.663083	-0.893771	0.0978079	0.04905	-1.29715	0.834402
YDR294C	DPL1	U	-0.620438	-1.36116	-0.359235	-0.903725	-0.332011	0.256153
YDR284C	DPP1	D	-0.251704	-0.507278	-0.0741701	0.0943687	0.059427	-0.0724929
YDR284C	DPP1	U	-2.18114	0.163765	-0.170442	0.516404	0.581167	0.780583
YER124C	DSE1	U	-0.914722		-0.170227	0.890156	-1.40536
YER124C	DSE1	D	0.747454	0.71587	-0.623092	0.420346	1.0073	-0.533727
YHR143W	DSE2	D	-1.6101	-0.409702	-0.0536343		0.506058	2.18569
YHR143W	DSE2	D	-0.311898	0.332382	-0.103828	2.09583	0.899017	3.58171
YHR143W	DSE2	U	-0.0114464	-0.45964	0.642529	0.289682	-0.583681	-0.206475
YOR264W	DSE3	U	-0.552937	0.389399	-0.201938	0.10282	0.607868	-0.0452149
YNR067C	DSE4	D	-0.48448	-0.405077	-0.501177	0.0781683	-0.238897	-0.0209822
YNR067C	DSE4	U	0.395696	-0.0600722	0.264789	0.107167	0.248621	-0.0605769
YBR007C	DSF2	D	0.146071	-0.817487	-0.532396	-0.0955208	-0.248147	-0.181462
YBR007C	DSF2	U	-0.150465	0.567917	0.148014	-0.746068	0.233684	-0.28151
YMR276W	DSK2	D	0.109686	0.130528	-0.25953	0.535647	0.233048	-0.0362505
YMR276W	DSK2	U	0.655049	0.490171	-0.0322786	0.0496622	0.557008	-1.35989
YPR017C	DSS4	D	-0.471137	0.313313	0.267863	0.062248	0.597496	0.470167
YPR017C	DSS4	U	0.131435	0.489312	-0.150408	0.444638	0.271835	0.360727
YDL219W	DTD1	D	0.405375	0.18262	-0.0635003	-0.372278	-0.183556	-0.60522
YDL219W	DTD1	U	0.398942	0.330508	0.809187	-0.421917	0.389782	0.138842
YBR180W	DTR1	D	0.67348	1.09263	0.679122	-0.0916893	0.439003	0.259511
YBR180W	DTR1	U	-0.133288	-0.056237	-0.104241	-0.0389639	-0.472418	-0.344374
YBR208C	DUR1,2	D	1.63441	-0.273173	-0.413983	-0.478484	0.72265	-0.15594
YBR208C	DUR1,2	U	0.198206	0.893592	0.534883	0.367718	-0.373369	-0.70216
YHL016C	DUR3	U	-0.729678	-0.211738	-0.418902		-0.895625	0.381508
YHL016C	DUR3	D	-0.502504	-0.343257	-0.769854	0.0366378	0.274933	-0.0273233
YML080W	DUS1	U	0.127586	0.39234	0.634995	0.100245	0.0321245	0.315144
YLR401C	DUS3	U	0.241228	0.403491	-1.1678	0.85184	-1.8798	0.744652
YLR405W	DUS4	D	-0.712271		0.144416		1.99473
YLR405W	DUS4	U	-0.354539	-1.64734	-0.530526	0.750768	-0.752851	1.07632
YKR054C	DYN1	U	-0.768018	-1.81997	-0.778292	0.46039	-1.54706	-0.533819
YDR424C	DYN2	D	0.118303	0.40685	0.55766	-0.0662301	-0.112611	0.669334
YDR424C	DYN2	U	0.0288956	-0.0352573	-0.029313	0.371981	-0.21076	0.231142
YMR299C	DYN3	D	-1.2179			0.968993	-1.61963
YMR299C	DYN3	U	-1.23425	-2.43284	-2.22162	1.97934	-0.63623
YPR023C	EAF3	D		-0.511927	0.24157	-0.54977	-0.477986	-0.742138
YPR023C	EAF3	U	-0.805387	1.51178	-0.9078	-0.578985	0.0474371	-0.839662
YEL018W	EAF5	D	-0.245162	0.463713	1.38745		0.905431	0.829092
YEL018W	EAF5	U	-0.247807	0.270002	0.328385	-0.227858	-0.00460933	1.06713
YJR082C	EAF6	D	-0.459183	-1.35383	-1.33734	0.197816	-0.604305	-1.489
YJR082C	EAF6	U	-0.509491	-0.501519	-0.757667	-0.969161	-0.726512	-1.18889
YNL136W	EAF7	U	0.32739		1.07087		-0.707247
YDR206W	EBS1	D	0.461986	0.691665	0.32032	-0.397413	0.000515765	-0.209382
YDR206W	EBS1	U	-0.258351	-0.0458593	0.964692	0.794629	0.449139	-0.0695024
YLR284C	ECI1	U	-0.23343		-0.378899	1.0031	-0.476271	-0.172869
YLR284C	ECI1	D	0.436537	1.16567	0.50576	0.256249	0.606167	-0.0631563
YAL059W	ECM1	U	-1.11445	0.172288	-0.689395	0.61816	-0.742999	-0.803808
YEL030W	ECM10	U	0.418176	0.318763	0.354335	0.182993	0.698117	0.79694
YEL030W	ECM10	U	-0.0710228	0.198416	0.546537	-0.172553	0.220857	0.566743
YDR446W	ECM11	D	0.209091	-1.30816	-0.324549	0.080205	-0.235216
YHR021W-A	ECM12	D	0.15932	0.357387	-0.531199		-0.111628	0.338557
YHR021W-A	ECM12	U	0.494451	0.756216	0.177709	-0.783936	0.128327	-0.0416369
YBL043W	ECM13	U	-0.882936	0.491298	0.470665		-0.549846	0.351567
YBL043W	ECM13	D	0.699868	0.295004	0.140692	-0.135579	0.109831	-1.04711
YHR132C	ECM14	D	0.673084	1.56554	1.68935	-1.23318	0.51403	-0.797372
YHR132C	ECM14	U	-1.27486	1.86868	-0.63847	-0.575958	0.0112224	0.217776
YBL001C	ECM15	D	0.216862	0.324647	0.423657	-0.231767	-0.930609	0.427243
YBL001C	ECM15	U	-1.04583	-0.9735	-0.291755	-0.499696	-0.113542	-0.107906
YJR137C	ECM17	D	1.49139	1.49143	0.813978	-1.28952	0.631618	-1.7904
YJR137C	ECM17	U	-0.766606	-2.14647	-2.06186	-2.49948	-1.54922	-1.46338
YDR125C	ECM18	D				-2.08923	0.710227	0.0829655
YDR125C	ECM18	U	0.98154		1.87941	0.728738	1.09348
YLR390W	ECM19	D	1.06705	-0.869539	-0.320095	0.0607085	0.516973	-1.57882
YLR390W	ECM19	U	-0.0317128	0.409705	0.524005	-0.0339513	0.692683	0.171685
YLR390W	ECM19	U	0.0136696	0.632417	0.549303	-0.422539	0.685021	0.490296
YBR065C	ECM2	D	-0.392857	-0.0694349	-0.116154	-0.277104	0.604531	1.10554
YBR065C	ECM2	U	-0.316203	-1.37087	-0.416111	-0.738526	-0.530316	-0.167842
YBL101C	ECM21	D	-0.432312	-0.531597	1.37616	-1.19773	0.316864	-0.0514771
YLR228C	ECM22	U	0.233893	-0.248492	-0.345098	-0.764369	-0.0725367	1.54171
YPL021W	ECM23	D	0.135212	-0.0588287	-0.156377	-0.200274	-0.446092	-0.143088
YPL021W	ECM23	U	0.592115	1.0956	1.04823	-0.201101	0.856985	-1.50532
YJR106W	ECM27	D	-0.445311	-0.853313	-0.404015	1.27145	-0.00618485
YJR106W	ECM27	D	0.15967	0.2044	0.132133	0.122331	0.710669	0.151855
YJR106W	ECM27	U	0.163546	-0.0341601	-0.193335	4.80622e-05	0.375795	-0.382471
YHL030W	ECM29	D	-0.20569	-0.419438	-0.190926	0.169569	-0.0933041	0.677582
YHL030W	ECM29	U	-0.161377	0.166911	0.382228	-0.494077	0.934213	0.237764
YOR092W	ECM3	D	-1.61059	-1.30758	-0.70892	0.994647	-1.16642	1.50144
YOR092W	ECM3	U	-0.276575	-0.707004	0.37253	-0.448397	-0.823082	-0.120966
YLR436C	ECM30	U	0.618943	0.667827	0.475499	0.110644	0.681956	0.00578435
YBR176W	ECM31	D	1.10949	0.205154	0.511678	0.51285	-0.37627	-0.174009
YBR176W	ECM31	U	-0.50979	-0.933343	-0.27309	-0.48482	-0.490483	-0.277399
YER176W	ECM32	D	-0.705952	-1.30419	-0.00361628	0.451318	0.137994	0.346393
YER176W	ECM32	U	-0.802368	0.154963	-1.25516	-0.160891	0.266745	1.13571
YHL043W	ECM34	D	-0.537478	-0.0860426	0.10124	0.13377	0.135609	-0.113969
YHL043W	ECM34	U	-0.625506	-0.478419	-0.306061	0.152887	-0.376079	0.403842
YIL146C	ECM37	D	0.905074	-0.322995	1.22845	0.414825	0.0725136	-0.0930505
YIL146C	ECM37	U	1.03984	0.154326	1.32163	-0.271725	0.487529	-0.20901
YLR299W	ECM38	D	0.274957	0.871381	0.257522	-0.220883	-0.0436667	0.0784043
YLR299W	ECM38	U	0.640501	0.466822	-0.230738	-0.375879	0.993142	-0.119786
YKR076W	ECM4	D	-0.162933	0.235377	-0.122741		-0.278213	1.44149
YKR076W	ECM4	D	0.0903551	-0.518856	0.647607	-0.495406	0.227223	0.588674
YKR076W	ECM4	U	-0.0726273	0.0723933	-0.369397	0.789175	-0.162988	0.229651
YMR062C	ECM40	D	0.481125	-2.50497	-0.741672	-1.14678	1.62569
YMR062C	ECM40	U	1.85771	0.754414	0.805772	-0.120541	-0.0311031
YMR176W	ECM5	D	-0.271924	-0.739513	-0.213846	-0.243358	-0.495102	-0.181152
YMR176W	ECM5	U	0.187155	-0.534446	-0.292701	0.611372	-0.105136	-0.088755
YLR443W	ECM7	D	0.215822	-0.0186634	0.138943	-0.967839	0.200469	-0.638717
YLR443W	ECM7	U	0.422566	-0.393082	-0.35298	0.689655	0.407719	-0.956268
YBR076W	ECM8	D	0.0871813	0.0199925	-0.0983895	-0.590289	0.449622	0.822368
YGL222C	EDC1	D	-0.948787	0.754781	-0.00940995	0.12115	1.69547	0.92789
YGL222C	EDC1	U	0.510774	-0.199981	1.06418	-0.44935	1.19809	-0.622372
YEL015W	EDC3	U	-1.68766		1.1172		-0.709802
YEL015W	EDC3	D	0.0736558	0.267097	-0.0308058	-0.0236354	0.655328	-0.6369
YBL047C	EDE1	D	-0.517916			-4.36256		-1.17785
YBL047C	EDE1	U	-0.767074	0.486881	-1.3504	-1.56979	-0.316419	-2.8729
YBR033W	EDS1	D	-0.290886	-1.36051	0.467301		-0.49197	0.0771726
YBR033W	EDS1	U	0.081349	0.382607	-0.160878	-0.667121	-0.327083	-0.641838
YPL095C	EEB1	D	-1.53089	-0.285015	-0.918174	1.12705	-0.82329	0.269751
YPL095C	EEB1	U	-0.41458	0.540904	0.132189	-0.654146	0.392953	-0.242554
YOR133W	EFT1	D	-0.312962	0.486426	-1.25223		1.22643
YOR133W	EFT1	U	0.158921	0.164173	-0.353443	-0.379049	-1.69501
YPL037C	EGD1	D	-0.614823			1.12131	0.359773
YHR193C	EGD2	D	-1.06824	-0.850246	-0.361846	-0.927741	-0.919414	-0.0155284
YHR193C	EGD2	U	-1.33581	0.447263	-0.114097	-1.25611	-2.09477	-1.39883
YNL327W	EGT2	D	0.378693	0.51171	-0.304037	0.162521	0.432725	-0.373331
YNL327W	EGT2	U	-0.0783058	-0.671826	-0.0940293	0.500106	0.219843	0.0810691
YDR036C	EHD3	D	-0.175141	0.00151099	0.227729	0.232321	0.828366	-1.03169
YDR036C	EHD3	U	0.02012	-0.140547	-0.193087	-0.340586	0.238016	-1.28824
YBR177C	EHT1	D	0.13194	-0.520875	-0.103995	-0.385949	0.000483143	0.49226
YBR177C	EHT1	U	-0.829464	-1.1293	-0.49157	-0.905114	-1.20599	0.477109
YDR147W	EKI1	D	0.337485	1.06072	0.544804	0.633652	0.287818	-0.475615
YNL230C	ELA1	D	1.18365	0.0377525	0.267215	0.200115	0.329881	0.0360768
YNL230C	ELA1	U	0.44626	0.898643	0.586377	1.02712	0.549999	-0.113254
YPL046C	ELC1	D	0.488067	-0.110351	0.722655	-0.349497	-0.0511507	-0.280601
YPL046C	ELC1	U	-0.0219836	0.540456	0.787316	-0.461356	-0.129998	0.0860232
YKL160W	ELF1	D	-0.811979			2.04618	1.81048	1.51319
YOR144C	ELG1	U	0.320299	0.842374	1.3627		1.35226	0.355549
YOR144C	ELG1	D	-0.106712	-0.028987	-0.403951	-1.08562	0.15116	-0.648906
YJL196C	ELO1	D	0.0690557	-0.38844	-0.554138	-0.468157	-0.376752	-0.0396702
YJL196C	ELO1	U	-1.95094	-1.68046	-2.61572	-0.206781	-1.63505	0.333186
YOL071W	EMI5	D	0.340652	-0.928209	-2.46348
YOL071W	EMI5	U	-0.277248	-1.34607	-0.764957	-1.02603	-1.3648	-1.66352
YLR080W	EMP46	D	-0.0769706	-0.474544	0.872397	1.00642	0.145153	0.851528
YLR080W	EMP46	U	0.211432	-0.872546	0.173084	0.591259	1.08547	0.349605
YFL048C	EMP47	D	-0.0830133	-0.650797	0.355843	0.972037	-0.34539	0.256074
YFL048C	EMP47	U	0.625517	0.208714	0.40013	-0.517497	0.191015	0.0670807
YLR083C	EMP70	U	0.221759		-0.222262		-0.901727
YLR083C	EMP70	D	1.49149		-0.196361	1.41963	0.121269
YOL158C	ENB1	D	-0.109757	0.596452	-0.177735	-0.29897		0.372231
YOL158C	ENB1	U	-0.186085	0.170976	0.334363	-0.350422	0.397467	-0.113198
YGR254W	ENO1	D	0.456513	-0.725651	-0.253368	-0.386001	0.790791	-0.769907
YGR254W	ENO1	U	0.190154	-0.170859	0.359196	1.62748	-0.129793	0.531207
YDL161W	ENT1	D	-0.309799	-0.602556	-0.236364	0.316435	0.34104	-0.0731874
YDL161W	ENT1	U	0.812657	0.865379	0.934683	0.723412	0.680518	0.419871
YLR206W	ENT2	U			1.15202	1.52514	0.502986
YLR206W	ENT2	U	0.46156	0.683784	-0.449769		-0.79965	0.937814
YLR206W	ENT2	D	0.852577	0.813585	0.294408	-0.239069	-0.286227	-0.277402
YJR125C	ENT3	D	0.32967	-0.592844	0.388809	0.0431742	-0.185591	-1.71282
YLL038C	ENT4	U	-0.100117	0.320831	-1.1709	0.0894088	-0.266085
YLL038C	ENT4	D	0.0675273	-0.342634	-0.666013	0.221914	-0.386988	0.397103
YDR153C	ENT5	U	-0.10623	-0.0351364	-0.0754845	0.733625	-0.261401	0.138993
YIL005W	EPS1	D	1.21877	1.01401	0.926052	1.40563	0.359938	0.453868
YHR123W	EPT1	D	0.376164	0.662126	0.341679	-0.232382	0.768753	-0.731753
YHR123W	EPT1	U	-0.606498	-1.67816	-0.144793	-0.175115	-1.21165	0.141047
YDR414C	ERD1	D	-1.32907	1.68642	-1.09185	-1.27673	0.191183	-3.63054
YDR414C	ERD1	U	-1.87925	0.450743	-1.5296	-0.396239	0.263123	-1.24842
YLR246W	ERF2	D	-0.458958	-1.97303	-0.109009	0.017083	0.050985	0.0118538
YLR246W	ERF2	U	1.09276	-2.29008	1.41752	1.60127	1.16225	1.24872
YMR015C	ERG5	U	-0.656388	-2.58873	-0.869609	0.315732	0.516898	0.142714
YFR041C	ERJ5	D	-0.916404	-0.762272	-0.481021	0.678565	0.304671	0.37007
YFR041C	ERJ5	U	0.448564	0.903211	0.953301	0.715995	0.891652	1.34029
YFR041C	ERJ5	U	0.417813	1.20942	1.33387	1.19082	1.35461	0.472512
YAR002C-A	ERP1	D	0.642774	0.157297	-0.457375	-0.507833	0.480441	-0.0715038
YAR002C-A	ERP1	U	-0.450104	0.851557	1.19087	-0.521019	0.228727	-0.197042
YAL007C	ERP2	U	-0.461506	0.450762	-0.414188	-0.0362437	0.228332	0.136455
YDL018C	ERP3	U	-0.783106		0.565903	-1.21673	0.0514762	0.0469871
YDL018C	ERP3	D	-0.215975	0.490224	0.76902	-0.937475	1.2228	0.0436893
YOR016C	ERP4	D	-0.783644	-0.123629	-0.612994	0.501064	-0.12786	1.04792
YOR016C	ERP4	U	-0.0304647	-0.165671	0.0219275	0.78916	0.720464	0.273697
YHR110W	ERP5	D	0.59388	0.330879	0.504693	0.194349	-0.858122	0.878076
YHR110W	ERP5	D	0.948041	-0.327157	0.93418	1.39926	-0.195494	3.55394
YHR110W	ERP5	U	0.136814	0.632841	-0.156901	0.985563	0.65732	1.14882
YGL002W	ERP6	U				-1.63553	-0.430207	-0.0455318
YGL002W	ERP6	D	-0.684268	0.257807	-0.471457	-0.746402	0.820539	-0.323603
YGL002W	ERP6	D	-0.361878	-0.901793	-0.746199	0.297301	0.630168	-0.201226
YCR075C	ERS1	D	0.319184	0.544624	0.758195	0.83577	0.313117	-0.650961
YCR075C	ERS1	U	0.393711	1.21299	-0.0914358	-0.403381	0.765993	-0.424526
YBR210W	ERV15	D	-0.295798	1.27289	-0.185457	-0.691783	0.507406	-0.185164
YBR210W	ERV15	U	-0.619065	-0.392408	0.597461	0.198041	-1.60997	-1.05033
YPR037C	ERV2	D	-0.462729	-0.0743484	-0.105347	-0.938835	0.793781	0.0307338
YPR037C	ERV2	U	-0.578817	-2.14772	-0.0557815	0.658367	-0.602366	0.832926
YML012W	ERV25	U	0.644436	0.609527	0.675286	0.0178388	-0.918408	-0.556655
YGR284C	ERV29	D	-0.400657	-0.157437	1.15063	-0.249891	-0.0613615	0.463043
YGR284C	ERV29	U	-0.600604	-1.53391	0.168431	-0.307344	-0.720621	-0.328427
YML067C	ERV41	D	-0.561243	-0.0890052	0.127997	-0.437107	-0.387871	-0.110525
YML067C	ERV41	U	-0.647767	0.23937	0.423282	-0.668481	0.367454	-0.460453
YAL042W	ERV46	U	-0.557489	-3.02532	-0.183355	-2.02498	-0.747477
YNL125C	ESBP6	D	-0.386482	-0.0230943	-0.151266	-0.236928	-0.135801	-0.315255
YNL125C	ESBP6	U	0.44981	0.26938	0.7224	0.173872	0.0414482	-0.657646
YOL017W	ESC8	D	0.0920833	0.481024	0.274928	0.568946	0.175907	-0.702984
YLR318W	EST2	U	-1.03225	1.19658	0.76364	0.598184	-0.566323	1.1671
YIL009C-A	EST3	D	0.38634		0.0381703		0.649618
YIL009C-A	EST3	U	0.067744	0.317744	1.63427	-0.205154	0.998173
YLR300W	EXG1	D	0.275062	0.246189	0.506434	0.301027	0.78099	-0.159541
YLR300W	EXG1	U	-0.617981	-1.98723	-0.61702	0.458759	-0.186504	1.26338
YDR261C	EXG2	D	-0.439306	-0.522342	0.0693988	0.143564	0.459822	-0.433553
YDR261C	EXG2	U	0.413675	1.00069	-0.163145	0.597919	0.182074	-0.219881
YOR033C	EXO1	D	-0.37835	0.504172	-1.2535	1.34087	-0.382685	1.13118
YOR033C	EXO1	U	-0.0246089	-0.0637162	-0.41188	-0.0466402	0.200433	0.167794
YOR317W	FAA1	D	0.156024	-0.16972	-0.932783	0.079624	-0.0720811	0.488313
YOR317W	FAA1	U	0.291458	0.994921	0.556573	0.11641	0.876052	0.770622
YIL009W	FAA3	D	0.210617	-0.782381	0.396377	0.162568	-0.183486	-0.130776
YIL009W	FAA3	U	-0.191635	-0.0738651	0.160702	0.0734953	-0.204693	-0.422604
YMR246W	FAA4	D	0.450551	-0.769992	-0.6344	-0.489489	-0.0494041	0.353842
YMR246W	FAA4	U	-0.588561	-0.325825	-0.405421	0.0463241	-0.449019	0.426408
YNL023C	FAP1	U			-0.0610686	1.63351	-1.13133
YNL023C	FAP1	D	-0.00896824	-0.362943	0.413969	-0.296894	-0.111438	0.106065
YJL157C	FAR1	D	1.01242	1.16451	0.549575	0.656056	0.765773	0.0137623
YJL157C	FAR1	U	-0.152847	-0.104368	-0.451538	0.832414	0.227021	0.795195
YLR238W	FAR10	D	-0.438722	0.926042	-1.63132	-0.532481	-0.714241	-1.52744
YNL127W	FAR11	D	-1.6259	-0.443043	-1.02811	-0.954107	-2.61225	-2.30984
YNL127W	FAR11	U	0.546731	-1.44226	-0.323088	-0.172202	-2.99689	-2.96264
YMR052W	FAR3	U	-0.30022	-0.881855	0.135763		-4.0601	-1.95755
YMR052W	FAR3	D	0.708609	0.0206287	0.192577	-0.873266	-3.38685	-4.22394
YFR008W	FAR7	D	0.252375	0.123343	-0.0927171	0.181479	-1.8185	-1.67347
YMR029C	FAR8	U	-0.716265	-0.244129	-0.144533	-0.550101	-0.898797	-1.85751
YER183C	FAU1	D	0.396395	-0.414267	-0.118296	0.777492	0.869226	0.345045
YER183C	FAU1	U	-0.083681	-0.419046	-0.507438	-0.470723	-0.114679	-0.11188
YLR377C	FBP1	D	-0.142418	0.665755	-1.56084	-0.923161	-2.24676	-0.874271
YLR377C	FBP1	U	-0.364481	0.771891	-0.179645	-0.350477	-1.60197	-1.62384
YJL155C	FBP26	D	1.25622	0.220213	1.33062	1.03782	-0.0743763	0.882274
YJL155C	FBP26	U	0.688255	0.123366	1.13098	1.06398	-0.625753	0.4752
YPR062W	FCY1	D	1.01184	0.654686	0.2814	0.0688853	0.189818	-0.324051
YPR062W	FCY1	U	0.654006	0.980935	0.462739	-0.044077	1.39092	0.354382
YER056C	FCY2	D	0.0370075	0.747834	0.915901	-0.651269	1.33744	-0.822014
YER056C	FCY2	U	0.163042	0.985724	0.0148869	-0.585525	1.56701	0.858281
YER060W	FCY21	D	0.28631	-1.69737	-0.420041	-0.0784237	0.200273	1.01005
YER060W	FCY21	U	0.556845	0.0667523	-0.288349	0.714895	0.228907	-0.115428
YER060W-A	FCY22	D	0.222469	-0.572965	-0.636641	-0.476102	0.325317	-0.144877
YER060W-A	FCY22	U	-0.529032	-0.166387	-0.185924	-0.174637	-0.382621	-0.0402377
YCR034W	FEN1	D	2.87318	0.18519	2.54586	2.77398	0.121203	1.4942
YCR034W	FEN1	U	1.2405	1.04141	2.10666	2.24476	0.294648	2.29264
YBR101C	FES1	D	1.37363	0.803003	0.496028	-0.297039	0.267863	-0.374903
YBR101C	FES1	U	-0.0723831	-0.0434647	-0.613134	-1.03767	-0.588655	0.237942
YMR058W	FET3	D	-0.399614	0.222502	0.438592	1.18242	0.12466	0.903309
YMR058W	FET3	U	-0.131028	1.33074	1.28113	0.0773469	-0.733931	0.861242
YMR319C	FET4	D	0.518718	0.579042	-0.40081	-0.117406	-1.0739	-0.877439
YMR319C	FET4	U	0.690171	0.373989	-1.05415	-0.795139	0.236609	0.454906
YFL041W	FET5	D	-0.271246	-0.230123	0.0167007	0.973428	-0.505975	0.904705
YFL041W	FET5	U	0.693446	-0.811551	-0.183697	0.44315	-0.0884045	-0.436539
YBR040W	FIG1	D	-0.190218	-0.763522	-0.916659	-0.229878	0.183376	0.260198
YBR040W	FIG1	U	-0.611202	-0.143988	-0.264671	-0.124535	-0.661131	-0.770265
YCR089W	FIG2	U	-0.0970455	-0.507379	0.367395	0.0299693	0.207359
YCR089W	FIG2	D	-0.327619	0.310873	0.270587	0.195469	-0.3768	-0.490049
YNL325C	FIG4	U	-0.40161	0.0995626	-0.124585		-1.4664	0.835453
YNL325C	FIG4	D	0.560981	-0.074205	1.04459	-0.094543	-0.102849	-0.150239
YDR130C	FIN1	D	0.00306316	-1.24462	-0.50097	-0.586533	-0.213206	0.447439
YDR130C	FIN1	U	-0.473911	0.491526	-0.26478	-0.238686	0.258547	0.401948
YER032W	FIR1	D	-0.0207479	-1.11089	0.729007	0.274635	0.0104271	-0.219237
YER032W	FIR1	U	0.880648	-0.817378	-0.0916974	-0.160402	-0.630552	0.0606848
YIL065C	FIS1	D	0.585814	-0.806548	0.301325	-0.489008	-2.10569	-2.5707
YIL065C	FIS1	U	0.608889	-0.504472	0.931181	-0.72956	-1.43246	-3.87714
YDR534C	FIT1	U	0.157736	0.378583		-0.748113	0.25883	0.360218
YDR534C	FIT1	D	-0.494726	-1.36074	-0.422794	0.37758	0.588819	0.370783
YOR382W	FIT2	D	-1.18533	0.467993	-0.793065	0.00734212	0.195346	0.477016
YOR382W	FIT2	U	-0.176714	-0.311761	0.426771	0.193372	0.0975357	0.0480847
YIL131C	FKH1	D	-0.168969	0.436672	0.329252	-0.166192	-0.247467	0.226845
YIL131C	FKH1	U	-0.709354	0.124328	-0.251866	0.343049	-0.187883	-0.203766
YNL068C	FKH2	U	1.04185	0.0346748	-0.0085655	-0.219474	0.596058	-0.335535
YMR306W	FKS3	D	-0.0249607	0.0273602	-0.232803	0.225039	0.470547	0.38798
YMR306W	FKS3	U	0.372766	0.13944	0.426285	0.0354012	0.749499	0.405181
YPL221W	FLC1	U	0.755531	0.29415	-2.3653	0.836298	0.584824
YPL221W	FLC1	D	-0.137692	0.663993	0.22742	-0.143265	0.918479	-0.129571
YAL053W	FLC2	U	-0.395657	-0.176226	0.956785	-0.238097	-0.0479765	-0.135651
YGL139W	FLC3	D	0.27605	0.662615	0.822565	0.308019	0.701557	-0.0518572
YGL139W	FLC3	U	1.038	0.703727	-0.00972464	-0.724659	0.974268	0.510304
YAR050W	FLO1	D	-1.03798	-0.686542	-1.36512	0.886033	-0.812283	1.50539
YAR050W	FLO1	U	0.240619	0.365032	0.815339	0.574181	0.603945	-0.575292
YKR102W	FLO10	D	0.24416	-0.0886968	-0.430111	-0.142278	0.421918	-0.366164
YKR102W	FLO10	U	0.897056	0.683584	0.522324	0.626253	0.961543	0.395374
YER109C	FLO8	D	-0.366792	-0.00719739	0.201986	0.227451	1.35901	-0.560994
YER109C	FLO8	U	0.414019	0.625361	0.108939	0.357959	0.437294	0.411345
YBR008C	FLR1	U	0.0231602	0.102978	0.594169		0.944959	-0.0629617
YBR008C	FLR1	D	-0.569528	-0.138377	-0.173194	-0.323843	0.223886	0.185763
YIL098C	FMC1	U	-0.0295888	-0.671106	0.0482137
YIL098C	FMC1	D	-1.15409	0.0742176	1.68124		0.481463	-3.6274
YHR176W	FMO1	D	0.201646	-0.290884	0.603639	1.36652	0.861352	1.06312
YHR176W	FMO1	U	-3.13115	-1.53863	-1.81485	0.0510603	-2.6405	-0.0358149
YER182W	FMP10	D	0.447787	-2.30104	0.629308	0.156338	-0.0704883	0.0423514
YER182W	FMP10	U	-0.872593	-0.016124	-0.709565	0.250935	-0.680707	-0.123617
YHL021C	FMP12	U	2.48844		-0.192666		0.77374
YHL021C	FMP12	D	-0.312308	0.947163	0.851835	0.131617	0.514594	-0.432733
YKR016W	FMP13	D	0.752151	-0.0774272	-0.284686	-0.0135588	-1.19817	-0.958858
YKR016W	FMP13	U	0.0548096	0.400452	-0.435919	-0.301681	-0.610992	-0.651121
YPL099C	FMP14	D	0.60375	-0.569967	-0.246267	0.343759	-0.472875	-0.4569
YPL099C	FMP14	U	-0.405599	0.670488	0.0444769	-1.02399	-0.332273	0.441623
YDR070C	FMP16	D	-0.785719	0.517791	-0.204539	-0.490969	-0.153227	-0.59156
YDR070C	FMP16	U	-0.505113	-0.101848	-0.140629	0.00953696	-0.203506	-0.206323
YBR269C	FMP21	D	-0.764852	0.964245	1.339	1.03973	0.389686	0.511692
YHR198C	FMP22	D	-0.383671	-0.576891	-0.957973	0.525512	-0.432563	1.02376
YHR198C	FMP22	U	0.0885872	-0.441132	-0.266209	-0.215703	0.53508	-0.229114
YBR047W	FMP23	D	-0.389132	-0.663113	-0.6548	-0.510034	0.117681
YBR047W	FMP23	U	0.0696081	0.101274	-0.695259	-0.0910476	0.032324	0.0890926
YMR115W	FMP24	D	-0.0466342	-2.16232	-0.17085	-0.49916	0.0331981	-0.826127
YMR115W	FMP24	U	0.859275	0.664227	-0.351973	-0.200621	0.677758	1.01475
YLR077W	FMP25	D	0.590522	-0.663389	-0.733724	0.919614	0.328205	0.18435
YLR077W	FMP25	U	0.970526	-0.254339	0.00970986	0.622388	0.815803	-0.220565
YJR080C	FMP26	D	0.14379	-0.313709	-0.0254694	-0.0328362	0.109043	0.143496
YJR080C	FMP26	U	-0.575584	-0.87258	-0.468443	0.0349169	-0.788269	1.04728
YLR454W	FMP27	D	-0.586406	-0.39525	-0.621613	-0.184334	0.0208982	0.223898
YLR454W	FMP27	U	-1.58394	-0.928243	-1.16438	-0.696022	-1.08129	-0.221367
YER080W	FMP29	D	0.958181	0.374032	0.175855		-0.18289	0.41233
YER080W	FMP29	U	0.657308	0.217507	1.02761	1.08512	0.607848	0.463591
YPL103C	FMP30	D	-0.601733	0.45117	-0.248505	0.126862	-0.3599	-0.339758
YPL103C	FMP30	U	0.587911	0.43634	-0.0313069	-0.771921	0.265161	0.186419
YOR286W	FMP31	D	0.0697747	-0.231746	0.575203	0.714465	-0.0099856
YOR286W	FMP31	U	-0.343658	0.584805	-0.931385	2.01776	-1.26394	0.728759
YFL046W	FMP32	D	-0.245059	0.287889	-0.0419294	0.758779	0.160797	1.04473
YFL046W	FMP32	U	0.446927	0.284001	0.298138	0.0990724	0.812654	-0.0641175
YJL161W	FMP33	D	0.113227	0.881137	-0.0212654	0.26617	-0.424424	0.16868
YJL161W	FMP33	D	-0.0430083	-0.317121	-0.282596	0.338143	0.334139	0.0139764
YJL161W	FMP33	U	-0.857764	-1.01205	-0.754829	-0.17357	-1.51568	0.762822
YHR199C	FMP34	D	-0.341538	-0.20621	-0.196429	0.402617	0.360016	-0.0557272
YHR199C	FMP34	U	-0.0231885	0.128067	0.00267627	0.472596	-0.797082	-0.211463
YIL157C	FMP35	U	1.20899	-0.26195	-1.68098	-0.0929002	-0.646488	-0.826455
YDR493W	FMP36	D	0.344886	1.25312	1.31703	1.88447	1.0304	-0.858937
YDR493W	FMP36	U	-0.281464	0.0528552	-0.0625289	1.01997	0.17257	0.162463
YGL080W	FMP37	U			-0.0117384		-1.15427	-2.7222
YGL080W	FMP37	D	-0.296829	1.54633	0.0403652	-2.37657	0.00671065	-1.77385
YMR157C	FMP39	D	0.631586	0.433388	0.222218	0.390612	-0.0998064	-0.184311
YMR157C	FMP39	U	0.165686	-0.369098	0.459738	0.201158	-0.0276189	0.526592
YPL222W	FMP40	D	0.720715	0.549898	0.721524	1.76057	0.4457	0.737064
YPL222W	FMP40	U	0.00896074	0.44026	-0.523543	0.401478	0.0703367	0.369469
YNL168C	FMP41	D	-0.168501	-0.0294195	-0.707712	-0.176578	-1.21778	-0.154848
YNL168C	FMP41	U	-0.878556	0.633447	-0.448338	-1.01968	0.073148	-0.970281
YMR221C	FMP42	D	0.510673	-0.331441	0.362352	-0.0909764	0.301914	-0.548998
YMR221C	FMP42	U	0.133435	0.703892	0.48112	0.196903	-0.00462317	0.109067
YGR243W	FMP43	D	-0.441066	-0.981011	-0.510347	-0.592671	0.22293	-0.311907
YGR243W	FMP43	U	-0.858649	0.727321	-1.52638	-0.789413	-0.873764	1.31264
YDL222C	FMP45	D	0.537662	-0.198588	0.668428	-0.298517	0.230941	-0.31042
YDL222C	FMP45	U	1.18464	-0.393379	0.820969	0.0217743	0.531121	0.42812
YKR049C	FMP46	D	-0.419833	-0.59261	-0.0328521	0.958069	0.277096	0.459299
YKR049C	FMP46	U	-0.0130948	-0.700748	-0.012601	0.0206233	-0.0979142	-0.629745
YGR052W	FMP48	D	-0.160666	0.118241	0.486975	0.147511	0.172913	0.556077
YGR052W	FMP48	U	-0.0930499	0.0251444	0.832376	0.539263	0.462803	-0.166357
YER038W-A	FMP49	D	0.975659	-0.300607	0.621635	-0.102376	0.973693	-0.441532
YER038W-A	FMP49	U	-0.100467	0.0706091	0.370972	-0.15381	0.358637	-0.716918
YKR027W	FMP50	D	0.0590128		1.48666	-1.80858	1.1162	-0.233666
YKR027W	FMP50	D	-1.47045	-0.844037	-0.613112	-1.77118	0.387534	-0.227053
YKR027W	FMP50	U	-0.941938	0.194782	0.628339	-1.20039	0.671416	0.542569
YBR262C	FMP51	D	0.171545			-1.01453	0.533447
YBR262C	FMP51	U	0.755605	0.573661	0.478993		0.851975	0.24779
YMR020W	FMS1	U	0.155179	-0.639434	-0.159093	-0.187024	0.247782	0.427485
YBL013W	FMT1	U	-1.01221	-2.60758	-1.15592	-2.20634	-2.91016	-1.20216
YDR110W	FOB1	D	-0.730518	0.727198	-0.684924	-0.827552	-0.0339176	-1.18932
YDR110W	FOB1	U	-0.339048	-1.18726	-0.288452	0.217053	-0.844713	0.494771
YKR009C	FOX2	D	0.5082	0.247476	-0.45557	-0.443266	0.535514	-0.581493
YKR009C	FOX2	U	0.0213492	0.44037	-1.01732	-0.202515	-0.21515	0.00906187
YNL135C	FPR1	D	-0.936518	-0.52562	0.116179		1.38213
YNL135C	FPR1	U	-0.422907	-0.355726	1.38543	-0.759206	0.757909
YDR519W	FPR2	U	0.044733	0.693565	-0.046852	0.546973	0.892688
YDR519W	FPR2	D	0.0149202	0.387094	-0.752164	1.05755	0.381368	0.977231
YML074C	FPR3	D	0.30025	0.0725461	0.412023	0.413755	0.118407	-0.0257828
YML074C	FPR3	U	0.417688	-0.291813	0.0852371	0.27739	0.495383	0.709723
YLR449W	FPR4	D	-0.106424	-0.0712876	-0.828394	0.557433	-0.597049	0.729144
YLR449W	FPR4	U	0.0733935	-1.22229	0.145387	-0.291248	0.498237	0.448172
YLR214W	FRE1	D	-0.578854	0.399223	0.163512	3.68747	0.252438	2.72048
YLR214W	FRE1	U	-1.52946	-2.66698	-1.74048	-0.294904	-1.04399	0.0593788
YKL220C	FRE2	D	-0.0208808		-0.47596	0.507546	-0.156756
YKL220C	FRE2	D	-0.32224	0.467645	0.0384489	-0.12622	0.347731	-0.834374
YKL220C	FRE2	U	-0.563813	-1.0485	-1.08273	0.00906617	-0.259054	0.787976
YOR381W	FRE3	U	-0.208642	0.351217	1.71458		0.181696	0.12528
YOR381W	FRE3	D	0.135087	0.254949	1.31389	0.581553	-0.151493	0.628596
YOR381W	FRE3	U	-0.01155	-0.0793058	0.816868	-0.0296698	-0.114769	0.0836105
YNR060W	FRE4	D	-0.553038	-0.394556	-0.0802694	-0.122497	0.120174	-0.016891
YNR060W	FRE4	U	-0.666912	-0.120386	0.452239	-0.229989	0.0571732	-0.0113399
YOR384W	FRE5	U	-0.27462	-0.0840892	0.468728	0.130927	0.320775
YOR384W	FRE5	D	-0.295981	-0.925242	0.0332288	-0.129158	0.341942	-0.0892216
YLL051C	FRE6	U	1.20461	0.234493	0.489616	1.10977	0.585808	0.506806
YOL152W	FRE7	D	0.511034	-0.95539	0.878768	0.150324	-0.0247778	0.744947
YOL152W	FRE7	U	0.552183	1.0378	0.892036	-0.0579821	1.0204	0.798773
YLR047C	FRE8	U	0.290332	1.13458	-0.453069	-0.0175902	0.105051	-0.287097
YCL026C-A	FRM2	D	-0.0479594	-0.323143	0.433341	0.633038	-0.261979	-0.718533
YCL026C-A	FRM2	U	0.687422	-0.234248	0.348789	-0.0736381	0.844493	0.864686
YOR324C	FRT1	D	-0.764833	-0.00552544	0.139147	0.377402	0.725247	-0.206359
YOR324C	FRT1	U	-0.10486	-0.447645	0.256732	0.721533	0.251176	0.329097
YAL028W	FRT2	U	0.729603	0.240347	0.899293	-0.682186	0.765118	0.880437
YHR049W	FSH1	D	-0.893601	1.15457	-1.32543	-0.180328	-0.139914	-0.942006
YHR049W	FSH1	U	0.605817	-0.413665	-0.53508	1.27858	-0.468764	0.103108
YMR222C	FSH2	D	0.553596	-0.687032	0.568768	-0.30876	0.32346	-0.497428
YMR222C	FSH2	U	0.284591	0.371104	-0.133015	-0.505547	-0.199471	0.687679
YOR280C	FSH3	D	0.10148	-0.565434	-0.164675	0.2212	0.271865	0.972621
YOR280C	FSH3	U	-0.225774	0.12806	-0.759813	0.322313	0.162539	0.512514
YBR207W	FTH1	D	0.32694	-0.194727	-0.137315	-1.22921	0.221113	0.204209
YBR207W	FTH1	U	-0.102591	-0.475993	-0.400171	0.513453	0.393289	-0.54538
YER145C	FTR1	D	0.953984	0.31302	-0.242481	0.079748	0.869786	-0.160076
YER145C	FTR1	U	-0.574759	0.0874764	-0.0611783	0.457173	-1.00832	0.636441
YAL008W	FUN14	U	0.747904	-0.190254	-0.25054	-0.0572642	-0.107475	-0.658144
YAL034C	FUN19	U	-0.030951	-0.00610176	-0.691256	-0.0249719	-0.295078	0.202116
YAL022C	FUN26	U	0.562099	0.297607	1.02464	0.290386	0.437676	0.0837827
YAL019W	FUN30	U	0.0194541	0.256861	0.679707		0.475591	-0.427545
YCL027W	FUS1	U	0.811202		0.562439		0.315506	-0.992535
YCL027W	FUS1	D	0.630064	0.764379	-0.201474	-1.15787	0.64492	-0.470179
YMR232W	FUS2	D	0.702713	-0.0258939	0.190726	0.692115	0.527419	-0.228376
YMR232W	FUS2	D	0.0604968	0.0168957	-0.00372918	0.341129	0.210993	-0.0588371
YMR232W	FUS2	U	-0.383619	-0.19096	-0.179867	-0.523885	0.245974	-0.0786651
YCL058C	FYV5	D	-2.41226	-0.684601	-3.18692		-2.22947
YCL058C	FYV5	U	3.31717	1.99031	3.12661		2.88877
YGL254W	FZF1	D	0.0687927	-0.892547	-0.302547	0.212191	-0.23932	1.65794
YGL254W	FZF1	U	-0.702839	-0.547697	-0.18293	-0.657643	0.266477	0.218119
YGL254W	FZF1	U	0.183379	-0.168487	-0.293661	-0.56946	0.32229	-0.190252
YOR178C	GAC1	D	1.27518	0.972779	-0.0690718	1.1723	-1.09237	-0.113483
YOR178C	GAC1	U	-0.496991	0.221035	-0.578924	-1.00008	-1.27618	-0.0652621
YMR250W	GAD1	D	0.322022	0.790714	0.306	-0.0030311	-0.0950538	-0.639142
YBR020W	GAL1	U	2.01362	0.351421	1.14132	0.888372	-0.246712
YBR020W	GAL1	D	0.463565	-0.0363688	-0.0804338	-0.746774	-0.202421	0.688325
YBR020W	GAL1	D	1.04921	-0.136492	-0.18045	-0.127688	-0.0164907	0.520987
YBR020W	GAL1	U	-0.139846	0.438052	-0.768706	-0.241549	-0.238978	1.62133
YBR020W	GAL1	U	0.815984	0.164092	1.6474	-0.00421703	-0.266545	1.63147
YBR019C	GAL10	D	0.418361	0.0444722	-0.606175	-0.673172	0.0256076	0.522641
YBR019C	GAL10	U	-1.97147	-0.325246	-0.859106	0.404838	0.301009	1.21874
YLR081W	GAL2	D	0.0980438	-0.252159	0.508811	-0.254189	0.829989	-0.279239
YLR081W	GAL2	U	0.160294	-0.329512	1.00464	-0.193794	0.858771	-0.630309
YDR009W	GAL3	D	0.205939	0.189596	0.56613	0.101882	-0.181681	-0.46709
YDR009W	GAL3	U	1.08589	0.700111	0.859802	-0.327692	0.601319	0.328023
YPL248C	GAL4	D	0.232553	-1.1876	-0.0265247	0.220483	0.495601	0.0295882
YPL248C	GAL4	U	0.414384	1.09554	0.415717	-0.518824	-0.135927	-0.292134
YBR018C	GAL7	U	0.580488	0.542866	0.172442		0.833869	0.615414
YBR018C	GAL7	D	0.298027	-0.18341	1.37247	-1.11319	1.11363	-0.128143
YML051W	GAL80	U	0.113323	0.657529	0.359248	-0.293235	0.0813496	0.387791
YER027C	GAL83	D	-1.07611	0.848745	0.53362	-0.728194	0.307671	-1.08847
YER027C	GAL83	U	-0.126507	-0.269159	-0.136222	-0.443638	0.0498035	-0.456265
YKR039W	GAP1	D	-0.382628	1.29221	-0.168316	0.441083	0.764604	-0.0171454
YKR039W	GAP1	U	-0.00821266	-0.178207	0.121486	-0.0945803	-0.188737	0.584917
YLR343W	GAS2	D	0.0262526	-0.344824	0.248049	0.0495458	0.0641256	-0.406667
YLR343W	GAS2	U	1.32038	1.12358	1.07683	0.0967514	1.29398	-0.0106645
YMR215W	GAS3	U	0.244907	0.19424	-0.52632	0.45624	-0.522245	-0.159401
YOL132W	GAS4	D	-0.170217	0.0552766	-0.0858498	-0.169737	-0.426453	0.653865
YOL132W	GAS4	U	-0.140938	-0.444813	-0.316255	0.164962	-0.360795	0.666257
YOL030W	GAS5	D	0.695254	0.0143039	0.653791	0.71247	0.156337	-0.220719
YOL030W	GAS5	U	2.01597	0.384086	2.86925	2.0387	1.56011	2.18716
YFL021W	GAT1	D	0.306937	0.108446	0.356687	0.535836	-0.059245	1.27209
YFL021W	GAT1	U	2.14739	1.35372	2.30707	1.11978	1.7073	2.31363
YMR136W	GAT2	D	0.645719	0.929136	0.64287	0.618295	0.172281	0.559164
YMR136W	GAT2	U	0.779757	0.741652	0.472994	0.461133	0.127286	-0.349217
YLR013W	GAT3	D	0.279311	0.300214	0.149136	0.204263	0.0705484	-0.955921
YLR013W	GAT3	U	0.0138027	0.614788	0.781115	0.0972645	0.905766	-0.339285
YIR013C	GAT4	D	-0.177572	0.34401	0.569494	-0.116832	-0.401632	-0.720442
YIR013C	GAT4	U	-0.0380791	0.195709	0.494791	0.0417834	0.213704	0.283244
YCL011C	GBP2	D	-0.598545		-1.21047	-0.768333	0.502415
YDR283C	GCN2	D	-4.17704	-0.687593	-4.20874	-1.80469	-2.11935	-1.21984
YFR009W	GCN20	D	0.603974	-0.357344	-1.24096	-1.51325	-0.88073	-1.37226
YFR009W	GCN20	U	0.645468	-0.698694	-0.496471	-1.38367	-0.702586	-1.54703
YKR026C	GCN3	D	-0.23396	-0.427777	-3.86684	-6.71037	-8.49639	-5.96012
YKR026C	GCN3	U	-0.762809	0.250871	-4.47124	-6.42146	-6.05757	-7.0673
YEL009C	GCN4	U	-3.02619				-0.644861	-4.89856
YDR019C	GCV1	D	-0.638507	0.499643	-0.680682	-0.918095	0.369043	-0.00511182
YDR019C	GCV1	U	0.397289	0.429997	-0.28465	-0.275104	0.292471	-0.202771
YMR189W	GCV2	D	0.354612	-0.487997	-0.393049	0.838598	0.0769588	-0.922664
YMR189W	GCV2	U	-0.587561	-0.376052	0.752661	-0.0719823	0.116814	-0.425422
YOR120W	GCY1	D	-0.0325492	0.64731	0.256791	-0.131105	-0.312898	0.173489
YOR120W	GCY1	U	-0.295719	0.107534	-0.00647756	0.52402	-1.01489	0.60582
YOR120W	GCY1	U	-0.403885	1.43839	1.10972	2.28983	0.595686	0.584797
YEL042W	GDA1	D	1.36631	-2.94493	1.20495	-0.215384	0.432545	-0.458807
YEL042W	GDA1	U	0.146261	1.24864	0.876341	0.460755	-3.19534	-0.80098
YPR184W	GDB1	U	1.41544	0.278595	0.644304		0.343344	0.247867
YPR184W	GDB1	D	-0.0398663	-2.59626	0.236796	0.565525	0.217563	0.180749
YPL110C	GDE1	D	-0.0993301	0.0835004	-0.147705	0.201029	-0.0463885	-0.0992743
YPL110C	GDE1	U	-0.0656634	-0.341263	-0.155607	-0.037252	-0.540538	0.317389
YOR375C	GDH1	D	-0.412609	0.698529	0.12801	-0.447752	0.994479	-0.498468
YOR375C	GDH1	U	-0.0656429	0.148733	-0.266817	-0.22237	-0.583945	0.195973
YDL215C	GDH2	D	0.0686713	-0.363781	0.142374	-0.657198	-0.421865	-0.120266
YDL215C	GDH2	U	-0.0832223	-0.203204	0.233715	-0.139674	0.837724	0.00355487
YAL062W	GDH3	U	0.423753	0.67597	-0.790099	-0.991294	0.94966	-0.474785
YOR355W	GDS1	U	-0.837921		0.830185		0.404267	-0.297883
YOR355W	GDS1	D	-0.0222888	-1.57747	-0.00543427	0.490108	-3.1693	-2.24468
YJR031C	GEA1	D	-0.310743	-0.254107	-0.789084	0.225756	0.55409	-0.687025
YJR031C	GEA1	U	-0.132592	0.0516899	0.135106	-0.115527	0.0143704	-0.149259
YJR040W	GEF1	D	0.583068	0.627631	-1.30639	1.08304	-0.127596	-1.0659
YJR040W	GEF1	U	-0.224727	0.755578	-0.442472	1.39552	0.458797	-0.0446973
YAL048C	GEM1	U	0.170034	0.817094	0.831308	1.48244	0.50833	-0.0588991
YDL100C	GET3	D	-3.43506	0.860341	-0.423185	-1.8053	-1.88906	-0.121581
YMR255W	GFD1	D	0.870468	0.0627164	0.292993	-0.301635	-0.260632	0.370163
YMR255W	GFD1	U	-0.682569	-0.469662	-0.330942	-0.131966	-0.272941	0.502407
YCL036W	GFD2	D	-1.25923	0.983249	0.848707	-1.08587	0.272277	0.378802
YDR358W	GGA1	D	0.821858	-0.144074	-0.562436	0.23991	-0.706576	-0.0144204
YDR358W	GGA1	U	0.273027	-0.30301	0.041806	-0.384368	0.249579	0.365013
YHR108W	GGA2	D	0.317026	0.970941	1.39107	0.288473	1.62212
YHR061C	GIC1	D	-0.743399	-0.737795	0.222132	-0.32451	0.0303596	0.235619
YHR061C	GIC1	U	-0.716201	0.815304	-0.627935	0.371647	0.72288	-0.60247
YDR309C	GIC2	D	0.391608	0.551837	0.917791	0.150197	1.11012	-0.519987
YDR309C	GIC2	U	0.170763	-0.198884	1.2991	-0.000809995	0.119052	0.521615
YCL039W	GID7	U	0.3402			-2.45873		-1.69892
YMR135C	GID8	D	1.62675	0.584256	0.557101	-1.86005	-1.46046
YDR507C	GIN4	D	-1.8716	-1.06787	-1.20655		-0.887964
YBR045C	GIP1	D	-0.650362	-0.667211	-1.1751	-0.570778	-0.393256	0.0621292
YBR045C	GIP1	U	-0.0410373	-0.834109	0.467643	0.302625	0.404248	0.380883
YPL137C	GIP3	D	0.581431	-1.92668	-0.832272	2.72387	-0.245169	3.72012
YPL137C	GIP3	U	0.95437	0.0167016	0.663654	0.726863	0.55273	-0.0739281
YAL031C	GIP4	U	0.234097	-0.467806	0.913587	0.924918	-0.180715	0.738036
YDR152W	GIR2	D	-0.198885	-0.124985	0.268396	-0.781977	-0.483059	0.546236
YDR152W	GIR2	U	-0.784542	-0.812402	-0.445006	-0.945742	-0.927755	0.0453252
YDR096W	GIS1	D	-0.418421	-0.431987	-0.516088	-1.26744	-0.432291	-0.955036
YDR096W	GIS1	U	0.100337	1.64416	0.848577	-0.442496	0.366742	0.0187962
YDR096W	GIS1	U	0.098188	-1.23174	-0.173674	-0.386198	-0.467919	-0.875714
YNL255C	GIS2	D	0.0123738	-0.582706	-0.610891	-0.590149	-0.0221463	-0.162271
YNL255C	GIS2	U	0.531319	0.304906	0.47266	-0.606022	0.146356	0.0794823
YLR094C	GIS3	D	1.10482	-0.124868	-0.180888	-0.1278	0.160252	0.0725129
YLR094C	GIS3	U	1.14917	0.579729	0.351526	0.151981	0.416587	0.20223
YML006C	GIS4	U	-1.73887	-7.43683	-1.35903	3.89218	-1.22086	2.78886
YCR098C	GIT1	D	2.15961	2.36902	-0.0910948	-0.887597	-0.357269	-0.517278
YCR098C	GIT1	U	0.0623359	1.27284	0.541656	3.58438	0.681387	0.861754
YEL011W	GLC3	D	-0.453502	0.0401043	-0.255199	-0.916147	-0.237559	-0.795651
YEL011W	GLC3	U	0.258248	0.500981	0.508725	0.117293	-0.0372854	-0.401375
YMR311C	GLC8	D	-0.436788	-0.637086	0.610175	-0.15806	-0.657259	-0.303008
YMR311C	GLC8	U	-0.641648	-1.89142	-0.182839	-0.85386	-0.479177	-0.438627
YKR058W	GLG1	D	-0.254112	-0.236115	-0.525869	-0.217491	-0.344081	0.0978682
YKR058W	GLG1	U	-0.957074	-0.41533	-0.956196	-0.525186	-0.32999	-0.217595
YJL137C	GLG2	D	0.551306	-0.594735	0.230998	0.417533	0.679713	-0.0722827
YJL137C	GLG2	U	-0.179755	-0.490218	-0.807403	0.667245	-0.395222	0.0702316
YCL040W	GLK1	D	0.796752	-0.30967	1.34232	-0.997775	0.588527	0.558383
YML004C	GLO1	U	0.627087	0.879874	1.08293	0.649658	0.985072	0.35644
YDR272W	GLO2	U	-2.78433	0.668849	-0.211376	-0.229627	-0.12621
YDR272W	GLO2	D	-0.771941	-0.476331	-0.610706	0.250201	0.419022	0.788313
YOR040W	GLO4	D	-0.0131425	0.281292	0.28522	0.0113638	-0.46636	-0.319708
YOR040W	GLO4	U	0.142762	0.116962	0.0251809	-0.321459	-0.15278	-0.240358
YPL091W	GLR1	U	-0.530627	0.142308	0.0338488	0.534024	-0.487293
YDL171C	GLT1	D	-0.791099	-0.687141	-0.155627	-0.497572	-0.385897	-0.241353
YDL171C	GLT1	U	0.183467	-0.19994	0.347538	-1.17066	0.500932	-1.26279
YKR030W	GMH1	D	1.52382	0.408587	2.13403		1.59916	-0.647235
YKR030W	GMH1	D	0.0914886	0.711467	-0.995144	0.0177344	0.443128	-0.274033
YKR030W	GMH1	U	-0.220895	-0.446331	-0.265561	0.134946	-0.722671	0.814533
YGR256W	GND2	D	-0.784846	0.00594798	-0.509425	-0.23617	-0.26547	0.124176
YGR256W	GND2	U	0.290548	-0.958334	0.16473	-0.0191182	0.996151	-0.479498
YDR508C	GNP1	U	0.576797	-0.295833	-0.758525	-0.441042	-0.394909	-0.470626
YOR320C	GNT1	D	0.126466	-0.609345	0.372574	1.21221	-0.0447597	1.20293
YOR320C	GNT1	U	0.073667	0.121475	0.276066	0.175022	0.831246	-0.430657
YMR292W	GOT1	D	0.126386	0.115628	-0.111338	0.784228	0.192886	0.0661114
YMR292W	GOT1	U	-0.0988841	0.683987	-0.0102517	-0.131204	0.152085	-0.0257003
YER020W	GPA2	D	0.0810593	1.7147	0.149679	-0.60171	1.07797	-1.51088
YER020W	GPA2	U	-1.07887	3.36715	1.57469	-0.767272	2.1794	-0.756933
YOR371C	GPB1	D	-1.51211	-0.372613	-0.294048	1.02111	-1.81227	0.105403
YOR371C	GPB1	U	0.150438	-0.281127	0.0609871	1.07464	0.197338	0.952207
YAL056W	GPB2	U	0.861438	-0.780424	0.259518	0.875965	-1.13177	0.944849
YDL022W	GPD1	D	2.56531		0.959294	-0.330845	-0.252536	-0.739162
YDL022W	GPD1	U	-1.59707	0.691569	-0.978492	-1.89099	0.966784	-0.536583
YOL059W	GPD2	D	-0.771334	0.599618	0.433899	2.16838	1.05098	0.977808
YOL059W	GPD2	U	2.75092	-0.92471	-1.14211	1.50316	-1.11051	-0.194194
YGL121C	GPG1	U	0.647327		-0.384872			0.0852974
YGL121C	GPG1	D	-0.00317442	1.08701	0.778657	-0.778424	0.295854	-0.103727
YPR160W	GPH1	D	0.0753426	-0.578702	0.365829	1.56572	0.274852	0.0523755
YPR160W	GPH1	U	-0.294674	0.0809397	0.238036	0.221432	-0.256092	-0.19566
YDL021W	GPM2	D	-0.239745	0.605538	-0.355912	-0.409598	0.20342	-0.301508
YDL021W	GPM2	U	0.413488	-1.29034	-1.41752	0.586175	-0.778619	0.262171
YOL056W	GPM3	U	-0.526938	0.286775	-0.533169	0.410389	0.761059	0.236329
YDL035C	GPR1	D	-0.5858		1.66783	-0.512338	3.0616	-1.56055
YKR067W	GPT2	D	-0.600004	-0.129895	-0.210673	0.422905	-0.59345	1.28047
YKR067W	GPT2	U	-0.705826	-0.965277	-0.346015	-0.25824	-0.504799	-0.227862
YKL026C	GPX1	U	0.360384	-0.156421	0.899782		0.76061
YKL026C	GPX1	D	0.211185	-1.07557	1.50173	0.15037	-0.053209	-0.291396
YBR244W	GPX2	D	0.308298	-0.0519249	-0.214065	-0.293151	-0.21582	0.0236689
YBR244W	GPX2	U	0.510059	0.385872	0.839142	-0.0669748	0.632018	0.493826
YPL223C	GRE1	D	0.342118	1.04179	1.08237	0.778361	-1.62786	0.251494
YPL223C	GRE1	U	-0.402773	-1.79165	-0.405416	0.76636	-0.424567	0.395088
YOL151W	GRE2	D	-0.169686	-0.637658	-0.375176	-0.0647329	-0.14298	0.280786
YOL151W	GRE2	U	0.0539386	-0.5821	-0.199092	0.507151	0.323299	0.502571
YHR104W	GRE3	D	2.98205	1.1681	1.57378	0.463639	1.65103	-1.32049
YHR104W	GRE3	U	0.646695	0.54816	1.75557	0.0321195	-0.735527	-0.170677
YDR517W	GRH1	D	-0.367716	-0.286136	-0.442724	-0.521214	0.231173	-0.0694398
YJR090C	GRR1	D	-1.01189	0.715997	-0.310591		-0.146926
YJR090C	GRR1	U	1.1076	1.11928	1.65169		1.29274
YCL035C	GRX1	D	-0.613717	-0.318628	-0.719965	-0.245349	-0.23257	0.434755
YCL035C	GRX1	U	-0.477069	-0.0819151	-0.526622	0.297857	0.196435	0.145644
YDR513W	GRX2	D	0.115047	-0.72848	0.584054	0.0221258	0.608336	-0.254171
YDR513W	GRX2	U	-0.327791	1.08376	-0.54383	-0.572132	0.872921	-0.667452
YDR098C	GRX3	D	-1.1038	0.440808	-0.158113	-0.48616	-0.240858	-0.607682
YDR098C	GRX3	U	0.565683	0.172459	-0.768348	-0.491937	-0.0215274	-0.419305
YER174C	GRX4	D	2.17133	1.01261	0.466948	0.102431	-1.36763	0.515056
YER174C	GRX4	U	0.362618	-0.408184	-0.419822	0.48924	-1.52378	0.401865
YGR032W	GSC2	D	0.572846	-0.582945	0.179223	0.392791	0.780123	0.252118
YGR032W	GSC2	D	0.784484	-0.715576	0.115482	0.536486	1.05062	-0.296207
YGR032W	GSC2	U	0.395378	-0.727558	-0.808107	0.351834	0.590914	-0.428039
YDR108W	GSG1	D	-0.820415	0.238525	-1.33335	-0.681193	-0.456673	-1.69042
YDR108W	GSG1	U	-0.816739	-0.0987283	-0.754582	0.568753	-0.02405	-2.05005
YDR108W	GSG1	U	0.370618	-0.164666	-1.04283	0.809567	-0.616971	0.187911
YJL101C	GSH1	D	0.53267	0.00417031	-1.64886	-1.09888	-0.0988178	1.12975
YJL101C	GSH1	U	0.843918	-0.136075	0.678228	-0.0563068	0.917961	0.37766
YOL049W	GSH2	D	-0.269023	-0.0153065	0.990758	1.01018	0.464379	-0.757559
YOR185C	GSP2	D	-0.573545	0.378761	0.0813546	0.441724	0.494555	0.055756
YOR185C	GSP2	U	1.01593	0.218193	0.283546	0.466388	1.11921	1.24636
YFR015C	GSY1	D	-0.318236	0.529082	0.131274	-0.894091	-0.357944	-0.159955
YFR015C	GSY1	U	0.169747	1.03762	0.923184	0.117644	0.850038	-1.95224
YLR258W	GSY2	D	0.723084	0.00385113	0.0458691	0.609377	1.04031	0.250508
YLR258W	GSY2	U	-0.298775	-0.344203	-0.404882	0.394891	-0.836107	0.134271
YDR221W	GTB1	D	0.277295	-0.651883	-1.11586	0.706874	-0.625762
YGR154C	GTO1	U			-0.16214	-1.75845	0.094513	-0.108314
YGR154C	GTO1	D	-0.492214	-0.853245	-0.629098	0.0818272	0.280134	-0.361671
YMR251W	GTO3	D	-0.199129	-0.868474	-0.653683		-0.140931
YMR251W	GTO3	U	0.214357	0.518551	0.716864	1.00346	1.06112	0.27299
YGL181W	GTS1	D	-0.504723	-0.986923	-0.270964	0.165228	-0.263708	1.85091
YGL181W	GTS1	U	0.265867	-0.261428	-0.376957	0.419729	0.975413	-0.835029
YIR038C	GTT1	D	-0.850341	-0.146746	-0.358172	-0.0286272	-0.220001	0.607502
YIR038C	GTT1	U	-0.784405	-0.470829	-0.965403	0.372977	-0.29703	0.268745
YLL060C	GTT2	D	0.328187	0.931919	1.1326	5.60149	1.06919	1.70907
YLL060C	GTT2	U	0.338428	0.108248	0.883684	-0.264393	0.199241	-0.201546
YEL017W	GTT3	D	-0.176172	0.36381	0.545262		0.443403	0.104012
YEL017W	GTT3	U	-0.379225	0.663316	-0.198217	-1.47031	0.838082	0.534632
YDL238C	GUD1	D	0.399813	-0.522699	-0.297171	-1.01201	0.852165	0.475034
YDL238C	GUD1	U	-0.0403613	-0.398782	-0.726266	-0.898655	-0.326178	0.155966
YLR289W	GUF1	D	1.36759	2.04174	1.32307	0.970043	0.978825	-0.985549
YLR289W	GUF1	U	-0.145594	-0.688715	-0.552213	0.593044	0.711484	-0.123116
YPL189W	GUP2	D	0.139696	-0.558761	-0.523596	0.10515	0.0937999	0.8471
YPL189W	GUP2	U	-0.325407	0.107908	-0.202257	-0.391369	-0.555734	-0.473456
YHL032C	GUT1	D	-0.245738	-0.983201	-0.456705	-0.138891	-0.281433	0.298626
YHL032C	GUT1	U	-0.199173	-0.401873	-0.109968	0.280699	-0.252066	0.709414
YIL155C	GUT2	D	-0.0141326	0.281933	0.397628	0.104581	-0.360468	-1.15151
YIL155C	GUT2	U	-0.901417	-0.781533	-0.443729	0.107919	-1.03575	0.22021
YIL041W	GVP36	D	1.47945	-0.426515	0.279557	-0.546278	-1.91152	-2.40692
YIL041W	GVP36	U	0.494015	0.328251	0.546767	-0.715497	-1.62249	-2.97071
YMR192W	GYL1	D	0.0503215	-0.311802	-0.386857	-0.00594582	0.692173	0.151974
YMR192W	GYL1	U	1.67736	1.09066	1.23844	0.437365	0.811432	0.305292
YOR070C	GYP1	D	-1.79158	1.73755	0.479416	0.282224	-0.119796	-0.795969
YPL249C	GYP5	D	0.242386	0.228311	0.390524	-0.276961	0.0578124	-0.64648
YPL249C	GYP5	U	-0.0946139	-0.710762	0.104809	-0.0706596	0.645309	-0.40027
YJL044C	GYP6	D	-0.243491	0.1819	0.45974	0.256305	0.329292	0.28569
YJL044C	GYP6	U	0.051047	0.0666132	0.0428738	0.240705	0.361563	0.249233
YDL234C	GYP7	U	-0.345379		0.251203		-0.638375
YDL234C	GYP7	D	0.070293	-0.24822	-0.858723	-0.506528	-0.21095	-1.14843
YDL234C	GYP7	U	-0.563379	-0.784212	-0.424086	-0.636269	-0.00794764	-0.0587207
YFL027C	GYP8	D	0.0892028	-0.977629	0.103434	0.957441	0.033371	-0.074781
YFL027C	GYP8	U	0.567175	0.333856	0.138116	-0.101125	0.427601	-0.232163
YJL110C	GZF3	D	-0.985434	-0.559192	0.759185	1.05209	0.590157	-0.0181677
YJL110C	GZF3	U	-0.778793	0.614215	-0.132151	0.289446	0.323189	0.0916021
YPR008W	HAA1	D	0.229979	-0.149464	-0.22247	-0.124013	0.425508	0.267658
YPR008W	HAA1	U	-0.973717	-0.462424	-0.742868	-0.273328	-0.162873	1.17364
YFL031W	HAC1	D	0.890985	0.30294	0.587636	0.49119	-0.224967	-0.0813341
YFL031W	HAC1	U	0.346726	0.150537	0.720721	-0.12928	0.321742	-0.352962
YPR005C	HAL1	D	-0.66567	-0.491754	0.000803254	-0.182155	0.580635	0.318229
YPR005C	HAL1	U	0.110812	-0.526672	0.650932	-0.206804	0.587599	-0.0707881
YJL165C	HAL5	D	-0.0515808	0.68406	-0.0848537	0.630473	0.0442386	0.723245
YJL165C	HAL5	U	-1.34269	0.324434	-0.489385	0.550416	0.105798	0.456607
YOL089C	HAL9	D	0.725424	-1.16889	-1.19404		0.276363	0.343359
YOL089C	HAL9	U	0.492246	-1.63361	-1.86505	-1.92839	-0.954449	-0.551593
YJR069C	HAM1	D	-0.465428	0.993521	0.0553868	0.130019	0.819142	-0.052055
YJR069C	HAM1	U	-0.0961943	0.381566	0.0325556	0.156451	-0.30199	0.10339
YGL237C	HAP2	D	0.773808	-5.23704	0.198072	0.00080068	0.327527	-0.789805
YKL109W	HAP4	D	-0.857516	0.182794	-2.99554		0.198259	-0.965122
YKL109W	HAP4	U	-0.592894	-2.59113	-4.80192	0.397404	-3.74971	0.81596
YOR358W	HAP5	D	1.48499	-0.0726568	0.705767	-0.67794	0.479394	-0.802736
YOR358W	HAP5	U	0.739716	0.957235	-2.30655	-1.70569	-1.4111	0.691877
YPL001W	HAT1	D	-0.180673	-0.199076	-1.00053	0.320581	-0.95958	0.47829
YPL001W	HAT1	U	0.135349	0.586565	-0.192185	0.347193	-0.35036	-0.419207
YEL056W	HAT2	D	-4.02796	-1.49459	-3.66063	-0.204478	-1.44103	-1.18061
YEL056W	HAT2	U	-0.237454	0.0408915	-0.515368	-0.109576	0.713932	-0.424734
YKR084C	HBS1	U	-2.41052	1.79952	-2.0207		-2.08477
YKR084C	HBS1	D	-5.35676	-1.13071	-1.26456	1.56291	0.452669
YDL223C	HBT1	D	-1.24468		-1.61867	1.55193	-0.0708861	3.9505
YDL223C	HBT1	U	0.567716	0.0776492	0.846845		0.239647	0.396212
YNL281W	HCH1	D	-0.206798	0.762167	0.423853	0.77177	0.13383	-0.704937
YNL281W	HCH1	U	-1.00885	0.421359	0.763991	0.283102	-0.731675	2.18617
YNL281W	HCH1	U	-0.567597	0.730491	0.211308	0.288547	-0.390123	0.407921
YCR065W	HCM1	U	4.06163		2.26315			2.7853
YKL017C	HCS1	D	-0.795938	-0.18349	0.962667	0.612759	0.525444	-0.465846
YKL017C	HCS1	U	0.0871445	-0.356909	0.175784	-0.573584	0.235011	-0.0315173
YDR295C	HDA2	D	0.461964	-0.386901	1.07508	-0.741334	0.434621	-0.488239
YDR295C	HDA2	U	0.541711	0.256301	0.321002	-0.0910907	0.78835	0.600215
YPR179C	HDA3	U	-0.51893	-0.449774	1.08995		1.75796	0.867895
YPR179C	HDA3	D	0.244373	-0.254849	0.641824	-0.781567	0.402217	-0.376206
YNL014W	HEF3	D	2.87908		-1.12182		0.21805
YNL014W	HEF3	D	0.790301	0.582079	0.306445	1.31719	0.50417
YNL014W	HEF3	U	-1.66642	-1.29704	-1.40738		-2.03783	2.22645
YBL032W	HEK2	U	0.18359	0.296117	-0.24025	0.0510322	-0.877995
YBL032W	HEK2	D	0.0501803	-0.341575	0.477166	0.307515	-0.463341	0.272331
YOR237W	HES1	D	-1.57732	-0.537479	0.455208	1.73502	-0.138879	0.458285
YMR110C	HFD1	D	-0.572377	0.485387	0.154414	-0.519752	-0.954432	1.08902
YMR110C	HFD1	U	0.201536	-0.345719	1.37922	-0.496794	0.722556	0.102714
YGR187C	HGH1	D	-0.416388	2.70269		-2.88505	0.693975
YBR009C	HHF1	D	-1.74162		-0.510323			0.837423
YBR009C	HHF1	U	-0.984025		-0.697943	-3.21702	-1.38266	-0.683158
YPL127C	HHO1	D	-0.306641	0.00234894	-1.33252	0.333526	-0.551555	0.996699
YPL127C	HHO1	U	0.883829	-0.300537	0.00360286	-1.14883	1.52887	-0.080537
YBR010W	HHT1	D	-0.555888	-1.30504	0.0671187	-0.176508	-0.185957	0.587708
YBR010W	HHT1	U	-0.0404685	-0.461577	-1.05208	-1.4267	-0.149843	-0.799724
YNL031C	HHT2	D	0.0641433			0.943526	-0.739463
YNL031C	HHT2	U	-0.169638	0.120824	-0.131241	0.103843	-0.296738
YDR317W	HIM1	D	1.18366	1.63697	0.0553161	0.612147		1.0851
YDR317W	HIM1	D	-0.106465	-1.42231	1.8137	-0.517928	-3.86169	0.929866
YDR317W	HIM1	U	-0.333556	0.369855	1.60241	1.50163	-1.18869	1.66072
YBL008W	HIR1	D	-0.244036	2.89833	-1.89401		2.71995
YOR038C	HIR2	U	-1.20168		-0.926429		-0.0845906
YOR038C	HIR2	D	1.12616	1.45604	-0.739429		-0.610178	0.836788
YJR140C	HIR3	D	-0.336968	-1.20305	-0.0762429	-1.65666	0.130441	0.712978
YER055C	HIS1	U	0.745801	-0.430164	0.639439	-0.452439	1.17595
YER055C	HIS1	D	0.27643	-0.356265	-0.253859	-0.178554	-0.827897	0.430901
YFR025C	HIS2	D	0.0579804	-0.0982731	0.0508074	-0.0736454	0.0241304	-0.315737
YFR025C	HIS2	D	-0.535868	-0.497684	-0.489234	-0.136315	-0.0160335	0.276405
YFR025C	HIS2	U	-0.41146	0.387851	0.585341	0.0262609	0.0834371	0.131532
YOR202W	HIS3	D	0.222311	-0.934128	-0.387111	-0.0156819	0.200579	-1.48532
YOR202W	HIS3	U	-0.152541	0.754746	-0.376861	0.466882	-0.859397	0.302844
YCL030C	HIS4	D	-0.261566	-0.0667665	0.615901	-0.414759	0.36989	-0.674656
YCL030C	HIS4	U	-0.931181	0.28001	-1.31094	-4.06062	-0.113091	-1.33162
YIL116W	HIS5	D	-0.441837	-0.680118	0.00401152	0.492549	0.195511	-0.640365
YIL020C	HIS6	D	0.795738	1.39541	0.0822496	0.3056	0.403212
YIL020C	HIS6	U	-0.277801	0.736178	-0.352908	0.172199	-0.310366	-1.12805
YBR248C	HIS7	D	0.096635	-0.354896	-0.0977077	-0.617171	-0.168125
YBR248C	HIS7	U	0.433503	-0.107956	-0.0990168		-0.278934	0.0716163
YDR420W	HKR1	D	-0.173172	0.0508661	-1.16939	0.133474	0.522462	0.48241
YDR420W	HKR1	U	0.497606	-0.636092	-0.365723	0.556093	-1.01871	0.103865
YMR161W	HLJ1	D	0.527521	-0.488409	0.131968	-0.0514657	-0.486718	0.331416
YMR161W	HLJ1	U	0.494916	-0.287582	-0.607478	0.0419832	-0.439475	0.480716
YDR528W	HLR1	D	-0.0587041	0.0190067	-1.48543		0.356951	-0.620009
YER057C	HMF1	D	0.204739	0.217511	-1.00734	-0.0330025	1.52268	0.174894
YER057C	HMF1	U	0.702503	1.00807	0.383123	-0.209724	0.880642	-0.400081
YML075C	HMG1	D	0.746547	1.17499	-0.610091	0.162274	1.82373
YML075C	HMG1	U	0.431348	-1.25472	-0.0972281	0.623925	0.282015	0.597159
YLR450W	HMG2	D	0.129474	-0.296216	-0.614653	0.384478	-0.37321	-0.1156
YLR450W	HMG2	U	-1.8926	-1.2858	-1.26793	-1.05758	-0.71344	-1.65398
YOR032C	HMS1	U	-0.0392274	-0.23029	0.586735	-0.1904	0.180331
YOR032C	HMS1	D	-0.366185	-0.59471	0.178966	1.10339	0.434386	0.279274
YJR147W	HMS2	D	-0.287732	-0.553107	-0.597868	-0.323302	-0.205254	-0.116525
YJR147W	HMS2	U	0.402701	-1.35814	0.625948	0.168625	0.271339	-0.347402
YBR034C	HMT1	D	-1.10469	-1.11918	-0.237903	-0.986907	-0.9872	-0.507637
YBR034C	HMT1	U	0.833448	1.02922	0.931547	-0.179675	1.2123	0.542352
YLR205C	HMX1	D	-0.0608516	-0.385163	-0.643816	0.112911	0.1558	-0.121817
YLR205C	HMX1	U	-0.783624	0.710975	-0.728216	0.451951	0.0928523	-0.169931
YGL077C	HNM1	U	-0.313239	2.0062	-0.993559	3.88687	-1.20184
YGL077C	HNM1	D	1.06633	0.0829231	0.268989	-0.130099	-1.04522	-1.13356
YDL125C	HNT1	D	-0.276001	0.528462	0.454709	-0.439438	0.488485	0.0483119
YDR305C	HNT2	D	-0.410296	-0.837692	-0.381828	0.239179	-1.1253	-0.218424
YDR305C	HNT2	U	-1.03914	0.276091	-0.344923	-1.48341	-1.65492	0.652831
YDL227C	HO	D	-0.0100947	-0.0490937	-0.190988	-0.44151	0.176553	-0.285246
YDL227C	HO	D	0.52885	-0.759898	-0.637174	-0.00827175	0.131367	1.01639
YDL227C	HO	U	0.00206012	-0.0667848	-0.0230782	-0.672439	0.451602	-0.903625
YJR075W	HOC1	D	0.837824	0.365275	0.737791	0.176646	-0.514492	-1.28028
YJR075W	HOC1	U	1.56071	0.546205	1.03219	0.320373	-1.54189	0.204292
YNR055C	HOL1	D	0.721869	0.693057	-0.526676	0.471821	0.566075	-0.250472
YNR055C	HOL1	U	0.307125	0.0526968	0.80824	0.233158	0.976913	0.302481
YIL072W	HOP1	D	-0.346228	0.667927	1.03222	-0.443807	0.0225506	-0.0608547
YIL072W	HOP1	U	-1.04113	-0.815105	-0.345732	0.169886	0.029823	0.425111
YGL033W	HOP2	D	0.587045	0.16743	0.256523	0.0437514	0.150436	-0.678679
YER062C	HOR2	D	-0.370738	0.38045	-0.272857	-0.494733	0.451992	0.127354
YER062C	HOR2	U	-1.15987	0.185093	-0.558852	-0.388642	-0.430366	-0.387879
YMR251W-A	HOR7	D	-0.00470395	-0.885629	0.000790768	0.0904445	0.0960225	0.218018
YMR251W-A	HOR7	U	-0.996284	-0.630728	-0.465561	0.451438	-1.07207	0.40742
YPR068C	HOS1	D	0.198536	0.908077	0.265094	-0.157697	-0.686243	-0.818467
YPR068C	HOS1	U	1.2819	0.57755	0.423129	-0.110076	0.116901	-1.24452
YGL194C	HOS2	U	-0.10516	0.224599	0.0379715	-1.16375	0.132776	-1.17702
YPL116W	HOS3	D	-1.05676	-1.00771	-0.580268	-0.188225	0.128928	-0.368008
YPL116W	HOS3	U	-0.0916672	-0.850777	-1.19	0.573262	0.355252	-0.230622
YIL112W	HOS4	U	0.756414		-0.0657016	-0.732004	0.36537
YIL112W	HOS4	D	-0.315553	-0.0989941	0.510502	-0.204759	-0.9893	-0.604265
YMR172W	HOT1	U	0.53669	0.911014	0.648829		0.799717	0.430672
YMR172W	HOT1	D	0.791886	-1.13522	0.0296016	0.714459	0.372018	-0.404792
YMR172W	HOT1	D	-0.781974	-0.235941	-0.147475	0.31221	0.47191	0.0385851
YKL084W	HOT13	D	-0.199395		0.155914	-0.865132	-0.476533	-0.478448
YKL084W	HOT13	U	0.0780915	-0.23147	0.88573		1.2261	0.666323
YPR193C	HPA2	D	0.42785	-1.26135	-0.68324	0.400544	-0.0395997
YPR193C	HPA2	U	0.729608	-0.550558	-0.371387	-0.0779518	0.670496	1.10354
YEL066W	HPA3	D	-0.357783	-0.0729122	-0.144804	-0.102951	0.601542	-0.262791
YEL066W	HPA3	U	-0.0151195	0.378554	-0.372275	0.254127	0.00384032	0.917743
YBR215W	HPC2	D	-0.720887		-1.63069	-3.81101	-0.559599	-1.06211
YBR215W	HPC2	U	-1.60826	-2.73669	-0.902618	-3.97845	-1.92325	-0.374728
YDR399W	HPT1	D	-0.498898	-0.289365	0.118892	0.117425	0.380301	0.460098
YDR399W	HPT1	U	0.356685	1.42832	0.61072	0.415793	0.390843	0.100459
YNL004W	HRB1	D	1.39075	0.68821	0.233131	0.107399	0.985171	0.353574
YNL004W	HRB1	U	1.05157	0.362783	0.357026	0.293132	1.19902	0.580363
YOL013C	HRD1	D	-0.455445	0.0258618	-1.17282		-0.0945514	3.74898
YOL013C	HRD1	U	0.0384051	-0.793193	0.703706	-0.069915	-0.181171	-0.460957
YLR207W	HRD3	D	0.722718	0.440421	0.551442	0.260357	0.364403	-0.000761495
YLR207W	HRD3	U	-0.038406	-0.765158	0.281938	0.621927	-0.0215403	-0.326022
YOR267C	HRK1	D	0.125043	-1.14674	-1.85916	-3.87164	-3.70633	-3.02614
YOR267C	HRK1	U	0.427339	-0.242637	-2.17634	-2.95459	-2.94793	-4.66891
YDR291W	HRQ1	D	0.686318	0.350692	-0.100256	-0.0766294	0.284588	0.970923
YDR291W	HRQ1	U	-0.91733	-0.118728	-0.841489	-0.575359	0.0809129	-0.709224
YLR097C	HRT3	D	-1.11149	-0.326299	-0.215995	0.400239	-0.0540832	0.828547
YLR097C	HRT3	U	-0.379609	0.427149	-0.256809	-0.283264	-0.210668	-0.22081
YMR186W	HSC82	D	-0.422609	-0.526844	-1.04164	0.497407	-0.47946	0.387225
YMR186W	HSC82	U	0.263964	-0.607885	-0.264636	-0.146935	-0.23432	-0.284084
YOR311C	HSD1	D	-1.58916	-0.523186	-0.696117	0.158566	-1.32559	-0.314146
YOR311C	HSD1	U	-0.106925	-0.0038855	-3.33967	2.09192	-0.392081	-0.709078
YHL002W	HSE1	D	-0.0889352	-0.715333	-0.67969	-0.539362	-0.475189	-0.0878448
YHL002W	HSE1	U	0.480871	0.690226	0.0618589	-0.577675	-0.169468	-1.02055
YKL101W	HSL1	U	-1.53887	-3.54001	-1.47333	1.1626	-1.33969	0.592712
YBR272C	HSM3	D	0.960851	0.152858	-0.192235	1.19701	-0.975719	0.382937
YBR272C	HSM3	U	-0.651294	-0.942665	-0.276304	-0.320222	0.0853559	1.99626
YLL026W	HSP104	D	-0.0375415	0.483953	0.196743	-0.563667	0.334023	0.0186767
YLL026W	HSP104	U	-0.768808	-0.224342	-0.218617	0.372993	0.60705	-0.553554
YFL014W	HSP12	U	1.45316	0.33793	0.483662	-0.296988	0.327154
YFL014W	HSP12	U	0.291962	-0.734095	-0.385633	-0.779661	0.489991
YFL014W	HSP12	D	-0.0772403	0.0833622	0.148417	0.79204	0.101059	-0.161507
YJL159W	HSP150	U	0.286258	0.474872	0.907486		-0.549985	0.687282
YJL159W	HSP150	D	-0.0522781	-0.0141361	-0.344562	0.862449	0.710593	-1.01284
YBR072W	HSP26	D	0.0858357	-0.649965	-0.798483	0.0429273	0.180802	0.650255
YBR072W	HSP26	U	-0.377103	-0.78015	-0.371552	-0.502463	0.278302	0.210828
YCR021C	HSP30	D	-0.310816	0.113128	-0.0754525	-0.951167	0.329742	-0.308079
YCR021C	HSP30	U	-0.213022	0.87588	-0.212216	-0.091749	0.391345	-0.326305
YDR171W	HSP42	D	-0.495045	-1.01543	-0.752554	0.768352	-0.891934	0.582587
YDR171W	HSP42	U	0.00410626	0.0261827	-0.137895	0.314577	0.0790731	-0.0552283
YDR258C	HSP78	D	0.161931	-0.4392	-0.137062	-0.00983161	0.239767	0.0322613
YDR258C	HSP78	U	0.12316	-1.68284	0.180938	-0.507026	-0.0192988	0.241053
YPL240C	HSP82	D	0.206263	0.00578647	-0.287955	0.362717	-0.24964	0.202487
YPL240C	HSP82	U	-0.405563	0.178634	-0.432377	0.0766433	-0.0191657	0.620419
YOL068C	HST1	D	0.622312	2.11431	0.444685	0.0473774	1.67729	-0.272436
YOL068C	HST1	U	1.60798	0.630625	0.148467	-0.185526	1.6981	-0.372809
YPL015C	HST2	D	0.0172749	-0.058532	-0.34376	0.341304	0.220272	0.212331
YPL015C	HST2	D	0.268173	-0.514827	-0.571201	-0.350022	-0.392555	-0.177299
YPL015C	HST2	U	0.0623436	0.104332	0.314748	0.193485	0.421293	0.447371
YOR025W	HST3	D	0.783342	0.210914	1.62486	1.15404	0.822657	-0.933112
YOR025W	HST3	U	-0.0947796	1.1903	0.367773	-0.0498898	0.216483	0.206709
YDR191W	HST4	D	-0.488154	0.0182161	-0.580714	0.337878	-0.0301808	-0.208211
YDR191W	HST4	U	-0.419604	0.484162	0.0660169	0.381481	0.353105	-0.301665
YGR223C	HSV2	U	-2.49614	1.43075		-1.74217	0.553356
YBL003C	HTA2	D	-0.0720504	0.458065	-0.342801	-0.622551	0.044185	-0.328356
YBL003C	HTA2	U	-0.266094	-0.309937	-0.437005	-0.222451	0.781583	-0.350187
YBL002W	HTB2	D	0.279756	0.810212	-0.0312294		0.418488	0.240423
YBL002W	HTB2	U	-0.266658	0.317319	-0.146522	-0.436959	0.195528	0.494916
YGR268C	HUA1	U	-0.232615	-2.63201	0.247229		0.449396	0.391503
YGR268C	HUA1	D	-0.319254	0.300474	-0.0322176	-0.400423	-0.52069	0.795448
YOR284W	HUA2	D	0.228873	-0.570821	-0.587157	-0.136208	-0.261167	-0.0853079
YOR284W	HUA2	U	-0.564503	-0.549597	-0.307971	0.183279	0.436554	0.242942
YNR032C-A	HUB1	D	-0.15365	0.494593	-0.145656	-0.949032	0.350513	-0.272504
YNR032C-A	HUB1	U	-0.599991	-0.0867705	-0.293496	0.0827592	0.0473337	-0.462076
YJR036C	HUL4	D	0.53961	-0.104584	0.410426	1.03872	0.267134	0.505279
YJR036C	HUL4	U	-0.641872	0.56878	-0.402325	-0.52213	0.769468	0.157009
YGL141W	HUL5	D	0.872015		-1.34489		0.503691	1.55935
YPL244C	HUT1	D	-0.248755	-0.889414	-0.445341	0.139795	-0.737234	1.11898
YPL244C	HUT1	U	0.449423	-1.78237	-0.558907	0.5352	0.146707	0.0442162
YER039C	HVG1	U	-0.262943	-0.253375	-1.50109		-0.753901	0.212279
YER039C	HVG1	U	-1.5561	-1.09306	-1.3186		0.239368	0.464624
YER039C	HVG1	D	1.21571	0.192581	0.143741	-0.639138	-0.311651	0.363484
YFR053C	HXK1	D	0.25574	-0.200677	0.268308	0.00939342	0.308152	-0.56421
YFR053C	HXK1	U	-0.230133	-0.511578	-0.117957	0.197264	0.633793	0.217607
YGL253W	HXK2	U	-0.536897	-1.48762	0.57907		2.13315	0.659248
YGL253W	HXK2	D	-2.10355	-1.80831	-0.680868	-0.602236	0.651995	0.257467
YHR094C	HXT1	D	-0.199954	0.154888	0.123052	0.334179	0.569892	0.436828
YHR094C	HXT1	U	-0.888206	-0.372942	0.113302	0.0351111	-1.077	1.53891
YFL011W	HXT10	U	0.278698	0.845269	0.939753	0.196616	0.179948	-0.256128
YNL318C	HXT14	D	0.00283834	0.0227595	0.237516	0.337027	0.238238	0.719539
YNL318C	HXT14	U	0.0844798	-0.0710014	-0.596849	0.500641	-0.195315	0.212767
YNR072W	HXT17	D	-0.789488	-0.0640121	-0.317932	-0.0835829	0.419829	0.468996
YMR011W	HXT2	U	1.32943	-0.412494	1.29952	1.01244	1.33439	0.463836
YDR345C	HXT3	D	-0.0768549	-0.792911	0.766962	0.0118823	0.690766	0.199907
YDR345C	HXT3	U	0.53721	-0.900633	-0.0224898	-0.0287228	-0.0182476	1.88668
YHR092C	HXT4	D	0.0496444	-0.790694	0.141518	-0.369127	-0.258732	-0.0458502
YHR092C	HXT4	U	-0.981496	0.0099215	-0.878165	0.00235443	-0.627905	0.531948
YHR096C	HXT5	D	0.301863	-0.20706	-0.0358892	-0.0641984	-0.259218	-0.585557
YHR096C	HXT5	U	-0.339834	-0.65617	-0.538688	-0.302596	-2.40666	0.410776
YJL214W	HXT8	U	0.360561	0.625095	0.794581	0.575712	1.02957	0.458692
YIR037W	HYR1	D	-1.29456	0.00625965	-0.150598	-0.78128	0.366466	-0.961801
YIR037W	HYR1	U	-0.754123	0.00299071	-0.648383	-0.00571054	-1.15511	0.245339
YOR126C	IAH1	D	-0.0450672	-0.777459	-0.377197	-0.220095	-0.0455459	-0.26179
YOR126C	IAH1	U	-0.396159	0.562424	0.13138	-0.147678	0.615745	0.0257729
YER065C	ICL1	D	0.726575	-0.52612	-1.03513	0.73868	0.745081	0.674834
YER065C	ICL1	U	0.446748	0.421437	0.40084	1.24229	-0.158971	0.293196
YPR006C	ICL2	D	-0.0155691	1.00107	0.814321	0.33982	-0.232037	0.0895637
YPR006C	ICL2	U	-0.352624	-0.780863	-0.513565	0.291068	-1.2108	0.0941206
YBR157C	ICS2	D	3.60173	1.05596	2.1498		0.950224
YBR157C	ICS2	D	0.0184311	-0.0329107	0.415296	0.714493	0.81311	0.211584
YBR157C	ICS2	U	0.835622	-0.726416	0.545161	0.0422312	0.369096	0.481281
YJL077C	ICS3	D	-0.644811	-0.719519	0.436771	2.41375	-1.03738	2.37723
YJL077C	ICS3	U	0.373503	0.38762	-0.0208206	-0.737813	0.48333	-0.25482
YLR099C	ICT1	D	-0.984781	-0.0694719	-0.787169	0.312081	0.0633052	-0.156058
YLR099C	ICT1	U	1.14152	0.324898	0.819085	1.59534	1.11935	-0.0683787
YMR195W	ICY1	D	-0.263635	0.00199055	1.23574	0.692718	-0.000509024	0.702489
YMR195W	ICY1	U	0.0252218	-0.283882	0.342843	0.0973968	-0.0379649	0.772778
YPL250C	ICY2	D	-1.43789	0.314454	-0.769789	0.194132	-0.627965	1.3668
YPL250C	ICY2	U	-1.09724	-0.463076	-0.137144	-0.355837	-0.0162853	-0.890077
YDL066W	IDP1	D	-0.198041	0.0771882	1.18618	-2.16767	-4.37677
YLR174W	IDP2	D	-0.250187	0.0210855	-0.51638	0.730189	-0.375329	1.02011
YLR174W	IDP2	U	0.0625634	-0.781585	-0.0791432	-0.761407	-0.310066	-0.99965
YNL009W	IDP3	D	-0.29097	0.330919	-0.383762	0.52056	0.0657095	0.588165
YNL009W	IDP3	U	0.502831	-0.0559174	-0.0067223	-0.0978044	1.18674	-0.278133
YJL146W	IDS2	D	0.0170274	0.533113	-0.107551	0.0964634	-0.28713	-0.234305
YJL146W	IDS2	U	0.936052	1.03904	1.36793	-0.039065	0.362594	-0.0413926
YJL146W	IDS2	U	0.617574	0.999877	0.854947	0.178575	1.30401	0.078099
YFL013C	IES1	D	0.00109754	-1.15833	0.0472402		-0.945843	2.01155
YFL013C	IES1	U	0.880149	1.7649	-1.75112	0.398241	-0.765305
YOR189W	IES4	D	0.952248	2.29179	4.06441	1.51157		-0.167556
YOR189W	IES4	U	0.243906	-1.3817	-0.950379	0.011118	-1.0928	-0.239132
YER092W	IES5	D	-1.71472	-2.71438	-2.58022	-1.89771	-3.65624	-2.95972
YER092W	IES5	U	-0.499993	1.11005	-0.0497507	-2.81417	-1.202	-4.34697
YNL157W	IGO1	D	0.803565	0.148561	-0.145523	0.00854454	-0.393973	-0.00481036
YHR132W-A	IGO2	D	0.148918	0.44308	0.327777	0.319884	0.261169	1.19925
YHR132W-A	IGO2	U	0.517743	0.150008	0.752462	0.0754124	0.0345509	0.487491
YLR384C	IKI3	D	1.05591	2.42234	0.438775
YJL057C	IKS1	D	0.0510232	0.136247	0.158072	0.638042	-0.570186	0.257369
YJL057C	IKS1	U	-0.280711	-0.51383	0.631422	0.356662	-0.864556	0.151925
YCL009C	ILV6	D	0.431922	0.649584	-0.0170909	-1.0289	0.737269	-0.193619
YCL009C	ILV6	U	0.229626	-0.159764	-0.0456471	-0.516303	1.31477	0.0697196
YLR432W	IMD3	D	0.11739	0.516504	1.01291		0.733379	-0.318288
YLR432W	IMD3	D	0.357888	-0.739966	0.635967	0.359334	0.251695	-0.0947113
YLR432W	IMD3	U	-0.426147	-0.337692	-0.531383	-0.390854	0.115531	0.11028
YML056C	IMD4	U			0.710681	1.18484	1.83564
YML056C	IMD4	U	0.993002	1.0379	0.776753	0.426023	1.21353	0.144572
YJR094C	IME1	D	-0.140066	-0.218024	-0.253789	-0.079097	-0.0665982	-0.550282
YJR094C	IME1	U	0.720403	0.517597	0.17414	-0.0806108	0.536993	-0.283609
YJL106W	IME2	D	0.591967	0.910876	0.18521	0.88931	1.16325	1.1992
YJL106W	IME2	D	0.851542	0.60878	0.0846042	0.501437	0.168579	0.280946
YJL106W	IME2	U	0.433525	0.262395	0.655522	0.0641052	0.606033	0.344517
YLR309C	IMH1	D			-0.267591	0.44964	1.05524
YLR309C	IMH1	D	-0.124163	-0.942921	0.204051	0.169564	0.0279364	0.702801
YLR309C	IMH1	U	-0.565549	-3.53275	-0.135038	-0.34474	-0.768477	0.0203756
YJL082W	IML2	D	0.257793	0.644584	-0.163867	-0.173294	-0.769024	-0.985576
YJL082W	IML2	U	0.233123	-0.289193	0.606136	0.170147	-0.0511285	-0.859044
YBR107C	IML3	D	-0.720714	-0.0924681	0.932096		0.546352	0.615757
YBR107C	IML3	U	0.395671	-1.03164	-0.848837	-0.905128	-0.0802793	0.292514
YMR150C	IMP1	U	1.80114		1.0151		-0.243176
YHR046C	INM1	D	-0.0367629	-1.1114	-1.36358	-0.298024	-0.194342	-0.113256
YJL153C	INO1	U	-1.07414		-6.36986		-4.89865
YDR123C	INO2	U	-3.58563	-8.25695	-7.35194	-6.95696	-6.0464	-6.53758
YMR204C	INP1	D	0.539173	0.0704294	0.438754	0.571848	-0.0652372	0.618035
YMR204C	INP1	U	-0.355889	-0.481479	-0.0825112	-0.246935	0.12789	0.446552
YIL002C	INP51	D	-1.28562	-2.10892	-0.891912	-0.210773	0.201964
YIL002C	INP51	U	0.101488	-0.492086	0.438523	0.539472	0.713194	-1.86856
YNL106C	INP52	D	0.412711	-0.238409	-0.319904	-0.507481	-1.11027	-0.0633972
YNL106C	INP52	U	0.647147	0.323151	0.621204	-0.736807	-0.0529161	-0.307121
YOR109W	INP53	D	1.3567	0.502346	-0.0342731	0.350268	-0.181125	-1.04217
YOL065C	INP54	D	-0.294981	-0.393615	-0.214442	-0.125129	-0.594099	0.335706
YOL065C	INP54	U	-0.0782519	-1.18579	-0.0085329	-0.865834	0.274257	-0.680853
YLR095C	IOC2	D	0.622759	0.89728	-0.800058	-0.0413588	0.758572	-0.169186
YLR095C	IOC2	U	0.980268	-0.0941192	0.109329	0.0546314	0.528804	-0.489239
YFR013W	IOC3	D	-0.552858	-0.266139	-0.311897	-0.680616	0.25686	0.621378
YFR013W	IOC3	U	0.13994	0.733001	0.266417	-0.467247	1.01393	-0.0765709
YMR044W	IOC4	U	0.252928	-0.282027	-0.241801	-0.736065	-0.496384	-0.541907
YDR315C	IPK1	D			-0.659599	-0.867514	-1.50724	-0.92104
YDR072C	IPT1	D	-0.982007	-0.193996	0.42219	-0.682197	1.89248
YDR072C	IPT1	U	-0.12684	-3.38758	-2.59646	0.595514	-3.102	0.445873
YDL071C	IRC1	U	0.323339		0.250916	-1.61025	1.03654
YDL071C	IRC1	D	-1.43135	-0.636322	-0.14317	-1.15535	-0.763192	0.910793
YOL015W	IRC10	D	0.532472	0.206412	-0.326014	0.95001	0.0978264	0.79491
YDR112W	IRC2	D	-0.409768	-0.282535	-0.0946164	-0.220591	-0.874835	-0.595193
YDR112W	IRC2	U	-0.603786	-0.131511	-0.564751	0.127569	-0.224456	0.218171
YFR038W	IRC5	D	-0.356791	0.646558	-0.343686	-0.1446	0.108408	-0.64095
YFR038W	IRC5	U	-0.298821	-1.44542	-0.138659	0.609517	-0.496832	0.0745039
YFR043C	IRC6	D	0.0852048	-0.0104879	0.202095	0.472419	0.452368	0.0277233
YFR043C	IRC6	U	0.269385	-5.06629	-2.186	0.590413	-0.0771479	0.492776
YFR055W	IRC7	D	0.312659	0.203858	0.310432	-0.703022	-0.0330479	-0.505553
YFR055W	IRC7	U	0.145215	-0.163273	-0.659563	1.07785	-0.757794	0.674177
YFR055W	IRC7	U	0.139543	-1.45432	-0.809674	1.47452	0.00481964	0.747727
YJL051W	IRC8	D	-0.401115	-0.0477179	0.115799	-0.0403528	0.329114	-1.24511
YJL051W	IRC8	U	-2.2179	-1.2205	-1.76138	-0.400837	-1.70919	-0.461526
YHR079C	IRE1	D	-0.230688	-0.615265	-0.125324	1.89188	0.0303773	2.72785
YHR079C	IRE1	U	-0.173896	-1.38386	-0.623779	-0.012803	-1.06516	0.379955
YKR019C	IRS4	D	-2.00582	0.730759	-1.05249	-1.0712	-0.24597	-1.50627
YKR019C	IRS4	U	-1.94868	-0.568188	-0.276503	-0.639715	0.296131	-1.29788
YER180C	ISC10	D	0.141263	0.640251	0.779316	0.812667	-0.223288	0.661684
YER180C	ISC10	U	0.796913	-0.20622	0.118099	0.292778	1.10658	0.095385
YMR081C	ISF1	D	-2.42573	0.827617	-1.48281	1.16648	-0.743211	0.385354
YMR081C	ISF1	U	-1.18064	-0.116985	-1.08619	-0.516403	0.323191	-0.785911
YOR155C	ISN1	D	-0.583555	0.129457	-0.0260486	-0.373019	0.428087	-1.01259
YOR155C	ISN1	U	-0.283815	-0.618182	0.141496	-0.0552808	0.188651	-0.485707
YNL265C	IST1	D	0.190648	-0.690352	0.316352	-0.163242	-0.212978	-0.179073
YNL265C	IST1	U	0.956524	0.786104	1.12237	0.255848	0.148137	-0.0189655
YPL135W	ISU1	D	0.162431	1.02092	0.047571	-0.141961	0.485471	-0.346784
YPL135W	ISU1	U	0.00397019	0.0556801	0.0693088	-0.247031	0.687767	-0.432705
YOR226C	ISU2	D	-0.422201	-0.661435	0.399276	-0.751955	0.539122	-0.0765467
YOR226C	ISU2	U	-0.548909	-0.362294	-1.14403	0.266013	-0.286196	0.690055
YBR245C	ISW1	D	0.34709	-0.94988	-0.354622		0.526651	-0.616252
YBR245C	ISW1	U	-0.0614466	-0.543213	-0.714026	-0.537515	0.205262	-0.490481
YOR304W	ISW2	D	0.329456	-0.192629	0.291033	-0.601638	-0.343911	-0.927185
YOR304W	ISW2	U	0.0356805	-0.202581	-0.044588	-0.554129	0.252836	-0.555405
YJR050W	ISY1	D	1.26266	0.833591	-1.16447	-0.218375	0.240562
YJR050W	ISY1	U	0.0505388	-1.36273	0.777099		0.401603	0.492648
YGL133W	ITC1	U	0.693748		0.505577	0.154598	1.03821
YGL133W	ITC1	D	0.211181	0.697704	0.259897	-0.638598	-0.212967	-1.54515
YDR497C	ITR1	D	-0.279406	0.442119	-0.386335	-0.489173	-0.550992	-1.2086
YDR497C	ITR1	U	-0.171588	0.0197544	-1.12894	-0.970927	0.389069	-0.70922
YOL103W	ITR2	D	0.522397	0.465464	-0.256961	-0.150552	0.746087	0.0353515
YOL103W	ITR2	U	-0.546149	-0.197752	-0.329267	0.481625	-0.0654274	0.299863
YML068W	ITT1	U	0.426669	0.800783	0.166054		0.635359	-0.159844
YML068W	ITT1	D	-0.432074	0.415676	-0.903013	-0.531856	0.0596969	0.57965
YML068W	ITT1	U	0.38865	0.709519	-0.446493	0.506946	0.416005	0.557424
YDR229W	IVY1	D	-1.14752	-1.10561	-0.161945	-0.46364	-0.0625881	0.24072
YDR229W	IVY1	U	-0.0215544	0.173752	-0.0624037	-0.134885	0.137821	-0.725503
YDR492W	IZH1	D	-2.6352	-0.764545	-2.26724	0.856951	-2.00508	-0.100139
YDR492W	IZH1	U	1.04709	0.635314	1.08967	0.613993	1.19835	0.108955
YOL002C	IZH2	D	-1.44702	-1.16735	-2.30265	-1.60737	-1.16919	-1.09233
YOL002C	IZH2	U	-0.895999	-2.06804	-1.66268	-2.27598	-2.13955	-1.19744
YLR023C	IZH3	D	1.24253		1.20658		-0.871111
YLR023C	IZH3	U	-0.507122	-0.159322	-0.391354	0.207065	-0.733304	-0.542771
YOL101C	IZH4	U	0.441649	0.312544	-0.0373666	0.315586	0.751173	0.515386
YJL073W	JEM1	D	0.54852	0.360928	0.290681	0.42875	0.0901209	-0.534822
YJL073W	JEM1	U	0.906976	0.308877	0.132364	0.256245	-0.216243	-0.398947
YKL217W	JEN1	D	0.32132	0.244259	0.222543	-0.216141	0.333357	-0.548562
YKL217W	JEN1	U	-0.847625	-1.75777	-1.03738	0.478441	-0.421253	0.262654
YER051W	JHD1	D	0.180927	0.487563	1.09147	0.24906	0.148608	-0.789
YPR061C	JID1	D	1.32568	1.16519	-0.110118	1.24123	1.09362	-0.283093
YPR061C	JID1	U	0.578879	0.463852	-0.981258	-0.17911	0.760123	0.133604
YLR331C	JIP3	D	2.19922	1.46602	1.38812	1.70559	0.788755	0.0241641
YLR331C	JIP3	U	-0.112215	0.241694	-0.639286	1.01834	-0.499777	1.37783
YJL162C	JJJ2	D	0.574427	0.11128	0.869922	0.413729	-0.330723	0.57492
YJL162C	JJJ2	U	0.177862	1.0463	0.888228	-0.151034	0.35943	0.331468
YJR097W	JJJ3	D	-0.167484	1.98797	-0.982863	-0.276773	-0.84087	0.32605
YJR097W	JJJ3	U	0.301906	1.028	-0.467578	0.8029	0.734951	0.104541
YJR097W	JJJ3	U	-0.161759	1.22283	0.158652	-0.328343	0.198051	0.155895
YLL057C	JLP1	U	0.316744	0.108941	0.114928	0.0140265	0.359945	0.405276
YMR132C	JLP2	D	0.243334	-1.1087	-0.5159	1.00381	0.0506543	0.953414
YMR132C	JLP2	U	-0.124798	0.182113	0.251535	0.193201	0.876614	0.353035
YMR294W	JNM1	U	-1.51962	-0.770821	-3.39766		-1.63917
YJR091C	JSN1	D	0.755743	-1.50429	0.0822671		-0.0784341	-0.892157
YJR091C	JSN1	D	0.326859	-1.33144	-0.464405	0.705044	0.293535	-1.36058
YJR091C	JSN1	U	-0.92673	-0.702615	-1.57009	0.142556	-0.976184	-0.0486987
YGL241W	KAP114	D	-0.602144	-0.885098	-0.455331	-0.342544	-0.978257	1.19778
YGL241W	KAP114	U	-0.273659	-0.239407	0.678765	-0.255097	0.963115	-0.150571
YGL241W	KAP114	U	-0.206724	0.444032	0.67018	-0.327684	0.618707	-0.313876
YGL016W	KAP122	D	-0.800164	0.604431	-2.16455		-0.336916	-0.884527
YCL055W	KAR4	D	-0.25286	-0.83382	0.425533	-0.283755	0.0829439	-0.0252654
YMR065W	KAR5	D	0.426903	-0.159179	-0.0384021	-0.326476	-0.615652	0.942693
YMR065W	KAR5	U	-0.0251401	0.778915	-0.414024	0.420223	0.174621	0.354058
YPL269W	KAR9	D	0.620577	-0.64141	-0.932066	2.51588	-0.546543	0.9921
YPL269W	KAR9	U	0.147034	0.44832	-0.160277	-0.00543364	-0.556407	-0.72273
YCL024W	KCC4	D	0.74482	-0.415098	-0.414883	-0.026005	0.498568	0.146181
YCL024W	KCC4	U	0.109605	-1.00185	1.45616	-0.815867	-0.822678	-0.197616
YHR158C	KEL1	D	-0.306418	-0.0696513	-0.471727	-0.154077	-0.246032	1.15264
YHR158C	KEL1	U	0.456831	-1.03395	0.704848	0.612994	-0.561703	0.0769037
YGR238C	KEL2	D	0.909261	-0.731554	1.31458	0.072838	-0.185974	0.812687
YGR238C	KEL2	U	-0.312008	0.388743	-1.01171	-0.200658	-0.623998	0.3624
YPL263C	KEL3	D	-0.907152	-0.773028	-0.724929	-0.475739	-0.272742	0.336196
YPL263C	KEL3	U	-0.152257	0.220636	-0.921906	-0.125926	0.105594	0.328303
YPL145C	KES1	D	0.181423	-1.01201	-0.886177	-0.161519	0.236886	-0.325287
YPL145C	KES1	U	-0.86745	-0.047316	-0.185863	-0.599366	-0.145037	0.29526
YGL203C	KEX1	U	-4.7451			-2.67192	-0.3357
YGL203C	KEX1	D	-1.19704	-0.336121	-0.997889	-0.876957	-0.505275	0.109865
YIL125W	KGD1	D	-1.71308	-0.663703	-2.09309		0.0585282	0.248404
YIL125W	KGD1	U	-1.07823	0.191778	-1.83094	0.893183	-2.82392	-0.17929
YDR148C	KGD2	U	0.660465	-2.23958	1.11405	0.245756	-2.16039	-1.82199
YJL094C	KHA1	D	0.588201	0.0306916	0.0497398	-0.097105	-1.06512	-0.25672
YJL094C	KHA1	U	0.219028	-0.263107	-0.661978	0.826512	-1.07279	-0.806307
YDR122W	KIN1	D	-1.5825	-0.184405	-0.504448	-0.234039	0.251061	2.18278
YDR122W	KIN1	U	-0.150865	0.301421	0.289298	-0.430076	0.207126	0.279391
YLR096W	KIN2	D	-0.914739	0.472375	-0.856193	0.341189	-0.0135305	0.372031
YLR096W	KIN2	U	0.305593	0.530432	0.2798	0.00683071	0.493594	-0.467268
YAR018C	KIN3	U	-0.946853	-0.781319	0.204768	0.0687429	0.17341
YOR233W	KIN4	D	-0.0567705	0.935187	-0.0435663	0.0860323	-0.484037	0.156096
YOR233W	KIN4	U	-0.780168	-0.77366	-0.297717	0.303463	-0.328036	0.644291
YCR091W	KIN82	U	0.436099	0.865522	-1.4461	0.374779	-0.3624	0.06636
YBL063W	KIP1	D	-0.405555	0.0967479	-0.688083	-0.33168	-0.220534	0.501327
YBL063W	KIP1	U	-1.71103	-0.99181	-1.72646	-0.120712	-0.921967	0.0897474
YPL155C	KIP2	D	0.199169	0.302509	1.10786	0.409735	-0.427736	-1.05544
YPL155C	KIP2	U	0.822751	0.744439	1.01893	0.468719	0.522358	-0.0439616
YGL216W	KIP3	U	0.548847	0.322434	0.922957	-0.20345	1.02096	7.98937e-05
YKL168C	KKQ8	U	-0.041971	-0.873742	-1.00233	0.491591	0.50885	-0.666565
YDL049C	KNH1	D	0.240092	0.617655	-1.00649	-0.766368	0.12182	-0.281875
YDL049C	KNH1	U	0.0323823	0.00930533	-0.957311	-0.0181239	-0.239451	-0.54095
YLL019C	KNS1	D	-0.032403	1.52247	0.242313	-0.456494	0.92677	-0.991871
YLL019C	KNS1	U	-1.66377	0.256466	0.330033	-0.510346	-0.376712	-2.34688
YNL322C	KRE1	U	-0.258576	0.467236	-0.490133		0.655241	0.300859
YNL322C	KRE1	D	1.00694	-0.470691	0.709648	1.52513	1.36259	-0.442896
YGR166W	KRE11	U	-0.444865		0.0676061		0.473525
YGR166W	KRE11	D	0.0633922	0.253429	-1.19005	0.18354	-0.914652	-0.229777
YDR483W	KRE2	U	-1.80628	-1.95176	-2.22868	0.358037	-0.675548	-0.112558
YIL027C	KRE27	D	0.0374842	-1.23181	0.23253	0.0747584	0.145434	-1.18234
YHR082C	KSP1	D	-0.311	-2.86275	1.02974	-0.898359	-1.88434	1.59768
YHR082C	KSP1	U	0.554508	-2.21148	-0.27612	-0.13991	-2.3056	1.91535
YGR040W	KSS1	U			-0.252364	0.904532	0.721017
YGR040W	KSS1	D	-0.54949	-0.497478	-0.888941	0.155274	-0.333585	-0.244986
YGR040W	KSS1	U	-0.284747	0.451106	-0.332127	0.20219	-0.00404404	0.0304782
YOR099W	KTR1	D	0.590259		-0.737824	0.254868	-0.697035	1.47979
YOR099W	KTR1	U	-0.135365	-0.539364	0.246095	-0.0377698	-0.570075	0.244559
YKR061W	KTR2	D	0.381339	0.21081	-0.221781	-0.00672905	-0.628405	-0.201345
YKR061W	KTR2	U	0.265539	-0.961529	0.747833	0.425335	-0.384867	0.467017
YBR205W	KTR3	U	-0.25714	-0.126975	0.427198		-0.360009	0.289681
YBR205W	KTR3	D	0.435116	-0.473287	0.713923	-1.28441	-0.130741	0.355544
YBR199W	KTR4	D	-0.174499	0.692909	0.160807		-0.538397	-0.167986
YBR199W	KTR4	U	-0.158215	-0.527456	-0.505858	0.476392	-0.688602	-0.176787
YPL053C	KTR6	D	0.380568	-1.68063	-0.0288108	0.301967	0.329536	-0.562269
YPL053C	KTR6	U	-0.95961	-0.0381388	-0.431261	0.744427	-0.459587	0.837357
YIL085C	KTR7	D	0.796495	0.0834213	0.66116	-0.00951634	0.444768	-0.586128
YIL085C	KTR7	U	-0.555935	0.329558	0.0625627	0.155897	0.292179	0.0163836
YJL207C	LAA1	D	-0.695573	-0.784178	-0.270612	0.85534	0.0712107	1.08707
YJL207C	LAA1	U	-0.367597	0.249401	0.111767	0.572225	0.588614	-0.141026
YKL008C	LAC1	D	-0.186994	0.733056	-0.550548	0.0327514	-0.184475	0.520537
[truncated: 5,053 more rows]

## Sheet: ORF sort
Gene	Name	ID	Tag	2vs1	4vs1	6vs1	8vs1	10vs1	14vs1
YAL002W	VPS8	VPS8	U	-0.841049	-7.68985	-0.141234	1.2592	-1.01357	0.640347
YAL004W	0	YAL004W	U	-0.294741	-1.02284	0.0499397	0.16593	-0.0762129	-0.115223
YAL005C	SSA1	SSA1	U	-1.22397	-0.898407	-0.490983	-0.0385266	0.104799	-0.121057
YAL007C	ERP2	ERP2	U	-0.461506	0.450762	-0.414188	-0.0362437	0.228332	0.136455
YAL008W	FUN14	FUN14	U	0.747904	-0.190254	-0.25054	-0.0572642	-0.107475	-0.658144
YAL014C	SYN8	SYN8	U	1.6591	1.78673	0.498126	0.0241126	0.203333	0.0279579
YAL015C	NTG1	NTG1	U	3.00796e-05	0.483104	0.537983	-0.0297932	0.382478	-0.920459
YAL016W	TPD3	TPD3	D	-4.72679	-2.81699	-4.56304		-3.1025
YAL016W	TPD3	TPD3	U	0.636754	0.53857	0.615729		0.765715
YAL017W	PSK1	PSK1	U	0.144222	-1.16048	-0.146196	-0.34538	0.00771542	-0.172148
YAL018C	0	YAL018C	U	-0.14328	0.397928	0.277833	0.615257	0.698132	-0.537359
YAL019W	FUN30	FUN30	U	0.0194541	0.256861	0.679707		0.475591	-0.427545
YAL022C	FUN26	FUN26	U	0.562099	0.297607	1.02464	0.290386	0.437676	0.0837827
YAL027W	0	YAL027W	U	0.503911	1.02243	0.156196	-0.77409	0.927379	0.201092
YAL028W	FRT2	FRT2	U	0.729603	0.240347	0.899293	-0.682186	0.765118	0.880437
YAL029C	MYO4	MYO4	U	0.715005	-0.217653	0.937966	1.03304	0.401494	-0.102205
YAL030W	SNC1	SNC1	U	0.613392	-0.261084	0.971892	0.66472	1.27352	0.482817
YAL031C	GIP4	GIP4	U	0.234097	-0.467806	0.913587	0.924918	-0.180715	0.738036
YAL034C	FUN19	FUN19	U	-0.030951	-0.00610176	-0.691256	-0.0249719	-0.295078	0.202116
YAL036C	RBG1	RBG1	U	0.0809363	0.668498	0.228113		0.680372	-0.310618
YAL037W	0	YAL037W	U	-0.293849	1.01353	0.0554077	0.00697621	1.26914	0.0531788
YAL040C	CLN3	CLN3	U	-0.812912	1.01859	1.01618	3.5358	-1.17373
YAL042W	ERV46	ERV46	U	-0.557489	-3.02532	-0.183355	-2.02498	-0.747477
YAL043C-A	0	YAL043C-A	U	-0.945979	-0.821319	-0.0924094		-0.252455	-2.05804
YAL045C	0	YAL045C	U	0.264326		-1.19895	0.527638	-2.09495	-0.723452
YAL045C	0	YAL045C	U	-0.132898	-0.564631	-0.286881	0.199681	-1.12474	0.0166813
YAL046C	0	YAL046C	U	-1.18798	-0.430665	-0.773307	-0.22719	-0.256679	2.07633
YAL047C	SPC72	SPC72	D	-4.18259	-0.632307	-2.28316		-2.09858
YAL047C	SPC72	SPC72	U	0.562162	-0.00747607	-0.0982092		0.30601
YAL048C	GEM1	GEM1	U	0.170034	0.817094	0.831308	1.48244	0.50833	-0.0588991
YAL049C	0	YAL049C	U	-0.375893	-0.566908	0.344409	0.0652351	0.515403	0.407857
YAL051W	OAF1	OAF1	U	-0.167976	0.298473	0.00468315	0.185748	0.335748	-1.50581
YAL053W	FLC2	FLC2	U	-0.395657	-0.176226	0.956785	-0.238097	-0.0479765	-0.135651
YAL054C	ACS1	ACS1	D	-0.286286	-0.633342	-0.364755	0.101857	-0.269369	-0.0232405
YAL054C	ACS1	ACS1	U	0.127548	-0.192541	-0.322468	-0.0541124	0.251946	0.00438231
YAL055W	PEX22	PEX22	U	1.41617	-2.79633	0.868468	1.33645	1.37668
YAL056W	GPB2	GPB2	U	0.861438	-0.780424	0.259518	0.875965	-1.13177	0.944849
YAL058C-A	0	YAL058C-A	D	-0.773333	-0.491244	-1.94809	-0.957174	-1.42959	-0.571788
YAL058C-A	0	YAL058C-A	U	2.25752	1.5435	2.3012	-0.589834	2.05159	-0.146378
YAL058W	CNE1	CNE1	U	-1.09323	-1.32306	-2.5576	0.33686		-0.0768229
YAL059W	ECM1	ECM1	U	-1.11445	0.172288	-0.689395	0.61816	-0.742999	-0.803808
YAL060W	BDH1	BDH1	U	-0.28404	-0.334557	-0.0998733	0.234214	-0.063628	-0.377458
YAL061W	0	YAL061W	U	0.0124132	-0.943708	-0.342124	0.843519	-0.264641	-0.122951
YAL062W	GDH3	GDH3	U	0.423753	0.67597	-0.790099	-0.991294	0.94966	-0.474785
YAL064C-A	0	YAL064C-A	D	0.281795	-0.345185	-0.0827894	0.560503	-0.719905	-0.161723
YAL064C-A	0	YAL064C-A	U	0.381517	-0.0807257	-0.0325319	-0.179795	0.267677	-0.507876
YAL065C	0	YAL065C	U	-0.372311	0.0419395	-0.718265	0.968128	0.0444688	0.199485
YAL066W	0	YAL066W	U	-0.962072	0.146178	-1.42614		0.475829	0.701326
YAL067C	SEO1	SEO1	U	-0.144819	0.350635	-0.699274	0.0787315	-0.370657	-0.624881
YAL068C	PAU8	PAU8	U	-0.921274	0.0189811	-0.627933	0.769192	-0.513353	-0.189504
YAR002C-A	ERP1	ERP1	D	0.642774	0.157297	-0.457375	-0.507833	0.480441	-0.0715038
YAR002C-A	ERP1	ERP1	U	-0.450104	0.851557	1.19087	-0.521019	0.228727	-0.197042
YAR002W	NUP60	NUP60	U	-10.2219	-4.13662	-0.929681		-7.48005
YAR014C	BUD14	BUD14	U	1.99503	-1.51183	1.92869	-1.61447	2.21653	3.5606
YAR015W	ADE1	ADE1	U	3.13769		4.71047	0.0338627
YAR018C	KIN3	KIN3	U	-0.946853	-0.781319	0.204768	0.0687429	0.17341
YAR020C	PAU7	PAU7	U	0.0773118	0.13373	0.199157		1.06227	0.0644686
YAR023C	0	YAR023C	U	0.255436	-0.267277	-0.210206	1.18906	-0.677422	0.169718
YAR027W	UIP3	UIP3	U	0.391386	0.944049	0.0743161	0.530037	0.353413	0.67359
YAR028W	0	YAR028W	U	0.374455	-0.230792	-0.194816	0.652044	0.283057	-0.119269
YAR029W	0	YAR029W	U	0.315622	-1.14664	-0.319748	0.139422	0.253615	-0.0697114
YAR030C	0	YAR030C	U	0.31427	-0.483739	0.49354	1.25582	0.492577	-0.299059
YAR031W	PRM9	PRM9	U	0.854528	0.40775	0.942751	0.568413	0.881075	-0.22982
YAR035W	YAT1	YAT1	U	-0.56199	-0.609778	-0.303124	0.710189	-0.28988	-0.201979
YAR037W	0	YAR037W	U	-0.132737	-0.208924	-0.274376	0.323065	-0.327465	0.0152816
YAR040C	0	YAR040C	U	-0.236218	0.484158	0.0327567	-0.293339	-0.172243	-0.865768
YAR042W	SWH1	SWH1	U	-0.203419	-0.474712	-0.36436	-0.421837	-0.0100411	-0.249664
YAR043C	0	YAR043C	U	0.900979	0.295828	-0.340514	0.661372	-0.783939	2.05013
YAR044W	0	YAR044W	U	-0.392376	-0.68048	0.31108	1.05373	-1.24098	-0.347468
YAR047C	0	YAR047C	U	-0.39578	-0.381673	-0.0834955	-0.327303	-0.191325	-0.509935
YAR050W	FLO1	FLO1	D	-1.03798	-0.686542	-1.36512	0.886033	-0.812283	1.50539
YAR050W	FLO1	FLO1	U	0.240619	0.365032	0.815339	0.574181	0.603945	-0.575292
YBL001C	ECM15	ECM15	D	0.216862	0.324647	0.423657	-0.231767	-0.930609	0.427243
YBL001C	ECM15	ECM15	U	-1.04583	-0.9735	-0.291755	-0.499696	-0.113542	-0.107906
YBL002W	HTB2	HTB2	D	0.279756	0.810212	-0.0312294		0.418488	0.240423
YBL002W	HTB2	HTB2	U	-0.266658	0.317319	-0.146522	-0.436959	0.195528	0.494916
YBL003C	HTA2	HTA2	D	-0.0720504	0.458065	-0.342801	-0.622551	0.044185	-0.328356
YBL003C	HTA2	HTA2	U	-0.266094	-0.309937	-0.437005	-0.222451	0.781583	-0.350187
YBL005W	PDR3	PDR3	D	-0.306758	1.06611	-1.05477	-0.554695	0.867171	-0.569536
YBL005W	PDR3	PDR3	U	-0.0112512	-0.570228	-1.14602	1.03773	0.0502645	-0.0151221
YBL008W	HIR1	HIR1	D	-0.244036	2.89833	-1.89401		2.71995
YBL009W	0	YBL009W	D	0.677182	0.263562	-0.189838	-0.235949	0.209514	0.245011
YBL009W	0	YBL009W	U	0.276089	-0.108138	-0.0627349	0.494789	0.0964591	0.754824
YBL010C	0	YBL010C	D	0.3064	-0.333842	0.298579	-0.517483	0.446203	1.0755
YBL010C	0	YBL010C	U	-0.242697	0.38812	-0.409698	-0.392977	-0.259055	0.251333
YBL011W	SCT1	SCT1	D	1.39012	-0.298245	-0.169742	0.587131	0.0993892	0.0828487
YBL011W	SCT1	SCT1	U	0.337447	-0.509421	-1.35507	1.13982	0.190717	0.386697
YBL012C	0	YBL012C	D	1.39932	1.69727	-0.338968	-0.100547	0.839058	0.779842
YBL012C	0	YBL012C	U	0.496715	-2.69088	-1.66052	0.815005	-0.438426	0.591574
YBL013W	FMT1	FMT1	U	-1.01221	-2.60758	-1.15592	-2.20634	-2.91016	-1.20216
YBL015W	ACH1	ACH1	D	0.349697	0.769781	0.328349	-0.439015	-0.157378	-0.255709
YBL015W	ACH1	ACH1	U	-0.743477	-0.66745	-0.546818	-0.903153	-0.764315	-0.434478
YBL017C	PEP1	PEP1	U	-0.376433		-0.670009	-2.44214	-0.621365	-2.21741
YBL017C	PEP1	PEP1	D	-0.798418	-0.430826	-1.29048	-1.11146	0.755925	0.165933
YBL019W	APN2	APN2	U	-0.992372	-1.21742	-0.359462		-1.1155	0.329361
YBL019W	APN2	APN2	D	-0.220578	0.367933	2.46287	-1.26028	0.40313	0.318124
YBL022C	PIM1	PIM1	U	-0.907107		-0.891551	-1.45325		-2.54285
YBL022C	PIM1	PIM1	D	1.46557	1.68131	1.63894	-0.926971	0.459123	-0.70356
YBL024W	NCL1	NCL1	D	0.701803		-1.00566	-2.31982	-1.75911	0.121857
YBL024W	NCL1	NCL1	U	-0.137516	0.446612	-0.297968	-1.68716	-0.675957	-0.922238
YBL027W	RPL19B	RPL19B	U		4.55485	0.00538805	0.756646		0.678769
YBL028C	0	YBL028C	D	0.791022	2.40357	-0.657225	-1.77139	0.197394	0.270995
YBL028C	0	YBL028C	U	-0.593224	0.0495636	0.189597	-0.0780583	-1.59069	0.936128
YBL029W	0	YBL029W	D	-0.0171708	0.820047	0.493904		0.0336676
YBL029W	0	YBL029W	U	-0.908759	-0.462835	-0.998869	0.462837	-0.278089	0.673784
YBL031W	SHE1	SHE1	U	0.348758	-1.62508	-0.0977085		-2.05761	1.61391
YBL031W	SHE1	SHE1	D	0.554261	0.213589	-0.429083	-0.730891	1.10797	-0.0760155
YBL032W	HEK2	HEK2	U	0.18359	0.296117	-0.24025	0.0510322	-0.877995
YBL032W	HEK2	HEK2	D	0.0501803	-0.341575	0.477166	0.307515	-0.463341	0.272331
YBL036C	0	YBL036C	D	0.263847	-0.282406	-1.12439	-0.772652	-0.276278	-0.126759
YBL036C	0	YBL036C	U	-0.924446	-1.50907	-0.758552	0.125797	-0.748708	0.0233487
YBL037W	APL3	APL3	D	-0.931127	0.330467	-0.265473		0.460543	1.02684
YBL037W	APL3	APL3	U	-1.21605	0.774064	-0.428276	-0.884221	0.178444	0.624992
YBL043W	ECM13	ECM13	U	-0.882936	0.491298	0.470665		-0.549846	0.351567
YBL043W	ECM13	ECM13	D	0.699868	0.295004	0.140692	-0.135579	0.109831	-1.04711
YBL044W	0	YBL044W	U	0.554755	0.271251	0.863799		0.370077	0.614165
YBL044W	0	YBL044W	D	-0.305072	1.27455	0.184398	0.0271145	0.132898	0.288239
YBL045C	COR1	COR1	D	3.56909	2.68952	0.851002		-1.10716
YBL045C	COR1	COR1	U	1.54006	1.00996	-1.86326	-1.85713		0.950695
YBL046W	PSY4	PSY4	D	0.652349	0.754382	-1.06122	-1.39142	-1.78634	-0.652922
YBL046W	PSY4	PSY4	U	-0.0208049	0.496097	-2.58786	-0.730581	-0.906309	-0.408354
YBL047C	EDE1	EDE1	D	-0.517916			-4.36256		-1.17785									8	3	42	48	45	50	32	45	22
YBL047C	EDE1	EDE1	U	-0.767074	0.486881	-1.3504	-1.56979	-0.316419	-2.8729
YBL048W	0	YBL048W	D	-0.864764	-1.27092	-0.712106	-0.365991	-0.699842	0.0119492
YBL048W	0	YBL048W	U	-1.064	-0.655786	-0.870214	-2.12845	-0.848994	-0.834268
YBL049W	MOH1	MOH1	D	-0.376036	0.183025	0.413289	-1.68019	-0.322336	-1.0104
YBL049W	MOH1	MOH1	U	-0.39426	-0.170567	-1.03616	-1.86576	-0.725736	-0.648669
YBL051C	PIN4	PIN4	U	-0.67109	2.12304	-0.580207	0.134014	2.07362
YBL052C	SAS3	SAS3	U	-0.698482	0.435689	-0.255097		-0.674606	0.128265
YBL052C	SAS3	SAS3	D	-0.260571	-0.583979	0.41253	-3.12336	0.917014	0.476198
YBL053W	0	YBL053W	D	-0.557895	0.557795	-0.438892	-0.230552	0.0847405	0.444354
YBL053W	0	YBL053W	U	-0.488645	-0.647377	-0.312816	-0.294234	0.0608359	0.479703
YBL054W	0	YBL054W	U	-0.456327	0.307183	-0.492354	-0.550265	-0.6753	-0.135921
YBL055C	0	YBL055C	D	-1.26754	-0.378565	-0.543106	-2.8422	0.693057	0.456648
YBL055C	0	YBL055C	U	-1.53632	-0.0962493	0.213862	-0.332505	0.0581554	0.00876583
YBL056W	PTC3	PTC3	D	0.808646	-0.59205	-0.450529	-1.90319	0.374328	-0.119985
YBL056W	PTC3	PTC3	U	-0.892502	-0.765498	-0.663356	0.0727566	-0.782141	0.33795
YBL057C	PTH2	PTH2	D	-0.213548	-1.47357	-0.139854	-1.55037	0.456565	-0.185781
YBL057C	PTH2	PTH2	U	-0.897795	0.949786	-0.619399	-0.129668	-0.719009	-0.278671
YBL059W	0	YBL059W	D	-1.09971	-0.159353	-1.18814	-1.88849	-1.01661	2.3434
YBL059W	0	YBL059W	U	-0.640567	-1.25799	-0.640391	-0.593968	-0.678665	-0.14595
YBL060W	0	YBL060W	D	0.29472	1.15612	-1.59429	-0.313887	0.31702	-0.296309
YBL060W	0	YBL060W	U	-0.616312	-0.979994	-0.342845	-0.778446	-0.019943	0.404722
YBL061C	SKT5	SKT5	D	1.63243	0.244733	-0.320648	-2.19884	-0.206622	-0.146484
YBL061C	SKT5	SKT5	U	-1.16982	-0.670719	-1.17389	-0.879818	-1.71854	-0.40182
YBL062W	0	YBL062W	D			-1.07423	-2.35561	-0.994176	1.22199
YBL062W	0	YBL062W	U	-0.957895	-1.61164	-0.934373	-0.641696	-0.592435	0.796761
YBL063W	KIP1	KIP1	D	-0.405555	0.0967479	-0.688083	-0.33168	-0.220534	0.501327
YBL063W	KIP1	KIP1	U	-1.71103	-0.99181	-1.72646	-0.120712	-0.921967	0.0897474
YBL064C	PRX1	PRX1	D	-0.986715	-0.83748	-0.00537884	-0.468826	0.317416	0.704295
YBL064C	PRX1	PRX1	U	-1.00132	0.651157	0.170563	0.415203	-1.18674	0.346552
YBL065W	0	YBL065W	D	-0.966162	-1.11413	-0.810491	-0.571387	-1.12411	1.3783
YBL066C	SEF1	SEF1	D	-0.54856	-1.22808	-0.292805	-0.829576	0.221517	0.75383
YBL066C	SEF1	SEF1	U	-0.285879	0.418272	-0.00596813	-0.630174	-0.109838	0.22728
YBL067C	UBP13	UBP13	D	-0.577555	0.946429	-0.0295252	-4.65109	1.96548
YBL067C	UBP13	UBP13	U	-1.39488	1.96351	-1.59358	-2.65304	-2.17619	1.52442
YBL068W	PRS4	PRS4	D	-1.16461	-0.61885	-0.499801	-0.921784	0.16337	0.69796
YBL068W	PRS4	PRS4	U	-0.271381	-0.0385355	0.0543783	0.372829	0.497579	0.880589
YBL069W	AST1	AST1	D	0.437535	-1.27191	-0.683449	-0.868569	0.297571	0.399677
YBL069W	AST1	AST1	U	-0.728069	-1.26203	-0.915916	-0.186271	-0.332624	0.262853
YBL070C	0	YBL070C	D	-1.15158	-0.30946	-0.0423989	-1.19874	0.174223	0.869198
YBL070C	0	YBL070C	U	-0.401921	-0.000631113	-0.0196708	-0.0360722	-0.621137	-0.219971
YBL075C	SSA3	SSA3	D	-0.0371578		-0.0868536	-1.83975	-0.686616	-0.733339
YBL075C	SSA3	SSA3	U	-0.945364	-1.03163	-1.05873	-0.870931	-0.735238	0.39694
YBL078C	ATG8	ATG8	D	-1.00574	-1.64352	-2.66424	-3.61145	-3.99769	-3.75469
YBL078C	ATG8	ATG8	U	-0.999753	-0.8143	-2.78921	-5.36842	-3.463	-5.47584
YBL080C	PET112	PET112	U	-0.197392	1.35509		-4.09517	0.733997	0.319479
YBL081W	0	YBL081W	D	-0.495156	-0.233209	1.209	1.63213	0.536777	2.15703
YBL081W	0	YBL081W	U	-1.3813	-1.40635	-0.0777237	-1.50718	0.0133158	-0.832052
YBL082C	ALG3	ALG3	D	0.373525	-0.257096	-1.49923	2.14347	-0.327355
YBL082C	ALG3	ALG3	U	1.04526	0.627252	-0.078428		-0.643508	0.109282
YBL083C	0	YBL083C	D	1.44255	-0.213424	-1.77119	-2.10416	-1.1649	-0.715106
YBL083C	0	YBL083C	U	0.380638	-0.264723	-0.166411	-0.459214	-1.61947	-0.615369
YBL085W	BOI1	BOI1	D	0.330877	1.07068	0.592665	-1.44625	0.455534	0.410093
YBL085W	BOI1	BOI1	U	-0.32795	0.529957	0.360989	0.102851	0.144439	0.2016
YBL086C	0	YBL086C	D	-0.270885	-0.616538	-0.698643	0.0137241	0.17617	0.869361
YBL086C	0	YBL086C	U	-0.87141	-0.650525	-0.640304	-1.07768	-0.471185	0.566947
YBL087C	RPL23A	RPL23A	U		2.68277	-0.779277	-2.64419	-2.10547	-1.0504
YBL088C	TEL1	TEL1	D	0.0189199	-1.09011	0.00090343	-0.918963	0.226021	1.27689
YBL088C	TEL1	TEL1	U	-1.07404	-0.0115856	-0.796651	-0.856537	-0.185828	0.44779
YBL089W	AVT5	AVT5	D	-1.43162			-2.10276		1.33698									32	5	6	13	5	11	7	7	3
YBL089W	AVT5	AVT5	U	-1.67355	-0.307241	-0.630776	-1.27701	-0.277249	0.149191
YBL091C	MAP2	MAP2	D	0.0608077	-1.22898	-0.665921	-2.24019	0.125097	0.251768
YBL091C	MAP2	MAP2	U	-0.7376	-0.939213	-0.924542	-0.314778	-0.22529	0.71118
YBL091C-A	SCS22	SCS22	D	-0.106959	0.667825	0.0389724	0.158727	-0.327934	0.223352
YBL091C-A	SCS22	SCS22	U	0.614915	0.690077	0.883669	-0.10758	0.872221	0.0401387
YBL094C	0	YBL094C	D	0.395211	-0.861921	-0.97623	-0.518815	-0.798881	-0.167431
YBL094C	0	YBL094C	U	-0.893155	-0.187927	-0.280749	-0.401294	-0.732971	0.644108
YBL095W	0	YBL095W	D	-0.282254	0.209243	-0.960062	-3.1295	0.0202829	0.154806
YBL095W	0	YBL095W	U	-0.523838	-0.411106	0.219515	0.539027	0.107384	0.111411
YBL096C	0	YBL096C	D	-1.41	-1.72088	-0.872773	-0.67824	-0.810975	1.4894
YBL096C	0	YBL096C	U	-0.437551	-1.44334	-0.373756	-1.82007	-0.240162	-0.185968
YBL098W	BNA4	BNA4	D	-0.879018	-0.904313	-1.16808		0.855428	-0.202014
YBL098W	BNA4	BNA4	U	-0.41897	-1.32092	-0.00995577	0.0788053	0.0384869	0.45162
YBL101C	ECM21	ECM21	D	-0.432312	-0.531597	1.37616	-1.19773	0.316864	-0.0514771
YBL102W	SFT2	SFT2	D	-0.709403	-0.511296	-0.321885	-0.533039	0.0973339	-0.266336
YBL102W	SFT2	SFT2	D	-0.307539	-0.265839	-0.743464	0.49236	-0.227983	0.419369
YBL102W	SFT2	SFT2	U	0.393441	0.953191	0.693533	1.25564	0.79704	0.591939
YBL104C	0	YBL104C	D	-2.98996	0.101666	-0.922736		0.333823	0.639847
YBL104C	0	YBL104C	U	-1.3375	-0.232629	-0.203726	-0.94298	0.346751	0.107215
YBL106C	SRO77	SRO77	D	-1.57795	-0.350044	-1.94578	0.84229	-0.498442	0.478424
YBL106C	SRO77	SRO77	U	0.703212	1.39211	0.869814	-0.023651	0.669119	0.150018
YBL107C	0	YBL107C	D	-0.768581	-0.590411	-0.764934	-0.122686	-0.29683	-0.00198631
YBL107C	0	YBL107C	U	-0.150988	0.0648686	0.671959	-0.280949	0.145624	0.35718
YBR001C	NTH2	NTH2	D	0.33274	0.00625723	0.325851	0.172875	0.375889	0.144071
YBR001C	NTH2	NTH2	U	-0.186179	0.271895	-0.212092	-0.0242812	0.0826906	0.404313
YBR005W	RCR1	RCR1	U	0.514444	0.420278	-0.116477		0.568251	0.45316
YBR005W	RCR1	RCR1	D	0.283016	0.373239	-0.415646	0.252804	0.484235	0.142386
YBR006W	UGA2	UGA2	D	3.4851	3.13937	2.83044	2.04915	3.02687	0.627047
YBR006W	UGA2	UGA2	U	1.85125	-0.454577	0.247428	0.359496	0.961082	0.976293
YBR007C	DSF2	DSF2	D	0.146071	-0.817487	-0.532396	-0.0955208	-0.248147	-0.181462
YBR007C	DSF2	DSF2	U	-0.150465	0.567917	0.148014	-0.746068	0.233684	-0.28151
YBR008C	FLR1	FLR1	U	0.0231602	0.102978	0.594169		0.944959	-0.0629617
YBR008C	FLR1	FLR1	D	-0.569528	-0.138377	-0.173194	-0.323843	0.223886	0.185763
YBR009C	HHF1	HHF1	D	-1.74162		-0.510323			0.837423									4	-2	154	177	181	167	222	139	115
YBR009C	HHF1	HHF1	U	-0.984025		-0.697943	-3.21702	-1.38266	-0.683158
YBR010W	HHT1	HHT1	D	-0.555888	-1.30504	0.0671187	-0.176508	-0.185957	0.587708
YBR010W	HHT1	HHT1	U	-0.0404685	-0.461577	-1.05208	-1.4267	-0.149843	-0.799724
YBR012C	0	YBR012C	D	-0.0815793	0.586692	0.467859		0.262754	-0.113723
YBR012C	0	YBR012C	U	0.130069	-0.350078	-0.0762322	0.246635	-0.135812	-0.300636
YBR013C	0	YBR013C	D	-0.103937	0.390352	-0.0471291		0.0666846
YBR013C	0	YBR013C	U	-0.0247718	0.49426	0.406169	-0.364402	0.573348	0.167829
YBR014C	0	YBR014C	U	-1.05234	-0.218396	0.333008		-0.456349	-0.0561818
YBR014C	0	YBR014C	D	-0.493893	-0.733754	-0.13861	-0.555251	-0.258442	-0.445939
YBR015C	MNN2	MNN2	U	-0.0571361	0.544974	-0.22704	-1.36147	-1.90411	-0.910342
YBR016W	0	YBR016W	U	-0.160755	-0.463147	-0.0906708		0.0602409	0.137304
YBR016W	0	YBR016W	D	0.207932	0.108535	0.92906	0.463113	0.559269	0.129104
YBR018C	GAL7	GAL7	U	0.580488	0.542866	0.172442		0.833869	0.615414
YBR018C	GAL7	GAL7	D	0.298027	-0.18341	1.37247	-1.11319	1.11363	-0.128143
YBR019C	GAL10	GAL10	D	0.418361	0.0444722	-0.606175	-0.673172	0.0256076	0.522641
YBR019C	GAL10	GAL10	U	-1.97147	-0.325246	-0.859106	0.404838	0.301009	1.21874
YBR020W	GAL1	GAL1	U	2.01362	0.351421	1.14132	0.888372	-0.246712
YBR020W	GAL1	GAL1	D	0.463565	-0.0363688	-0.0804338	-0.746774	-0.202421	0.688325
YBR020W	GAL1	GAL1	D	1.04921	-0.136492	-0.18045	-0.127688	-0.0164907	0.520987
YBR020W	GAL1	GAL1	U	-0.139846	0.438052	-0.768706	-0.241549	-0.238978	1.62133
YBR020W	GAL1	GAL1	U	0.815984	0.164092	1.6474	-0.00421703	-0.266545	1.63147
YBR022W	POA1	POA1	D	-0.48536	-0.395237	-0.348565	-0.730633	-0.366462
YBR022W	POA1	POA1	D	-0.965597	-0.505833	-0.481754	-0.815552	-0.00700448	0.117192
YBR022W	POA1	POA1	U	-0.705728	-1.24594	-0.257366	-0.628443	0.319062	0.133898
YBR023C	CHS3	CHS3	D	0.512496	1.58609	0.502625	-0.486668	0.711168	0.476681
YBR023C	CHS3	CHS3	U	-0.851407	-0.879364	-1.11404	-0.653628	-1.58782	-0.383126
YBR024W	SCO2	SCO2	D	-0.337384	1.03096	0.163793		0.623281	-0.509842
YBR024W	SCO2	SCO2	U	-0.190114	0.227659	0.384834	0.287714	0.330195	1.2149
YBR025C	0	YBR025C	D	-1.25808	0.239677	-2.39124	-4.83572	-3.18432	-2.65133
YBR025C	0	YBR025C	U	-0.954097	0.535712	0.750641	-6.20181	-4.03361	-1.30792
YBR027C	0	YBR027C	D	0.100828	-0.306703	-0.118631		-0.095318
YBR027C	0	YBR027C	U	0.408322	0.194896	0.208185	0.258548	-0.407939	-0.827408
YBR028C	0	YBR028C	D	0.433793	1.27989	0.940667	-0.563663	-0.172902	0.857003
YBR028C	0	YBR028C	U	0.174748	0.118393	1.07209	-0.508906	0.659511	0.00839266
YBR031W	RPL4A	RPL4A	D	0.0632435		-0.145031	-3.50821	0.527469	1.29098
YBR032W	0	YBR032W	D	0.448664	-0.263259	0.288551	0.0492858	0.387188	-0.0458596
YBR032W	0	YBR032W	U	-0.668627	-1.78176	-0.390978	-0.212592	-0.265216	-1.12688
YBR033W	EDS1	EDS1	D	-0.290886	-1.36051	0.467301		-0.49197	0.0771726
YBR033W	EDS1	EDS1	U	0.081349	0.382607	-0.160878	-0.667121	-0.327083	-0.641838
YBR034C	HMT1	HMT1	D	-1.10469	-1.11918	-0.237903	-0.986907	-0.9872	-0.507637
YBR034C	HMT1	HMT1	U	0.833448	1.02922	0.931547	-0.179675	1.2123	0.542352
YBR040W	FIG1	FIG1	D	-0.190218	-0.763522	-0.916659	-0.229878	0.183376	0.260198
YBR040W	FIG1	FIG1	U	-0.611202	-0.143988	-0.264671	-0.124535	-0.661131	-0.770265
YBR042C	0	YBR042C	D	0.16872	-0.0496811	-0.279494	-0.248204	0.250901	0.428991
YBR042C	0	YBR042C	U	-1.99922	-1.13009	-0.550386	-0.522056	-1.07949	-0.571561
YBR043C	QDR3	QDR3	D	-0.65341	0.0797459	0.448841	-0.342037	0.445393
YBR043C	QDR3	QDR3	U	-0.144639	0.659575	0.428125	-0.496256	-0.309175	0.781775
YBR044C	TCM62	TCM62	D	-0.294628	-2.69826	-2.24668	-0.912019	-2.85097	-1.25442
YBR044C	TCM62	TCM62	U	-0.74214	-2.8554	-0.711128	-2.40852	-1.24546	-1.32452
YBR045C	GIP1	GIP1	D	-0.650362	-0.667211	-1.1751	-0.570778	-0.393256	0.0621292
YBR045C	GIP1	GIP1	U	-0.0410373	-0.834109	0.467643	0.302625	0.404248	0.380883
YBR046C	ZTA1	ZTA1	D	-0.586479	-0.529525	-0.472448	-0.657532	0.473539	0.181516
YBR046C	ZTA1	ZTA1	D	-0.00747899	-0.342245	-0.13157	-0.175919	0.666339	0.986549
YBR046C	ZTA1	ZTA1	U	-0.587674	-0.198118	-0.774967	0.21697	-0.265713	0.729295
YBR047W	FMP23	FMP23	D	-0.389132	-0.663113	-0.6548	-0.510034	0.117681
YBR047W	FMP23	FMP23	U	0.0696081	0.101274	-0.695259	-0.0910476	0.032324	0.0890926
YBR050C	REG2	REG2	D	-0.457666	-0.943414	-0.556673	-0.248389	-0.251999	0.0833123
YBR050C	REG2	REG2	U	-0.24811	-0.18252	-0.477212	-0.0515263	0.296918	0.22518
YBR051W	0	YBR051W	D	-0.254633	-0.0374119	-0.30087		-0.633134	0.661921
YBR051W	0	YBR051W	U	-0.191816	-0.54606	-0.303055	-1.75322	-0.00662263	-0.279733
YBR052C	RFS1	RFS1	D	-1.03764	-2.70198	-0.241776	-0.171221	-0.254635	5.68678
YBR052C	RFS1	RFS1	U	0.39659	-0.447708	0.242543	-0.116356	0.23919	-0.258198
YBR053C	0	YBR053C	D	-0.0900011	-1.26098	-0.500114	-0.347429	-0.153099	0.770439
YBR053C	0	YBR053C	U	0.209945	0.740167	0.132166	0.572005	-0.39851	0.145142
YBR054W	YRO2	YRO2	U	0.253319	0.629976	0.865614	-0.0397616	0.615779
YBR054W	YRO2	YRO2	D	-0.528283	-0.370802	-0.339506	0.220015	-0.195227	0.0344319
YBR054W	YRO2	YRO2	U	-0.00708089	0.53386	0.529967	-0.263781	-0.16942	-0.131365
YBR056W	0	YBR056W	U	-1.2921	-1.27572	-1.87705	-1.82279	-1.12912
YBR056W	0	YBR056W	D	-2.82359	-1.24262	-1.99077	-2.13584	-2.05368	-1.32374
YBR057C	MUM2	MUM2	D	1.25226	-0.0698258	0.632228		-0.386008
YBR057C	MUM2	MUM2	U	-1.23747	-0.751225	-0.606871	-0.531198	-0.217057	-1.38335
YBR058C	UBP14	UBP14	D	-0.552614	-1.10396	-1.17762	-0.886052	-2.02991	-0.187563
YBR058C	UBP14	UBP14	U	0.851051	0.776736	0.19864	-0.312443	-0.271112	-1.22978
YBR059C	AKL1	AKL1	D	0.261055	-0.0196462	0.245571	-0.44189	0.127108	-0.212429
YBR059C	AKL1	AKL1	U	0.361628	0.38949	0.501001	-0.368183	0.405694	-0.503444
YBR062C	0	YBR062C	D	0.0308157	0.26566	-0.536758	-0.63062	-0.342928	-0.577636
YBR062C	0	YBR062C	U	-0.630847	-0.496202	-0.841447	-0.87455	-0.230211	-0.315907
YBR063C	0	YBR063C	D	0.122152	0.0847817	0.196666	-0.840154	-0.0359115	0.480417
YBR063C	0	YBR063C	U	0.217146	-0.285709	0.0382492	-1.0303	-0.785986	-0.155447
YBR064W	0	YBR064W	D	-1.21434	-0.561574	-0.757318	-2.34315	0.765551	0.200092
YBR064W	0	YBR064W	U	0.0408994	0.203513	-0.362927	-0.507412	-0.11556	-0.542739
YBR065C	ECM2	ECM2	D	-0.392857	-0.0694349	-0.116154	-0.277104	0.604531	1.10554
YBR065C	ECM2	ECM2	U	-0.316203	-1.37087	-0.416111	-0.738526	-0.530316	-0.167842
YBR066C	NRG2	NRG2	D	0.234474	-0.559007	-0.292353	-0.545997	-0.0212124	0.0849995
YBR066C	NRG2	NRG2	U	-0.963231	0.146273	-0.391279	-0.783729	-0.00704894	0.0801121
YBR067C	TIP1	TIP1	D	-0.117715	-0.772544	-0.0532923	-0.669836	0.186906	0.00479618
YBR067C	TIP1	TIP1	U	-0.461423	-0.31434	0.135833	0.327511	0.229966	0.591652
YBR071W	0	YBR071W	D	-0.0971765	-0.270629	0.527865	0.569327	0.182166	2.37413
YBR071W	0	YBR071W	U	0.142969	-0.20723	0.0763651	0.382925	0.221173	0.931766
YBR072W	HSP26	HSP26	D	0.0858357	-0.649965	-0.798483	0.0429273	0.180802	0.650255
YBR072W	HSP26	HSP26	U	-0.377103	-0.78015	-0.371552	-0.502463	0.278302	0.210828
YBR073W	RDH54	RDH54	D	-0.550446	-0.0536272	-0.0482217	-2.89361	-1.03883	3.91724
YBR073W	RDH54	RDH54	U	-1.20571	-0.0918699	-0.0838509	0.389787	-0.746649	0.448622
YBR074W	0	YBR074W	D	0.101214	-0.523699	-0.398387	0.443203	0.122166	0.0122544
YBR074W	0	YBR074W	U	0.675415	0.911404	0.527263	0.149515	1.03373	0.16891
YBR075W	0	YBR075W	D	0.12641	-0.134484	1.49258	0.373549	1.09516	1.79487
YBR075W	0	YBR075W	U	-0.318833	-0.355808	-0.582054	-0.23001	-0.0560531	0.850786
YBR076W	ECM8	ECM8	D	0.0871813	0.0199925	-0.0983895	-0.590289	0.449622	0.822368
YBR077C	SLM4	SLM4	D	0.579252			-1.46346	5.87805	1.37099
YBR077C	SLM4	SLM4	U	1.62058		1.24114	-0.0984594	2.57995	2.54065
YBR083W	TEC1	TEC1	D	0.588958	-0.589626	0.537451	0.390547	-0.602684	0.637156
YBR083W	TEC1	TEC1	U	0.393557	1.14658	-0.12999	0.558088	0.265435	0.821899
YBR084W	MIS1	MIS1	D	0.741137	0.125614	0.272485	-0.167304	-0.677855	-0.935032
YBR084W	MIS1	MIS1	U	-0.00529181	-0.918079	-1.26212	-0.385502	-0.884874	-0.863813
YBR090C	0	YBR090C	D	-0.473604	-0.029229	-0.411311	0.0598014	0.391728	0.354799
YBR090C	0	YBR090C	U	0.210371	0.327776	-0.119138	0.84015	0.0527665	0.553439
YBR090C-A	0	YBR090C-A	D	-0.894959	-0.815609	0.725837	-0.266232	-0.751362	0.36595
YBR090C-A	0	YBR090C-A	U	-0.50894	-0.635477	0.0732447	-0.820984	-0.455214	-0.152577
YBR092C	PHO3	PHO3	D	-0.155932	-1.03559	-0.686923	-0.875128	0.602982	0.190752
YBR092C	PHO3	PHO3	U	1.05451	0.469179	0.126715	-1.33552	1.22306	-0.0168166
YBR093C	PHO5	PHO5	D	0.728881	-0.0143996	0.405309	0.256439	1.35302	0.371619
YBR093C	PHO5	PHO5	U	-0.164824	1.11909	0.634758	-0.314872	-0.0804043	1.05311
YBR094W	0	YBR094W	U			-0.205662	0.380655	0.155028	0.856935
YBR094W	0	YBR094W	D	0.371297	0.872794	-0.360073	-1.51292	0.868578	0.43468
YBR094W	0	YBR094W	U	0.97265	0.550562	-0.222212	1.43404	0.720762	1.39824
YBR098W	MMS4	MMS4	D	0.450689		1.50821	-1.76077	-1.64774	0.065301
YBR098W	MMS4	MMS4	U	0.885001	1.55047	0.349289	-0.491752	1.40734	1.46261
YBR099C	0	YBR099C	D	-1.98961	0.317529	-1.46217	-1.54435	0.855771	-0.207196
YBR099C	0	YBR099C	U	1.44412	-0.50012	-0.260464	-2.55694	-0.367528	1.35676
YBR100W	0	YBR100W	D	-0.0343603	0.897895	0.955715	0.00841255	-0.381721	0.47306
YBR100W	0	YBR100W	U	1.80636	0.236024	0.421216	0.943401	0.776467	0.71336
YBR101C	FES1	FES1	D	1.37363	0.803003	0.496028	-0.297039	0.267863	-0.374903
YBR101C	FES1	FES1	U	-0.0723831	-0.0434647	-0.613134	-1.03767	-0.588655	0.237942
YBR103W	SIF2	SIF2	D	-0.355639	-1.30763	-0.912667	-1.0216	-1.32729	-0.354061
YBR103W	SIF2	SIF2	U	-0.426299	-0.660998	-0.572882	-0.963179	-0.068676	-0.655112
YBR104W	YMC2	YMC2	D	0.626831	-0.164743	0.499942	0.538342	0.469745	-0.627563
YBR104W	YMC2	YMC2	U	-0.276671	0.188222	-0.434859	0.275425	0.0869781	-0.457934
YBR105C	VID24	VID24	D	-2.39146	-0.283618	1.97481	-0.42358	1.68399	0.260751
YBR105C	VID24	VID24	U	-0.144919	0.412888	-0.270548	0.579592	-1.60156	1.54253
YBR107C	IML3	IML3	D	-0.720714	-0.0924681	0.932096		0.546352	0.615757
YBR107C	IML3	IML3	U	0.395671	-1.03164	-0.848837	-0.905128	-0.0802793	0.292514
YBR108W	0	YBR108W	D	0.732608	-0.303688	-0.0959214	-0.372539	0.258062	0.469623
YBR113W	0	YBR113W	U	0.505188	0.068653	-0.0999993		0.672399	0.938548
YBR113W	0	YBR113W	D	-0.556438	1.44439	-0.195122	-0.546922	0.0944665	0.649657
YBR114W	RAD16	RAD16	D	-0.837346	0.424213	0.24113	-0.693504	-0.641753	0.0502071
YBR114W	RAD16	RAD16	U	0.297366	-0.22214	0.516871	-0.406344	-0.229008	0.366631
YBR116C	0	YBR116C	D	0.0317251	-0.0253219	-0.622594	0.0220568	0.384981	0.213859
YBR116C	0	YBR116C	U	-0.680408	0.65701	-0.292551	-1.10117	-0.660653	0.157073
YBR119W	MUD1	MUD1	D	0.543754		-0.935907		-0.409232	-0.627957
YBR120C	CBP6	CBP6	D	-1.15229	0.0636981	0.514449	0.790788	-0.705521	2.4504
YBR120C	CBP6	CBP6	U	0.261035	0.786579	0.724696	1.2336	0.576088	0.946291
YBR125C	PTC4	PTC4	D	0.197592	1.34567	-0.758919	-1.00423	-0.637496	0.704703
YBR125C	PTC4	PTC4	U	-0.606502	0.121426	-0.98307	-1.26626	0.0263521	-1.21729
YBR127C	VMA2	VMA2	U	3.04097	2.14189	4.23067		2.64882	1.26095
YBR128C	ATG14	ATG14	D	-0.310102	0.720031	-1.31479	-0.985132	0.207945	-0.143775
YBR128C	ATG14	ATG14	U	0.812281	0.0194247	0.0289653	-1.6935	1.08787	1.08608
YBR129C	OPY1	OPY1	U	0.054534	-0.13599	0.0237868		0.612007	0.363418
YBR129C	OPY1	OPY1	D	1.08966	-0.198089	-0.501384	0.131104	-0.266715	0.590663
YBR130C	SHE3	SHE3	D	-0.195054	0.70407	0.0549788	-0.138668	-0.182414	0.349346
YBR130C	SHE3	SHE3	U	-0.552793	0.0738408	-0.151608	-0.119257	0.0682311	-0.284957
YBR134W	0	YBR134W	D	0.611524	1.19092	0.976483	0.454069	-0.158088	0.148752
YBR134W	0	YBR134W	U	-1.15289	0.0993126	-0.356601	-0.065576	-1.45786	-0.356691
YBR137W	0	YBR137W	D	0.698813	-0.243231	1.59036	0.596653	0.64868
YBR137W	0	YBR137W	D	1.05051	-0.111466	1.834	-0.302069	0.929106	0.187404
YBR137W	0	YBR137W	U	-0.412905	-0.310124	0.149883	0.37152	0.0115675	-0.688786
YBR138C	0	YBR138C	D	0.417025	1.23904	-0.755406	-0.48784	-0.750859	-0.173855
YBR138C	0	YBR138C	U	-0.00526145	0.665828	0.214116	0.179805	0.743521	-0.0580461
YBR139W	0	YBR139W	D	-0.0600043	0.591022	0.702845	-0.786755	-0.571512	0.355182
YBR139W	0	YBR139W	U	-0.136974	-0.0388005	-0.53353	-0.513597	-0.549373	-0.815126
YBR141C	0	YBR141C	D	0.360003	-0.923789	0.834256	-0.0195205	0.0172554	0.0240205
YBR141C	0	YBR141C	U	0.0605053	0.380035	0.227598	-0.317573	-0.270393	-0.0189207
YBR144C	0	YBR144C	U	0.225547	-0.0819681	-0.337139		0.23025	-0.0823289
YBR144C	0	YBR144C	D	0.501029	-0.712412	-0.0415783	-0.0894296	-0.437423	0.1471
YBR145W	ADH5	ADH5	U	0.160762	0.619435	-0.267104		-0.443125	0.176916
YBR145W	ADH5	ADH5	D	0.16499	-0.748491	-0.0688868	0.556665	0.0685259	-0.330361
YBR146W	MRPS9	MRPS9	D	-0.23308	0.55509	0.991587	0.0749483	-2.12326	0.146187
YBR147W	0	YBR147W	D	0.108792	0.287004	-0.0270005	-0.272992	-0.113408	0.350385
YBR147W	0	YBR147W	U	0.221384	0.660542	0.520984	0.164051	-0.0743354	-0.240592
YBR148W	YSW1	YSW1	D	-0.424555	0.0713328	0.522385	-0.10941	-0.12427	-0.115499
YBR148W	YSW1	YSW1	U	0.0135521	0.426604	0.722963	-0.239038	0.479677	0.04095
YBR149W	ARA1	ARA1	D	-0.315919	-1.73524	0.690252	0.335896	0.945984	0.376431
YBR150C	TBS1	TBS1	D	0.218721	-0.460023	-0.648632	-0.776704	-0.80261	-0.368185
YBR150C	TBS1	TBS1	U	0.953403	-0.736781	0.24763	-0.0339732	-1.47455	-0.218039
YBR150C	TBS1	TBS1	U	1.0414	-0.652746	1.18135	0.53303	-1.3329	0.0738295
YBR151W	APD1	APD1	D	-0.22578	-0.487914	-0.193962	-0.588638	-0.0872036	0.476883
YBR151W	APD1	APD1	U	-0.181581	0.91405	-0.330483	-0.554462	-0.723194	0.553896
YBR156C	SLI15	SLI15	D	-1.98691	4.90904		0.437583	1.05008	1.14121
YBR157C	ICS2	ICS2	D	3.60173	1.05596	2.1498		0.950224
YBR157C	ICS2	ICS2	D	0.0184311	-0.0329107	0.415296	0.714493	0.81311	0.211584
YBR157C	ICS2	ICS2	U	0.835622	-0.726416	0.545161	0.0422312	0.369096	0.481281
YBR158W	AMN1	AMN1	D	0.0405126	0.193994	0.151893	-1.99073	1.17079	-0.00916212
YBR159W	0	YBR159W	U	-0.865406	1.39505	-0.592816	-2.04056	-0.0670775
YBR159W	0	YBR159W	D	0.57715	0.832698	-0.0629633	-0.803712	0.95156	1.38309
YBR161W	CSH1	CSH1	D	-0.382457	-0.191608	-0.480209	-0.426136	0.0122714	0.0468267
YBR161W	CSH1	CSH1	U	0.252937	0.18857	-0.323478	0.364186	-0.741387	0.712267
YBR162W-A	YSY6	YSY6	D	-0.545643	-1.73833	0.332077	-0.0991755	-0.258406
YBR162W-A	YSY6	YSY6	U	0.130135	0.350397	-0.214069	-0.169365	0.53024
YBR164C	ARL1	ARL1	U	-3.55208	-0.621204		-2.55152	-5.54223
YBR169C	SSE2	SSE2	D	0.929507	1.0866	0.00926424	-0.229676	1.21815	0.107637
YBR169C	SSE2	SSE2	U	0.165669	0.786546	1.11639	-0.469931	0.93498	-0.336547
YBR170C	NPL4	NPL4	D	-0.7769	0.443803	-0.0558929	-0.702764	-2.37189	0.0793542
YBR172C	SMY2	SMY2	U	0.181372	0.89674	-2.59847	-0.715941	-0.276852
YBR172C	SMY2	SMY2	D	0.00973684	-0.293803	-0.66413	-1.58305	0.0355063	0.886272
YBR173C	UMP1	UMP1	D	0.167395	-1.64265	-0.354575	0.214803	0.00459344	2.38404
YBR176W	ECM31	ECM31	D	1.10949	0.205154	0.511678	0.51285	-0.37627	-0.174009
YBR176W	ECM31	ECM31	U	-0.50979	-0.933343	-0.27309	-0.48482	-0.490483	-0.277399
YBR177C	EHT1	EHT1	D	0.13194	-0.520875	-0.103995	-0.385949	0.000483143	0.49226
YBR177C	EHT1	EHT1	U	-0.829464	-1.1293	-0.49157	-0.905114	-1.20599	0.477109
YBR178W	0	YBR178W	U	0.157054	0.945834	-0.285424	-0.790542	-0.649733	0.173369
YBR180W	DTR1	DTR1	D	0.67348	1.09263	0.679122	-0.0916893	0.439003	0.259511
YBR180W	DTR1	DTR1	U	-0.133288	-0.056237	-0.104241	-0.0389639	-0.472418	-0.344374
YBR182C	SMP1	SMP1	U	-0.285417	-0.982244	-0.440823	-0.809768	0.0813433	0.774747
YBR183W	YPC1	YPC1	D	-0.383685	0.40453	0.664645	1.18061	-0.0503946	0.0487107
YBR183W	YPC1	YPC1	U	0.368108	-0.239545	-0.354347	0.169354	0.754072	-0.480238
YBR184W	0	YBR184W	D	0.712627	-0.0912385	0.529215	0.792994	1.06259	0.196514
YBR184W	0	YBR184W	U	0.00868926	-1.60173	0.284034	0.583626	0.857032	0.941533
YBR185C	MBA1	MBA1	D	1.14395	0.602321	0.31497	0.131911	0.0614153	-0.178389
YBR185C	MBA1	MBA1	U	-0.732442	-2.94011	-0.643881	-0.199553	0.182416	-0.617862
YBR186W	PCH2	PCH2	D	0.0415128	-0.433264	0.0841772	0.401038	-0.33863	-0.323333
YBR186W	PCH2	PCH2	U	1.27729	0.777514	1.53855	1.60333	0.788137	1.18776
YBR187W	0	YBR187W	D	0.373849	1.07508	0.134621	0.80565	0.143567	0.333657
YBR187W	0	YBR187W	U	0.161664	-0.189725	-0.240867	-0.28968	1.21747	0.521324
YBR188C	NTC20	NTC20	D	0.345572	0.173979	0.486816	0.276329	0.231425	-0.259238
YBR188C	NTC20	NTC20	U	-0.0510079	0.249464	-0.279386	-0.198359	-0.879066	0.482613
YBR195C	MSI1	MSI1	D	-1.40867		2.74079	-1.15573	-0.0964198	0.0196033
YBR195C	MSI1	MSI1	U	0.0667433	1.42251	-0.266168		-0.297455	0.101821
YBR197C	0	YBR197C	D	-1.78671	-0.0174843	2.14303	0.633655	2.57932	1.07291
YBR197C	0	YBR197C	U	-1.98289	0.756758	0.727135	0.573066	0.386703	1.73038
YBR199W	KTR4	KTR4	D	-0.174499	0.692909	0.160807		-0.538397	-0.167986
YBR199W	KTR4	KTR4	U	-0.158215	-0.527456	-0.505858	0.476392	-0.688602	-0.176787
YBR201W	DER1	DER1	D	0.133407	0.188428	0.171328	-0.229311	0.0466616	0.726313
YBR203W	COS111	COS111	D	1.05348	1.27355	-0.546497	-1.41566	0.703853	0.286151
YBR203W	COS111	COS111	U	-0.0375366	-0.723636	-0.622915	-0.815767	-0.182603	0.0617611
YBR204C	0	YBR204C	D	0.30179	0.13841	0.648007	-1.03771	0.57118
YBR204C	0	YBR204C	U	0.168503	-1.3046	-0.532119		-0.847518	-0.453309
YBR205W	KTR3	KTR3	U	-0.25714	-0.126975	0.427198		-0.360009	0.289681
YBR205W	KTR3	KTR3	D	0.435116	-0.473287	0.713923	-1.28441	-0.130741	0.355544
YBR206W	0	YBR206W	D	0.233816	0.304104	-0.0515113	-1.37289	0.846761	0.0485803
YBR206W	0	YBR206W	U	-0.684935	-0.180383	0.134437	-1.21413	-0.100006	0.654083
YBR207W	FTH1	FTH1	D	0.32694	-0.194727	-0.137315	-1.22921	0.221113	0.204209
YBR207W	FTH1	FTH1	U	-0.102591	-0.475993	-0.400171	0.513453	0.393289	-0.54538
YBR208C	"DUR1,2"	"DUR1,2"	D	1.63441	-0.273173	-0.413983	-0.478484	0.72265	-0.15594
YBR208C	"DUR1,2"	"DUR1,2"	U	0.198206	0.893592	0.534883	0.367718	-0.373369	-0.70216
YBR210W	ERV15	ERV15	D	-0.295798	1.27289	-0.185457	-0.691783	0.507406	-0.185164
YBR210W	ERV15	ERV15	U	-0.619065	-0.392408	0.597461	0.198041	-1.60997	-1.05033
YBR212W	NGR1	NGR1	D	0.599035	0.452903	0.15819	-1.37114	-0.616424	-0.0453939
YBR212W	NGR1	NGR1	U	0.201845	0.553289	0.404661	-0.246503	-0.576798	0.229125
YBR213W	MET8	MET8	D	-0.0695149		-2.98623			-1.67275
YBR213W	MET8	MET8	U	0.889922		-0.214683		1.43654
YBR213W	MET8	MET8	U	1.38925	1.5799	0.997879		-0.853746
YBR214W	SDS24	SDS24	U	0.329473	-0.209872	0.279723		-0.562736	-0.48899
YBR214W	SDS24	SDS24	D	-0.62	-0.0601996	-0.3093	-0.288175	-0.609743	0.781651
YBR215W	HPC2	HPC2	D	-0.720887		-1.63069	-3.81101	-0.559599	-1.06211
YBR215W	HPC2	HPC2	U	-1.60826	-2.73669	-0.902618	-3.97845	-1.92325	-0.374728
YBR216C	YBP1	YBP1	D	-1.33101		0.40028	-2.13761	1.25192	-0.376729
YBR216C	YBP1	YBP1	U	0.0159682	0.0132667	-0.0795238	0.184079	-0.527755	-0.391799
YBR217W	ATG12	ATG12	D	-0.104395	-0.940874	-1.11093		-3.26589	-4.82786
YBR217W	ATG12	ATG12	U	-0.239374	-0.405679	-1.67725	-3.57222	-2.91176	-5.64516
YBR218C	PYC2	PYC2	D	0.542281	0.198772	0.551816		-0.29427	-0.397678
YBR218C	PYC2	PYC2	U	-0.0405487	1.05529	0.142328		0.44265	-0.74702
YBR219C	0	YBR219C	D	0.122529	0.210039	-0.453387	-0.969803	0.186988	-0.54681
YBR219C	0	YBR219C	U	-0.0666614	-0.837959	-0.311794	-1.20464	-0.314406	-0.174698
YBR220C	0	YBR220C	D	-0.687046	0.0631516	0.130085	-1.58708	-0.459297	0.511831
YBR220C	0	YBR220C	U	-0.106642	0.183814	0.229835	-0.419669	0.186536	-0.191047
YBR222C	PCS60	PCS60	D	-0.215442	-0.158658	0.140006	-0.760316	0.0917798	0.386334
YBR222C	PCS60	PCS60	U	0.00496579	-0.178465	1.22904	-3.42308	-0.796276	-0.383339
YBR223C	TDP1	TDP1	U	-0.524682	-1.11481	-0.680533		-0.364498	0.288315
YBR223C	TDP1	TDP1	D	0.846804	-0.411559	-0.34839	-2.85775	-0.315137	-0.158625
YBR224W	0	YBR224W	D	0.436164	-0.225673	-0.47673	-2.19707	-0.264883	0.108811
YBR224W	0	YBR224W	U	-0.157545	-1.11997	-0.501976	-0.953766	0.352708	0.183751
YBR225W	0	YBR225W	D	-0.401873	0.480893	0.423273	-2.26728	0.807393	0.114931
YBR225W	0	YBR225W	U	-0.677175	-0.739396	-0.803559	-0.768989	-0.322246	0.269073
YBR226C	0	YBR226C	D	0.139955	-0.958151	-0.679051		-0.0569228	0.0599051
YBR226C	0	YBR226C	U	-0.865916	-1.47561	-0.573089	-0.493742	0.00375207	0.353912
YBR227C	MCX1	MCX1	U	-3.18775	-1.82201	-3.40052		-1.77227	-0.39507
YBR227C	MCX1	MCX1	D	-0.167459	-0.341444	-1.16606	-0.369901	-0.192114	-0.0502875
YBR227C	MCX1	MCX1	U	-0.876316	-0.435195	-0.465205	0.738563	-0.752316	0.318298
YBR228W	SLX1	SLX1	D	-0.164016	0.46137	-0.666825	-0.723472	0.785096
YBR228W	SLX1	SLX1	U	0.350841	0.447771	-0.0320108	0.289709	-0.337283	0.47908
YBR229C	ROT2	ROT2	D	0.0224683	-1.26071	-1.30407	-1.26281	0.305166	-0.456889
YBR229C	ROT2	ROT2	U	-0.217037	-3.97937	-0.689773	-0.0972313	-0.887369	0.0590908
YBR230C	OM14	OM14	D	0.481172	0.399964	0.694668	-1.0651	0.904741	-0.0939929
YBR230C	OM14	OM14	U	0.409416	-0.643236	0.226251	-0.273614	0.127461	0.432244
YBR231C	SWC5	SWC5	D	0.0470652		0.911445	-2.0236		0.631498
YBR231C	SWC5	SWC5	U	2.27462	-1.49835	0.360316		-2.50159	0.192777
YBR232C	0	YBR232C	D	-0.0295177	0.503123	-0.0408179	-0.376928	1.03329	-0.550362
YBR232C	0	YBR232C	U	1.25299	0.362651	0.621726	0.661884	0.922157	0.258007
YBR233W	PBP2	PBP2	D	-0.692701	-0.146904	-0.1191	-0.986039	-0.561264	-0.594888
YBR233W	PBP2	PBP2	U	0.347627	0.697113	0.0157743	-0.794705	0.125369	-0.656304
YBR235W	0	YBR235W	U	0.801695	0.533719	0.0401449		0.756118	-0.38779
YBR235W	0	YBR235W	D	0.474386	-0.54764	0.353913	-0.267369	-0.589963	-0.139073
YBR238C	0	YBR238C	U			1.00333	0.598505	0.676608
YBR238C	0	YBR238C	D	1.47874	-1.01852	-0.179335	-0.048685	0.706506	0.407625
YBR239C	0	YBR239C	D	-0.000341588	-0.00857173	0.208783		-0.559494	0.0776495
YBR239C	0	YBR239C	U	0.671951	0.408178	0.378256	0.619468	0.780823	0.196185
YBR240C	THI2	THI2	D	0.337032	0.743301	1.34464	-1.32305	1.26083	-0.989149
YBR240C	THI2	THI2	U	1.02162	0.876955	0.0848553	-0.403329	0.66847	-0.495126
YBR241C	0	YBR241C	U	0.221062	0.131129	1.313		0.432549	0.151691
YBR241C	0	YBR241C	D	-0.509598	-0.0343776	0.0210707	0.0240524	-0.240227	0.117636
YBR242W	0	YBR242W	D	0.0109739	-0.614603	0.888328	-1.4854	0.574803	0.0363016
YBR242W	0	YBR242W	U	0.739861	0.604309	0.219945	-0.0599807	0.821048	-0.179173
YBR242W	0	YBR242W	U	0.416114	0.100123	0.735852	0.391913	1.03996	0.555954
YBR244W	GPX2	GPX2	D	0.308298	-0.0519249	-0.214065	-0.293151	-0.21582	0.0236689
YBR244W	GPX2	GPX2	U	0.510059	0.385872	0.839142	-0.0669748	0.632018	0.493826
YBR245C	ISW1	ISW1	D	0.34709	-0.94988	-0.354622		0.526651	-0.616252
YBR245C	ISW1	ISW1	U	-0.0614466	-0.543213	-0.714026	-0.537515	0.205262	-0.490481
YBR246W	0	YBR246W	D	-0.748333			-2.36838	-3.46164	-0.0328156
YBR246W	0	YBR246W	U	0.443035	-0.921355	-1.22629		-1.13709	0.0736381
YBR248C	HIS7	HIS7	D	0.096635	-0.354896	-0.0977077	-0.617171	-0.168125
YBR248C	HIS7	HIS7	U	0.433503	-0.107956	-0.0990168		-0.278934	0.0716163
YBR249C	ARO4	ARO4	D	-0.264851	0.468161	-0.29751	-0.970819	0.226806
YBR249C	ARO4	ARO4	U	0.177232	-0.360627	0.448834	-0.0623065	0.870302	0.567706
YBR250W	0	YBR250W	D	-0.0115824	-0.0911279	0.415456	-0.000461632	-0.431045	0.423545
YBR250W	0	YBR250W	D	-1.09952	-1.39702	-0.77616	-1.8068	-0.668409	-0.260184
YBR250W	0	YBR250W	U	-0.0503946	-0.0044347	-0.309811	-0.285968	-0.197971	0.357044
YBR255W	0	YBR255W	U	-1.71537		6.13749	5.27956	4.93348	8.42185
YBR258C	SHG1	SHG1	U	0.163624	-0.730535	0.182553	-0.112185	0.319109	-0.360874
YBR259W	0	YBR259W	D	-0.749582	0.0252765	-0.0723322	-0.902537	-0.290122	1.23068
YBR259W	0	YBR259W	U	0.702522	0.397334	0.884496	0.0463156	0.940371	0.245951
YBR260C	RGD1	RGD1	D	0.627744	0.453985	0.184929	-1.28843	0.0416865	-0.924161
YBR260C	RGD1	RGD1	U	-0.216502	-1.03141	-0.725842	0.430087	-0.0506885	-0.213868
YBR261C	0	YBR261C	D	-0.0327596	0.0238466	-0.0816929		-0.137448
YBR261C	0	YBR261C	U	-0.0575522	-0.0290824	0.569379	-0.919439	-0.130533	-0.474833
YBR262C	FMP51	FMP51	D	0.171545			-1.01453	0.533447
YBR262C	FMP51	FMP51	U	0.755605	0.573661	0.478993		0.851975	0.24779
YBR263W	SHM1	SHM1	D	-0.0753009	-0.758612	-0.316656	-0.269686	-0.0904522	-0.512778
YBR263W	SHM1	SHM1	D	-0.267406	-0.281268	-0.651675	-0.634446	0.18185	-0.118462
YBR263W	SHM1	SHM1	U	0.547474	-0.190699	0.666292	0.16105	0.52426	1.51658
YBR264C	YPT10	YPT10	D	0.408226	0.348843	0.718904	-0.38086	-0.51492	-0.429601
YBR264C	YPT10	YPT10	U	0.394189	0.520707	0.262124	-0.439724	-0.873971	-0.304496
YBR269C	FMP21	FMP21	D	-0.764852	0.964245	1.339	1.03973	0.389686	0.511692
YBR270C	BIT2	BIT2	D	0.101262	0.109636	-0.247712	0.0147879	0.484234	-0.591544
YBR270C	BIT2	BIT2	U	0.0259667	0.575395	0.742159	0.0298702	0.307358	-0.138728
YBR271W	0	YBR271W	D	-0.249295		0.416664	0.948292	-0.137036
YBR271W	0	YBR271W	U	-0.761345	-0.861696	-0.511305	-0.490773	0.172413	-0.619515
YBR272C	HSM3	HSM3	D	0.960851	0.152858	-0.192235	1.19701	-0.975719	0.382937
YBR272C	HSM3	HSM3	U	-0.651294	-0.942665	-0.276304	-0.320222	0.0853559	1.99626
YBR273C	UBX7	UBX7	D	-0.0592345	0.44225	1.39096	0.521017	0.856341	0.0987
YBR273C	UBX7	UBX7	U	-0.0644425	0.107835	0.349035	0.721253	0.262917	1.67096
YBR275C	RIF1	RIF1	D	0.372346	0.451702	-0.559856	0.0374278	0.661352	-0.127434
YBR275C	RIF1	RIF1	U	-2.32427	-1.04039	-2.03195	0.218774	-1.8174	1.2308
YBR276C	PPS1	PPS1	D	0.371153	-1.72393	-0.228849	0.396988	-0.31164	0.0976483
YBR276C	PPS1	PPS1	U	1.14369	1.19376	2.10958	1.22928	1.00607	0.548373
YBR278W	DPB3	DPB3	D	0.792595	-0.202465	0.498272		1.44933	0.0485172
YBR278W	DPB3	DPB3	U	0.636811	1.7453	1.08455	6.08606	-0.219511	-0.789876
YBR280C	0	YBR280C	U	1.77858	1.61011	1.56967	1.00368	1.56733	0.955545
YBR280C	0	YBR280C	U	1.92854	1.46599	0.413584	2.08353	1.02628	1.0665
YBR281C	0	YBR281C	D	1.33987	0.756905	0.734834	0.0350957	0.302493	0.528903
YBR281C	0	YBR281C	U	1.0027	0.463772	0.254537	2.82675	0.943578	0.656865
YBR284W	0	YBR284W	D	0.208751	1.16313	1.18509	0.773698	1.11399	0.0859063
YBR284W	0	YBR284W	U	1.00535	0.0577734	1.36006	0.949552	0.708495	1.12449
YBR285W	0	YBR285W	D	-0.558391	1.94523	0.0146192		0.524678	-0.0573505
YBR285W	0	YBR285W	D	-0.554744	-0.614537	-1.25919	-0.196102	0.0563592	0.0475492
YBR285W	0	YBR285W	U	0.173226	1.26197	-0.0093885	0.778739	0.204009	-0.19127
YBR286W	APE3	APE3	D	0.506226	0.651069	1.2165	1.36763	0.0627849	0.816593
YBR286W	APE3	APE3	U	0.786442	1.44563	1.91825	1.08902	0.472771	1.61963
YBR287W	ZSP1	ZSP1	D	-0.824469	0.119251	-0.440267	-0.530065	0.248722	-0.852762
YBR287W	ZSP1	ZSP1	U	0.112637	-0.858819	0.406051	-0.375959	0.371271	-0.46532
YBR288C	APM3	APM3	D	0.310156		2.61439	0.155597	2.24588
YBR288C	APM3	APM3	U	0.298058	0.307865	-0.77991		-1.73726
YBR290W	BSD2	BSD2	D	0.468878	-1.246	-0.961548	-0.00589798	-0.770898	0.740397
YBR290W	BSD2	BSD2	U	0.389002	0.229106	0.654352	1.25653	-0.0619939	-0.53929
YBR291C	CTP1	CTP1	D	-2.4126		4.22332		-1.27403										1.5	0.585	1347	1404	1449	1219	1445	1248	1024
YBR292C	0	YBR292C	D	0.830527	0.490938	0.161881	0.468485	-0.519111	0.308969
YBR292C	0	YBR292C	U	0.269215	2.23919	1.95534	1.18238	0.0182641	1.28974
YBR293W	VBA2	VBA2	D	0.501833	-1.18372	0.243001	0.0968021	0.187347	-0.130906
YBR293W	VBA2	VBA2	U	-0.736008	0.71625	-0.0431936	0.0246133	0.761734	0.120637
YBR293W	VBA2	VBA2	U	0.352271	-0.112386	0.16615	-0.169729	0.542917	-0.286107
YBR294W	SUL1	SUL1	D	-0.284305	1.02787	-0.678401	0.775547	0.47921	-0.704282
YBR294W	SUL1	SUL1	U	-0.0238194	-0.812446	0.303643	-0.189624	0.150202	1.18724
YBR295W	PCA1	PCA1	U	1.88693		2.70851		0.993171
YBR295W	PCA1	PCA1	D	1.51391	1.41875	0.766059	2.91025	0.715224	0.640263
YBR296C	PHO89	PHO89	D	1.77646		2.08144		1.64189
YBR296C	PHO89	PHO89	U	1.32079	2.69518	2.87481	3.11895	1.97498	2.07184
YBR297W	MAL33	MAL33	D	1.03905		-0.123351	1.60766	0.526391
YBR297W	MAL33	MAL33	U	0.257993	0.153394	1.26075		0.860225	1.38597
YBR299W	MAL32	MAL32	D	-0.315627	0.0763336	-0.188991	0.410192	-0.682671	-0.139259
YBR300C	0	YBR300C	U	-0.439477		2.21908	1.48301	0.0261668
YBR300C	0	YBR300C	D	2.40264	2.08473	2.44341	1.72096	1.58034	-0.260347
YBR301W	DAN3	DAN3	D	0.0901761	0.367076	-0.280625	-0.346006	0.406492	-0.376062
YBR301W	DAN3	DAN3	U	0.589781	-0.234255	0.218302	-0.175179	0.379669	-0.0573979
YCL001W	RER1	RER1	D	-0.837564	0.378018	-0.863503	-1.89347	-2.47193	-1.65529
YCL001W	RER1	RER1	U	0.362201	0.197788	0.582632	-1.18077	-1.09801	-2.69824
YCL002C	0	YCL002C	D	0.129281	0.573401	0.262073	0.0343448	-0.480065	-0.385739
YCL005W	LDB16	LDB16	U	0.0430304		-0.203585		-0.583316	-2.08956
YCL006C	0	YCL006C	D	-0.533848	-0.884489	0.157013	0.354802	-0.406684	0.338184
YCL006C	0	YCL006C	U	0.332649	0.441557	0.387408	-0.34554	0.705091	-0.334467
YCL008C	STP22	STP22	D	1.08331	0.6185	0.926686	-0.33652	-0.770849	-1.95347
YCL009C	ILV6	ILV6	D	0.431922	0.649584	-0.0170909	-1.0289	0.737269	-0.193619
YCL009C	ILV6	ILV6	U	0.229626	-0.159764	-0.0456471	-0.516303	1.31477	0.0697196
YCL011C	GBP2	GBP2	D	-0.598545		-1.21047	-0.768333	0.502415
YCL012W	0	YCL012W	D	0.281123	1.21759	0.641957	-0.400897	0.276805	-0.799972
YCL012W	0	YCL012W	U	-0.0242501	-0.252226	0.0785612	-1.53375	0.315655	-0.0647976
YCL013W	0	YCL013W	D	0.436447	-1.70246	-0.20793	-0.272741	0.551682	0.535013
YCL013W	0	YCL013W	U	0.101206	-0.160163	1.05472	-0.979882	0.51596	-0.514227
YCL014W	BUD3	BUD3	U	0.465247		1.36912	-1.2156	0.99793
YCL014W	BUD3	BUD3	D	-0.801227	0.246064	-1.1294	0.196499	-0.888331	-0.364435
YCL022C	0	YCL022C	D	-0.438032	-0.288812	0.0911781	0.234848	0.374038	-0.177733
YCL022C	0	YCL022C	U	2.14079	1.23287	1.88715	-0.469469	1.97409	-0.214521
YCL022C	0	YCL022C	U	0.116885	-0.104315	-0.37192	0.189353	0.709767	-0.0519511
YCL023C	0	YCL023C	D	0.435903	0.225459	-0.0145915	-0.222528	0.255745	-0.704948
YCL023C	0	YCL023C	U	1.48493	0.597097	1.55394	-0.208329	1.32642	-0.123972
YCL024W	KCC4	KCC4	D	0.74482	-0.415098	-0.414883	-0.026005	0.498568	0.146181
YCL024W	KCC4	KCC4	U	0.109605	-1.00185	1.45616	-0.815867	-0.822678	-0.197616
YCL025C	AGP1	AGP1	D	0.453434	0.543694	0.0576816	0.319663	0.962298	-0.00269321
YCL026C	0	YCL026C	D	0.0641866	0.183306	1.36248	0.154341	0.491583	0.436891
YCL026C-A	FRM2	FRM2	D	-0.0479594	-0.323143	0.433341	0.633038	-0.261979	-0.718533
YCL026C-A	FRM2	FRM2	U	0.687422	-0.234248	0.348789	-0.0736381	0.844493	0.864686
YCL027W	FUS1	FUS1	U	0.811202		0.562439		0.315506	-0.992535
YCL027W	FUS1	FUS1	D	0.630064	0.764379	-0.201474	-1.15787	0.64492	-0.470179
YCL028W	RNQ1	RNQ1	U	0.320588		0.452152	-1.37487	0.268968
YCL028W	RNQ1	RNQ1	D	-0.608674	0.179651	-0.306236	0.254478	-0.277504	-0.225233
YCL030C	HIS4	HIS4	D	-0.261566	-0.0667665	0.615901	-0.414759	0.36989	-0.674656
YCL030C	HIS4	HIS4	U	-0.931181	0.28001	-1.31094	-4.06062	-0.113091	-1.33162
YCL032W	STE50	STE50	D	-0.412631	0.155606	-0.721504	-0.739881	-0.319933	-0.933306
YCL033C	0	YCL033C	D	-0.237034	1.09673	0.98985	-1.54098	0.652512	-0.341023
YCL034W	LSB5	LSB5	D	-0.810259	-1.04462	-2.10068	-1.00849	-0.249684	0.176068
YCL035C	GRX1	GRX1	D	-0.613717	-0.318628	-0.719965	-0.245349	-0.23257	0.434755
YCL035C	GRX1	GRX1	U	-0.477069	-0.0819151	-0.526622	0.297857	0.196435	0.145644
YCL036W	GFD2	GFD2	D	-1.25923	0.983249	0.848707	-1.08587	0.272277	0.378802
YCL038C	ATG22	ATG22	D	0.0635688	0.103492	-0.500576	-0.0458451	-0.350621	-0.585792
YCL038C	ATG22	ATG22	D	-0.0745644	-0.52288	-0.982211	-0.568819	-0.604777	-0.0738467
YCL038C	ATG22	ATG22	U	-1.90536	-0.801601	-2.52001	0.174615	-3.23124	-0.40969
YCL038C	ATG22	ATG22	U	0.507209	0.436846	0.727153	-0.14045	0.596675	-0.480545
YCL038C	ATG22	ATG22	U	2.89321	0.803456	2.46664	-0.0660231	2.47727	-0.639763
YCL039W	GID7	GID7	U	0.3402			-2.45873		-1.69892
YCL040W	GLK1	GLK1	D	0.796752	-0.30967	1.34232	-0.997775	0.588527	0.558383
YCL042W	0	YCL042W	D	0.59781		1.38029	-1.17207	-0.422067	-0.134088
YCL044C	MGR1	MGR1	D	-0.805978	-0.088104	-0.0819458	-0.762064	0.264391	-0.500112
YCL044C	MGR1	MGR1	U	-0.915573	-0.424734	-0.0514771	-1.3704	-0.354599	-0.231861
YCL045C	0	YCL045C	D	-1.29472	0.0449526	-0.575481	-1.04283	-1.01435	-1.26362
YCL046W	0	YCL046W	U	-0.457558		0.918164	-1.81401	-1.37365
YCL046W	0	YCL046W	D	-0.200995	0.256183	-0.176097	-1.42835	-0.875153	-0.578517
YCL047C	0	YCL047C	D	0.430027	-0.10468	0.47628	0.140375	0.251302	-0.588563
YCL048W	SPS22	SPS22	D	1.15623	2.06534	0.115909	0.416545	1.3561	0.134548
YCL048W	SPS22	SPS22	U	0.111626	1.78762	0.463451	-0.655971	0.127316	0.107023
YCL049C	0	YCL049C	D	-0.0265657	0.305455	-0.444812	-0.669208	-0.844188	-0.0817692
YCL049C	0	YCL049C	U	0.396059	-0.802161	0.345225	-0.37544	0.713052	-0.254159
YCL050C	APA1	APA1	U	0.137731	0.670046	1.01404	0.174974	-0.534214	0.724718
YCL051W	LRE1	LRE1	D	0.384599	0.0396629	-0.708192	-1.0748	-1.20575	-0.0845577
YCL051W	LRE1	LRE1	U	0.314959	-0.166698	0.385502	-0.000651469	-1.69116	-1.08217
YCL055W	KAR4	KAR4	D	-0.25286	-0.83382	0.425533	-0.283755	0.0829439	-0.0252654
YCL056C	0	YCL056C	D	0.0614939	-0.0457405	-0.892747	-1.01554	-0.0834546	0.400508
YCL056C	0	YCL056C	U	0.263965	-0.644805	-0.014939	-0.185682	0.680385	0.333775
YCL057W	PRD1	PRD1	D	-0.0503916	0.175263	0.0578204	-0.402161	0.12388	-0.504393
YCL057W	PRD1	PRD1	U	-0.251957	-0.404406	-0.809254	-0.591636	0.377526	0.0212894
YCL058C	FYV5	FYV5	D	-2.41226	-0.684601	-3.18692		-2.22947
YCL058C	FYV5	FYV5	U	3.31717	1.99031	3.12661		2.88877
YCL060C	0	YCL060C	U	-0.690208	-0.562921	0.51185	-1.12567	-0.130175	-0.156812
YCL061C	MRC1	MRC1	D	-0.931675	4.06829	2.54214			0.220358
YCL062W	0	YCL062W	D	-3.50323	1.22645			1.70168	0.771646
YCL064C	CHA1	CHA1	U	0.403035	1.29978	1.27518		1.8275	2.24496
YCL064C	CHA1	CHA1	D	-0.482376	-0.401244	0.129076	-0.44172	0.130204	-0.385551
YCL064C	CHA1	CHA1	U	0.261451	-1.06198	-0.00277042	-1.12245	0.166688	0.42546
YCL069W	VBA3	VBA3	D				-0.390027	1.49345	-0.165861
YCL069W	VBA3	VBA3	U	-0.286649	-3.24174	0.311649	-1.4286	-0.532134	0.207823
YCL074W	0	YCL074W	D	-1.49694	0.386725	-1.32846		0.349109
YCL074W	0	YCL074W	U	1.03986	0.738393	0.984057	0.167938	1.09252	0.164728
YCL075W	0	YCL075W	D	-0.0910693	0.198487	-0.730964	-0.324998	-0.0626998	-0.739555
YCL075W	0	YCL075W	U	-0.0997552	0.327832	-0.161114	0.0628375	0.328397	0.250387
YCL076W	0	YCL076W	D	-0.365541	-0.621799	-0.493486	0.22957	0.272771	-0.247506
YCL076W	0	YCL076W	U	0.315957	0.404774	0.550756	0.272727	0.327429	-0.517787
YCR001W	0	YCR001W	D	0.553223	-0.713451	-0.453255	-0.00429165	-0.165163	-0.390332
YCR001W	0	YCR001W	U	-0.293171	-0.860223	0.721635	-1.11455	0.713676	0.182736
YCR004C	YCP4	YCP4	D	-0.032741	-0.13254	-1.33391	-1.02392	0.293643	-0.569842
YCR004C	YCP4	YCP4	U	0.965802	-0.210135	0.361518	0.0640946	0.490725	-0.338977
YCR005C	CIT2	CIT2	D	1.18413	1.06318	0.716577	-0.0838324	0.721296	-0.500193
YCR005C	CIT2	CIT2	U	0.338083	-1.39025	0.11941	-0.458159	0.338337	-0.578814
YCR006C	0	YCR006C	D	-0.0611814	-0.737605	-0.632592		-0.298075	0.201045
YCR007C	0	YCR007C	D	-0.561933	-1.54952	-0.359498	-1.39321	-0.507425
YCR007C	0	YCR007C	U	1.71477	0.890251	1.79485	0.562304	1.19556	0.415699
YCR008W	SAT4	SAT4	D	-1.26439	-0.105851	-1.63588		-0.524126
YCR008W	SAT4	SAT4	U	0.0826159	-0.00102165	1.07185	-2.71099	1.31437
YCR010C	ADY2	ADY2	D	0.208657	0.698537	-0.268404	-0.398865	0.624627	0.232129
YCR010C	ADY2	ADY2	U	0.494967	0.659948	0.604039	0.211205	0.13033	0.124878
YCR011C	ADP1	ADP1	D	-0.0771518	0.881543	-1.06243	-0.230344	-0.0803647	-0.636741
YCR011C	ADP1	ADP1	U	1.0842	0.633895	-0.0756416	-0.531613	1.55069	-0.55716
YCR014C	POL4	POL4	D	0.370541	1.38913	0.251092	-0.5822	-0.32122	-0.934234
YCR015C	0	YCR015C	D	-1.07619	0.338791	-1.25461		0.348223	-0.134228
YCR015C	0	YCR015C	U	-0.105533	-0.161097	-1.35917	-0.809101	-0.573348	-0.0728795
YCR016W	0	YCR016W	D	-0.431005	0.459564	0.926538	-1.18144	0.0624353	-1.11139
YCR016W	0	YCR016W	U	-1.24856	-0.626516	-1.24712	-0.210539	-0.999488	-0.996544
YCR017C	CWH43	CWH43	D	-0.268156	1.19793	-0.745981	-2.22797	1.50639	-1.66893
YCR019W	MAK32	MAK32	D	0.579395	0.204761	0.445365		0.253277	-0.983349
YCR019W	MAK32	MAK32	U	-0.57652	-0.467201	-0.0844742	0.724491	0.14005	0.0821607
YCR020C	PET18	PET18	D	-0.559753	-1.08605	-0.0620813	-0.552978	-0.142084	-0.509704
YCR020C	PET18	PET18	U	-0.170283	0.252373	0.740206	-1.35401	0.397185	-0.977087
YCR020C-A	MAK31	MAK31	U	0.748262		0.249864		0.469731	-0.756754
YCR021C	HSP30	HSP30	D	-0.310816	0.113128	-0.0754525	-0.951167	0.329742	-0.308079
YCR021C	HSP30	HSP30	U	-0.213022	0.87588	-0.212216	-0.091749	0.391345	-0.326305
YCR022C	0	YCR022C	D	-0.112746	-0.662171	-0.228835	0.179169	0.316971	-0.857489
YCR023C	0	YCR023C	D	0.215983	0.690539	0.281151	-0.392149	0.541355	0.10875
YCR023C	0	YCR023C	U	-0.143821	0.353672	-0.230759	-0.440214	0.134616	-0.22178
YCR024C-A	PMP1	PMP1	U	1.48243	2.60081	1.07049		1.44656	0.898017
YCR024C-A	PMP1	PMP1	D	2.40154	0.351302	2.35805	-0.853785	0.618861	-0.129559
YCR025C	0	YCR025C	D	1.79838	0.464358	1.01367	0.273562	0.126104	0.523136
YCR025C	0	YCR025C	U	0.699278	0.310299	0.374569	0.456479	0.324103	0.879123
YCR027C	RHB1	RHB1	U	0.588018	2.69276	1.18213	2.40555	0.737936	0.0833404
YCR030C	SYP1	SYP1	D	0.0529312	-0.803254	0.716624	0.196947	0.550247	-0.834661
YCR030C	SYP1	SYP1	U	0.153505	0.572495	0.516054	0.122506	-0.215626	1.21815
YCR031C	RPS14A	RPS14A	D	0.209316	5.60947	4.00189		3.07897
YCR031C	RPS14A	RPS14A	U	0.135948	1.69952	0.15322	1.31649	1.85195
YCR032W	BPH1	BPH1	D	0.0829343	0.941246	-0.0514453	-0.468581	0.740333	0.319754
YCR032W	BPH1	BPH1	U	0.958141	0.229087	-0.45375	-0.149639	1.66393	1.76187
YCR033W	SNT1	SNT1	D	-0.695632	0.870641	-1.92967	-0.972102	-1.34477	-0.620516
YCR033W	SNT1	SNT1	U	-0.120811	-1.59944	-0.0884965	-0.228156	-0.138854	0.213381
YCR034W	FEN1	FEN1	D	2.87318	0.18519	2.54586	2.77398	0.121203	1.4942
YCR034W	FEN1	FEN1	U	1.2405	1.04141	2.10666	2.24476	0.294648	2.29264
YCR037C	PHO87	PHO87	D	-0.148185	0.442124	-0.383264	0.136045	-0.431559
YCR037C	PHO87	PHO87	U	0.279957	-0.526657	0.0862381	-0.0742597	-0.203944	-0.101636
YCR043C	0	YCR043C	D	0.121207	-2.95522	-1.19681	-0.177772	-0.485501	-0.854684
YCR043C	0	YCR043C	U	0.49411	-0.527988	0.15525	-0.0961278	-0.261346	-0.940444
YCR045C	0	YCR045C	U	0.940556		1.36996		0.101348
YCR045C	0	YCR045C	D	0.651495	0.0178675	0.493787		1.78068	-1.29766
YCR048W	ARE1	ARE1	D	-0.0151927	0.405325	0.787448	-0.557886	-0.204806	-0.434881
YCR048W	ARE1	ARE1	U	-3.66084	-4.02488	-4.00332	0.876517	-3.24427	0.787804
YCR048W	ARE1	ARE1	U	-4.28139	-2.88955	-4.25417	0.615203	-3.56997	-0.218204
YCR049C	0	YCR049C	D	2.3512		1.382		0.223499	0.937104
YCR049C	0	YCR049C	U	0.248133	-0.46689	0.132149	2.21507	0.218515	0.611096
YCR051W	0	YCR051W	U	-0.313593	0.57767	1.30102		-0.134076	1.13536
YCR059C	YIH1	YIH1	D	0.238033				0.954626	0.496922
YCR059C	YIH1	YIH1	U	0.97584	0.700788	1.08879	1.29796	0.195453	1.69061
YCR060W	TAH1	TAH1	D	0.508248	-0.58057	0.782614	0.230832	0.676101	-0.429655
YCR060W	TAH1	TAH1	U	0.0880099	-0.349047	0.555376	0.459221	1.52446	0.488009
YCR061W	0	YCR061W	D	1.40464	0.0882396	-0.112386		1.09888
YCR062W	0	YCR062W	D	3.15171		1.42811		0.97763	-0.342365
YCR065W	HCM1	HCM1	U	4.06163		2.26315			2.7853
YCR066W	RAD18	RAD18	D	1.09895	2.58219	1.26575		0.498929	1.51593
YCR066W	RAD18	RAD18	U	0.281895	-0.634468	0.356372		0.398978	0.246514
YCR067C	SED4	SED4	U	-0.110633	0.566158	0.139434		-0.381764	-0.358659
YCR067C	SED4	SED4	D	-0.153571	-0.130546	-0.174828	0.419559	-0.108776	0.128047
YCR069W	CPR4	CPR4	D	-0.153193	0.101617	0.5596	0.136701	0.355467	0.483446
YCR069W	CPR4	CPR4	U	0.393365	-0.68424	0.0639324	-0.0947063	0.363782	-0.124822
YCR073C	SSK22	SSK22	U	0.288423	-1.57541	1.29218		-0.157254	0.854576
YCR073C	SSK22	SSK22	D	-0.218869	-0.601664	-0.402681	0.250548	0.18099	-0.360239
YCR073C	SSK22	SSK22	U	1.34504	-0.771347	-0.0581936	-0.213282	-0.944186	-0.0815653
YCR073W-A	SOL2	SOL2	D	-0.810737	-0.401183	-0.422947	-0.297139	-0.681447	-0.352732
YCR073W-A	SOL2	SOL2	U	-1.91106	-0.527296	-0.303536	-1.70934	0.477652	-2.05307
YCR075C	ERS1	ERS1	D	0.319184	0.544624	0.758195	0.83577	0.313117	-0.650961
YCR075C	ERS1	ERS1	U	0.393711	1.21299	-0.0914358	-0.403381	0.765993	-0.424526
YCR076C	0	YCR076C	D	-0.071755	-0.622648	-0.693028	0.516359	-0.385767	0.0768959
YCR076C	0	YCR076C	U	0.558233	-0.111297	0.179583	-0.0674203	-0.124331	-0.651099
YCR079W	0	YCR079W	D	2.13506	0.121824	2.48116	2.18268	-0.797543
YCR079W	0	YCR079W	U	0.728859	1.93085	-0.538844		-1.07328	0.643064
YCR082W	AHC2	AHC2	U	1.50475	1.56024	0.211371		1.00425
YCR082W	AHC2	AHC2	D	0.167542	0.993072	0.301243	0.389706	-0.582884	-0.0207051
YCR083W	TRX3	TRX3	D	0.294706	0.864134	0.249841		-0.365462
YCR083W	TRX3	TRX3	D	2.07835	1.15065	0.538691	-0.193684	0.397337
YCR083W	TRX3	TRX3	U	0.240589	-0.0805221	-0.164058	0.240214	1.2462	-0.185393
YCR085W	0	YCR085W	D	0.614828	2.35937	1.26172	2.11488	0.579125	0.434081
YCR085W	0	YCR085W	U	0.834973	2.00022	2.56033	0.190033	2.09665	2.00531
YCR087C-A	0	YCR087C-A	U	0.927851	1.63774	0.528647
YCR087W	0	YCR087W	U	-1.07003	0.338458	-0.592977	-0.478412	2.26699	0.297333
YCR088W	ABP1	ABP1	D	-0.328495	-0.366412	-0.331445	-0.419369	-0.237097	0.00709763
YCR088W	ABP1	ABP1	U	0.235096	-0.835737	0.0154773	-0.117109	-0.267696	0.168329
YCR089W	FIG2	FIG2	U	-0.0970455	-0.507379	0.367395	0.0299693	0.207359
YCR089W	FIG2	FIG2	D	-0.327619	0.310873	0.270587	0.195469	-0.3768	-0.490049
YCR090C	0	YCR090C	D	-0.506238	-0.0481517	-0.266795	-0.199824	0.544987	0.342473
YCR090C	0	YCR090C	U	0.441056	0.717763	-0.204817	0.153999	-0.467998	0.142192
YCR091W	KIN82	KIN82	U	0.436099	0.865522	-1.4461	0.374779	-0.3624	0.06636
YCR092C	MSH3	MSH3	D	-0.543523	-1.28201	0.352571	-0.0648584	-0.832698	-0.251524
YCR092C	MSH3	MSH3	D	-0.415392	-0.836525	-0.250894	-0.288683	0.306548	0.565035
YCR092C	MSH3	MSH3	U	-0.271104	0.541942	-0.168514	-0.205947	-0.453702	-0.650168
YCR094W	CDC50	CDC50	D	1.45968	-3.19587	-2.6016	1.03091	0.434024	-1.88897
YCR094W	CDC50	CDC50	U	0.967119	-1.00133	-0.453644	2.1084	-1.09615	-0.0639587
YCR095C	OCA4	OCA4	D	-0.184265	-0.386071	0.676992	1.0434	0.268457	1.83641
YCR095C	OCA4	OCA4	D	-0.0922307	0.287223	0.61148	1.06484	0.457441	2.28247
YCR095C	OCA4	OCA4	U	-0.359068	-0.651495	0.625874	-0.516605	0.567665	0.0678098
YCR098C	GIT1	GIT1	D	2.15961	2.36902	-0.0910948	-0.887597	-0.357269	-0.517278
YCR098C	GIT1	GIT1	U	0.0623359	1.27284	0.541656	3.58438	0.681387	0.861754
YCR099C	0	YCR099C	D	-0.608332	0.00159587	0.389219	1.06937	-0.208424	0.189022
YCR099C	0	YCR099C	U	0.115032	0.315767	-0.325838	1.30635	-0.128778	0.535771
YCR100C	0	YCR100C	D	0.173839	-0.404337	0.45351	0.594233	0.483376
YCR100C	0	YCR100C	U	-0.135702	-0.350527	-0.287881	-0.731255	0.238803	-0.579768
YCR101C	0	YCR101C	D	-0.0318349	-1.54726	-0.0705039	0.453907	-1.15454	0.502128
YCR101C	0	YCR101C	U	0.155909	0.340407	0.0268043	0.61798	-0.0714144	0.0457254
YCR102C	0	YCR102C	D	0.0402165	0.382643	0.684095	1.9771	0.612013	1.19063
YCR102C	0	YCR102C	U	-0.689081	-0.630575	-0.238711	0.238045	-0.268662	0.132632
YCR102W-A	0	YCR102W-A	D	-0.306932	-0.137829	0.904	0.248702	0.232395	-0.140096
YCR102W-A	0	YCR102W-A	D	-0.821236	-0.0104845	0.608181	0.35397	0.169204	-0.165953
YCR102W-A	0	YCR102W-A	U	-0.449091	0.127349	-0.0805436	0.0704791	0.183107	0.336538
YCR105W	ADH7	ADH7	D	0.518697	1.14725	-0.0601383	0.684378	0.809399	-0.484349
YCR105W	ADH7	ADH7	U	-0.165687	0.726501	-0.693285	0.0979268	0.336589	0.049962
YCR106W	RDS1	RDS1	D	-0.4293	0.520824	0.522748	-0.241773	0.181816	-0.258204
YCR106W	RDS1	RDS1	U	-0.4418	0.512093	-0.175687	0.272193	-0.0013498	0.259177
YCR107W	AAD3	AAD3	D	-0.14766	0.590045	-0.849939	0.466454	0.387293	1.78509
YCR107W	AAD3	AAD3	D	-0.0981289	0.297119	-0.927942	0.978524	-0.0795988	0.857402
YCR107W	AAD3	AAD3	U	-2.03461	-2.14693	-2.0902	0.137754	-1.78454	0.160518
YDL002C	NHP10	NHP10	D	-0.196742	0.330685	-4.22435	-3.67131	-0.99739	-3.11275
YDL009C	0	YDL009C	D	-0.0406247	0.0561561	0.241584	0.200486	0.494707	-0.200467
YDL009C	0	YDL009C	U	-1.089	-0.432271	-0.426338	-0.760386	0.15859	0.0770175
YDL010W	0	YDL010W	U	0.0963899		-0.00337913	-1.11792	1.01326	0.85225
YDL010W	0	YDL010W	D	-0.68778	0.505702	0.878164	-1.6053e-06	-0.0817968	-0.111553
YDL011C	0	YDL011C	D	0.156945	2.04788	1.98289		1.28242	-0.130256
YDL011C	0	YDL011C	U	0.41914	-0.455641	-0.173201	0.24338	0.575152	0.185563
YDL012C	0	YDL012C	D	-0.395714	-1.71269	0.382754	-0.25627	0.644564	0.0593709
YDL012C	0	YDL012C	U	-0.397618	0.8833	0.0803141	-0.227015	0.240554	0.0235411
YDL018C	ERP3	ERP3	U	-0.783106		0.565903	-1.21673	0.0514762	0.0469871
YDL018C	ERP3	ERP3	D	-0.215975	0.490224	0.76902	-0.937475	1.2228	0.0436893
YDL020C	RPN4	RPN4	U	2.76903	2.41948	3.47493	-1.19791	0.940097	-0.691625
YDL021W	GPM2	GPM2	D	-0.239745	0.605538	-0.355912	-0.409598	0.20342	-0.301508
YDL021W	GPM2	GPM2	U	0.413488	-1.29034	-1.41752	0.586175	-0.778619	0.262171
YDL022W	GPD1	GPD1	D	2.56531		0.959294	-0.330845	-0.252536	-0.739162
YDL022W	GPD1	GPD1	U	-1.59707	0.691569	-0.978492	-1.89099	0.966784	-0.536583
YDL023C	0	YDL023C	U	-0.415413	-1.28925	0.497801		-1.91462	-2.03094
YDL023C	0	YDL023C	D	-0.259364	-0.402852	0.0921127	-1.82445	-2.47892	-1.34268
YDL023C	0	YDL023C	U	0.0262728	-1.62983	0.42864	0.407936	-2.32699	-0.884056
YDL024C	DIA3	DIA3	D	0.789701	0.278768	0.250369	0.0220022	-0.0205598	-0.359298
YDL024C	DIA3	DIA3	U	-0.00847621	0.203968	-1.241	-0.000522138	-0.426863	-0.622219
YDL025C	0	YDL025C	U	-0.793566	1.49455			0.318533	2.25304
YDL026W	0	YDL026W	D	0.143691	-0.525578	-0.0664272	-0.640801	0.28286	-0.920277
YDL026W	0	YDL026W	U	-0.783139	-0.794353	-0.133888	-0.725348	0.92797	0.236122
YDL027C	0	YDL027C	D	0.934659	-0.361153	0.787777	0.799073	1.07934	-0.467329
YDL027C	0	YDL027C	U	0.678946	0.412038	0.637867	-0.362133	0.729354	0.752687
YDL034W	0	YDL034W	D	-0.747291	0.744323	-0.547416	-1.08707	0.0184299	-1.04497
YDL034W	0	YDL034W	U	-0.583567	0.169564	-0.622512	-0.704021	-0.720617	-0.657473
YDL035C	GPR1	GPR1	D	-0.5858		1.66783	-0.512338	3.0616	-1.56055
YDL037C	BSC1	BSC1	D	2.29146		0.964131		-0.399563	0.455302
YDL046W	NPC2	NPC2	D	0.27694	1.1682	0.282606	-0.0899362	0.547463	-0.405406
YDL046W	NPC2	NPC2	U	-0.207266	-0.524219	0.305695	-0.447125	-1.14386	0.236605
YDL048C	STP4	STP4	U	1.13216		0.755787	-0.866795	-0.239409
YDL048C	STP4	STP4	D	0.637999	0.761132	0.187406	-2.14975	-0.909967	-0.739909
YDL049C	KNH1	KNH1	D	0.240092	0.617655	-1.00649	-0.766368	0.12182	-0.281875
YDL049C	KNH1	KNH1	U	0.0323823	0.00930533	-0.957311	-0.0181239	-0.239451	-0.54095
YDL050C	0	YDL050C	D	1.81359	0.546291	0.553335	0.674642	0.441873	-0.82984
YDL050C	0	YDL050C	U	-0.431182	0.951335	-0.502765	-2.04325	-1.59732	-0.482835
YDL051W	LHP1	LHP1	U	-1.06982		-1.18196	0.0533364	-0.686968	-0.350107
YDL051W	LHP1	LHP1	D	1.39818	1.91524	0.935084	0.463569	0.104592	-0.943859
YDL052C	SLC1	SLC1	D	-0.174948		3.05162	1.0366	1.61827	0.285597
YDL052C	SLC1	SLC1	U	-1.63019	2.81662	-0.69951	-1.81475	1.906	-0.439215
YDL054C	MCH1	MCH1	D	-0.0749197	0.151262	0.842597	-0.138536	-0.672138	-1.18349
YDL054C	MCH1	MCH1	U	-0.42135	0.407515	0.112286	0.203555	-0.181319	-0.899846
YDL059C	RAD59	RAD59	U	-0.258489		-0.219507	-0.420678	0.239931	-0.297068
YDL059C	RAD59	RAD59	D	-0.250461	1.86476	-0.226111	0.517568	-0.633239	-0.373638
YDL061C	RPS29B	RPS29B	D	-0.911779	0.897384	0.913908		1.74379	0.897007
YDL065C	PEX19	PEX19	D	1.92809	0.890532	0.518159	-0.997432	1.21015	0.964626
YDL066W	IDP1	IDP1	D	-0.198041	0.0771882	1.18618	-2.16767	-4.37677
YDL070W	BDF2	BDF2	D	0.383057	-0.265057	-0.262183	-1.54325	-0.744733	1.10983
YDL071C	IRC1	IRC1	U	0.323339		0.250916	-1.61025	1.03654
YDL071C	IRC1	IRC1	D	-1.43135	-0.636322	-0.14317	-1.15535	-0.763192	0.910793
YDL072C	YET3	YET3	D	-2.5347	-1.32074	-3.58626		-4.74309	-6.56981
YDL072C	YET3	YET3	U	-1.3441	-0.97816	-2.67095	-5.50524	-3.48382	-8.03398
YDL073W	0	YDL073W	D	-0.915309		1.98551		2.35205	0.277007
YDL076C	RXT3	RXT3	U				-2.31603	0.845095	0.61394
YDL076C	RXT3	RXT3	D	0.116468	4.51887	4.06491	-2.42726	0.872152	-0.0305797
YDL078C	MDH3	MDH3	D	-0.35257	-0.93618	-0.183788	-0.665285	0.383462	-0.0886547
YDL078C	MDH3	MDH3	U	0.988686	0.514369	1.23291	-1.5746	0.566378	-0.255317
YDL079C	MRK1	MRK1	D	-1.13347	-1.10631	0.262882		0.256923	0.324602
YDL079C	MRK1	MRK1	U	-0.815299	0.504789	-0.71837	-1.52134	-0.595002	-0.36294
YDL080C	THI3	THI3	D	2.42	1.44603	3.36549	-0.0477004	1.3225	-0.95427
YDL085W	NDE2	NDE2	D	0.271959	0.394451	0.818396	-0.151721	0.102573	-0.0791651
YDL085W	NDE2	NDE2	U	-0.556797	0.285151	-0.102756	-1.63242	-0.330906	-0.226859
YDL086W	0	YDL086W	D	0.616928	2.08974	2.17457	-0.827542	0.393556	-0.332461
YDL086W	0	YDL086W	U	0.690574	0.722997	-0.303806	0.238377	0.235286	-0.588409
YDL088C	ASM4	ASM4	D	1.63539	2.45953	1.87758	-0.478859	2.21005	-0.573545
YDL089W	0	YDL089W	U	-0.19189		-0.00650413		-1.0383
YDL089W	0	YDL089W	D	1.34218	1.07392	0.477201	0.111553	-1.03638	0.379279
YDL091C	UBX3	UBX3	D	0.3906	0.640641	-0.816615	-0.559513	-0.0178428	-0.219204
YDL091C	UBX3	UBX3	U	-1.05412	0.159762	0.0159818	0.286143	0.230905	1.05816
YDL093W	PMT5	PMT5	D	-1.63982	2.28992	0.371224	-1.36984	0.562991	-0.604513
YDL093W	PMT5	PMT5	U	-0.0403214	1.00446	-0.29776	0.387268	0.0510536	-0.59485
YDL094C	0	YDL094C	D	0.402902	0.149806	1.10127	-0.995837	0.047564	0.159504
YDL094C	0	YDL094C	U	1.57997	1.44517	1.23246	-0.365699	0.593933	0.357387
YDL095W	PMT1	PMT1	D	-1.18435	-0.946561	-0.489498	-0.00567547	0.171337	-2.06705
YDL096C	OPI6	OPI6	D	1.33553	-0.580719	0.650481	-0.393842	0.984452	-0.796641
YDL096C	OPI6	OPI6	U	1.22831	0.492588	0.0596915	0.123674	-0.0501228	1.01851
YDL099W	BUG1	BUG1	D	0.568812	-0.567719	0.165091	0.764012	-0.105349	0.527597
YDL099W	BUG1	BUG1	U	1.07027	0.124966	0.233353	1.01356	-0.306908	0.205213
YDL100C	GET3	GET3	D	-3.43506	0.860341	-0.423185	-1.8053	-1.88906	-0.121581
YDL109C	0	YDL109C	D	-0.139404	-0.778265	-0.0482702	0.126552	0.968721	0.682236
YDL109C	0	YDL109C	U	-0.119092	-0.469199	-0.0968918	0.179882	0.35677	0.255782
YDL110C	TMA17	TMA17	D	-0.297374	0.800281	0.617921	0.151606	0.0507348	-0.626506
YDL110C	TMA17	TMA17	U	-0.194916	-0.197169	0.301119	0.131526	0.358143	0.40221
YDL112W	TRM3	TRM3	D	0.371222	-0.203328	0.800385	0.484393	0.312697	-0.55385
YDL112W	TRM3	TRM3	U	0.86305	0.688215	0.0307512	0.011461	0.762479	-0.790634
YDL113C	ATG20	ATG20	D	-0.817992	-1.26271	-0.0346703	-0.394301	0.433724	-0.184907
YDL114W	0	YDL114W	D	0.194169	0.211162	0.147687	-0.04005	-0.139312	-0.309945
YDL114W	0	YDL114W	U	0.446914	0.217196	0.2617	-0.332913	0.451499	-0.523712
YDL121C	0	YDL121C	D	0.0836616	0.0206304	-1.09109	-0.73716	0.170817	0.441639
YDL121C	0	YDL121C	U	0.859351	0.802899	0.527108	-1.1465	-0.138703	-0.151329
YDL122W	UBP1	UBP1	U	0.240185	0.39831	-0.504974		-1.27138	-5.53196
YDL122W	UBP1	UBP1	D	-0.850704	0.109252	-1.22179	-2.0889	-2.31816	-2.31884
YDL123W	SNA4	SNA4	U			0.121455	-0.881962	0.538202
YDL124W	0	YDL124W	D	-0.439707	-0.210807	-0.218288	0.0166274	-0.564259	0.448158
YDL124W	0	YDL124W	U	-0.234462	-0.517588	0.331219	-0.92799	0.0742159	-0.881971
YDL125C	HNT1	HNT1	D	-0.276001	0.528462	0.454709	-0.439438	0.488485	0.0483119
YDL127W	PCL2	PCL2	D	-0.532795	0.127786	-0.571246	-0.224713	0.134462	-0.226601
YDL127W	PCL2	PCL2	U	-0.277849	-0.603919	-0.513633	-0.556286	0.0653508	0.435105
YDL128W	VCX1	VCX1	D	0.17492	-0.0780972	0.00372481	-0.603941	-0.161831	-0.431959
YDL129W	0	YDL129W	D	-0.591434	-0.578454	-0.170642	0.187189	0.437887	-0.253434
YDL129W	0	YDL129W	U	-0.206826	0.467319	0.576237	-0.56478	0.171982	0.149845
YDL130W-A	STF1	STF1	D	0.50154	0.313712	-0.410302	-0.408162	0.457687	-0.120165
YDL130W-A	STF1	STF1	U	0.0759235	-0.798074	-0.954288	-0.510802	-0.164495	0.165875
YDL131W	LYS21	LYS21	D	-0.317928	-0.121389	-0.386862	-0.401572	-0.51523	-0.112102
YDL131W	LYS21	LYS21	U	0.367635	-1.57115	-0.388246	-0.705666	0.56677	-0.0942052
YDL133C-A	RPL41B	RPL41B	D	0.211906	-0.488198	0.101314	0.422019	-0.591307	0.461117
YDL133C-A	RPL41B	RPL41B	U	0.29043	-0.728156	0.344905	0.262771	0.484702	0.093246
YDL133W	0	YDL133W	D	-0.6243	-2.29377	-0.69241	-0.72388	-0.398613	-0.212248
YDL134C	PPH21	PPH21	U	-0.204052	-0.363269	-0.606449		0.524353	-2.32471
YDL134C	PPH21	PPH21	D	-0.00246541	-0.57994	0.0707879	-0.448188	-0.0149437	-1.27666
YDL134C-A	0	YDL134C-A	U	-0.0898099	-1.30146	0.00220015		0.0378629	-0.361195
YDL134C-A	0	YDL134C-A	D	-0.14603	0.113426	0.0300999	-0.619214	0.0864945	-0.773372
YDL135C	RDI1	RDI1	D	-0.73309	-0.256949	0.0838143	0.17781	0.494405	-0.171196
YDL135C	RDI1	RDI1	U	-0.271932	-0.27959	-0.035416	-0.186444	0.601863	0.799899
YDL136W	RPL35B	RPL35B	D	-1.34227	3.56769		-0.928227	0.855932
YDL137W	ARF2	ARF2	D	-0.356206	-0.671005	-0.941321	-0.600673	-0.429306	0.700864
YDL137W	ARF2	ARF2	U	0.0713541	0.822544	0.146085	-0.875108	0.556834	-0.50623
YDL138W	RGT2	RGT2	D	0.707837	0.993486	0.885233	0.577489	0.542906	0.144122
YDL138W	RGT2	RGT2	U	0.78504	0.655356	0.460295	-0.495287	0.650626	-0.0156123
YDL142C	CRD1	CRD1	D	1.87336	0.73621	2.14402	1.10529	0.969552	0.0330486
YDL142C	CRD1	CRD1	U	0.546109	-1.46253	1.88409	1.5653	1.41327	-0.0986347
YDL144C	0	YDL144C	D	0.867912	-0.0829412	0.646766	-0.139521	-0.0701277	0.249163
YDL146W	LDB17	LDB17	D	-0.150068	-1.40223	-0.307149	-0.315707	-1.72191	-0.519431
YDL146W	LDB17	LDB17	D	0.687557	-0.862484	0.340147	-0.469019	-1.25445	-1.02068
YDL149W	ATG9	ATG9	D	-0.618878	-1.24161	-2.09813	-4.35479	-4.15643	-4.56239
YDL149W	ATG9	ATG9	U	0.0610627	-0.7468	-2.1589	-4.43993	-3.66037	-5.70603
YDL154W	MSH5	MSH5	D	0.114454	0.359256	0.767184	0.179705	0.219157	0.106814
YDL154W	MSH5	MSH5	U	0.333314	0.0916135	0.527978	0.16013	0.408971	0.00295997
YDL155W	CLB3	CLB3	D	-0.49057	-0.170403	-0.159415	-0.120164	0.263895	0.315375
YDL155W	CLB3	CLB3	U	0.481378	0.99918	0.799579	-0.166873	0.954018	0.108918
YDL156W	0	YDL156W	D	0.185669	-0.127722	-0.252557	-0.669041	0.0108602	0.0503979
YDL156W	0	YDL156W	U	0.506702	0.316285	0.766931	0.0790244	0.731248	0.365098
YDL157C	0	YDL157C	D	0.241709	-0.670731	0.326826	0.164619	0.750903	-0.0125916
YDL161W	ENT1	ENT1	D	-0.309799	-0.602556	-0.236364	0.316435	0.34104	-0.0731874
YDL161W	ENT1	ENT1	U	0.812657	0.865379	0.934683	0.723412	0.680518	0.419871
YDL162C	0	YDL162C	D	0.381398	0.22908	-0.109804	-0.540612	-0.0494754	-0.270517
YDL162C	0	YDL162C	D	0.179694	-1.13982	-0.587313	-2.25196	-0.946251	-0.828601
YDL162C	0	YDL162C	U	0.0964969	-0.162108	-0.281164	-2.16281	0.536601	0.230761
YDL167C	NRP1	NRP1	D	0.119851	-0.154271	0.677997	0.0824446	-0.0502889	0.406739
YDL167C	NRP1	NRP1	U	0.597158	0.806394	1.45492	-0.0801752	1.40924	0.744836
YDL168W	SFA1	SFA1	D	-0.658945	-0.0567333	0.270891	-0.496412	0.314558	0.472476
YDL168W	SFA1	SFA1	U	0.223986	0.0754882	-0.229511	-0.680158	-0.282176	-0.22389
YDL169C	UGX2	UGX2	D	0.506796	0.657851	0.717145	-0.446793	0.94357	-0.00321439
YDL169C	UGX2	UGX2	U	0.516592	0.012326	0.369993	-0.492515	0.427459	-0.0879781
YDL170W	UGA3	UGA3	D	-0.00897422	-0.159326	-0.214406	0.110398	-0.174005	-0.101302
YDL170W	UGA3	UGA3	U	0.0569314	-0.568527	0.437396	-0.416171	0.813206	-0.14761
YDL171C	GLT1	GLT1	D	-0.791099	-0.687141	-0.155627	-0.497572	-0.385897	-0.241353
YDL171C	GLT1	GLT1	U	0.183467	-0.19994	0.347538	-1.17066	0.500932	-1.26279
YDL173W	0	YDL173W	D	-8.60172		-5.28498	-2.07808	0.885183	2.44805
YDL173W	0	YDL173W	U	-0.427133	-0.490943	-0.539678	1.06843	1.70286	3.04155
YDL174C	DLD1	DLD1	D	0.0831355	-0.463617	-0.0961253	-0.517335	0.0798528	0.541073
YDL174C	DLD1	DLD1	U	0.483229	0.16067	0.479293	-0.012208	0.587933	-0.153381
YDL175C	AIR2	AIR2	D	-0.983637	0.288543	-0.119412	-0.736793	0.588993	0.0156968
YDL176W	0	YDL176W	D	-0.619674	-0.0375795	-0.0695396	-0.22363	0.636942	0.0360632
YDL177C	0	YDL177C	D	-0.264565	0.490322	0.509521	-1.7508	0.532321	0.627237
YDL177C	0	YDL177C	U	-0.0292743	-0.23815	0.0359467	-0.154438	0.139728	-0.567986
YDL178W	DLD2	DLD2	D	-0.459149	0.105793	0.262654	-0.665931	-0.022217	0.625146
YDL178W	DLD2	DLD2	U	-0.0997714	0.0666316	-0.0724075	-0.402964	-0.0173707	-0.553605
YDL179W	PCL9	PCL9	D	0.0519101	-0.593974	-0.435699	-0.680922	0.00688814	1.6024
YDL180W	0	YDL180W	D	-0.280808	-0.232593	-0.389298	-0.606434	-0.186959	0.0111907
YDL180W	0	YDL180W	U	-0.423886	-0.941213	-0.14536	-0.569962	0.178451	-0.612909
YDL182W	LYS20	LYS20	D	-0.44902	-0.0687414	-0.547393	-0.578389	-0.617583	0.658098
YDL182W	LYS20	LYS20	U	0.107941	0.571702	0.33229	-0.178865	0.183146	-0.308192
YDL183C	0	YDL183C	D	0.864461	-0.424231	-0.267532		-0.378103	2.08502
YDL183C	0	YDL183C	U	0.353591	0.51645	0.611831	-0.095408	-0.715073	-0.350945
YDL184C	RPL41A	RPL41A	D	-0.330476	-0.0947819	-0.270146	0.182852	-0.148378	1.23997
YDL184C	RPL41A	RPL41A	U	-0.789869	-0.105238	0.00554099	-0.140205	-0.0544798	-0.437012
YDL186W	0	YDL186W	D	-0.493364	-0.513531	-0.156922	-0.18657	-0.0550914	0.0912895
YDL186W	0	YDL186W	U	0.408383	0.577344	0.745431	-0.268735	0.769972	-0.179594
YDL187C	0	YDL187C	D	-0.220078	0.15751	-0.190491	-0.463497	0.0922336	-0.0388016
YDL187C	0	YDL187C	U	0.0364338	-0.0680866	-0.323669	-0.739003	0.224084	-0.220636
YDL188C	PPH22	PPH22	D	0.474583	0.330814	1.05464	0.288947	0.236481	0.922181
YDL188C	PPH22	PPH22	U	-0.198641	0.12757	0.0157583	-0.308657	0.538724	-0.454376
YDL189W	RBS1	RBS1	D	-0.000867383	-0.440539		-0.955021	-0.518905	-0.951244
YDL189W	RBS1	RBS1	U	0.751837	0.364153	0.552872		0.387463	-0.365597
YDL190C	UFD2	UFD2	D	0.213812	-0.322006	-1.17423	-0.892633	-0.407031	-0.339416
YDL190C	UFD2	UFD2	U	-0.354085	-0.934913	-1.11846	-1.3348	-0.700628	-1.58127
YDL194W	SNF3	SNF3	U	0.780666	-1.32579	0.947054	-1.36456	-0.452428
YDL197C	ASF2	ASF2	D	-0.133764	-0.0722903	-0.641235	-0.47865	-0.476292	-0.491649
YDL197C	ASF2	ASF2	U	0.341991	-0.428218	0.14159	0.0512921	0.622392	-0.652566
YDL199C	0	YDL199C	D		0.368077	-1.62462			0.388329
YDL199C	0	YDL199C	U	0.845267	-0.579524	0.0846157		0.169387	-0.944735
YDL199C	0	YDL199C	D	0.324991	-0.475366	-0.0824815	-0.115931	0.148175	-0.354605
YDL200C	MGT1	MGT1	U	-2.14354				-1.00021	0.6179
YDL200C	MGT1	MGT1	D	0.381677	0.276122	0.606624	-0.368632	0.274253	-0.25876
YDL201W	TRM8	TRM8	D	-0.319297	0.31425	-0.0918783	-0.339542	-0.102629	-0.697999
YDL201W	TRM8	TRM8	U	0.830711	0.790867	0.49983	-0.0745289	0.844004	-0.152642
YDL203C	ACK1	ACK1	U	0.387698		0.174056	-0.343446	1.19675	-1.41829
YDL204W	RTN2	RTN2	D	0.361687	0.212218	0.255434	-0.0454316	-0.287796	-0.0818195
YDL204W	RTN2	RTN2	U	0.906143	-0.951483	0.122828	-0.163117	0.194177	-0.566233
YDL206W	0	YDL206W	D	-0.0987769	-1.21166	0.00644045	-0.197106	-0.280411	-0.503087
YDL206W	0	YDL206W	U	0.033343	-0.367306	-0.202022	-0.52773	0.880217	-0.186692
YDL210W	UGA4	UGA4	D	-0.155638	-0.465761	0.178896	-0.239706	0.307301	0.0470111
YDL210W	UGA4	UGA4	U	-0.678057	-0.0101331	0.415473	-0.447029	0.11296	1.31931
YDL211C	0	YDL211C	D	0.0396843	0.821671	1.03109	0.493482	0.645995	-0.288711
YDL211C	0	YDL211C	U	-0.239927	-0.266811	0.300481	-0.330393	0.640747	-0.185479
YDL213C	NOP6	NOP6	U				0.265835	0.614351	-0.169473
YDL213C	NOP6	NOP6	D	-0.172656	-0.209293	-0.798264		-0.733565	0.0477277
YDL214C	PRR2	PRR2	D	0.0624612	0.232493	0.945178	-0.35494	0.144768	-0.62462
YDL215C	GDH2	GDH2	D	0.0686713	-0.363781	0.142374	-0.657198	-0.421865	-0.120266
YDL215C	GDH2	GDH2	U	-0.0832223	-0.203204	0.233715	-0.139674	0.837724	0.00355487
YDL216C	RRI1	RRI1	D	-0.468379	-0.827974	-0.528344	-0.326718	0.263673	-0.215273
YDL218W	0	YDL218W	D	0.299609	-0.838254	-0.0674366	-0.447301	0.350549	-0.124551
YDL218W	0	YDL218W	U	0.343602	0.183956	0.0550583	-0.739873	1.10981	0.0225463
YDL219W	DTD1	DTD1	D	0.405375	0.18262	-0.0635003	-0.372278	-0.183556	-0.60522
YDL219W	DTD1	DTD1	U	0.398942	0.330508	0.809187	-0.421917	0.389782	0.138842
YDL222C	FMP45	FMP45	D	0.537662	-0.198588	0.668428	-0.298517	0.230941	-0.31042
YDL222C	FMP45	FMP45	U	1.18464	-0.393379	0.820969	0.0217743	0.531121	0.42812
YDL223C	HBT1	HBT1	D	-1.24468		-1.61867	1.55193	-0.0708861	3.9505
YDL223C	HBT1	HBT1	U	0.567716	0.0776492	0.846845		0.239647	0.396212
YDL224C	WHI4	WHI4	D	0.122679	0.108565	-0.150534	0.117836	0.458713	0.190205
YDL224C	WHI4	WHI4	U	0.588831	0.422932	0.745299	-0.369526	0.663615	0.0766425
YDL225W	SHS1	SHS1	U	-0.49615		-1.20195		0.371825	-0.13669
YDL225W	SHS1	SHS1	D	-0.343086	-0.618751	-0.179991	-0.845908	-1.04317	-0.611217
YDL227C	HO	HO	D	-0.0100947	-0.0490937	-0.190988	-0.44151	0.176553	-0.285246
YDL227C	HO	HO	D	0.52885	-0.759898	-0.637174	-0.00827175	0.131367	1.01639
YDL227C	HO	HO	U	0.00206012	-0.0667848	-0.0230782	-0.672439	0.451602	-0.903625
YDL229W	SSB1	SSB1	D	0.253093	-0.222249	-0.0471908	-0.244767	-0.153237	-0.0149862
YDL229W	SSB1	SSB1	U	-2.14604	-1.34852	-1.25854	-2.66021	-1.09365	-1.68606
YDL230W	PTP1	PTP1	U	0.841592	-0.261574	1.07538		1.03891	1.18742
YDL230W	PTP1	PTP1	D	0.0178283	0.0336675	0.626774	-0.32431	0.450713	-0.17241
YDL231C	BRE4	BRE4	D	-0.284756	-0.46153	-0.994528	-0.636223	-1.3062	0.417858
YDL231C	BRE4	BRE4	U	-0.264563	0.0245733	-0.405114	-0.198491	0.399474	0.411994
YDL233W	0	YDL233W	D	0.765872	0.275983	0.451776	0.187655	0.523267	0.0352229
YDL233W	0	YDL233W	U	0.389303	0.177595	-0.00150719	-0.378528	0.131997	-0.150912
YDL234C	GYP7	GYP7	U	-0.345379		0.251203		-0.638375
YDL234C	GYP7	GYP7	D	0.070293	-0.24822	-0.858723	-0.506528	-0.21095	-1.14843
YDL234C	GYP7	GYP7	U	-0.563379	-0.784212	-0.424086	-0.636269	-0.00794764	-0.0587207
YDL236W	PHO13	PHO13	D	1.18104	0.173086	0.799988	-0.635799	1.03294	0.704252
YDL236W	PHO13	PHO13	U	1.39817	0.403525	1.00896	0.84926	1.07881	1.33144
YDL236W	PHO13	PHO13	U	1.43898	0.406124	1.53724	1.10776	0.724587	1.51327
YDL237W	0	YDL237W	U	-0.687546	-0.4235	-0.190738		0.539173	-0.31891
YDL237W	0	YDL237W	D	0.187678	-0.405193	0.151477	-1.74011	0.497469	-0.399974
YDL238C	GUD1	GUD1	D	0.399813	-0.522699	-0.297171	-1.01201	0.852165	0.475034
YDL238C	GUD1	GUD1	U	-0.0403613	-0.398782	-0.726266	-0.898655	-0.326178	0.155966
YDL239C	ADY3	ADY3	D	0.222351	-0.518331	-0.0548227	0.52797	0.317116	0.542595
YDL239C	ADY3	ADY3	U	-0.672272	-0.504635	-1.07964	0.10452	-0.404453	0.221827
YDL240W	LRG1	LRG1	D	0.200968	-0.0245625	0.750273	-0.253812	0.0361999	-0.1975
YDL240W	LRG1	LRG1	U	-0.0972109	-0.324497	1.08648	0.0370236	0.655181	0.180588
YDL241W	0	YDL241W	D	-0.456299	-0.0631012	-0.863041	-0.278421	0.477672	0.124825
YDL241W	0	YDL241W	U	-0.541469	-0.239696	-0.484155	0.013849	-0.113097	0.0171562
YDL242W	0	YDL242W	D	0.575127	-0.151855	0.603362	0.0307378	0.628364	0.235016
YDL242W	0	YDL242W	U	-0.0508192	0.0209614	-0.24919	-0.109218	0.166582	0.130173
YDL243C	AAD4	AAD4	U	0.0927095	-0.132483	-0.153401		-0.0847411	-0.0628807
YDL243C	AAD4	AAD4	D	0.267315	-0.969474	-0.574303	-0.105448	-0.131833	-0.437581
YDR001C	NTH1	NTH1	D	0.471578	-0.914193	-1.11203	-0.715745	-1.08961	-1.96224
YDR001C	NTH1	NTH1	U	-0.0662097	0.0996772	-1.1102	-1.48256	-0.845245	-1.36047
YDR003W	RCR2	RCR2	D	1.20724	0.920793	-0.158013	-0.0208658	0.988794	-0.857686
YDR003W	RCR2	RCR2	U	-0.336136	0.00265854	-0.326435	-1.13054	0.0755357	-0.923735
YDR004W	RAD57	RAD57	U	-1.22692		-0.223564	-0.726072	1.01045	-0.229347
YDR005C	MAF1	MAF1	D	-0.821984	-0.816395	-2.89908	-2.17487	-1.24949	-1.59848
YDR005C	MAF1	MAF1	U	-1.18044	-0.336444	-1.80427	-4.08519	-3.09289	-4.09093
YDR006C	SOK1	SOK1	U	0.21032	-0.0409269	-0.661826	-1.18619	0.648894	-1.74062
YDR007W	TRP1	TRP1	D	0.176705	-0.0338473	2.26847	0.494786	1.53356	0.571463
YDR007W	TRP1	TRP1	U	0.634886	1.48573	1.1156	0.737767	2.7894	0.348878
YDR008C	0	YDR008C	D	1.17659	1.68827	1.34757	-0.291975	1.37881	1.46716
YDR009W	GAL3	GAL3	D	0.205939	0.189596	0.56613	0.101882	-0.181681	-0.46709
YDR009W	GAL3	GAL3	U	1.08589	0.700111	0.859802	-0.327692	0.601319	0.328023
YDR010C	0	YDR010C	D	-0.56091	0.227836	0.393379	-0.32409	0.259809	-0.000907645
YDR010C	0	YDR010C	U	-0.0181233	-1.26193	-0.101393	-0.182133	0.0175813	-0.229058
YDR011W	SNQ2	SNQ2	U	0.161638	-0.263852	-0.235937	0.755149	-0.471822	0.0499171
YDR014W	RAD61	RAD61	D	-2.21661		-1.85721	-0.167033	-0.0416432
YDR014W	RAD61	RAD61	U	-0.450126	-0.41941	0.886805		-0.123034	-0.0557221
YDR015C	0	YDR015C	D	0.0713933	-0.10648	-0.377391	-0.523867	0.375934	0.0720125
YDR015C	0	YDR015C	U	0.0348459	0.726869	1.09181	-0.110879	0.558398	0.200979
YDR018C	0	YDR018C	D	-0.784239	-0.086346	-0.725852	-0.818569	-0.938978	-1.04921
YDR018C	0	YDR018C	U	0.370113	0.161951	0.474104	-0.915496	0.337107	-0.692139
YDR019C	GCV1	GCV1	D	-0.638507	0.499643	-0.680682	-0.918095	0.369043	-0.00511182
YDR019C	GCV1	GCV1	U	0.397289	0.429997	-0.28465	-0.275104	0.292471	-0.202771
YDR020C	0	YDR020C	U	0.530689	0.573147	1.60322		0.675255
YDR020C	0	YDR020C	D	1.06077	0.494156	1.25501	0.111834	0.358699	-0.129262
YDR022C	CIS1	CIS1	D	-0.412009	-0.777451	-1.37762	-2.58988	-2.41404	-1.64127
YDR022C	CIS1	CIS1	U	0.316507	-0.861097	-0.523083	-4.14163	-1.98544	-3.31564
YDR025W	RPS11A	RPS11A	D	-0.757179	0.665247	-0.638165		-0.871301	0.0995281
YDR026C	0	YDR026C	D	0.0503942	-0.361808	-0.238762		0.25246	0.244665
YDR026C	0	YDR026C	U	0.691859	-0.137752	0.46325	-0.423264	0.388573	-0.965501
YDR029W	0	YDR029W	D	-0.520462	-0.948838	-0.201231	-0.426366	-0.0690125	0.384203
YDR029W	0	YDR029W	U	0.726291	-0.230538	1.32169	-0.353531	0.790729	1.82712
YDR030C	RAD28	RAD28	D	0.384723	0.394382	0.0945623	-1.34682	0.913095	0.0953872
YDR030C	RAD28	RAD28	U	0.42877	0.210445	0.839756	-0.287189	0.643346	0.366047
YDR031W	0	YDR031W	D	0.193761	0.281961	0.469106	-0.850445	0.464031	-0.0575823
YDR031W	0	YDR031W	U	0.391763	0.209005	0.70654	-0.196913	0.668286	-0.260874
YDR032C	PST2	PST2	D	1.03102	-0.314911	-0.549376		0.378147	-0.21047
YDR032C	PST2	PST2	U	0.76842	-0.00365081	0.246085	-0.396942	0.793277	-0.204046
YDR033W	MRH1	MRH1	D	0.120122	0.429114	-0.122257		0.0532769	0.711356
YDR033W	MRH1	MRH1	U	0.480412	0.471159	0.272791	-0.263153	0.712655	-0.62524
YDR034C	LYS14	LYS14	D	1.00959	-0.439061	0.283702	0.112223	0.392802	-0.0711274
YDR034C	LYS14	LYS14	U	0.165228	-0.722876	0.540016	-1.35251	0.204149	-1.58793
YDR035W	ARO3	ARO3	D	0.630686	-0.963322	-0.559057	-0.35789	-0.0629658	-0.455634
YDR035W	ARO3	ARO3	U	0.162962	0.0736391	0.152686	-0.633224	0.363953	-0.127537
YDR036C	EHD3	EHD3	D	-0.175141	0.00151099	0.227729	0.232321	0.828366	-1.03169
YDR036C	EHD3	EHD3	U	0.02012	-0.140547	-0.193087	-0.340586	0.238016	-1.28824
YDR042C	0	YDR042C	D	0.0318667	0.108358	0.628709	-0.175313	0.060758	-0.391838
YDR042C	0	YDR042C	U	0.38322	0.959506	0.791277	0.190746	0.879327	0.746873
YDR043C	NRG1	NRG1	D	-0.778655	0.50765	-0.239457	-0.747121	0.833484	0.536335
YDR043C	NRG1	NRG1	U	-0.333079	-1.60334	-0.46349	-0.891571	0.607488	-0.484047
YDR046C	BAP3	BAP3	D	-0.162867	-0.236911	0.368592	-0.487555	0.480528	-0.837964
YDR046C	BAP3	BAP3	U	0.0445041	0.0169409	0.90663	-0.581757	0.627068	-0.8043
YDR048C	0	YDR048C	U	0.208021	-0.677582	-1.3303		-4.19911
YDR048C	0	YDR048C	D	-0.338704	-1.12088	-5.26784	-1.24915	-4.60554
YDR049W	0	YDR049W	D	1.30106	0.813588	-1.53083	-1.54275	-2.57409
YDR049W	0	YDR049W	U	-0.670072	-3.27011	-1.86037	-1.81575	-2.68881	-3.90327
YDR051C	0	YDR051C	D	-0.490657	0.100722	-0.0916414	-0.523196	0.757215	-0.455321
YDR051C	0	YDR051C	U	0.239841	0.631255	-0.342194	0.169908	0.798582	0.193303
YDR055W	PST1	PST1	D	-0.234597	-0.574524	1.24957	0.180353	1.33715	-0.6444
YDR055W	PST1	PST1	U	-1.05397	-0.86266	-0.28167	0.472419	-0.496148	1.16172
YDR056C	0	YDR056C	D	-0.852591	-0.593511	0.0181148	0.0479663	-0.367393	-0.105495
YDR056C	0	YDR056C	U	-0.287235	-0.54462	0.0713477	-0.201102	-1.19514	0.0468526
YDR057W	YOS9	YOS9	D	0.848715		-1.48208	-0.679517	-0.0772121	-0.366442
YDR057W	YOS9	YOS9	U	0.273089	1.14462	-0.823503	-0.611186	-0.104377	-0.562884
YDR058C	TGL2	TGL2	D	0.0213798	0.339983	0.434219	0.175287	-0.423778	1.31943
YDR058C	TGL2	TGL2	U	0.00441293	0.343186	-0.0786608	0.517216	-0.124144	-0.0547477
YDR059C	UBC5	UBC5	D	-0.62811	-0.179425	0.83256	0.427231	0.235607	0.0192428
YDR059C	UBC5	UBC5	U	-1.72868	-1.40374	-1.14814	-0.414338	-0.511934	0.62293
YDR061W	0	YDR061W	D	0.120418	0.185715	0.347598	-0.117803	0.713075	0.230376
YDR061W	0	YDR061W	U	-0.0675972	-0.620183	-0.109455	-0.651849	-0.566247	-0.0118266
YDR063W	0	YDR063W	D	-0.426168	-0.621102	0.34275	-0.164078	-0.295434	-0.0451934
YDR063W	0	YDR063W	U	-0.63511	-0.147787	-0.845016	0.0633617	0.147638	0.868864
YDR066C	0	YDR066C	U	-0.957269	0.102031	-0.60449		0.084274	0.611098
YDR066C	0	YDR066C	D	-0.513858	0.142156	1.96088	-1.16999	1.1076	-0.688368
YDR067C	OCA6	OCA6	D	-0.0656141	0.763072	0.569696	-0.593238	-0.0589288	-0.348744
YDR067C	OCA6	OCA6	U	-0.10714	0.0876898	0.891997	-0.454776	0.930628	-0.216712
YDR068W	DOS2	DOS2	D	-0.464016	-1.20743	0.80049	-0.300397	-0.0487883	-0.701674
YDR068W	DOS2	DOS2	U	0.501289	0.226188	-0.312938	0.76607	0.293294	0.557334
YDR070C	FMP16	FMP16	D	-0.785719	0.517791	-0.204539	-0.490969	-0.153227	-0.59156
YDR070C	FMP16	FMP16	U	-0.505113	-0.101848	-0.140629	0.00953696	-0.203506	-0.206323
YDR071C	PAA1	PAA1	D	1.74234	0.67378	1.02716	0.672305	-0.466342	-0.155687
YDR071C	PAA1	PAA1	U	0.589054	0.569722	0.656422	-1.68028	0.413006	-0.313191
YDR072C	IPT1	IPT1	D	-0.982007	-0.193996	0.42219	-0.682197	1.89248
YDR072C	IPT1	IPT1	U	-0.12684	-3.38758	-2.59646	0.595514	-3.102	0.445873
YDR073W	SNF11	SNF11	U			-0.0452172	0.701213	0.400822	1.26091
YDR073W	SNF11	SNF11	D	0.253924	0.536295	1.46297	0.273508	1.27157	0.335698
YDR073W	SNF11	SNF11	U	0.239801	0.896276	0.3184	0.577939	1.01367	0.718932
YDR075W	PPH3	PPH3	D	-1.23566		0.189108		0.386361	-0.425032
YDR075W	PPH3	PPH3	U	1.01483	-0.271782	-0.465693	-0.826017	-0.21513	0.194456
YDR077W	SED1	SED1	D	0.495899	0.142988	0.366893	-0.0252261	0.30974	0.14942
YDR077W	SED1	SED1	U	0.545954	-0.779444	-1.30231	0.523999	-0.444803	-0.272673
YDR078C	SHU2	SHU2	D	-0.914104	0.588089	-0.147591	0.215486	0.102092	0.557423
YDR078C	SHU2	SHU2	U	-1.46329	-1.27553	-0.62028	-2.46867	-1.0792	0.654314
YDR084C	TVP23	TVP23	D	0.490481	0.189935	0.00179901	0.2307	-0.647146	0.0111197
YDR084C	TVP23	TVP23	U	-0.865668	0.11025	-0.416366	-0.383348	-1.34982	0.574886
YDR085C	AFR1	AFR1	D	1.09527	-0.978798	1.07253	0.358996	-0.0707564	0.381329
YDR085C	AFR1	AFR1	U	-0.259291	-1.01808	0.147747	-1.1576	0.142028	0.19047
YDR089W	0	YDR089W	U	-1.16203	-0.290229	-0.0112621	-0.409728	-0.161917	0.372798
YDR090C	0	YDR090C	D	-0.35009	-0.460412	-0.12375	-0.380103	-0.423136	-0.178716
YDR090C	0	YDR090C	U	-0.873887	0.0314536	0.00707633	-0.534853	0.435478	-0.210873
YDR093W	DNF2	DNF2	D	-0.310357	0.8105	0.276827	0.809578	0.254014	1.13444
YDR093W	DNF2	DNF2	U	0.123215	-0.460237	0.454151	0.685301	-0.531481	0.254384
YDR094W	0	YDR094W	D	0.798771	0.428438	0.969839	0.563481	0.988755	-0.384305
YDR094W	0	YDR094W	U	-1.18001	-0.361477	-0.748103	-0.812889	-0.796973	0.225692
YDR095C	0	YDR095C	D	-0.00333786	1.47237	0.642199	-0.967259	0.454496	-1.13307
YDR095C	0	YDR095C	U	-0.332217	0.330932	-0.195751	-0.106649	0.0623277	-0.176884
YDR096W	GIS1	GIS1	D	-0.418421	-0.431987	-0.516088	-1.26744	-0.432291	-0.955036
YDR096W	GIS1	GIS1	U	0.100337	1.64416	0.848577	-0.442496	0.366742	0.0187962
YDR096W	GIS1	GIS1	U	0.098188	-1.23174	-0.173674	-0.386198	-0.467919	-0.875714
YDR097C	MSH6	MSH6	D	0.390512	-0.722333	-0.0315166	-0.601287	0.660943	-0.393822
YDR097C	MSH6	MSH6	U	0.161715	0.750851	0.609543	0.397016	0.866603	0.808342
YDR098C	GRX3	GRX3	D	-1.1038	0.440808	-0.158113	-0.48616	-0.240858	-0.607682
YDR098C	GRX3	GRX3	U	0.565683	0.172459	-0.768348	-0.491937	-0.0215274	-0.419305
YDR099W	BMH2	BMH2	D	-2.53061	-1.14232	-0.760061	-0.165319	0.874923	-0.0592647
YDR099W	BMH2	BMH2	U	-0.442816	-0.146232	1.20973	-0.269381	1.05742	0.0930901
YDR100W	TVP15	TVP15	D	-0.0331907	-2.71876	0.835945	-0.379046	-1.33736
YDR100W	TVP15	TVP15	U	0.0411432	1.74126	0.000735215	0.254264	0.489418	0.234064
YDR102C	0	YDR102C	D	0.118695	0.111338	0.810068	0.0893066	0.284224	-0.840102
YDR102C	0	YDR102C	U	-0.0989349	-0.175244	-0.220443	0.717065	-0.338669	0.432782
YDR104C	SPO71	SPO71	D	0.359682	0.348901	0.623644	0.123415	0.544088	0.323561
YDR104C	SPO71	SPO71	U	-0.681064	-0.664602	-0.851984	0.0603779	-0.399406	0.117296
YDR105C	TMS1	TMS1	U	-1.60191	-0.559284	-0.91925	-2.35667	-1.99714
YDR105C	TMS1	TMS1	D	0.455691	0.315605	0.874439	-0.246204	0.268582	-0.631737
YDR107C	0	YDR107C	D	-0.321593	-0.854757	0.295759	0.321309	0.521866	0.0708634
YDR107C	0	YDR107C	U	0.742681	1.00166	0.750098	1.77157	0.264874	0.653312
YDR108W	GSG1	GSG1	D	-0.820415	0.238525	-1.33335	-0.681193	-0.456673	-1.69042
YDR108W	GSG1	GSG1	U	-0.816739	-0.0987283	-0.754582	0.568753	-0.02405	-2.05005
YDR108W	GSG1	GSG1	U	0.370618	-0.164666	-1.04283	0.809567	-0.616971	0.187911
YDR109C	0	YDR109C	D	-0.182854	-0.533587	-0.712314	-0.354984	-0.347394	-0.430938
YDR109C	0	YDR109C	U	-0.29022	-1.00973	-0.196997	-1.44212	-0.202193	0.0895038
YDR110W	FOB1	FOB1	D	-0.730518	0.727198	-0.684924	-0.827552	-0.0339176	-1.18932
YDR110W	FOB1	FOB1	U	-0.339048	-1.18726	-0.288452	0.217053	-0.844713	0.494771
YDR111C	ALT2	ALT2	D	-0.271703	0.180463	-0.671608	-0.723447	-0.320749	-0.653613
YDR111C	ALT2	ALT2	U	-0.12302	-0.246909	-0.396924	-0.492909	-0.41349	0.0778096
YDR112W	IRC2	IRC2	D	-0.409768	-0.282535	-0.0946164	-0.220591	-0.874835	-0.595193
YDR112W	IRC2	IRC2	U	-0.603786	-0.131511	-0.564751	0.127569	-0.224456	0.218171
YDR116C	MRPL1	MRPL1	D	1.77814	-0.0897897	1.01301	-2.55435	-0.138939	-1.22486
YDR117C	TMA64	TMA64	D	0.357073	-0.17828	0.253722	0.0876878	0.616707	-0.238691
YDR117C	TMA64	TMA64	U	0.0357081	0.22533	0.85174	0.358094	0.111763	0.571691
YDR119W	0	YDR119W	D	-0.106119	0.245168	0.307185		-0.0786627	1.42371
YDR119W	0	YDR119W	U	-0.126501	-0.16299	-0.0418213	-0.124612	-0.0782652	0.118521
YDR120C	TRM1	TRM1	D	-1.71345	4.43849		-3.12593	-0.0045295	-1.6919
YDR121W	DPB4	DPB4	D	0.570401	-2.36051	-0.40669	-1.24877	0.193212	-1.37261
YDR121W	DPB4	DPB4	U	0.447668	-1.46653	-1.54822	-0.398165	-1.64443	-0.815425
YDR122W	KIN1	KIN1	D	-1.5825	-0.184405	-0.504448	-0.234039	0.251061	2.18278
YDR122W	KIN1	KIN1	U	-0.150865	0.301421	0.289298	-0.430076	0.207126	0.279391
YDR123C	INO2	INO2	U	-3.58563	-8.25695	-7.35194	-6.95696	-6.0464	-6.53758
YDR124W	0	YDR124W	D	-0.195343	-0.440707	1.02072		0.500701	0.152688
YDR124W	0	YDR124W	U	-0.585622	-0.100251	-0.390167		-0.421603	0.530636
YDR124W	0	YDR124W	U	-0.302595	-0.908022	-1.05484	0.319593	-0.434372	0.0324583
YDR125C	ECM18	ECM18	D				-2.08923	0.710227	0.0829655
YDR125C	ECM18	ECM18	U	0.98154		1.87941	0.728738	1.09348
YDR128W	0	YDR128W	U			1.71316	-0.316885	1.48372
YDR128W	0	YDR128W	D	0.257122		0.833836	-1.84385	1.14043	0.812849
YDR130C	FIN1	FIN1	D	0.00306316	-1.24462	-0.50097	-0.586533	-0.213206	0.447439
YDR130C	FIN1	FIN1	U	-0.473911	0.491526	-0.26478	-0.238686	0.258547	0.401948
YDR131C	0	YDR131C	D	0.250671	0.186574	0.112552	-0.00747364	-1.36153	0.0530095
YDR131C	0	YDR131C	U	0.713835	0.580711	1.07377	-0.454906	0.34887	-0.431433
YDR132C	0	YDR132C	D	-0.0539696	-0.0768878	-0.235848	0.309184	-0.256353	0.197883
YDR132C	0	YDR132C	U	0.0474943	-2.34547	-0.067759	-0.429804	0.189675	-0.314134
YDR133C	0	YDR133C	D	0.167063	-0.486355	-0.0920172	-0.821602	-0.16023	-0.660875
YDR133C	0	YDR133C	U	-0.183789	0.917605	0.112851	-0.208725	0.0545064	0.397566
YDR134C	0	YDR134C	D	-0.0934013	0.186629	0.137081	0.0102287	0.210196	0.175017
YDR134C	0	YDR134C	U	0.565184	-0.683327	1.03285	0.0632193	0.272865	-0.0828902
YDR135C	YCF1	YCF1	D	-0.545933	0.538829	-0.0821816		-0.270792	-0.553191
YDR135C	YCF1	YCF1	U	-0.557745	-0.0133911	-0.477499	-0.707403	0.120897	0.402159
YDR139C	RUB1	RUB1	D	0.531985	-0.219581	-0.0183251	-0.214684	-1.00009	-0.321929
YDR139C	RUB1	RUB1	U	0.5071	-1.11192	-0.813772	0.177054	-0.198203	0.0397972
YDR142C	PEX7	PEX7	U			-0.239941	-2.4827	0.443247
YDR142C	PEX7	PEX7	D	0.157736	0.403959	-0.547505	0.207781	0.65224	0.140031
YDR143C	SAN1	SAN1	D	0.493058		-1.33495	-1.15111	-1.39499	-0.733443
YDR143C	SAN1	SAN1	U	0.852631	-0.242625	0.203114	-0.213466	-0.0510084	-0.698902
YDR144C	MKC7	MKC7	U				-1.0984	-0.635094	0.470835
YDR144C	MKC7	MKC7	D	0.39882	0.425753	-0.392886	-1.1315	-0.401627	-0.699245
YDR146C	SWI5	SWI5	D	0.981447	-0.481087	1.9224	0.680413	0.682789	0.443283
YDR146C	SWI5	SWI5	U	1.22344	-0.598167	1.22597	0.774342	1.52493	0.420493
YDR147W	EKI1	EKI1	D	0.337485	1.06072	0.544804	0.633652	0.287818	-0.475615
YDR148C	KGD2	KGD2	U	0.660465	-2.23958	1.11405	0.245756	-2.16039	-1.82199
YDR151C	CTH1	CTH1	D	-0.753142	-0.00122048	-0.0419416	0.548496	0.162189	1.76799
YDR151C	CTH1	CTH1	U	-0.289244	0.185928	-0.945487	-0.909441	-0.262651	-0.0581691
YDR152W	GIR2	GIR2	D	-0.198885	-0.124985	0.268396	-0.781977	-0.483059	0.546236
YDR152W	GIR2	GIR2	U	-0.784542	-0.812402	-0.445006	-0.945742	-0.927755	0.0453252
YDR153C	ENT5	ENT5	U	-0.10623	-0.0351364	-0.0754845	0.733625	-0.261401	0.138993
YDR154C	0	YDR154C	D	-1.4141		-4.3584			1.99994
YDR154C	0	YDR154C	U	0.893098	0.262985	0.296389	0.616151	0.116515	-0.0338352
YDR155C	CPR1	CPR1	U	0.437683	0.739704	1.10481	1.35423	0.284184	0.546746
YDR156W	RPA14	RPA14	D	-3.24229	0.0910831	-1.44014	0.898631	1.01474	1.37642
YDR156W	RPA14	RPA14	U	-1.29767	-0.471993	0.101858	0.133278	0.743886	0.770922
YDR157W	0	YDR157W	U	-1.2091	0.556325	-1.17774		-3.82854	-0.833965
YDR163W	CWC15	CWC15	D	-0.264899	-0.406466	0.105814	-1.01504	-0.736014	-0.852849
YDR165W	TRM82	TRM82	D	0.0821252	-1.47961	0.180429	-1.13544	0.585608	0.497718
YDR169C	STB3	STB3	U	0.544404	0.475777	0.650225	0.365905	-0.177697
YDR169C	STB3	STB3	D	0.197618	0.479935	0.184931	0.435023	0.0882947	-0.00728605
YDR171W	HSP42	HSP42	D	-0.495045	-1.01543	-0.752554	0.768352	-0.891934	0.582587
YDR171W	HSP42	HSP42	U	0.00410626	0.0261827	-0.137895	0.314577	0.0790731	-0.0552283
YDR178W	SDH4	SDH4	D	0.291517	0.541795	-1.18483	-0.933401	-1.11148	-0.621549
YDR179C	CSN9	CSN9	U	-2.09973		-1.34243	-2.93083	-0.433683	0.952464
YDR179C	CSN9	CSN9	D	-0.572975	0.703328	-0.927776	-0.634364	-0.0895824	-0.358694
YDR179W-A	0	YDR179W-A	D	-0.125473	0.0511283	-0.520872	0.350853	0.0488756	0.184718
YDR181C	SAS4	SAS4	D	0.520235	-0.136917	0.351626	0.432096	0.228878	-0.421155
YDR183W	PLP1	PLP1	D	-0.119553	-0.285756	0.17031	0.183493	-0.140814	-0.550359
YDR183W	PLP1	PLP1	U	0.10759	0.120636	1.24298	-0.47364	0.544953	-0.514277
YDR184C	ATC1	ATC1	D	1.16777	1.92715	-0.0245851	0.39877	-0.473636	-0.594829
YDR185C	0	YDR185C	D	0.275685	0.337036	0.0914297	0.0885099	-0.0533525	-0.604714
YDR185C	0	YDR185C	U	-0.516246	1.13233	0.371932	-0.532727	0.480675	0.0250552
YDR186C	0	YDR186C	U	-0.366628		-4.64922		-2.49136	-6.13157
YDR186C	0	YDR186C	D	0.181309	-0.3304	-2.47109	-6.08734	-7.30615	-5.86413
YDR191W	HST4	HST4	D	-0.488154	0.0182161	-0.580714	0.337878	-0.0301808	-0.208211
YDR191W	HST4	HST4	U	-0.419604	0.484162	0.0660169	0.381481	0.353105	-0.301665
YDR192C	NUP42	NUP42	D	0.247791	-0.762712	0.0634876	0.412063	-0.0418355	-0.0744728
YDR192C	NUP42	NUP42	U	0.868023	-0.465238	0.724359	0.378911	0.712932	-0.181573
YDR193W	0	YDR193W	D	0.580679	-0.0131972	0.735247	-0.118062	0.169025	0.112623
YDR193W	0	YDR193W	U	0.799154	1.41691	1.53781	0.0991895	0.683676	0.619446
YDR193W	0	YDR193W	U	0.515183	1.12105	0.983146	0.0811364	0.702591	0.736703
YDR198C	RKM2	RKM2	D	0.24989	0.477558	0.257054	-0.113703	0.00489431	-0.209834
YDR198C	RKM2	RKM2	U	-3.82444	-3.10611	-2.00129	-1.59562	-2.62913	-4.01015
YDR198C	RKM2	RKM2	U	-1.02097	0.162539	-1.93435	-1.09345	-0.519906	-0.3924
YDR199W	0	YDR199W	D	-1.10863	1.1316	-0.273854	-0.572361	-1.67118	-1.53805
YDR202C	RAV2	RAV2	U	0.0122974	-0.604818	-1.82721	-1.31365	-1.85704
YDR202C	RAV2	RAV2	D	0.20246	0.290534	-0.513071	-0.309653	-1.08877	-1.48361
YDR203W	0	YDR203W	U			-2.44715	-2.73024	1.31226	-2.22438
YDR203W	0	YDR203W	D	0.752035	2.33144	-1.3279	-1.23846	0.604939	-1.51558
YDR205W	MSC2	MSC2	D	-0.355307	0.137426	-0.399946	2.1392	-0.184348	1.84024
YDR205W	MSC2	MSC2	U	1.15899	1.20591	1.05585	-0.594	0.737515	-0.566597
YDR206W	EBS1	EBS1	D	0.461986	0.691665	0.32032	-0.397413	0.000515765	-0.209382
YDR206W	EBS1	EBS1	U	-0.258351	-0.0458593	0.964692	0.794629	0.449139	-0.0695024
YDR209C	0	YDR209C	D	0.229935	1.05552	0.00421259	-0.733485	0.537626	-0.27581
YDR209C	0	YDR209C	U	0.0283318	0.52492	0.897835	0.903	0.548609	-0.4248
YDR210W	0	YDR210W	U	0.614094	-0.679112	0.223896	-0.471081	0.778577	-0.565918
YDR213W	UPC2	UPC2	D	0.554051	0.790058	0.438454	0.531354	0.185227	0.11654
YDR213W	UPC2	UPC2	U	0.0971473	0.15955	-0.369594	0.393951	1.32456	-0.0681035
YDR214W	AHA1	AHA1	D	0.216993	0.72665	-0.0966513	0.280884	0.031683	0.994194
YDR214W	AHA1	AHA1	U	0.566585	-0.657373	0.482845	-0.0138029	0.243385	0.00661381
YDR215C	0	YDR215C	D	0.264371	0.394205	0.357159	0.0335776	-0.461661	0.542215
YDR215C	0	YDR215C	U	0.594588	0.476054	0.836782	-0.489741	0.486917	0.179379
YDR216W	ADR1	ADR1	D	0.273944	-0.129227	-0.829786	1.03559	0.0567761	2.36555
YDR216W	ADR1	ADR1	D	0.916043	0.681591	-0.467204	0.285346	0.604873	0.512988
YDR216W	ADR1	ADR1	U	0.136348	-0.0887139	0.398221	-0.630868	0.643075	0.305589
YDR217C	RAD9	RAD9	D	-0.261262	-0.714594	-1.19009	0.0522815	0.948196	0.939359
YDR217C	RAD9	RAD9	U	0.703908	0.301516	0.759041	0.613644	1.51729	1.17291
YDR218C	SPR28	SPR28	D	-0.1104	0.228087	-0.688283	0.125159	0.684846	-0.485616
YDR218C	SPR28	SPR28	U	0.564748	0.431287	-0.897933	1.29817	-0.434989	0.610108
YDR219C	MFB1	MFB1	D	0.420806	-1.55712	0.488288	-0.546276	-1.18741	0.487552
YDR219C	MFB1	MFB1	U	0.663051	0.855981	-0.182984	-1.58082	-0.4729	0.294526
YDR220C	0	YDR220C	D	0.206644	0.602691	0.0850169	-0.0979852	0.282592	0.671511
YDR220C	0	YDR220C	U	-1.53399	-0.875169	-1.76421	-2.46484	0.0644852	0.56925
YDR221W	GTB1	GTB1	D	0.277295	-0.651883	-1.11586	0.706874	-0.625762
YDR222W	0	YDR222W	D	-0.516411	1.29717	-0.380593	0.554747	0.0148736	0.339526
YDR222W	0	YDR222W	U	0.809366	0.0829925	0.657893	0.702348	1.1384	0.600367
YDR223W	CRF1	CRF1	D	-0.142484	0.265059	0.2537	-0.169451	0.0206686	0.431427
YDR223W	CRF1	CRF1	D	-0.656976	-0.0234997	0.511855	0.127885	0.0107466	0.640561
YDR223W	CRF1	CRF1	U	0.301371	0.589128	0.872206	-0.279109	1.22011	-0.731452
YDR229W	IVY1	IVY1	D	-1.14752	-1.10561	-0.161945	-0.46364	-0.0625881	0.24072
YDR229W	IVY1	IVY1	U	-0.0215544	0.173752	-0.0624037	-0.134885	0.137821	-0.725503
YDR233C	RTN1	RTN1	D	-0.230085		0.00701815	-0.131841	-0.558319	-0.967432
YDR233C	RTN1	RTN1	U	0.565736	-0.0257044	0.693414	-0.766796	0.197417	-0.635758
YDR239C	0	YDR239C	D	0.280169	0.422114	0.516742	-0.710281	0.857445	0.36591
YDR239C	0	YDR239C	U	0.270531	0.392227	0.255514	0.120108	1.32302	-0.170589
YDR242W	AMD2	AMD2	D	1.01789	0.571929	0.695084		0.534221	-0.451155
YDR242W	AMD2	AMD2	D	0.695096	-0.210871	-0.39082	0.669265	0.0547009	1.86837
YDR242W	AMD2	AMD2	U	0.297772	1.30776	-0.180984	0.28643	1.37376	0.644596
YDR242W	AMD2	AMD2	U	-0.0879364	0.537372	-0.40682	0.0999858	1.14218	0.272733
YDR244W	PEX5	PEX5	U	1.12769		-0.581967	4.31652	0.954856
YDR247W	VHS1	VHS1	U	0.454673	0.191498	0.351305		1.1501	0.0291671
YDR247W	VHS1	VHS1	D	-0.155604	0.737538	0.0484687	0.387944	0.664054	0.491135
YDR248C	0	YDR248C	D	-1.64935	-0.650696	-0.807787	1.06179	-0.436414	1.22727
YDR248C	0	YDR248C	U	0.167081	0.764221	-0.154478	0.0407586	0.381774	0.167216
YDR249C	0	YDR249C	D	-1.46668	-0.53563	-1.6741	1.54801	-0.824176	2.2705
YDR249C	0	YDR249C	U	-0.00149195	-0.170145	0.539561	-0.0568327	0.0295457	-0.346706
YDR250C	0	YDR250C	D	0.266572	-1.40021	-1.38222	1.9725	-0.050054	3.32671
YDR250C	0	YDR250C	U	0.254097	0.74544	0.545385	-0.465564	0.253726	-0.144264
YDR251W	PAM1	PAM1	D	-0.755929	0.586423	-0.339621	0.668418	0.472873	0.259353
YDR251W	PAM1	PAM1	U	-0.351534	-0.053936	0.433594	-0.401445	-0.245003	-0.0276933
YDR252W	BTT1	BTT1	D	-1.40099	-0.00904541	0.894941	-0.367989	0.416321	0.0590764
YDR252W	BTT1	BTT1	U	0.103911	0.0957551	0.432289	0.113608	0.151363	0.389599
YDR253C	MET32	MET32	D	-0.677422	0.882616	-0.33768	0.509492	0.175722	1.04656
YDR253C	MET32	MET32	U	-1.15021	-1.44695	-0.759174	0.140193	-0.33795	-0.402179
YDR254W	CHL4	CHL4	D	-0.685562	0.652084	1.44541	0.150338	-0.24034	0.0279874
YDR254W	CHL4	CHL4	U	0.647012	1.24826	0.103912	1.13758	-0.724013	1.71736
YDR255C	RMD5	RMD5	D	-2.22155	1.09306	1.39131	-2.04971	-1.63412	-1.56052
YDR256C	CTA1	CTA1	U	0.632126	0.901601	1.19352		0.552924	0.432684
YDR256C	CTA1	CTA1	D	0.0617707	-0.707383	0.0271858	1.2213	-0.156129	1.71184
YDR257C	SET7	SET7	D	0.659523	-0.219557	0.695266	0.321587	-0.227729	0.115178
YDR257C	SET7	SET7	U	-0.661224	-0.682417	0.206264	0.943693	0.735153	0.175649
YDR258C	HSP78	HSP78	D	0.161931	-0.4392	-0.137062	-0.00983161	0.239767	0.0322613
YDR258C	HSP78	HSP78	U	0.12316	-1.68284	0.180938	-0.507026	-0.0192988	0.241053
YDR259C	YAP6	YAP6	D	-1.34342	-0.370452	0.103833	-0.309798	0.504304	0.529127
YDR259C	YAP6	YAP6	U	0.106176	0.120573	0.806353	0.39307	0.584605	0.244217
YDR260C	SWM1	SWM1	D	0.0835293	0.0354393	-0.202024	-0.216239	-0.268773	0.255707
YDR260C	SWM1	SWM1	U	1.62066	-0.233311	1.41478	0.560118	0.622416	0.474952
YDR261C	EXG2	EXG2	D	-0.439306	-0.522342	0.0693988	0.143564	0.459822	-0.433553
YDR261C	EXG2	EXG2	U	0.413675	1.00069	-0.163145	0.597919	0.182074	-0.219881
YDR262W	0	YDR262W	D	-0.0813501	-0.351791	-0.0438953	-1.1204	0.642742	-0.409485
YDR262W	0	YDR262W	U	0.935316	0.374596	0.0552498	0.069015	1.23248	0.345795
YDR263C	DIN7	DIN7	D	1.18418	0.79253	0.0767058	-0.105999	0.511488	-0.240238
YDR263C	DIN7	DIN7	U	-0.453281	0.806209	0.526717	0.582958	-0.466029	-0.0551305
YDR265W	PEX10	PEX10	U	0.0564606		0.38345		0.735808
YDR265W	PEX10	PEX10	D	1.43769	1.13485	1.96302	2.57481	1.54162	0.56805
YDR266C	0	YDR266C	U	-1.36573	0.186896	-1.50517	0.291833	0.507068
YDR266C	0	YDR266C	D	-0.963187	0.254539	-1.18655	0.0774828	-0.0714554	0.0467038
YDR269C	0	YDR269C	U			1.23641	2.15001	1.57284
YDR269C	0	YDR269C	D	1.13732	1.15519	-0.123999	0.952705	0.431651	-0.407835
YDR269C	0	YDR269C	U	-0.11994	0.917608	0.227517	1.12331	0.852603	0.720084
YDR270W	CCC2	CCC2	D	-0.199151	1.50098	0.297151	0.404648	0.679651	0.389683
YDR271C	0	YDR271C	D	0.23674	-0.100594	-0.209218	0.805519	0.456897	0.418424
YDR272W	GLO2	GLO2	U	-2.78433	0.668849	-0.211376	-0.229627	-0.12621
YDR272W	GLO2	GLO2	D	-0.771941	-0.476331	-0.610706	0.250201	0.419022	0.788313
YDR273W	DON1	DON1	D	-0.345337	-0.281587	-0.193626	-0.295835	-0.116664	-0.281542
YDR273W	DON1	DON1	U	-0.990906	-0.608091	-0.541978	0.21249	0.110375	-0.442014
YDR273W	DON1	DON1	U	-2.49121	-0.216425	-2.89627	-1.07316	-1.3172	-2.46409
YDR274C	0	YDR274C	D	0.171787	-0.680462	-0.249621	-0.857499	0.274693	-0.161281
YDR274C	0	YDR274C	U	-1.50925	0.0336084	-2.04467	0.759324	-1.6081	1.87594
YDR275W	BSC2	BSC2	D	-0.811323	-0.434617	-0.902029	0.44735	0.773017	2.67714
YDR275W	BSC2	BSC2	U	-0.647837	-0.469267	-0.116672	0.691944	0.00497922	-0.667021
YDR277C	MTH1	MTH1	D	-0.382807	-0.472877	0.722035	-0.0444887	-0.0319025	0.116856
YDR277C	MTH1	MTH1	U	0.146602	0.409212	0.168761	-0.487359	-0.446276	-0.344685
YDR278C	0	YDR278C	D	-0.937399	0.105932	-0.64156	-0.0994144	0.26656	-0.144072
YDR278C	0	YDR278C	U	-1.08446	0.612988	-0.418875	-0.394785	-2.10501	-0.199248
YDR279W	RNH202	RNH202	D	0.958971	-1.67821	0.957581	0.192785	-0.123691	-0.198575
YDR279W	RNH202	RNH202	U	0.260611	0.232376	0.22078	1.71058	1.74307	1.79035
YDR282C	0	YDR282C	U	0.444216	-0.121431	0.186594		1.9573	-0.28274
YDR282C	0	YDR282C	D	0.52263	-1.58153	-0.0628929	0.330579	-0.157135	0.707056
YDR283C	GCN2	GCN2	D	-4.17704	-0.687593	-4.20874	-1.80469	-2.11935	-1.21984
YDR284C	DPP1	DPP1	D	-0.251704	-0.507278	-0.0741701	0.0943687	0.059427	-0.0724929
YDR284C	DPP1	DPP1	U	-2.18114	0.163765	-0.170442	0.516404	0.581167	0.780583
YDR285W	ZIP1	ZIP1	D	-0.634836	-0.867624	-1.00358	0.663912	-0.386957	1.58453
YDR285W	ZIP1	ZIP1	U	-1.18951	-1.0913	-1.65385	1.25767	-1.98596	0.778238
YDR286C	0	YDR286C	U	-0.150168	0.879071	0.863339		0.470282	1.23078
YDR286C	0	YDR286C	D	1.15814	0.351469	1.16817	0.650476	0.428932	0.742057
YDR286C	0	YDR286C	U	0.817752	-0.20633	0.134431	-0.711976	0.680161	1.95246
YDR287W	0	YDR287W	D	0.17747	0.612101	1.2328	0.622575	1.0006	-0.510747
YDR289C	RTT103	RTT103	D	0.639072	2.70931	-5.79804	1.23112	-1.08535
YDR290W	0	YDR290W	U	-0.562047	-1.00619	1.16851	-0.891262	1.43151	0.772804
YDR291W	HRQ1	HRQ1	D	0.686318	0.350692	-0.100256	-0.0766294	0.284588	0.970923
YDR291W	HRQ1	HRQ1	U	-0.91733	-0.118728	-0.841489	-0.575359	0.0809129	-0.709224
YDR294C	DPL1	DPL1	D	-0.663083	-0.893771	0.0978079	0.04905	-1.29715	0.834402
YDR294C	DPL1	DPL1	U	-0.620438	-1.36116	-0.359235	-0.903725	-0.332011	0.256153
YDR295C	HDA2	HDA2	D	0.461964	-0.386901	1.07508	-0.741334	0.434621	-0.488239
YDR295C	HDA2	HDA2	U	0.541711	0.256301	0.321002	-0.0910907	0.78835	0.600215
YDR297W	SUR2	SUR2	D	0.0193841	-0.074722	-0.29375	-0.0106716	0.0103538	-0.271034
YDR297W	SUR2	SUR2	U	-0.957481	-0.448196	-1.0135	-0.638262	-0.551513	-1.86007
YDR304C	CPR5	CPR5	D	1.08474	-0.150147	-0.752979	-0.0812904	0.519663	0.351411
YDR304C	CPR5	CPR5	U	0.604664	0.104227	0.410032	-0.570754	0.398725	0.488889
YDR305C	HNT2	HNT2	D	-0.410296	-0.837692	-0.381828	0.239179	-1.1253	-0.218424
YDR305C	HNT2	HNT2	U	-1.03914	0.276091	-0.344923	-1.48341	-1.65492	0.652831
YDR306C	0	YDR306C	D	0.47212	-0.986927	0.617258	0.192756	-0.0521451	0.286588
YDR306C	0	YDR306C	U	-0.294544	-0.0621557	-0.293676	-0.453085	0.347952	0.295565
YDR307W	0	YDR307W	D	0.0815172	0.583732	0.337194	0.0652619	0.305227	-0.145487
YDR307W	0	YDR307W	U	0.139737	-0.179523	0.313036	-1.01028	-0.669531	0.249165
YDR309C	GIC2	GIC2	D	0.391608	0.551837	0.917791	0.150197	1.11012	-0.519987
YDR309C	GIC2	GIC2	U	0.170763	-0.198884	1.2991	-0.000809995	0.119052	0.521615
YDR310C	SUM1	SUM1	D	0.390159	0.196713	1.02882	-1.1753	-0.555652	-0.482152
YDR310C	SUM1	SUM1	U	1.49721	0.633527	-0.261955	-0.425308	0.82078	0.420115
YDR312W	SSF2	SSF2	D	-0.528268	0.114651	0.00373578	-0.166487	-0.645102	0.211097
YDR312W	SSF2	SSF2	U	0.622661	-1.15634	-0.703031	0.33392	0.653915	1.35143
YDR313C	PIB1	PIB1	D	-0.608085	0.609099	-0.147804	-0.874547	0.890967	0.759495
YDR313C	PIB1	PIB1	U	-0.122692	0.633312	0.401345	-0.0617466	-0.197572	0.202945
YDR314C	RAD34	RAD34	U	0.351484	-0.372292	-0.832296		0.692079
YDR314C	RAD34	RAD34	D	-0.635122	-0.196073	-1.12992	1.89625	0.194458	1.93494
YDR315C	IPK1	IPK1	D			-0.659599	-0.867514	-1.50724	-0.92104
YDR316W	OMS1	OMS1	D	0.341416	-2.43882	0.0915303	-1.01434	-0.375109	0.30163
YDR317W	HIM1	HIM1	D	1.18366	1.63697	0.0553161	0.612147		1.0851
YDR317W	HIM1	HIM1	D	-0.106465	-1.42231	1.8137	-0.517928	-3.86169	0.929866
YDR317W	HIM1	HIM1	U	-0.333556	0.369855	1.60241	1.50163	-1.18869	1.66072
YDR318W	MCM21	MCM21	D	-1.46622			-3.16167	1.56658
YDR319C	0	YDR319C	D	0.0776258	-0.365459	0.266946	-0.238781	0.31005	0.0486588
YDR319C	0	YDR319C	U	0.800799	-0.833474	0.146	0.655474	0.195717	0.489237
YDR321W	ASP1	ASP1	D	-0.00375956	-0.844343	0.36582	-0.224988	0.536515	0.973972
YDR321W	ASP1	ASP1	U	-0.455756	0.818279	-0.323886	-0.266983	0.657664	0.924265
YDR326C	0	YDR326C	D	1.45157	1.18469	0.491255	0.1779	0.0328748	0.295258
YDR326C	0	YDR326C	U	0.164088	-2.01368	0.4285	0.0509011	-0.151958	0.113338
YDR329C	PEX3	PEX3	D	-0.97886	-0.814121	-3.5823	0.183718	-2.17002	0.630778
YDR330W	UBX5	UBX5	D	-0.794656	0.767556	-0.45778	-0.720453	-0.111511	-0.401319
YDR330W	UBX5	UBX5	U	-1.00062	1.521	0.425188	-1.26036	0.529575	-0.45761
YDR333C	0	YDR333C	U	0.115629	0.574212	0.756179		0.758257	-1.58361
YDR333C	0	YDR333C	D	0.405146	-0.231005	-0.597842	0.821995	0.856454	-0.236921
YDR334W	SWR1	SWR1	D	-1.7739			-0.55657	0.0377687
YDR335W	MSN5	MSN5	D	-2.93189			-1.82241	1.53197
YDR336W	0	YDR336W	D	0.406879	0.435534	1.46204	2.43814	-0.372032	0.479638
YDR336W	0	YDR336W	U	-0.638691	0.199176	-0.716301	0.0105719	-0.758288	0.693264
YDR338C	0	YDR338C	D	-0.522512	-0.097746	-0.477281	0.396095	-0.405057	2.07117
YDR338C	0	YDR338C	U	0.403286	0.205757	0.615953	-0.190712	0.478273	0.315846
YDR340W	0	YDR340W	D	0.303737	0.596948	-0.0532797	3.02176	-0.495161	3.52199
YDR340W	0	YDR340W	U	-0.0355071	1.08339	0.130316	0.0623747	0.00884398	0.668709
YDR344C	0	YDR344C	D	-0.744303	-1.09911	-0.535202		-0.188413	0.205895
YDR344C	0	YDR344C	U	0.133601	0.954871	1.027	0.634481	0.847003	0.317464
YDR345C	HXT3	HXT3	D	-0.0768549	-0.792911	0.766962	0.0118823	0.690766	0.199907
YDR345C	HXT3	HXT3	U	0.53721	-0.900633	-0.0224898	-0.0287228	-0.0182476	1.88668
YDR346C	SVF1	SVF1	D	4.15839	1.20161	3.4926	3.73776	2.39719	2.20685
YDR346C	SVF1	SVF1	U	2.67034	0.696053	2.50861	1.41939	1.94183	1.57142
YDR348C	0	YDR348C	D	-1.02362	1.80464	0.80125	0.730795	-2.13023	-0.722334
YDR349C	YPS7	YPS7	D	-2.23783	-0.584258	-0.417595	0.476396	-0.78969	-0.922474
YDR349C	YPS7	YPS7	U	-1.50098	0.768481	0.147516	-0.213408	-0.233239	-1.65186
YDR351W	SBE2	SBE2	D	-0.820799	0.521679	0.190773	0.701505	-0.152955	1.62085
YDR351W	SBE2	SBE2	U	-0.455472	0.333145	0.642876	0.805288	0.356289	-0.291051
YDR352W	0	YDR352W	D	0.0467685	0.00224869	-0.0767596	-0.265389	-0.496784	0.123959
YDR352W	0	YDR352W	U	-1.03489	-0.328603	-1.46353	-0.542649	-0.480577	-0.0483557
YDR354W	TRP4	TRP4	D	1.54045	0.280972	1.95072	0.111544	0.513732	-0.0940597
YDR354W	TRP4	TRP4	U	-0.640523	-0.326604	-0.666505	-0.183328	0.512489	0.416789
YDR357C	0	YDR357C	D	0.0464538	-0.0256424	-0.549657	0.129627	-0.262681	0.812145
YDR357C	0	YDR357C	U	-0.25167	-0.517797	-0.420954	0.390654	-0.422011	-1.05447
YDR358W	GGA1	GGA1	D	0.821858	-0.144074	-0.562436	0.23991	-0.706576	-0.0144204
YDR358W	GGA1	GGA1	U	0.273027	-0.30301	0.041806	-0.384368	0.249579	0.365013
YDR359C	VID21	VID21	D	-0.796897	-0.314028	0.0714013		0.468369
YDR360W	OPI7	OPI7	U			1.18198	-0.460423	-0.124518
YDR360W	OPI7	OPI7	D	-0.907419	0.210171	-1.24499	0.122581	-0.462162	0.0189645
YDR360W	OPI7	OPI7	U	-0.497413	0.749068	-0.92127	0.56924	-0.572798	-0.835145
YDR368W	YPR1	YPR1	D	-0.380046	-1.23496	-0.397957	0.571307	0.288881	0.2199
YDR368W	YPR1	YPR1	U	-1.11452	-1.62462	-0.658542	-1.21809	0.221341	-0.853864
YDR370C	0	YDR370C	D	-0.00999456	-0.941729	0.401466	0.76451	0.288659	0.883182
YDR370C	0	YDR370C	U	-0.653505	-0.0422011	0.3334	-0.165012	0.76698	-0.374088
YDR371W	CTS2	CTS2	D	-0.262593	-0.50937	-0.407923	-0.169911	0.194251	0.857024
YDR371W	CTS2	CTS2	U	-0.656028	-0.452159	-0.289722	-1.02989	-1.01595	-1.08861
YDR374C	0	YDR374C	D	-0.56941	-0.188713	0.117946	-0.225601	-0.713443	-0.212434
YDR374C	0	YDR374C	U	-0.496058	0.19203	-0.344592	0.540144	-0.859808	-0.184731
YDR375C	BCS1	BCS1	U	0.474068	2.43323	1.99994		0.626078
YDR378C	LSM6	LSM6	D	2.01635	2.47719	1.99208												Fold enrichment	log2 ratio (dayX/day1)	2vs1	4vs1	6vs1	8vs1	10vs1	14vs1	of time points
YDR379W	RGA2	RGA2	D	-0.282519	-0.565862	0.228503	0.230517	0.0429136	-0.490023
YDR380W	ARO10	ARO10	U	-0.623701		-0.792676	0.411312	1.35929	-0.28421
YDR380W	ARO10	ARO10	D	-0.717875	-0.13114	-0.915686	-0.138157	0.16654	0.170455
YDR383C	NKP1	NKP1	D	0.20636	-1.16629	-0.0693768	-0.667047	0.293049	0.529376
YDR383C	NKP1	NKP1	U	-0.144935	0.134642	0.588793	-0.113313	-0.0487226	-0.518428
YDR384C	ATO3	ATO3	D	-0.439602	-0.30461	-1.58664	-0.479108	-0.514376	0.0999341
YDR384C	ATO3	ATO3	U	-0.443429	0.362487	-0.339489	-0.581615	0.0497866	-0.0451167
YDR386W	MUS81	MUS81	D	-4.09745	-1.44075	-3.49144	0.687216	-2.42045	0.552407
YDR386W	MUS81	MUS81	U	0.170999	-0.131361	0.784296	-0.883619	1.56017	-0.753292
YDR387C	0	YDR387C	U	0.209611	-0.228315	0.975761	1.33842	-0.143767
YDR387C	0	YDR387C	D	0.0461151	0.885378	0.743997	0.681094	-0.554673	0.383389
YDR387C	0	YDR387C	U	0.462026	0.677348	-0.383473	0.268296	0.426447	0.183257
YDR388W	RVS167	RVS167	U	0.0271259	-0.0262059	-0.749275		-0.674277
YDR391C	0	YDR391C	D	-0.449023	-0.304038	0.215362	-0.953442	-0.44243	0.949366
YDR391C	0	YDR391C	U	0.130248	-0.692791	-0.541602	0.403679	-0.523526	-0.313987
YDR395W	SXM1	SXM1	D	-3.31943	-0.861368	-1.64321	0.217183	-1.66134	0.807358
YDR395W	SXM1	SXM1	U	0.476811	0.112549	-0.325556	-0.226059	0.475076	1.74526
YDR399W	HPT1	HPT1	D	-0.498898	-0.289365	0.118892	0.117425	0.380301	0.460098
YDR399W	HPT1	HPT1	U	0.356685	1.42832	0.61072	0.415793	0.390843	0.100459
YDR400W	URH1	URH1	D	-0.590282	-0.162965	0.00854807	0.368299	-0.509996	0.320125
YDR400W	URH1	URH1	U	-1.63305	0.181587	-0.766917	0.44722	-1.64965	1.04999
YDR400W	URH1	URH1	U	-0.507466	0.977948	-0.781883	0.523606	-1.50767	0.0533075
YDR401W	0	YDR401W	D	-0.311875	-0.18295	-0.827997		-1.2849	2.89567
YDR402C	DIT2	DIT2	D	-0.914009	-0.851968	-0.763226	0.441808	0.0186023	0.277739
YDR402C	DIT2	DIT2	U	-0.920769	0.620384	-1.8854	0.0215696	0.235202	0.110751
YDR403W	DIT1	DIT1	D	0.19568		0.0946505	-0.413516	0.978143	0.612213
YDR403W	DIT1	DIT1	U	-0.630763	0.066784	-0.933553	-0.796961	-0.816181	-0.829331
YDR406W	PDR15	PDR15	D	-1.11817	1.07695	0.0731899	-0.217085	-0.615434	0.661758
YDR406W	PDR15	PDR15	U	-0.196188	-0.180363	-0.311984	-0.574998	-0.130233	0.111508
YDR409W	SIZ1	SIZ1	D	-1.83902	0.567766	0.170589	0.419085	0.170816	0.793234
YDR409W	SIZ1	SIZ1	U	-0.573236	0.806059	-0.0131996	-0.374583	-0.192492	-0.42923
YDR411C	DFM1	DFM1	D	-0.0908682	-0.028807	0.367104	0.704101	0.324264	0.946834
YDR411C	DFM1	DFM1	U	0.0672905	-0.273151	0.0371857	-0.308091	0.451701	0.305396
YDR414C	ERD1	ERD1	D	-1.32907	1.68642	-1.09185	-1.27673	0.191183	-3.63054
YDR414C	ERD1	ERD1	U	-1.87925	0.450743	-1.5296	-0.396239	0.263123	-1.24842
YDR415C	0	YDR415C	D	0.406659	-0.803055	0.0882872	0.110831	0.324441	0.0636635
YDR415C	0	YDR415C	U	-0.00419797	0.0251242	-0.423582	-0.264187	-0.399954	-0.0636515
YDR419W	RAD30	RAD30	D	-0.709633	0.231358	-0.25549	0.12416	0.210506	0.405184
YDR419W	RAD30	RAD30	U	-0.526145	-0.107032	0.286284	0.303375	-0.798258	0.0633416
YDR420W	HKR1	HKR1	D	-0.173172	0.0508661	-1.16939	0.133474	0.522462	0.48241
YDR420W	HKR1	HKR1	U	0.497606	-0.636092	-0.365723	0.556093	-1.01871	0.103865
YDR421W	ARO80	ARO80	U	-1.12969	-0.225777	-0.375119	0.186563		0.744584
YDR421W	ARO80	ARO80	D	-1.34492	-0.452223	-0.705319	0.30173	-0.322427	0.468767
YDR421W	ARO80	ARO80	U	-1.87165	0.480862	-0.903972	1.28455	-0.719405	0.857191
YDR422C	SIP1	SIP1	D	-0.976739	0.0896346	-0.412131	0.208111	-0.936718	0.15513
YDR423C	CAD1	CAD1	D	0.485094	0.911655	0.560968	-0.0618487	0.102799	0.463497
YDR423C	CAD1	CAD1	U	0.109044	-0.585441	-0.15507	-0.603292	0.3186	0.50148
YDR424C	DYN2	DYN2	D	0.118303	0.40685	0.55766	-0.0662301	-0.112611	0.669334
YDR424C	DYN2	DYN2	U	0.0288956	-0.0352573	-0.029313	0.371981	-0.21076	0.231142
YDR425W	SNX41	SNX41	D	-2.57261	1.57373	0.348925	-0.0134778	-0.307785	0.696743
YDR425W	SNX41	SNX41	U	-1.61695	-0.555511	-0.231391	-0.202848	0.206688	0.422419
YDR426C	0	YDR426C	D	-0.729691	0.30378	0.646633		1.0577	0.599932
YDR426C	0	YDR426C	U	-2.14285	-1.22483	-1.17741	0.0871914	-1.10329	0.714045
YDR428C	0	YDR428C	D	-1.05904	1.60378	0.674444	0.180182	1.46218	0.175295
YDR428C	0	YDR428C	D	0.349143	0.134869	1.33643	0.980606	1.90677	0.483192
YDR428C	0	YDR428C	U	-0.106106	0.656574	0.237177	0.463995	0.0135289	0.0466076
YDR430C	CYM1	CYM1	D	0.0816429	-1.01954	-0.296798	0.420006	0.108639	0.293428
YDR430C	CYM1	CYM1	U	1.70881	0.613327	0.466059	2.31841	0.547546	0.860787
YDR431W	0	YDR431W	U	-0.752883	-0.189077	0.338382		0.213471	0.516678
YDR431W	0	YDR431W	D	-0.381852	-2.1028	-0.844237	-0.146848	-0.298055	-0.79606
YDR435C	PPM1	PPM1	D	-1.45374	-0.716379	-1.46892	0.725345	-0.817897
YDR435C	PPM1	PPM1	U	0.335844	-1.72001	-1.86652	-1.01218	-2.98813	-2.14789
YDR436W	PPZ2	PPZ2	D	-0.811958	-0.725233	-0.305562	0.344336	-0.365775	0.760887
YDR436W	PPZ2	PPZ2	U	-0.350085	0.164807	0.0879694	0.388459	0.377192	-0.413255
YDR438W	0	YDR438W	D	-0.199688	-0.218111	0.284879	-0.334789	-0.272616	0.295439
YDR438W	0	YDR438W	U	-1.0501	-0.717712	-0.618034	-0.097755	-0.13874	-0.748592
YDR440W	DOT1	DOT1	D	0.104067	-0.223194	-0.285748	-0.582794	0.57265	-0.438246
YDR440W	DOT1	DOT1	U	0.391756	0.13012	0.482983	0.0790781	0.166009	-0.258944
YDR441C	APT2	APT2	D	-2.12938	-0.841644	0.0996804	-0.667506	0.55606	0.306327
YDR442W	0	YDR442W	U	-1.34503	-1.14243	-4.36623
YDR444W	0	YDR444W	D	-0.339915	-0.755801	0.129694	-0.378064	-1.03158	-0.0803521
YDR444W	0	YDR444W	U	-1.07129	-0.799547	-0.793075	0.749404	-0.176671	0.246516
YDR445C	0	YDR445C	D	0.347144	0.559848	-0.456158	0.33888	-0.706782	-0.153945
YDR445C	0	YDR445C	D	-0.157084	0.356723	-0.0410853	-0.560793	0.096967	-0.91671
YDR445C	0	YDR445C	U	0.0192038	0.450715	-0.663688	0.307551	0.371634	-0.0318943
YDR446W	ECM11	ECM11	D	0.209091	-1.30816	-0.324549	0.080205	-0.235216
YDR452W	PPN1	PPN1	D	-0.772341	-0.697353	-0.190896	-1.07295	-0.55015	0.745339
YDR453C	TSA2	TSA2	D	-0.138396		-1.72459		0.969497	-0.168439
YDR458C	0	YDR458C	U	-0.86814	-0.750503	0.396865	0.336814	-0.468137	-0.125973
YDR459C	PFA5	PFA5	D	-0.042631		0.237417		1.87148	0.56457
YDR459C	PFA5	PFA5	U	0.845835	1.60669	0.436481	1.14498	0.632303	0.807148
YDR461W	MFA1	MFA1	D	-0.312178	-0.980498	0.094995	-0.463711	-0.0652551	0.556428
YDR461W	MFA1	MFA1	U	0.328475	-0.703541	0.289421	1.46793	0.0615183	0.129685
YDR465C	RMT2	RMT2	D	-0.37833	0.260102	-0.466345	0.859896	-0.386415
YDR466W	PKH3	PKH3	D	0.161305	0.308373	0.365439	0.973698	-0.873241	0.660235
YDR466W	PKH3	PKH3	U	1.06513	0.455688	-0.28577	0.364683	0.386173	-0.61827
YDR467C	0	YDR467C	D	0.588995	0.946248	0.536682	0.027343	-0.700535	-0.675018
YDR474C	0	YDR474C	D	-0.211266	-0.549348	0.326982	0.150289	0.913952	-0.561909
YDR476C	0	YDR476C	D	-0.0377605	-0.00677405	-0.339082	-0.0559461	1.36812	-0.958966
YDR476C	0	YDR476C	U	0.658951	0.444629	0.69548	0.710326	1.64421	0.315457
YDR479C	PEX29	PEX29	U	0.877089	1.71773	-0.151621	0.51566	0.0254417	-0.428602
YDR480W	DIG2	DIG2	D	-0.557831	-0.572216	0.44754	-0.296427	0.0971088	0.579518
YDR480W	DIG2	DIG2	U	0.882693	0.946333	0.648474	-0.759206	0.569355	0.590296
YDR481C	PHO8	PHO8	D	-0.0943739		-1.60003	0.121054	-0.482485	0.555604
YDR481C	PHO8	PHO8	U	-0.640176	0.772263	0.168244	0.160148	0.264212	-0.181798
YDR482C	CWC21	CWC21	U	-0.0253573	0.604872	0.728443	0.2971	0.741685	0.0624999
YDR483W	KRE2	KRE2	U	-1.80628	-1.95176	-2.22868	0.358037	-0.675548	-0.112558
YDR486C	VPS60	VPS60	D	-1.16308		-0.000831708	-2.30461	-0.102096	-0.404152
YDR486C	VPS60	VPS60	U	0.197805	-1.21325	0.345404	-0.649793	0.280411	-0.17247
YDR488C	PAC11	PAC11	D	-2.24667	0.625013	-0.25113		-1.00388	-0.948099
YDR488C	PAC11	PAC11	U	-0.308542	0.654282	-0.885347	-2.23694	0.0994839	-0.187486
YDR490C	PKH1	PKH1	D	0.0174642	-1.40238	-0.166837	-0.276259	-0.0453803	0.158137
YDR490C	PKH1	PKH1	U	1.09259	0.907959	1.00167	-0.176307	1.41957	0.432144
YDR491C	0	YDR491C	D	-0.646489	0.319136	0.948324	0.64384	0.0137331	-0.983821
YDR491C	0	YDR491C	U	0.292512	-0.22803	0.371838	-0.288733	-0.0353432	0.0109937
YDR492W	IZH1	IZH1	D	-2.6352	-0.764545	-2.26724	0.856951	-2.00508	-0.100139
YDR492W	IZH1	IZH1	U	1.04709	0.635314	1.08967	0.613993	1.19835	0.108955
YDR493W	FMP36	FMP36	D	0.344886	1.25312	1.31703	1.88447	1.0304	-0.858937
YDR493W	FMP36	FMP36	U	-0.281464	0.0528552	-0.0625289	1.01997	0.17257	0.162463
YDR494W	RSM28	RSM28	U	0.646726		-3.25134		0.143347
YDR497C	ITR1	ITR1	D	-0.279406	0.442119	-0.386335	-0.489173	-0.550992	-1.2086
YDR497C	ITR1	ITR1	U	-0.171588	0.0197544	-1.12894	-0.970927	0.389069	-0.70922
YDR501W	PLM2	PLM2	D	-1.3556	1.64615	-0.575524	-0.798001	1.32867	-0.312056
YDR501W	PLM2	PLM2	U	0.0336597	0.410274	0.691239	-0.424003	-0.175749	-0.473872
YDR502C	SAM2	SAM2	D	0.527894	-0.261021	0.576494	-0.0955987	-0.468478	-0.0791401
YDR502C	SAM2	SAM2	U	-0.0378067	0.390706	0.877839	-0.21158	0.338326	0.29341
YDR503C	LPP1	LPP1	D	0.344003	-0.297169	-0.69226	-0.37562	-0.352567	0.0315743
YDR503C	LPP1	LPP1	U	0.915641	-0.183602	-0.782468	0.740011	1.23698	-0.65446
YDR504C	SPG3	SPG3	U			1.48212	0.0493476	0.699928
YDR504C	SPG3	SPG3	D	0.0557976	-0.648288	1.12185	-0.293676	0.97912	-0.251619
YDR504C	SPG3	SPG3	U	-0.357172	-0.0219429	-0.113865	-0.890632	-0.66204	0.885461
YDR505C	PSP1	PSP1	D	-2.45859	-1.24349	-0.469182	0.0571128	0.55791	0.394104
YDR505C	PSP1	PSP1	U	-0.407954	-0.689791	0.559202	-0.120247	-0.202807	0.313366
YDR506C	0	YDR506C	D	0.263516	0.138071	-0.280141	0.649066	-0.300338	0.577492
YDR506C	0	YDR506C	D	1.45851	1.13674	0.57662	1.19515	0.978038	0.692346
YDR506C	0	YDR506C	U	-0.565227	-0.62891	0.174269	0.366564	-0.780621	0.26535
YDR507C	GIN4	GIN4	D	-1.8716	-1.06787	-1.20655		-0.887964
YDR508C	GNP1	GNP1	U	0.576797	-0.295833	-0.758525	-0.441042	-0.394909	-0.470626
YDR509W	0	YDR509W	D	-1.27	1.15659	-0.185675	-1.5049	0.364108	-0.379038
YDR509W	0	YDR509W	U	-0.535187	-0.0396428	-0.666089	0.00498019	0.547164	0.0417648
YDR511W	ACN9	ACN9	D	1.15897	-0.696908	0.677041	1.1801	-1.06169	0.178401
YDR511W	ACN9	ACN9	U	0.455221	-0.378508	0.902092	-0.671037	0.122682	-0.288231
YDR513W	GRX2	GRX2	D	0.115047	-0.72848	0.584054	0.0221258	0.608336	-0.254171
YDR513W	GRX2	GRX2	U	-0.327791	1.08376	-0.54383	-0.572132	0.872921	-0.667452
YDR514C	0	YDR514C	D	0.306096		0.621294		-0.130173	0.327828
YDR514C	0	YDR514C	U	-0.621649	-0.486979	-0.24804	-0.0186683	0.106194	-0.221928
YDR515W	SLF1	SLF1	D	0.881121	-0.67345	0.661268	0.0832574	0.504236	0.434893
YDR515W	SLF1	SLF1	U	0.12344	1.29491	-0.147669	0.6319	0.101565	-0.171455
YDR517W	GRH1	GRH1	D	-0.367716	-0.286136	-0.442724	-0.521214	0.231173	-0.0694398
YDR519W	FPR2	FPR2	U	0.044733	0.693565	-0.046852	0.546973	0.892688
YDR519W	FPR2	FPR2	D	0.0149202	0.387094	-0.752164	1.05755	0.381368	0.977231
YDR520C	0	YDR520C	U	-3.61873	-0.365078	-2.80554	-4.64545	-1.57766
YDR520C	0	YDR520C	D	-0.3854	0.198993	0.368992	-0.838188	-0.199926	0.49835
YDR522C	SPS2	SPS2	D	-0.658483	-0.0620344	0.533907	0.125315	0.240613	-0.192308
YDR522C	SPS2	SPS2	U	0.0727967	-0.672235	0.180261	-0.292333	-0.167537	0.23012
YDR523C	SPS1	SPS1	D	0.503648	1.33829	-0.511151	-0.746452	0.524833	0.0865225
YDR523C	SPS1	SPS1	U	-0.0621148	0.834917	0.62787	0.422304	0.274409	0.0481408
YDR524C	AGE1	AGE1	U	-0.163422		0.911773	-1.16492	1.51806	0.0360037
YDR524C	AGE1	AGE1	D	0.0359149	0.135011	1.44485	0.279132	0.546103	-0.926002
YDR525W-A	SNA2	SNA2	D	-0.437525	-1.57041	-1.35056	0.374965	0.148573	-0.261016
YDR525W-A	SNA2	SNA2	D	-0.987608	-0.581309	-1.44491	0.303726	0.640956	-0.870976
YDR525W-A	SNA2	SNA2	U	-0.84804	-1.05375	-0.741041	-1.25086	-0.326661	-0.323686
YDR528W	HLR1	HLR1	D	-0.0587041	0.0190067	-1.48543		0.356951	-0.620009
YDR530C	APA2	APA2	U	0.767526	0.805911	-0.520564		-0.558233	-0.0540738
YDR530C	APA2	APA2	D	0.592697	-0.797123	-0.612008	-0.0704504	-0.0531624	-0.622068
YDR534C	FIT1	FIT1	U	0.157736	0.378583		-0.748113	0.25883	0.360218
YDR534C	FIT1	FIT1	D	-0.494726	-1.36074	-0.422794	0.37758	0.588819	0.370783
YDR535C	0	YDR535C	D	0.162601	-1.07235	-0.448518	-0.0342186	-0.0963787	-0.0864137
YDR535C	0	YDR535C	U	0.00129825	-0.000914154	-0.967172	-0.773771	-0.41845	0.292586
YDR537C	0	YDR537C	D	0.0864786	-0.571694	0.644471	1.15214	-0.120152	-0.183029
YDR537C	0	YDR537C	U	0.210946	-0.104881	0.404822	0.151939	-0.162345	0.560641
YDR538W	PAD1	PAD1	U	0.357977	0.0197285	-0.185722	0.305055	-0.268482	1.35825
YDR539W	0	YDR539W	D	-0.53099	-0.678092	-0.193027	0.459753	-0.0208588	0.162347
YDR539W	0	YDR539W	U	0.315953	-0.756418	0.122657	-0.404446	0.247878	0.0825333
YDR541C	0	YDR541C	D	-1.49846	-0.420911	-0.846151	0.188748	-0.0506455	-0.540122
YDR541C	0	YDR541C	U	0.370168	0.255562	0.631754	0.249528	0.378062	-0.383282
YEL001C	0	YEL001C	D	0.000578826	0.123795	-0.456775	-0.355869	0.396536	-0.215264
YEL001C	0	YEL001C	U	-0.471406	-0.500068	-0.0925702	-0.535303	-0.212302	-0.109514
YEL004W	YEA4	YEA4	D	0.290851	1.26191	0.454097	-0.50036	-0.409414	0.0527131
YEL004W	YEA4	YEA4	U	0.179578	1.62595	-0.493087	-0.0139114	0.202277	-0.224152
YEL005C	VAB2	VAB2	D	1.01932	-0.460275	0.11521	-0.882308	1.29422	-0.996099
YEL005C	VAB2	VAB2	U	0.470485	1.98871	0.13983	-0.264366	0.403636	-0.699691
YEL006W	YEA6	YEA6	U	-0.803032	-0.0714039	-0.229728	-1.85386	0.462453	-0.364453
YEL007W	0	YEL007W	D	-0.303607	0.671582	-0.753159	-0.493879	2.30799	1.12244
YEL008W	0	YEL008W	D	0.325787	0.261457	0.626944	-0.615728	-0.385643	0.207866
YEL008W	0	YEL008W	U	-0.0467365	0.143184	-0.977982	-0.320382	0.0358042	-0.626073
YEL009C	GCN4	GCN4	U	-3.02619				-0.644861	-4.89856
YEL010W	0	YEL010W	D	0.0150831	-0.449254	0.276792	0.186058	0.682641	-0.0527097
YEL010W	0	YEL010W	U	-0.044994	-0.288517	-0.867971	-1.15682	-0.205054	-0.433695
YEL011W	GLC3	GLC3	D	-0.453502	0.0401043	-0.255199	-0.916147	-0.237559	-0.795651
YEL011W	GLC3	GLC3	U	0.258248	0.500981	0.508725	0.117293	-0.0372854	-0.401375
YEL012W	UBC8	UBC8	D	-1.50731	-0.29648	-0.401374	2.92664	-0.936836	3.5008
YEL012W	UBC8	UBC8	U	-1.55696	0.363899	-0.100087	-0.133291	-0.284195	-0.977599
YEL013W	VAC8	VAC8	U	-0.84084		-0.162993	-3.19619	2.80587
YEL014C	0	YEL014C	D	-0.180166	-0.107451	-0.32812	-0.651678	-1.15991	-0.272681
YEL014C	0	YEL014C	U	-0.952011	-0.538098	0.226704	0.127422	0.121158	-0.0800151
YEL015W	EDC3	EDC3	U	-1.68766		1.1172		-0.709802
YEL015W	EDC3	EDC3	D	0.0736558	0.267097	-0.0308058	-0.0236354	0.655328	-0.6369
YEL016C	NPP2	NPP2	D	-0.140956	0.928641	-0.491429	0.0467945	0.100665	-0.157636
YEL016C	NPP2	NPP2	U	0.00260791	-0.743589	-0.296768	-0.316771	-0.238358	0.17141
YEL017C-A	PMP2	PMP2	U	-0.743142		-0.169363		-0.518591
YEL017C-A	PMP2	PMP2	U	-0.530704	-0.973521	0.0731301	-0.798061	-0.571292
YEL017C-A	PMP2	PMP2	D	1.03662	0.341081	-0.251561	-0.44415	-0.188699	-0.331041
YEL017W	GTT3	GTT3	D	-0.176172	0.36381	0.545262		0.443403	0.104012
YEL017W	GTT3	GTT3	U	-0.379225	0.663316	-0.198217	-1.47031	0.838082	0.534632
YEL018W	EAF5	EAF5	D	-0.245162	0.463713	1.38745		0.905431	0.829092
YEL018W	EAF5	EAF5	U	-0.247807	0.270002	0.328385	-0.227858	-0.00460933	1.06713
YEL020C	0	YEL020C	D	0.217045	0.076263	0.437027	-0.517561	1.06787	0.237909
YEL020C	0	YEL020C	U	0.268711	-1.57769	0.268611	1.33801	0.0785716	0.766573
YEL023C	0	YEL023C	U	-0.773848	-1.11609	-0.590685	-0.490696	0.983107
YEL023C	0	YEL023C	D	-1.3183	-0.74345	-0.24466	0.477416	0.542633	-0.190271
YEL025C	0	YEL025C	D	0.700391	0.352613	0.960137	-0.231501	0.276666	-0.652823
YEL025C	0	YEL025C	U	-0.290223	-0.271719	-0.319329	-0.184526	0.208408	-0.285074
YEL028W	0	YEL028W	U	-0.361079	-0.192515	-0.289125	0.1997	-0.141	0.214462
YEL029C	BUD16	BUD16	U	1.89514	2.86417	1.41772			-1.07702
YEL030W	ECM10	ECM10	U	0.418176	0.318763	0.354335	0.182993	0.698117	0.79694
YEL030W	ECM10	ECM10	U	-0.0710228	0.198416	0.546537	-0.172553	0.220857	0.566743
YEL037C	RAD23	RAD23	D	1.48433	-0.223855	0.257743	0.464518	0.566791	-0.390041
YEL037C	RAD23	RAD23	U	0.145133	0.662491	-0.296306	0.727712	0.815399	0.0992132
YEL038W	UTR4	UTR4	D	0.385994	-1.62133	0.593539	-0.157658	-0.0323122	-1.37627
YEL038W	UTR4	UTR4	U	1.0123	-0.254249	0.778578	0.291334	1.00298	0.500353
YEL039C	CYC7	CYC7	D	0.756763	-0.181669	0.471209	0.0122992	0.619874	-0.309046
YEL039C	CYC7	CYC7	U	0.0185433	-0.364195	0.223315	-0.67954	0.279104	0.531374
YEL040W	UTR2	UTR2	U	0.2897	-0.079866	-0.146923	-0.0589788	1.0027	-0.15986
YEL041W	YEF1	YEF1	D	-0.264567	-0.111001	0.794035	2.64818	0.607626	1.55779
YEL041W	YEF1	YEF1	U	-1.12003	0.464036	-0.458227	0.112031	-0.172021	-0.473268
YEL042W	GDA1	GDA1	D	1.36631	-2.94493	1.20495	-0.215384	0.432545	-0.458807
YEL042W	GDA1	GDA1	U	0.146261	1.24864	0.876341	0.460755	-3.19534	-0.80098
YEL043W	0	YEL043W	U	0.137826			0.247271	1.38104
YEL043W	0	YEL043W	D	0.687305	-2.81984	0.942332		0.389407
YEL047C	0	YEL047C	D	0.0626032	0.115259	0.00435459	-0.451812	0.240946	-0.00372264
YEL047C	0	YEL047C	U	0.457545	0.124633	0.335477	0.782284	0.124642	-0.0836629
YEL048C	0	YEL048C	D	0.14875	-1.27866	-0.00145031	-0.866503	-0.645744	0.956525
YEL048C	0	YEL048C	U	0.487024	-1.48611	0.70637	-0.383112	-0.522581	0.700931
YEL049W	PAU2	PAU2	D	-0.189407	0.807158	-0.182018	-0.5039	-0.0143928	-0.29439
YEL049W	PAU2	PAU2	U	-0.127274	0.238434	-0.152755	-0.360941	0.562069	0.177982
YEL052W	AFG1	AFG1	D	3.58676		0.226775		0.560551
YEL052W	AFG1	AFG1	D	0.993434	-0.459561	0.041822	0.147838	0.88293	-0.0953865
YEL052W	AFG1	AFG1	U	0.719932	0.18231	-0.106181	-0.647846	0.692888	-0.598251
YEL053C	MAK10	MAK10	D	0.820592	-0.818896	-0.496686	0.599223	-0.665188	-0.853911
YEL053C	MAK10	MAK10	U	-1.09011	-2.35138	-1.10231	1.11791	-1.92498	0.0231485
YEL056W	HAT2	HAT2	D	-4.02796	-1.49459	-3.66063	-0.204478	-1.44103	-1.18061
YEL056W	HAT2	HAT2	U	-0.237454	0.0408915	-0.515368	-0.109576	0.713932	-0.424734
YEL057C	0	YEL057C	D	0.020376	-0.0214548	0.071798	-0.129324	0.281081	0.61698
YEL059W	0	YEL059W	D	0.425377	-0.683087	0.18326	0.00556772	0.196475	-1.02974
YEL059W	0	YEL059W	U	0.267244	-0.109548	-0.540285	-0.0617759	-0.658725	0.627221
YEL060C	PRB1	PRB1	D	0.216552	-0.783137	-0.254477	-0.619478	-0.295279	-0.185913
YEL060C	PRB1	PRB1	U	-0.891523	0.702527	-0.95453	-1.02488	0.577006	-0.484433
YEL062W	NPR2	NPR2	U	0.70636	-3.87304	-0.946877		-0.500889	-4.52172
YEL062W	NPR2	NPR2	D	1.36754	-1.41085	-0.123692	-0.517463	-1.79608	-2.38684
YEL063C	CAN1	CAN1	D	1.29041	-0.505982	0.254745	-0.361294	1.27901	0.862734
YEL063C	CAN1	CAN1	U	0.308234	-0.0589597	0.587222	0.21981	-0.145914	0.263344
YEL064C	AVT2	AVT2	D	0.246753	0.448196	-0.185421	-0.446414	1.06528	-0.081324
YEL064C	AVT2	AVT2	U	-0.526915	0.476133	-0.741845	-0.695631	-1.02444	0.111759
YEL065W	SIT1	SIT1	D	-0.241379	-0.222644	0.0778953	-1.16011	-0.666619	-0.609629
YEL065W	SIT1	SIT1	U	-0.132042	-0.47972	0.0452009	-0.977292	-0.269067	-0.340121
YEL066W	HPA3	HPA3	D	-0.357783	-0.0729122	-0.144804	-0.102951	0.601542	-0.262791
YEL066W	HPA3	HPA3	U	-0.0151195	0.378554	-0.372275	0.254127	0.00384032	0.917743
YEL067C	0	YEL067C	D	-0.619482	-1.1623	-0.313317	-0.957785	0.201952	-0.124953
YEL067C	0	YEL067C	U	-0.14977	0.100315	-0.592252	0.258232	-0.576954	0.0454945
YEL068C	0	YEL068C	D	0.213832	0.347467	0.386096	0.535498	0.482358	0.77247
YEL068C	0	YEL068C	U	0.330544	-0.205967	0.00546299	-0.219124	-0.184951	0.315578
YEL071W	DLD3	DLD3	D	0.217547	0.011757	-0.837755	-0.36363	0.993684	0.594977
YEL071W	DLD3	DLD3	U	0.341778	0.156215	0.61277	-0.0862347	0.685162	0.143398
YER001W	MNN1	MNN1	D	1.10696	-0.802162	1.20534	0.56091	1.05346	-0.0918833
YER001W	MNN1	MNN1	U	0.202001	0.608495	-0.0844371	0.3269	-0.451968	0.133875
YER002W	NOP16	NOP16	U	-1.37415	-0.381371	0.00181978	0.438976	-1.36613	0.499648
YER005W	YND1	YND1	D	1.30437	0.748205	0.309709	1.0899	0.777241	-0.128114
YER005W	YND1	YND1	U	0.576697	0.289458	-0.375146	-0.0154119	0.0107806	-0.532706
YER007C-A	TMA20	TMA20	D	-0.149319	0.557316	0.4733	-0.914958	0.979112	0.0107318
YER007C-A	TMA20	TMA20	U	0.0957646	1.11282	0.546911	-0.240044	-0.493459	1.08431
YER007W	PAC2	PAC2	U	-0.648821		-1.3903	-1.38892	0.300587	-1.16675
YER007W	PAC2	PAC2	D	0.31622	1.2352	0.817187	-0.441426	0.362299	-0.395071
YER011W	TIR1	TIR1	U	0.162997	0.41254	0.0200189	-0.0398117	-0.02734	0.301486
YER019C-A	SBH2	SBH2	D	1.72557	1.40779	1.40558	0.433615	0.925103	1.16122
YER019C-A	SBH2	SBH2	U	0.770464	0.634493	0.497464	1.50386	-0.0332276	1.20983
YER020W	GPA2	GPA2	D	0.0810593	1.7147	0.149679	-0.60171	1.07797	-1.51088
YER020W	GPA2	GPA2	U	-1.07887	3.36715	1.57469	-0.767272	2.1794	-0.756933
YER024W	YAT2	YAT2	D	-0.297204	-0.203039	0.450259	-0.206791	-0.258826	0.0727769
YER024W	YAT2	YAT2	U	-0.304975	0.014664	0.17102	-0.10202	-0.491266	0.264384
YER027C	GAL83	GAL83	D	-1.07611	0.848745	0.53362	-0.728194	0.307671	-1.08847
YER027C	GAL83	GAL83	U	-0.126507	-0.269159	-0.136222	-0.443638	0.0498035	-0.456265
YER028C	MIG3	MIG3	D	-0.567117	0.0881566	-0.888885	-0.667122	-0.285742	0.499897
YER028C	MIG3	MIG3	U	-0.344313	0.253221	-0.0131839	0.146182	0.308605	0.448227
YER030W	CHZ1	CHZ1	D	0.992874		0.321716	-0.50982	0.712748
YER030W	CHZ1	CHZ1	U	0.472623	-0.195441	-0.442251	0.17159	0.991668	-0.940949
YER031C	YPT31	YPT31	U	0.365368	0.717432	0.902013		-1.72103
YER032W	FIR1	FIR1	D	-0.0207479	-1.11089	0.729007	0.274635	0.0104271	-0.219237
YER032W	FIR1	FIR1	U	0.880648	-0.817378	-0.0916974	-0.160402	-0.630552	0.0606848
YER033C	ZRG8	ZRG8	D	0.256669	0.427879	0.59909	-0.507084	0.0553087	0.309401
YER033C	ZRG8	ZRG8	U	0.789527	-0.996969	-0.0478605	-0.793457	0.465149	-0.202789
YER034W	0	YER034W	U	0.558326	0.856209	0.275913	0.582936	0.907865
YER034W	0	YER034W	D	0.0921104	-0.882548	-0.110991	-1.03879	-1.01143	0.247882
YER037W	PHM8	PHM8	D	0.208579	-2.58935	-0.434832	-0.868392	0.494566	-0.935164
YER037W	PHM8	PHM8	U	0.339129	0.120979	-0.114509	0.16139	0.667277	0.16761
YER038W-A	FMP49	FMP49	D	0.975659	-0.300607	0.621635	-0.102376	0.973693	-0.441532
YER038W-A	FMP49	FMP49	U	-0.100467	0.0706091	0.370972	-0.15381	0.358637	-0.716918
YER039C	HVG1	HVG1	U	-0.262943	-0.253375	-1.50109		-0.753901	0.212279
YER039C	HVG1	HVG1	U	-1.5561	-1.09306	-1.3186		0.239368	0.464624
YER039C	HVG1	HVG1	D	1.21571	0.192581	0.143741	-0.639138	-0.311651	0.363484
YER039C-A	0	YER039C-A	D	0.190466	0.386653	-0.551471	-0.171005	0.0857221	0.499915
YER039C-A	0	YER039C-A	U	0.378512	-0.493975	0.181644	0.117359	0.71444	-0.264617
YER041W	YEN1	YEN1	D	0.576328	0.946907	-0.00904107	0.88602	-1.27282	-0.655826
YER041W	YEN1	YEN1	U	0.13367	-0.340895	-0.0213678	-0.237858	-0.82306	-0.0875641
YER042W	MXR1	MXR1	D	0.435592	-0.341847	0.362656	-0.435716	-0.312345	-0.587146
YER042W	MXR1	MXR1	U	-0.168105	-0.325515	-0.436363	0.1183	-0.145545	0.208877
YER044C-A	MEI4	MEI4	D	0.879496	0.0753605	0.330926	-0.437597	0.272368	-0.729554
YER044C-A	MEI4	MEI4	U	0.950205	-0.34276	0.267205	1.19905	0.620615	0.895501
YER045C	ACA1	ACA1	D	0.12049	0.00825225	-0.380553	0.160023	-0.720163	-0.0983114
YER045C	ACA1	ACA1	U	0.189443	-1.2418	0.375583	0.0639016	0.427932	0.207912
YER046W	SPO73	SPO73	D	1.41564	-0.49398	1.09734	0.630433	0.479073	-1.34068
YER046W	SPO73	SPO73	U	0.504662	0.339432	0.515568	-0.0356876	0.303188	-0.4222
YER046W-A	0	YER046W-A	D	0.336408	0.602068	0.223466	0.077213	0.196846	0.0551618
YER046W-A	0	YER046W-A	U	0.00315258	-0.0157096	0.0510779	0.599545	0.102868	0.578454
YER047C	SAP1	SAP1	D	0.557783	0.272333	0.429085	0.168504	0.515131	2.48993
YER047C	SAP1	SAP1	U	-3.25906	-0.373979	-1.34995	-1.99915	-2.77759	-1.8273
YER048C	CAJ1	CAJ1	D	0.392471	-0.346752	-0.0514944	0.202492	-0.164807	-0.43311
YER048C	CAJ1	CAJ1	U	-0.978725	0.259365	-1.37219	-1.77866	-0.512386	-0.813192
YER049W	TPA1	TPA1	D	0.864653	-2.08389	-0.015112	-0.257147	0.762397	-0.256873
YER049W	TPA1	TPA1	U	-0.0901046	-0.372365	0.204606	0.425828	-0.29933	0.322262
YER051W	JHD1	JHD1	D	0.180927	0.487563	1.09147	0.24906	0.148608	-0.789
YER053C	PIC2	PIC2	D	-0.690417	0.582576	-0.837434	-1.04553	0.0872031	0.252596
YER053C	PIC2	PIC2	U	0.00360261	0.807264	1.11742	-0.502203	1.30273	0.635014
YER055C	HIS1	HIS1	U	0.745801	-0.430164	0.639439	-0.452439	1.17595
YER055C	HIS1	HIS1	D	0.27643	-0.356265	-0.253859	-0.178554	-0.827897	0.430901
YER056C	FCY2	FCY2	D	0.0370075	0.747834	0.915901	-0.651269	1.33744	-0.822014
YER056C	FCY2	FCY2	U	0.163042	0.985724	0.0148869	-0.585525	1.56701	0.858281
YER056C-A	RPL34A	RPL34A	D	0.52187	0.559906	-0.637478	3.94065	0.918547	1.48668
YER056C-A	RPL34A	RPL34A	U	1.11172	0.819835	0.0120752	2.65026	0.69439	0.880306
YER057C	HMF1	HMF1	D	0.204739	0.217511	-1.00734	-0.0330025	1.52268	0.174894
YER057C	HMF1	HMF1	U	0.702503	1.00807	0.383123	-0.209724	0.880642	-0.400081
YER059W	PCL6	PCL6	D	0.751556	0.846654	-1.83217	-0.550953	-1.73128	-0.226871
YER059W	PCL6	PCL6	U	0.123171	0.303544	0.218476	-0.882443	1.80819	0.0011613
YER060W	FCY21	FCY21	D	0.28631	-1.69737	-0.420041	-0.0784237	0.200273	1.01005
YER060W	FCY21	FCY21	U	0.556845	0.0667523	-0.288349	0.714895	0.228907	-0.115428
YER060W-A	FCY22	FCY22	D	0.222469	-0.572965	-0.636641	-0.476102	0.325317	-0.144877
YER060W-A	FCY22	FCY22	U	-0.529032	-0.166387	-0.185924	-0.174637	-0.382621	-0.0402377
YER062C	HOR2	HOR2	D	-0.370738	0.38045	-0.272857	-0.494733	0.451992	0.127354
YER062C	HOR2	HOR2	U	-1.15987	0.185093	-0.558852	-0.388642	-0.430366	-0.387879
YER063W	THO1	THO1	U	-0.377616	-0.175062	-0.184015	0.184895	0.252984	-0.104189
YER064C	0	YER064C	D	0.996486	0.5802	0.375773	0.435073	0.792454	-0.00827898
YER064C	0	YER064C	U	-0.167467	-0.567181	-0.630738	-0.244359	-0.293956	-0.0183192
YER065C	ICL1	ICL1	D	0.726575	-0.52612	-1.03513	0.73868	0.745081	0.674834
YER065C	ICL1	ICL1	U	0.446748	0.421437	0.40084	1.24229	-0.158971	0.293196
YER066C-A	0	YER066C-A	D	0.242506	0.718082	0.400448	-0.33753	-1.18415	0.614163
YER066C-A	0	YER066C-A	U	-1.34843	-2.04168	-1.09144	-1.14625	-0.548309	1.23749
YER066W	0	YER066W	D	-0.0060645	0.632636	-0.722536	-0.363479	-0.244727	0.00342168
YER066W	0	YER066W	U	-0.271777	-0.823425	0.0847598	0.288898	-0.151378	-0.240817
YER067C-A	0	YER067C-A	D	-0.163418	0.365434	-0.0372729	-0.410042	0.179498	-0.048826
YER067C-A	0	YER067C-A	U	0.000468443	-0.969247	-0.0542365	-0.421705	-0.430577	0.152
YER067W	0	YER067W	D	-0.157712	0.476817	-0.702872	0.720891	0.417685	0.5292
YER067W	0	YER067W	U	-0.596901	-0.205985	-0.348338	-0.339863	-0.213961	-0.285246
YER071C	0	YER071C	D	0.288129	-0.187983	0.495397	0.131239	-0.07418	-0.376682
YER071C	0	YER071C	U	0.391622	0.490199	0.068804	-0.510486	0.188189	0.113825
YER072W	VTC1	VTC1	D	-0.806138	0.751887	0.0854029	-1.19814	-1.46032	0.202073
YER072W	VTC1	VTC1	U	-1.18895	-1.42477	0.154605	0.0270382	0.69363	1.22829
YER073W	ALD5	ALD5	D	0.724095	-2.35325	-0.083621	0.0241489	0.0878091	0.0709318
YER073W	ALD5	ALD5	U	-0.400145	-1.50222	-0.481966	0.53734	-1.06716	0.21301
YER075C	PTP3	PTP3	D	-0.420371	0.736847	-0.227912	-0.613855	-0.253567	-0.824813
YER075C	PTP3	PTP3	U	-0.2296	-0.282119	-0.379209	0.215577	-0.696898	0.447497
YER079W	0	YER079W	D	-0.215563	-0.0853834	-0.361472	-1.00857	0.687143	-0.182413
YER079W	0	YER079W	U	-0.338307	-1.15425	-0.705747	0.298272	0.424203	-0.0346592
YER080W	FMP29	FMP29	D	0.958181	0.374032	0.175855		-0.18289	0.41233
YER080W	FMP29	FMP29	U	0.657308	0.217507	1.02761	1.08512	0.607848	0.463591
YER081W	SER3	SER3	D	0.195439	0.734371	-0.147485	0.0779858	0.496738	-0.888287
YER081W	SER3	SER3	U	0.813118	1.02998	0.393995	0.095077	0.142258	0.0696438
YER084W	0	YER084W	U	-3.10543	-1.00641	-1.07016	0.0889363	-0.873127
YER085C	0	YER085C	D	0.86337	0.467942	0.602635	-0.19621	0.978756	-0.474479
YER085C	0	YER085C	U	-0.224399	-0.270059	0.891169	0.160912	-0.222364	0.311071
YER087C-A	0	YER087C-A	D	0.270815	1.09232	-0.165892	0.102161	0.00554632	-0.721116
YER087C-A	0	YER087C-A	U	1.83442	1.08515	1.89497	1.11164	1.07521	1.87127
YER088C	DOT6	DOT6	D	0.761913	0.72092	0.950661	0.688346	0.28764	1.35228
YER088C	DOT6	DOT6	U	0.259445	0.894926	-0.292605	0.330067	0.481176	1.29575
YER089C	PTC2	PTC2	D	0.961748	0.454526	0.683404	-0.0332189	0.130442	-0.136622
YER089C	PTC2	PTC2	U	0.220103	1.09407	0.0163245	0.401741	-0.102236	0.0692878
YER091C-A	0	YER091C-A	D	-1.14012	1.09645	-1.3951	-1.25699	0.612314	-1.48643
YER092W	IES5	IES5	D	-1.71472	-2.71438	-2.58022	-1.89771	-3.65624	-2.95972
YER092W	IES5	IES5	U	-0.499993	1.11005	-0.0497507	-2.81417	-1.202	-4.34697
YER093C-A	0	YER093C-A	D	1.03455	-0.346621	-1.39809	1.26492	-0.637614	-0.925036
YER093C-A	0	YER093C-A	U	0.690249	0.330259	0.720794	0.384556	-0.0384186	-0.154271
YER096W	SHC1	SHC1	D	0.175428	-0.0359778	-0.166826	-0.222323	0.0639697	0.16403
YER096W	SHC1	SHC1	U	-0.065289	-0.0105767	-0.130354	-0.490884	-0.0934897	0.0695809
YER097W	0	YER097W	D	0.296189	0.826734	0.024697	0.197341	0.0737157	-0.231399
YER097W	0	YER097W	U	0.0615861	-0.348158	-0.0066998	0.444024	-0.233221	0.0516572
YER098W	UBP9	UBP9	D	-0.313977	-0.0817047	0.728347	0.253623	-0.357299	-0.459191
YER098W	UBP9	UBP9	U	-0.07049	0.0694911	0.0113931	-0.904599	0.517006	0.077517
YER101C	AST2	AST2	D	-0.761906	0.432555	-0.555541	0.333214	-0.791693	-0.217982
YER101C	AST2	AST2	U	-0.0142901	-0.985619	-0.889488	-0.502596	0.264902	0.607079
YER103W	SSA4	SSA4	D	0.698444	-0.0778643	0.898778	0.865999	1.65304	0.101891
YER103W	SSA4	SSA4	U	0.94222	0.356173	1.12184	0.0933043	1.00266	1.05328
YER106W	MAM1	MAM1	U	-0.247691	0.896688	0.169956		1.28853	1.0191
YER108C	0	YER108C	D	-0.345055	-0.0298764	-0.0339591	0.463434	-0.479358	0.466902
YER108C	0	YER108C	U	0.122055	-0.113229	-0.419258	0.606088	-0.0774487	0.942488
YER109C	FLO8	FLO8	D	-0.366792	-0.00719739	0.201986	0.227451	1.35901	-0.560994
YER109C	FLO8	FLO8	U	0.414019	0.625361	0.108939	0.357959	0.437294	0.411345
YER113C	0	YER113C	D	0.297426	0.243825	0.242436	-0.0255489	-0.882873	-0.313176
YER113C	0	YER113C	U	0.0956987	-1.27947	0.524586	1.44549	-0.0587739	0.537764
YER114C	BOI2	BOI2	D	-0.0747702	0.446792	0.0697368	-0.102647	-0.206157	0.353353
YER114C	BOI2	BOI2	U	-0.645948	-1.27233	-1.00034	0.93919	-1.23078	0.990048
YER115C	SPR6	SPR6	D	-0.326021	0.178316	-0.134864	0.11056	0.194618	1.06946
YER115C	SPR6	SPR6	U	-0.918323	-0.643525	0.294446	0.0646148	-0.0647299	0.691837
YER118C	SHO1	SHO1	D	-0.68025	-0.281881	-0.162867	-0.799861	-1.16348	-1.35225
YER118C	SHO1	SHO1	U	-0.323771	-1.23952	-1.89876	-0.247882	-0.960925	-0.620648
YER119C	AVT6	AVT6	D	-0.282687	0.327511	1.1879	-0.315616	0.374528	-0.697788
YER119C	AVT6	AVT6	U	-0.920544	0.785913	-0.583891	-0.00454911	-0.598302	0.0441424
YER119C-A	0	YER119C-A	D	-2.76377	-3.34426	-2.31825	-3.57745	-6.65264	-6.34819
YER120W	SCS2	SCS2	D	-2.59542		-5.31334	-5.64132		-6.09274
YER120W	SCS2	SCS2	U	-2.93675	-2.41276	-3.7534	-5.08862	-6.80752	-8.74131
YER121W	0	YER121W	D	-0.527057	0.851418	-0.0723982		-0.426729	0.813258
YER121W	0	YER121W	U	-0.750784	0.209612	-0.205373	0.104809	0.512642	0.250478
YER124C	DSE1	DSE1	U	-0.914722		-0.170227	0.890156	-1.40536
YER124C	DSE1	DSE1	D	0.747454	0.71587	-0.623092	0.420346	1.0073	-0.533727
YER128W	0	YER128W	D	-0.0046331	0.32748	0.611205	4.67927e-05	0.0343684	-0.81979
YER128W	0	YER128W	U	0.384584	0.700006	-0.0719267	0.00969835	0.0832616	0.613615
YER128W	0	YER128W	U	0.472089	-1.253	0.386134	0.736116	-0.0251487	-0.257675
YER129W	SAK1	SAK1	U	-0.6908	0.744788	-0.398333		1.15939
YER129W	SAK1	SAK1	D	-0.311909	0.271248	-0.305682	0.0420353	-0.614675	-1.01451
YER130C	0	YER130C	D	0.733941	0.977322	-0.00493415	-0.0962244	0.444875	-0.286758
YER130C	0	YER130C	U	-0.0895453	-0.679673	0.178269	-0.23598	-0.604084	0.517453
YER132C	PMD1	PMD1	D	-1.05823	0.0532759	-0.0277826	-0.459597	-0.145029	0.756493
YER132C	PMD1	PMD1	U	0.255725	0.346157	0.861187	-0.845072	0.434353	2.2777
YER134C	0	YER134C	U	0.908874		-0.0534975		1.11945
YER134C	0	YER134C	D	-0.0202648	-0.480475	-0.0403326	-0.642792	0.776209	0.176793
YER134C	0	YER134C	U	0.879396	0.55636	-0.124509	0.265425	0.363657	0.176646
YER135C	0	YER135C	D	3.13366	3.1646	0.888348	2.91411	0.239376	1.46906
YER135C	0	YER135C	D	0.463621	0.0198488	0.0741288	1.93647	-0.193085	0.156025
YER135C	0	YER135C	U	0.492111	1.02321	-0.0414541	1.14172	-0.0458591	0.741619
YER137C	0	YER137C	D	0.891049	-1.20445	1.8156	-0.174336	2.00206	-0.16528
YER137C	0	YER137C	U	0.409169	1.20171	-0.187889	1.04568	-1.61182	0.644516
YER140W	0	YER140W	D	-0.0825101	-1.55916	-1.46333	-0.403981	0.490499	-0.108341
YER140W	0	YER140W	U	0.0918734	1.23478	0.179662	-0.100967	-0.116415	0.0444372
YER141W	COX15	COX15	U	0.0789589		1.25519		0.156264
YER142C	MAG1	MAG1	D	1.03582	-1.25297	0.276456	1.02274	0.453199
YER142C	MAG1	MAG1	D	-0.386225	-0.648241	-0.803254	0.625253	-0.248193	0.673967
YER142C	MAG1	MAG1	U	-0.505308	-0.41607	-0.209609	-0.404934	-0.115964	-0.399656
YER143W	DDI1	DDI1	D	-0.0431063	-0.275475	0.0768062	0.0455896	0.149531	0.199467
YER143W	DDI1	DDI1	U	0.374668	0.522816	0.0971139	0.091461	-0.150439	-0.0618686
YER144C	UBP5	UBP5	D	1.26106	-1.20069	1.21367	1.20277	0.104167	-0.0925323
YER144C	UBP5	UBP5	U	0.178094	-0.0747113	-0.44052	0.286731	-0.103346	-0.0738661
YER145C	FTR1	FTR1	D	0.953984	0.31302	-0.242481	0.079748	0.869786	-0.160076
YER145C	FTR1	FTR1	U	-0.574759	0.0874764	-0.0611783	0.457173	-1.00832	0.636441
YER149C	PEA2	PEA2	D	-1.05898	-1.42007	0.123519	0.355483	0.0953538	0.450644
YER149C	PEA2	PEA2	U	0.714379	0.423173	1.04502	-0.211515	0.547108	0.390846
YER150W	SPI1	SPI1	D	-0.680816	0.245357	-0.586914	0.12909	0.233174	-0.287451
YER150W	SPI1	SPI1	U	-1.0856	-0.576039	-1.23584	-0.376166	-0.661299	-0.686593
YER152C	0	YER152C	D	-0.135303	0.722563	0.750546	0.574671	-0.642223	-1.20602
YER152C	0	YER152C	U	0.114111	-1.36712	-0.0122945	0.3943	0.578797	-0.229586
YER158C	0	YER158C	D	1.03195	-0.798414	1.0307	0.525638	0.8828	-0.548618
YER158C	0	YER158C	U	0.0672419	-2.97602	-0.459224	-0.190456	-0.214268	-0.563945
YER161C	SPT2	SPT2	U	2.10326			2.42807	-0.365996	1.70852
YER161C	SPT2	SPT2	D	0.820871	0.0466127	1.33674	0.221793	0.190685	-0.0396549
YER162C	RAD4	RAD4	U	-0.201071	-1.36261	0.490699		-1.13519	-1.24027
YER162C	RAD4	RAD4	D	-0.226527	0.822734	0.67068	-0.275938	-0.225103	-1.99108
YER163C	0	YER163C	D	-0.303922	1.26943	-0.943888	-0.0677548	-0.783106	0.36488
YER164W	CHD1	CHD1	D	1.55821	-2.06056	0.273222	-0.481274	-1.2388	-1.52392
YER164W	CHD1	CHD1	U	0.443228	0.450551	-0.0903292	-0.637482	-0.963486	-1.22684
YER166W	DNF1	DNF1	D	-0.115218	-0.581572	1.04664	-0.0567483	-0.52976	-0.588554
YER166W	DNF1	DNF1	U	-0.554438	-0.619838	0.018248	0.008119	-0.355567	-0.124789
YER167W	BCK2	BCK2	D	-3.13633	0.0254849	-0.178144	0.751963	0.513004	0.976154
YER167W	BCK2	BCK2	U	-0.96674	-0.902079	-0.750547	1.08388	0.408328	0.0913639
YER169W	RPH1	RPH1	D	-0.0729472	-0.0511476	1.02591	1.02662	0.0842545	1.68276
YER170W	ADK2	ADK2	D	-0.64066	0.410961	-0.545531	-0.435329	-0.187571	-0.167047
YER170W	ADK2	ADK2	U	0.145484	-0.383612	0.291568	0.590047	0.0594111	0.466621
YER173W	RAD24	RAD24	D	-0.284338	-1.27096	0.152713	1.30614	-0.802541	0.930465
YER173W	RAD24	RAD24	U	-0.309481	-1.05559	-0.998842	1.67859	-0.78607	0.231075
YER174C	GRX4	GRX4	D	2.17133	1.01261	0.466948	0.102431	-1.36763	0.515056
YER174C	GRX4	GRX4	U	0.362618	-0.408184	-0.419822	0.48924	-1.52378	0.401865
YER175C	TMT1	TMT1	D	0.168068	-0.602511	1.17785	0.259125	-1.63818
YER175C	TMT1	TMT1	U	-0.2959	0.800175	-0.579049	0.301529	-0.680635	0.243099
YER176W	ECM32	ECM32	D	-0.705952	-1.30419	-0.00361628	0.451318	0.137994	0.346393
YER176W	ECM32	ECM32	U	-0.802368	0.154963	-1.25516	-0.160891	0.266745	1.13571
YER177W	BMH1	BMH1	D	-4.51701		1.64757	1.0764	2.1092
YER177W	BMH1	BMH1	U	-7.30425	-5.85618	1.06989	-0.411745	-0.511879	0.880968
YER179W	DMC1	DMC1	D	0.0697833	0.701902	0.167808	0.721745	-0.324279	-0.104456
YER179W	DMC1	DMC1	U	0.0948873	0.403363	-0.217663	0.0549886	-0.795332	0.160346
YER180C	ISC10	ISC10	D	0.141263	0.640251	0.779316	0.812667	-0.223288	0.661684
YER180C	ISC10	ISC10	U	0.796913	-0.20622	0.118099	0.292778	1.10658	0.095385
YER181C	0	YER181C	D	0.20703	0.413571	0.8436	0.126055	0.328948	0.0326203
YER181C	0	YER181C	U	0.326639	-0.245433	-0.0437923	0.421334	0.748461	0.0744415
YER182W	FMP10	FMP10	D	0.447787	-2.30104	0.629308	0.156338	-0.0704883	0.0423514
YER182W	FMP10	FMP10	U	-0.872593	-0.016124	-0.709565	0.250935	-0.680707	-0.123617
YER183C	FAU1	FAU1	D	0.396395	-0.414267	-0.118296	0.777492	0.869226	0.345045
YER183C	FAU1	FAU1	U	-0.083681	-0.419046	-0.507438	-0.470723	-0.114679	-0.11188
YER184C	0	YER184C	D	-0.284373	-0.265965	-0.39064	0.151404	-0.510739	-0.176624
YER184C	0	YER184C	U	0.587743	-0.363845	0.227015	-0.447036	-0.29339	0.0350035
YER185W	0	YER185W	D	0.867379	-0.366354	0.565986	-0.386971	-0.0693282	0.164373
YER185W	0	YER185W	U	0.24711	-0.439471	-0.685057	-0.290893	0.368538	1.05971
YER186C	0	YER186C	D	0.00417476	-0.717186	0.0125404	-0.0536563	-0.17751	0.0626003
YER186C	0	YER186C	U	-0.831607	-1.41126	-0.179918	0.249217	-0.818951	-0.178401
YER187W	0	YER187W	D	0.0184621	1.70415	0.6152	0.680655	0.75597	-0.637199
YER187W	0	YER187W	U	-0.812483	-0.591609	-0.772662	0.238009	-0.0410845	0.106751
YER188W	0	YER188W	D	-0.0462474	-0.563599	0.24224	-0.217189	0.20278	0.417366
YER188W	0	YER188W	U	0.21559	0.556581	-0.16139	0.682886	0.25929	-0.0798793
YFL003C	MSH4	MSH4	D	0.493935	0.885872	0.657099	6.44817	0.290723	1.20244
YFL003C	MSH4	MSH4	U	1.02804	1.13925	0.210681	0.646378	0.700687	0.133943
YFL004W	VTC2	VTC2	D	-0.960406	-0.203509	1.08532	-0.750711	-0.493802	-0.871077
YFL004W	VTC2	VTC2	U	0.69044	0.418969	0.0716823	0.477712	0.0313698	0.199052
YFL006W	0	YFL006W	D	0.429658	-0.44555	-0.377183		0.254578	1.04053
YFL006W	0	YFL006W	U	0.0481884	0.432008	0.386897	0.288551	0.276591	-0.543647
YFL007W	BLM10	BLM10	D	0.403307	0.946945	1.37293	6.34894	-0.646378
YFL007W	BLM10	BLM10	U	-0.024167	0.527665	0.277838	0.785769	-0.23669	-1.12828
YFL010C	WWM1	WWM1	D	1.05675	1.08964	1.76261	5.91663	1.6654
YFL010C	WWM1	WWM1	U	-0.0394767	-0.360894	0.080452	0.82832	0.327318	-0.533045
YFL010W-A	AUA1	AUA1	D	0.285165	-0.0430355	0.545107	3.60526	0.1013	0.632077
YFL010W-A	AUA1	AUA1	U	1.37523	-1.5574	-0.120505	0.204143	0.911192	0.20813
YFL011W	HXT10	HXT10	U	0.278698	0.845269	0.939753	0.196616	0.179948	-0.256128
YFL012W	0	YFL012W	U	0.509965		1.07387	0.0603716	1.44272
YFL012W	0	YFL012W	D	0.912069	-1.84387	-0.819035	5.14641	0.122786	2.52407
YFL013C	IES1	IES1	D	0.00109754	-1.15833	0.0472402		-0.945843	2.01155
YFL013C	IES1	IES1	U	0.880149	1.7649	-1.75112	0.398241	-0.765305
YFL013W-A	0	YFL013W-A	D	-0.459555	0.946265	0.675563	-1.21977	-1.88234	-2.22774
YFL013W-A	0	YFL013W-A	D	-1.14277	-0.374934	-1.20206	1.01367	-1.86585	-1.39599
YFL013W-A	0	YFL013W-A	U	-0.00407694	-0.101693	-0.714324	-0.980317	-2.78619	-2.35662
YFL014W	HSP12	HSP12	U	1.45316	0.33793	0.483662	-0.296988	0.327154
YFL014W	HSP12	HSP12	U	0.291962	-0.734095	-0.385633	-0.779661	0.489991
YFL014W	HSP12	HSP12	D	-0.0772403	0.0833622	0.148417	0.79204	0.101059	-0.161507
YFL015C	0	YFL015C	D	-0.283772	0.309678	-0.156377	0.652474	0.0703114	0.586182
YFL015C	0	YFL015C	U	0.18063	0.560198	0.54289	0.507465	0.2872	-0.216173
YFL019C	0	YFL019C	U	1.05864	1.48408	1.63274	1.13513	0.938081
YFL019C	0	YFL019C	D	0.08618	-0.0692128	0.493872	0.532514	0.00525727	0.54085
YFL020C	PAU5	PAU5	U	0.828844		-0.988925	1.60226	0.445942
YFL020C	PAU5	PAU5	D	0.156364	-0.520793	-0.16097	0.30708	-0.390596	0.594095
YFL020C	PAU5	PAU5	U	0.571163	-0.105933	-0.138724	-0.170064	0.288172	-1.01962
YFL021W	GAT1	GAT1	D	0.306937	0.108446	0.356687	0.535836	-0.059245	1.27209
YFL021W	GAT1	GAT1	U	2.14739	1.35372	2.30707	1.11978	1.7073	2.31363
YFL027C	GYP8	GYP8	D	0.0892028	-0.977629	0.103434	0.957441	0.033371	-0.074781
YFL027C	GYP8	GYP8	U	0.567175	0.333856	0.138116	-0.101125	0.427601	-0.232163
YFL028C	CAF16	CAF16	D	0.0708802	0.0819162	0.640848	1.47602	-0.631264	0.69126
YFL028C	CAF16	CAF16	U	0.943895	0.201974	0.0901296	-0.13639	0.670935	1.07582
YFL030W	AGX1	AGX1	D	-0.748166	0.17914	-0.0336927	1.05736	-0.488063	-0.44139
YFL030W	AGX1	AGX1	U	-0.430976	0.13746	-0.0365944	0.226417	-0.396666	-0.127101
YFL031W	HAC1	HAC1	D	0.890985	0.30294	0.587636	0.49119	-0.224967	-0.0813341
YFL031W	HAC1	HAC1	U	0.346726	0.150537	0.720721	-0.12928	0.321742	-0.352962
YFL032W	0	YFL032W	D	-0.0694724		0.339603	-0.197641	-0.59153
YFL032W	0	YFL032W	U	0.0272231	0.226039	0.712238	0.0749029	0.112056	0.215265
YFL033C	RIM15	RIM15	D	1.25424	-1.80127	0.276826	0.684571	-2.6352	-2.92385
YFL033C	RIM15	RIM15	U	2.2182	0.0125538	1.00656	-1.22967	-3.61839	-3.59981
YFL034C-A	RPL22B	RPL22B	D	0.301771	-1.32833	0.6459	-0.138201	0.573374	-1.06507
YFL034C-A	RPL22B	RPL22B	U	-0.229326	0.0880341	0.046664	-0.132393	-0.372453	0.552733
YFL034W	0	YFL034W	U	-0.253147	1.21391	0.0431224	0.341075	0.369865
YFL034W	0	YFL034W	D	-0.210198	-0.262118	-0.227608	-0.00346451	-0.157014	0.645825
YFL034W	0	YFL034W	U	0.382334	0.676736	0.677136	-0.510986	0.0166917	0.138357
YFL035C-B	0	YFL035C-B	D	-0.339728	0.594826	-0.647898	0.138654	-0.240946	0.55554
YFL035C-B	0	YFL035C-B	U	0.369849	-0.63026	0.679908	0.539271	-0.262491	0.748994
YFL040W	0	YFL040W	D	-0.211977	-0.971099	-0.650614	0.374721	-0.18845	0.338733
YFL040W	0	YFL040W	U	1.06036	0.0585195	0.648125	0.420023	0.137501	0.526617
YFL041W	FET5	FET5	D	-0.271246	-0.230123	0.0167007	0.973428	-0.505975	0.904705
YFL041W	FET5	FET5	U	0.693446	-0.811551	-0.183697	0.44315	-0.0884045	-0.436539
YFL042C	0	YFL042C	U	1.59178	-0.193007	0.500946		0.998325	3.47134
YFL042C	0	YFL042C	U	2.06896	-0.332188	0.167129	1.15742	0.551366
YFL042C	0	YFL042C	D	0.0704189	0.111346	-1.10451	0.384618	-0.640727	0.329646
[truncated: 5,052 more rows]
