# Supplementary material for: Genome-wide Fitness Profiles Reveal a Requirement for Autophagy During Yeast Fermentation
Source: G3 (Bethesda). 2011 Oct 1;1(5):353–67. doi: 10.1534/g3.111.000836 (PMC3276155; doi:10.1534/g3.111.000836)
Supplement: Supporting Information [file supp_1.5.353_TableS4.xlsx]

## Sheet: Sheet1
Table S4. Heterozygous deletion mutants with reduced fitness during fermentation
	ORF	Name
Verified	YBR085W	AAC3
Verified	YNL331C	AAD14
Verified	YCR107W	AAD3
Verified	YNL141W	AAH1
Verified	YKL106W	AAT1
Verified	YOR239W	ABP140
Verified	YPL267W	ACM1
Verified	YMR300C	ADE4
Verified	YJR105W	ADO1
Verified	YCR011C	ADP1
Verified	YPL005W	AEP3
Verified	YER017C	AFG3
Verified	YNL100W	AIM37
Verified	YHR199C	AIM46
Verified	YMR092C	AIP1
Verified	YDL175C	AIR2
Verified	YER073W	ALD5
Verified	YNL148C	ALF1
Verified	YBR110W	ALG1
Verified	YNL172W	APC1
Verified	YNL094W	APP1
Verified	YDL192W	ARF1
Verified	YML099C	ARG81
Verified	YMR033W	ARP9
Verified	YGL017W	ATE1
Verified	YOL083W	ATG34
Verified	YNL223W	ATG4
Verified	YDL149W	ATG9
Verified	YBL099W	ATP1
Verified	YDL004W	ATP16
Verified	YNL259C	ATX1
Verified	YGR224W	AZR1
Verified	YER155C	BEM2
Verified	YHR101C	BIG1
Uncharacterized	YLR408C	BLS1
Verified	YDR428C	BNA7
Verified	YDL231C	BRE4
Verified	YER172C	BRR2
Verified	YOL077C	BRX1
Verified	YDR275W	BSC2
Verified	YPL069C	BTS1
Verified	YCR063W	BUD31
Verified	YDR531W	CAB1
Verified	YDR423C	CAD1
Verified	YHL038C	CBP2
Verified	YJR064W	CCT5
Verified	YDL220C	CDC13
Verified	YDR168W	CDC37
Verified	YDR364C	CDC40
Verified	YMR198W	CIK1
Verified	YGL019W	CKB1
Verified	YGL215W	CLG1
Verified	YDL145C	COP1
Verified	YMR256C	COX7
Verified	YOR303W	CPA1
Verified	YOR100C	CRC1
Verified	YDR179C	CSN9
Verified	YGL110C	CUE3
Verified	YGL128C	CWC23
Verified	YPL170W	DAP1
Verified	YHR011W	DIA4
Verified	YDR402C	DIT2
Verified	YDR273W	DON1
Verified	YDR294C	DPL1
Verified	YPR017C	DSS4
Verified	YBR281C	DUG2
Verified	YAL059W	ECM1
Verified	YHR132C	ECM14
Verified	YHL030W	ECM29
Verified	YOR092W	ECM3
Verified	YLR436C	ECM30
Verified	YBR078W	ECM33
Verified	YGL222C	EDC1
Verified	YGL231C	EMC4
Verified	YPL028W	ERG10
Verified	YNL125C	ESBP6
Verified	YBR026C	ETR1
Verified	YOR033C	EXO1
Verified	YDR021W	FAL1
Verified	YNL127W	FAR11
Verified	YFR008W	FAR7
Verified	YPL231W	FAS2
Verified	YLR051C	FCF2
Verified	YER056C	FCY2
Verified	YER032W	FIR1
Uncharacterized	YNL168C	FMP41
Verified	YGL220W	FRA2
Verified	YOR280C	FSH3
Verified	YPL262W	FUM1
Verified	YAL035W	FUN12
Verified	YBR021W	FUR4
Verified	YNL133C	FYV6
Verified	YLR013W	GAT3
Verified	YIR013C	GAT4
Verified	YCL011C	GBP2
Verified	YNL062C	GCD10
Verified	YDL226C	GCS1
Uncharacterized	YBR187W	GDT1
Verified	YCL036W	GFD2
Verified	YDR152W	GIR2
Verified	YNL255C	GIS2
Verified	YLR094C	GIS3
Verified	YML006C	GIS4
Verified	YOR168W	GLN4
Verified	YHR183W	GND1
Verified	YDR508C	GNP1
Verified	YLR364W	GRX8
Verified	YLR258W	GSY2
Verified	YPL189W	GUP2
Verified	YBL032W	HEK2
Verified	YPL254W	HFI1
Verified	YLR450W	HMG2
Verified	YOL013C	HRD1
Verified	YGL073W	HSF1
Verified	YJL159W	HSP150
Verified	YOL012C	HTZ1
Verified	YKL189W	HYM1
Verified	YJL146W	IDS2
Verified	YBR159W	IFA38
Verified	YHR046C	INM1
Verified	YIL026C	IRR1
Verified	YER180C	ISC10
Verified	YOL002C	IZH2
Verified	YDR475C	JIP4
Verified	YPL263C	KEL3
Verified	YDR148C	KGD2
Verified	YDR122W	KIN1
Verified	YPL155C	KIP2
Verified	YKL168C	KKQ8
Verified	YHR186C	KOG1
Verified	YDR532C	KRE28
Verified	YNL308C	KRI1
Verified	YCL059C	KRR1
Verified	YGR040W	KSS1
Verified	YCL005W	LDB16
Verified	YOR322C	LDB19
Verified	YBR204C	LDH1
Verified	YHR156C	LIN1
Verified	YKL143W	LTV1
Verified	YDL131W	LYS21
Verified	YDR060W	MAK21
Verified	YCR019W	MAK32
Verified	YBR298C	MAL31
Verified	YBL091C	MAP2
Dubious	YJL199C	MBB1
Verified	YOR298C-A	MBF1
Verified	YDL003W	MCD1
Verified	YBR227C	MCX1
Verified	YLR188W	MDL1
Verified	YLR368W	MDM30
Verified	YJL102W	MEF2
Verified	YPL121C	MEI5
Verified	YPR138C	MEP3
Verified	YNL210W	MER1
Verified	YNL277W	MET2
Verified	YDR031W	MIC14
Verified	YGL209W	MIG2
Verified	YOL026C	MIM1
Verified	YOR330C	MIP1
Verified	YOR231W	MKK1
Verified	YPL164C	MLH3
Verified	YJL183W	MNN11
Verified	YPL050C	MNN9
Verified	YGL064C	MRH4
Verified	YDL202W	MRPL11
Verified	YHR091C	MSR1
Verified	YDR128W	MTC5
Verified	YMR228W	MTF1
Verified	YGL236C	MTO1
Verified	YBR119W	MUD1
Verified	YNR043W	MVD1
Verified	YMR080C	NAM7
Verified	YPL126W	NAN1
Verified	YDR162C	NBP2
Verified	YHR124W	NDT80
Verified	YKR103W	NFT1
Verified	YDR176W	NGG1
Verified	YBR089C-A	NHP6B
Verified	YIL164C	NIT1
Verified	YDR383C	NKP1
Verified	YNL123W	NMA111
Verified	YDL148C	NOP14
Verified	YLR197W	NOP56
Verified	YGR103W	NOP7
Verified	YGR043C	NQM1
Verified	YNL251C	NRD1
Verified	YBR066C	NRG2
Verified	YKR022C	NTR2
Verified	YDR150W	NUM1
Verified	YKL120W	OAC1
Verified	YER165W	PAB1
Verified	YKR065C	PAM17
Verified	YGL094C	PAN2
Uncharacterized	YGL261C	PAU11
Verified	YGR178C	PBP1
Verified	YDR228C	PCF11
Verified	YNL289W	PCL1
Verified	YIL050W	PCL7
Verified	YLR044C	PDC1
Verified	YDR323C	PEP7
Verified	YBL030C	PET9
Verified	YHR185C	PFS1
Verified	YJL097W	PHS1
Verified	YDR466W	PKH3
Verified	YNL082W	PMS1
Verified	YAL023C	PMT2
Verified	YPL144W	POC4
Verified	YNR052C	POP2
Verified	YDR435C	PPM1
Verified	YLR014C	PPR1
Verified	YER012W	PRE1
Verified	YPR103W	PRE2
Verified	YFR050C	PRE4
Verified	YBL041W	PRE7
Verified	YDL039C	PRM7
Verified	YGL053W	PRM8
Verified	YDR300C	PRO1
Verified	YGR091W	PRP31
Verified	YPL151C	PRP46
Verified	YBR055C	PRP6
Verified	YDR055W	PST1
Verified	YBL046W	PSY4
Verified	YOR157C	PUP1
Verified	YKL015W	PUT3
Verified	YLR196W	PWP1
Verified	YDR030C	RAD28
Verified	YDR004W	RAD57
Verified	YDR217C	RAD9
Verified	YGL246C	RAI1
Verified	YOL010W	RCL1
Verified	YDL135C	RDI1
Verified	YDR028C	REG1
Verified	YCL001W	RER1
Verified	YBR002C	RER2
Verified	YOR127W	RGA1
Verified	YHL027W	RIM101
Verified	YBR192W	RIM2
Verified	YDR198C	RKM2
Verified	YDR091C	RLI1
Verified	YLR009W	RLP24
Verified	YPR065W	ROX1
Verified	YKR025W	RPC37
Verified	YKL006W	RPL14A
Verified	YBL087C	RPL23A
Verified	YGR148C	RPL24B
Verified	YBL092W	RPL32
Verified	YDL184C	RPL41A
Verified	YGL076C	RPL7A
Verified	YDL147W	RPN5
Verified	YJL190C	RPS22A
Verified	YDR394W	RPT3
Verified	YOR117W	RPT5
Verified	YGL048C	RPT6
Verified	YHR038W	RRF1
Verified	YDR065W	RRG1
Verified	YDR087C	RRP1
Verified	YDR280W	RRP45
Verified	YOR049C	RSB1
Verified	YIL093C	RSM25
Verified	YMR266W	RSN1
Verified	YOL138C	RTC1
Verified	YPL183W-A	RTC6
Verified	YGL252C	RTG2
Verified	YGR275W	RTT102
Verified	YDR388W	RVS167
Verified	YDL076C	RXT3
Verified	YDL153C	SAS10
Verified	YBL052C	SAS3
Verified	YHR103W	SBE22
Verified	YBL091C-A	SCS22
Verified	YDR469W	SDC1
Verified	YBL104C	SEA4
Verified	YLR378C	SEC61
Verified	YDR170C	SEC7
Verified	YLR026C	SED5
Verified	YDL168W	SFA1
Verified	YOR140W	SFL1
Verified	YKL130C	SHE2
Verified	YMR175W	SIP18
Verified	YNL007C	SIS1
Verified	YDR409W	SIZ1
Verified	YGL213C	SKI8
Verified	YMR216C	SKY1
Verified	YBL007C	SLA1
Verified	YDL052C	SLC1
Verified	YBR156C	SLI15
Verified	YBR077C	SLM4
Verified	YCR024C	SLM5
Dubious	YBR266C	SLM6
Verified	YER116C	SLX8
Verified	YOR159C	SME1
Verified	YOR327C	SNC2
Verified	YBR289W	SNF5
Verified	YNL334C	SNO2
Verified	YLL011W	SOF1
Verified	YDR356W	SPC110
Verified	YER148W	SPT15
Verified	YBR081C	SPT7
Verified	YGL097W	SRM1
Verified	YNL189W	SRP1
Verified	YMR101C	SRT1
Verified	YHR066W	SSF1
Verified	YKL124W	SSH4
Verified	YNL222W	SSU72
Verified	YDR103W	STE5
Verified	YIL126W	STH1
Verified	YDR082W	STN1
Verified	YIR011C	STS1
Verified	YPL016W	SWI1
Verified	YJL176C	SWI3
Verified	YMR149W	SWP1
Verified	YNL081C	SWS2
Verified	YNL187W	SWT21
Verified	YPL009C	TAE2
Verified	YML015C	TAF11
Verified	YBR198C	TAF5
Verified	YBR069C	TAT1
Verified	YPR140W	TAZ1
Verified	YML072C	TCB3
Uncharacterized	YIL039W	TED1
Verified	YBL088C	TEL1
Verified	YGR005C	TFG2
Verified	YLR178C	TFS1
Verified	YKL140W	TGL1
Verified	YDR429C	TIF35
Verified	YPR040W	TIP41
Verified	YDL110C	TMA17
Verified	YER007C-A	TMA20
Verified	YNL273W	TOF1
Verified	YGR082W	TOM20
Verified	YOL006C	TOP1
Verified	YBR126C	TPS1
Verified	YNR046W	TRM112
Verified	YBR061C	TRM7
Verified	YDR165W	TRM82
Verified	YDR354W	TRP4
Verified	YDR246W	TRS23
Verified	YBR265W	TSC10
Verified	YOL022C	TSR4
Verified	YML085C	TUB1
Verified	YML124C	TUB3
Verified	YOR251C	TUM1
Verified	YCR084C	TUP1
Verified	YBR166C	TYR1
Verified	YHR111W	UBA4
Verified	YDR059C	UBC5
Verified	YMR223W	UBP8
Verified	YDL210W	UGA4
Verified	YBR173C	UMP1
Verified	YDR400W	URH1
Verified	YBL004W	UTP20
Verified	YEL040W	UTR2
Verified	YEL013W	VAC8
Verified	YML115C	VAN1
Verified	YGL258W	VEL1
Verified	YPL253C	VIK1
Verified	YDR049W	VMS1
Verified	YMR077C	VPS20
Verified	YLR360W	VPS38
Verified	YGL095C	VPS45
Verified	YDR200C	VPS64
Dubious	YLR322W	VPS65
Verified	YML041C	VPS71
Verified	YOR083W	WHI5
Verified	YGR194C	XKS1
Verified	YGR241C	YAP1802
Verified	YOL028C	YAP7
Verified	YDR325W	YCG1
Verified	YEL006W	YEA6
Verified	YOL128C	YGK3
Verified	YLR298C	YHC1
Verified	YMR152W	YIM1
Verified	YGR172C	YIP1
Verified	YBR104W	YMC2
Verified	YER005W	YND1
Verified	YDR057W	YOS9
Uncharacterized	YGL259W	YPS5
Verified	YDR349C	YPS7
Verified	YOR162C	YRR1
Verified	YMR089C	YTA12
Verified	YGR211W	ZPR1
Dubious	YAL042C-A
Uncharacterized	YBL010C
Dubious	YBL012C
Dubious	YBL083C
Uncharacterized	YBR063C
Dubious	YBR064W
Uncharacterized	YBR071W
Uncharacterized	YBR096W
Dubious	YBR224W
Dubious	YBR226C
Verified	YBR238C
Dubious	YBR292C
Dubious	YCR006C
Dubious	YCR049C
Uncharacterized	YCR087C-A
Dubious	YDL011C
Dubious	YDL071C
Uncharacterized	YDL086W
Uncharacterized	YDL180W
Dubious	YDL221W
Dubious	YDR015C
Uncharacterized	YDR115W
Uncharacterized	YDR132C
Uncharacterized	YDR179W-A
Uncharacterized	YDR210W
Uncharacterized	YDR306C
Dubious	YDR327W
Verified	YDR341C
Uncharacterized	YDR348C
Dubious	YDR413C
Uncharacterized	YEL023C
Verified	YEL043W
Dubious	YER066C-A
Uncharacterized	YER077C
Dubious	YER097W
Dubious	YER119C-A
Uncharacterized	YFR006W
Verified	YFR016C
Uncharacterized	YFR017C
Uncharacterized	YFR045W
Dubious	YFR054C
Dubious	YGL069C
Dubious	YGL072C
Dubious	YGL102C
Uncharacterized	YGL108C
Dubious	YGL118C
Uncharacterized	YGL138C
Uncharacterized	YGR021W
Dubious	YGR039W
Dubious	YGR073C
Verified	YGR102C
Uncharacterized	YGR168C
Verified	YGR283C
Dubious	YGR290W
Uncharacterized	YHL008C
Uncharacterized	YHL042W
Dubious	YHR130C
Uncharacterized	YIL055C
	YIL171W
Dubious	YJL009W
Uncharacterized	YJL132W
Dubious	YJL182C
Uncharacterized	YJL185C
Uncharacterized	YJR015W
Uncharacterized	YKL023W
Uncharacterized	YKL033W-A
Uncharacterized	YKL077W
Dubious	YKL147C
Dubious	YKL177W
Uncharacterized	YKR005C
Dubious	YLL059C
Dubious	YLR123C
Uncharacterized	YLR224W
Uncharacterized	YLR297W
Uncharacterized	YLR413W
Uncharacterized	YLR456W
Uncharacterized	YMR196W
Verified	YMR210W
Verified	YMR295C
Dubious	YNL028W
Uncharacterized	YNL200C
Dubious	YNL228W
Uncharacterized	YNR040W
Uncharacterized	YNR063W
Uncharacterized	YNR071C
Uncharacterized	YOL024W
Dubious	YOL035C
Uncharacterized	YOL036W
Dubious	YOL046C
Dubious	YOR041C
Dubious	YOR072W
Uncharacterized	YOR097C
Dubious	YOR139C
Dubious	YOR169C
Dubious	YOR263C
Dubious	YOR376W
Uncharacterized	YPL014W
Dubious	YPL114W
Verified	YPL225W
Uncharacterized	YPR003C
