# Supplementary material for: Genome-wide Fitness Profiles Reveal a Requirement for Autophagy During Yeast Fermentation
Source: G3 (Bethesda). 2011 Oct 1;1(5):353–67. doi: 10.1534/g3.111.000836 (PMC3276155; doi:10.1534/g3.111.000836)
Supplement: Supporting Information [file supp_1.5.353_TableS5.xlsx]

## Sheet: Sheet1
Table S5. Heterozygous deletion mutants with increased fitness during fermentation
	ORF	Name
Verified	YBR236C	ABD1
Verified	YJR108W	ABM1
Verified	YLR144C	ACF2
Verified	YLR359W	ADE13
Verified	YPL202C	AFT2
Verified	YFR011C	AIM13
Verified	YIL087C	AIM19
Verified	YKR074W	AIM29
Verified	YBL082C	ALG3
Verified	YFL050C	ALR2
Verified	YPR128C	ANT1
Verified	YPR180W	AOS1
Verified	YKL157W	APE2
Verified	YJL024C	APS3
Verified	YPR192W	AQY1
Verified	YOL058W	ARG1
Verified	YHL047C	ARN2
Verified	YOR141C	ARP8
Verified	YCL038C	ATG22
Verified	YLR356W	ATG33
Verified	YPR026W	ATH1
Verified	YNL315C	ATP11
Verified	YJR121W	ATP2
Verified	YML116W	ATR1
Verified	YJR001W	AVT1
Verified	YBR068C	BAP2
Uncharacterized	YAL061W	BDH2
Verified	YDR299W	BFR2
Verified	YJR025C	BNA1
Verified	YJR078W	BNA2
Verified	YOR078W	BUD21
Verified	YLR353W	BUD8
Verified	YIL083C	CAB2
Verified	YKL011C	CCE1
Verified	YIL142W	CCT2
Verified	YJL014W	CCT3
Verified	YDL143W	CCT4
Verified	YJL008C	CCT8
Verified	YLR215C	CDC123
Verified	YFR036W	CDC26
Verified	YPL160W	CDC60
Verified	YLR418C	CDC73
Verified	YGL130W	CEG1
Verified	YCL064C	CHA1
Verified	YOR356W	CIR2
Verified	YDR022C	CIS1
Verified	YLR133W	CKI1
Verified	YER157W	COG3
Verified	YNL041C	COG6
Verified	YOL096C	COQ3
Verified	YPL172C	COX10
Verified	YJR032W	CPR7
Verified	YGR189C	CRH1
Verified	YLR087C	CSF1
Verified	YLR380W	CSR1
Verified	YJL006C	CTK2
Verified	YMR180C	CTL1
Verified	YPR158W	CUR1
Verified	YMR240C	CUS1
Verified	YGR278W	CWC22
Verified	YDL117W	CYK3
Verified	YDR052C	DBF4
Verified	YLR276C	DBP9
Verified	YKL149C	DBR1
Verified	YCL016C	DCC1
Verified	YLR128W	DCN1
Verified	YOR173W	DCS2
Verified	YER143W	DDI1
Verified	YDR051C	DET1
Verified	YOL021C	DIS3
Verified	YDR093W	DNF2
Verified	YML080W	DUS1
Verified	YLR228C	ECM22
Verified	YEL015W	EDC3
Verified	YMR031C	EIS1
Verified	YJR125C	ENT3
Verified	YGR284C	ERV29
Verified	YCR028C	FEN2
Verified	YBR040W	FIG1
Verified	YJR093C	FIP1
Verified	YNL068C	FKH2
Verified	YAR050W	FLO1
Uncharacterized	YPL222W	FMP40
Uncharacterized	YGR243W	FMP43
Verified	YDR110W	FOB1
Uncharacterized	YOR271C	FSF1
Verified	YER145C	FTR1
Verified	YLR088W	GAA1
Verified	YOL051W	GAL11
Verified	YFL021W	GAT1
Verified	YGL057C	GEP7
Verified	YER083C	GET2
Verified	YCR098C	GIT1
Verified	YER133W	GLC7
Verified	YDL207W	GLE1
Verified	YJR013W	GPI14
Verified	YGR032W	GSC2
Verified	YLL060C	GTT2
Verified	YDR295C	HDA2
Verified	YNL030W	HHF2
Verified	YPL127C	HHO1
Verified	YFR025C	HIS2
Verified	YJR055W	HIT1
Verified	YMR032W	HOF1
Verified	YMR172W	HOT1
Verified	YBR133C	HSL7
Verified	YDR258C	HSP78
Verified	YGR223C	HSV2
Verified	YBL003C	HTA2
Verified	YPR033C	HTS1
Verified	YER065C	ICL1
Verified	YPL250C	ICY2
Verified	YNL037C	IDH1
Verified	YFL013C	IES1
Verified	YNL215W	IES2
Verified	YLR052W	IES3
Verified	YJR016C	ILV3
Verified	YCL009C	ILV6
Verified	YJR094C	IME1
Verified	YNL075W	IMP4
Verified	YDR287W	INM2
Dubious	YOR135C	IRC14
Verified	YLR021W	IRC25
Uncharacterized	YFR055W	IRC7
Verified	YNL265C	IST1
Verified	YBR245C	ISW1
Verified	YJR119C	JHD2
Verified	YLR347C	KAP95
Verified	YNL188W	KAR1
Verified	YCL055W	KAR4
Verified	YIL027C	KRE27
Verified	YLR260W	LCB5
Verified	YLL049W	LDB18
Verified	YJR070C	LIA1
Verified	YLR011W	LOT6
Verified	YBL026W	LSM2
Verified	YER112W	LSM4
Verified	YNL006W	LST8
Verified	YOL060C	MAM3
Verified	YML104C	MDM1
Verified	YHR194W	MDM31
Verified	YGR121C	MEP1
Verified	YKL001C	MET14
Verified	YJR137C	MET5
Verified	YBR213W	MET8
Verified	YPL169C	MEX67
Verified	YNL145W	MFA2
Verified	YGR249W	MGA1
Verified	YJL042W	MHP1
Verified	YLL062C	MHT1
Verified	YPL140C	MKK2
Verified	YBR098W	MMS4
Verified	YHR204W	MNL1
Verified	YBR015C	MNN2
Verified	YOR274W	MOD5
Verified	YOR288C	MPD1
Verified	YIR002C	MPH1
Verified	YDL028C	MPS1
Verified	YDL079C	MRK1
Verified	YDR116C	MRPL1
Verified	YNL284C	MRPL10
Verified	YBL038W	MRPL16
Verified	YPL013C	MRPS16
Verified	YGR165W	MRPS35
Verified	YBR251W	MRPS5
Verified	YOR188W	MSB1
Verified	YDR205W	MSC2
Verified	YOR354C	MSC6
Verified	YNL073W	MSK1
Verified	YOL116W	MSN1
Verified	YGR028W	MSP1
Verified	YDL107W	MSS2
Verified	YLR203C	MSS51
Verified	YGR158C	MTR3
Verified	YJL050W	MTR4
Verified	YIR019C	MUC1
Verified	YPL190C	NAB3
Verified	YOR253W	NAT5
Verified	YPR155C	NCA2
Verified	YGL211W	NCS6
Verified	YML031W	NDC1
Verified	YLR265C	NEJ1
Verified	YIL048W	NEO1
Verified	YPL226W	NEW1
Verified	YLR315W	NKP2
Verified	YLR195C	NMT1
Verified	YPL093W	NOG1
Verified	YNR053C	NOG2
Verified	YNL110C	NOP15
Verified	YCR026C	NPP1
Verified	YEL062W	NPR2
Verified	YHL023C	NPR3
Verified	YOR071C	NRT1
Verified	YOR373W	NUD1
Verified	YKR082W	NUP133
Verified	YJR042W	NUP85
Verified	YNL056W	OCA2
Verified	YOL032W	OPI10
Verified	YHR179W	OYE2
Verified	YNL015W	PBI2
Verified	YGR202C	PCT1
Verified	YLR148W	PEP3
Verified	YOR158W	PET123
Verified	YJL023C	PET130
Verified	YDR265W	PEX10
Verified	YDR142C	PEX7
Verified	YMR205C	PFK2
Verified	YER037W	PHM8
Verified	YNL097C	PHO23
Verified	YFR034C	PHO4
Verified	YDR481C	PHO8
Verified	YCR037C	PHO87
Verified	YBR296C	PHO89
Verified	YOR386W	PHR1
Verified	YML061C	PIF1
Verified	YOR363C	PIP2
Verified	YKL164C	PIR1
Verified	YOL100W	PKH2
Verified	YOL011W	PLB3
Verified	YGL008C	PMA1
Verified	YEL060C	PRB1
Verified	YMR314W	PRE5
Verified	YNL279W	PRM1
Verified	YER013W	PRP22
Verified	YBL068W	PRS4
Verified	YNL169C	PSD1
Verified	YLL010C	PSR1
Verified	YDR496C	PUF6
Verified	YLR165C	PUS5
Verified	YOR347C	PYK2
Verified	YPR191W	QCR2
Verified	YFR033C	QCR6
Verified	YIL121W	QDR2
Verified	YMR201C	RAD14
Verified	YGR258C	RAD2
Verified	YCR036W	RBK1
Verified	YJR021C	REC107
Verified	YOR207C	RET1
Verified	YPL010W	RET3
Verified	YLR073C	RFU1
Verified	YMR182C	RGM1
Verified	YBL033C	RIB1
Verified	YDR487C	RIB3
Verified	YOL143C	RIB4
Verified	YGL045W	RIM8
Verified	YMR234W	RNH1
Verified	YNL072W	RNH201
Verified	YOR210W	RPB10
Verified	YIL021W	RPB3
Verified	YOR224C	RPB8
Verified	YHR143W-A	RPC10
Verified	YLR075W	RPL10
Verified	YEL054C	RPL12A
Verified	YMR142C	RPL13B
Verified	YJL177W	RPL17B
Verified	YBR191W	RPL21A
Verified	YLR061W	RPL22A
Verified	YER117W	RPL23B
Verified	YGL031C	RPL24A
Verified	YOL127W	RPL25
Verified	YGR034W	RPL26B
Verified	YIL018W	RPL2B
Verified	YER056C-A	RPL34A
Verified	YMR194W	RPL36A
Verified	YKR094C	RPL40B
Verified	YDL133C-A	RPL41B
Verified	YLR448W	RPL6B
Verified	YDR427W	RPN9
Verified	YOR116C	RPO31
Verified	YDL130W	RPP1B
Verified	YGR214W	RPS0A
Verified	YOR369C	RPS12
Verified	YJL191W	RPS14B
Verified	YMR143W	RPS16A
Verified	YOL121C	RPS19A
Verified	YNL302C	RPS19B
Verified	YML063W	RPS1B
Verified	YGL123W	RPS2
Verified	YLR367W	RPS22B
Verified	YPR132W	RPS23B
Verified	YER074W	RPS24A
Verified	YIL069C	RPS24B
Verified	YER131W	RPS26B
Verified	YDL061C	RPS29B
Verified	YLR167W	RPS31
Verified	YJR145C	RPS4A
Verified	YBL072C	RPS8A
Verified	YKL082C	RRP14
Verified	YPR143W	RRP15
Verified	YPR137W	RRP9
Uncharacterized	YOL048C	RRT8
Verified	YLR221C	RSA3
Verified	YDR041W	RSM10
Verified	YGL129C	RSM23
Verified	YHR154W	RTT107
Verified	YPL235W	RVB2
Verified	YBR095C	RXT2
Verified	YBR280C	SAF1
Verified	YPL273W	SAM4
Verified	YHL034C	SBP1
Verified	YKL148C	SDH1
Verified	YLR022C	SDO1
Verified	YBR080C	SEC18
Verified	YER081W	SER3
Verified	YJR095W	SFC1
Verified	YJL145W	SFH5
Verified	YHL006C	SHU1
Verified	YOR137C	SIA1
Verified	YOL004W	SIN3
Verified	YGR195W	SKI6
Verified	YLR275W	SMD2
Verified	YDR073W	SNF11
Verified	YOR290C	SNF2
Verified	YDR425W	SNX41
Verified	YMR016C	SOK2
Verified	YKR037C	SPC34
Verified	YNL126W	SPC98
Verified	YHR153C	SPO16
Verified	YDR104C	SPO71
Verified	YPL138C	SPP1
Verified	YDR523C	SPS1
Verified	YGR116W	SPT6
Verified	YKL122C	SRP21
Verified	YJR045C	SSC1
Verified	YHR184W	SSP1
Verified	YLR250W	SSP120
Verified	YDR086C	SSS1
Verified	YJL156C	SSY5
Verified	YFL026W	STE2
Verified	YMR125W	STO1
Verified	YBL034C	STU1
Verified	YIL162W	SUC2
Verified	YJR007W	SUI2
Verified	YDR297W	SUR2
Verified	YDR260C	SWM1
Verified	YPL105C	SYH1
Verified	YMR005W	TAF4
Verified	YJR046W	TAH11
Verified	YPL128C	TBF1
Verified	YOR086C	TCB1
Uncharacterized	YJR116W	TDA4
Verified	YGR099W	TEL2
Verified	YJR019C	TES1
Verified	YDR311W	TFB1
Verified	YDR362C	TFC6
Verified	YPL007C	TFC8
Verified	YGR186W	TFG1
Verified	YMR313C	TGL3
Verified	YOL055C	THI20
Verified	YIL144W	TID3
Verified	YPR016C	TIF6
Verified	YJL143W	TIM17
Verified	YOL093W	TRM10
Verified	YHR070W	TRM5
Verified	YDR407C	TRS120
Verified	YCR083W	TRX3
Verified	YOR006C	TSR3
Verified	YDR390C	UBA2
Verified	YJL197W	UBP12
Verified	YBR273C	UBX7
Verified	YML088W	UFO1
Verified	YGR019W	UGA1
Verified	YDR470C	UGO1
Verified	YPL139C	UME1
Verified	YML106W	URA5
Verified	YKR042W	UTH1
Verified	YJL069C	UTP18
Verified	YJR049C	UTR1
Verified	YJL029C	VPS53
Verified	YJR044C	VPS55
Verified	YJR126C	VPS70
Verified	YJL012C	VTC4
Verified	YNL197C	WHI3
Verified	YHR134W	WSS1
Verified	YJR067C	YAE1
Verified	YPL252C	YAH1
Verified	YCR004C	YCP4
Verified	YLL055W	YCT1
Verified	YEL004W	YEA4
Verified	YLL012W	YEH1
Verified	YER041W	YEN1
Verified	YMR040W	YET2
Verified	YHR029C	YHI9
Verified	YMR241W	YHM2
Verified	YFR003C	YPI1
Verified	YER031C	YPT31
Verified	YBR148W	YSW1
Verified	YGR285C	ZUO1
Dubious	YAL034C-B
Dubious	YBL065W
Uncharacterized	YBL095W
Verified	YBR016W
Uncharacterized	YBR184W
Dubious	YBR190W
Uncharacterized	YCR051W
Dubious	YCR087W
Dubious	YDL050C
Uncharacterized	YDL118W
Uncharacterized	YDL211C
Dubious	YDR187C
Uncharacterized	YDR286C
Dubious	YER087C-A
Uncharacterized	YER158C
Dubious	YFL019C
Dubious	YFL032W
Uncharacterized	YFR039C
Dubious	YGL074C
Dubious	YGR050C
Uncharacterized	YGR117C
Uncharacterized	YHL017W
Uncharacterized	YHR035W
Dubious	YIL028W
Dubious	YIL032C
Dubious	YIL086C
Dubious	YIL141W
Uncharacterized	YIR016W
Dubious	YJL007C
Dubious	YJL015C
Uncharacterized	YJL027C
Dubious	YJR020W
	YJR026W
Verified	YKR043C
Verified	YLL032C
Dubious	YLL037W
Uncharacterized	YLL053C
Uncharacterized	YLR042C
Uncharacterized	YLR072W
Uncharacterized	YLR152C
Dubious	YLR184W
Dubious	YLR282C
Uncharacterized	YLR283W
Dubious	YLR294C
Dubious	YLR339C
Uncharacterized	YLR352W
Dubious	YLR366W
Dubious	YLR434C
Dubious	YLR444C
Dubious	YML009W-B
Verified	YMR074C
Dubious	YMR075C-A
Uncharacterized	YMR090W
Uncharacterized	YMR187C
Uncharacterized	YMR206W
Uncharacterized	YNL092W
Dubious	YNL226W
Uncharacterized	YNR021W
Dubious	YNR025C
Dubious	YNR042W
Uncharacterized	YNR068C
Uncharacterized	YOL019W
Verified	YOL057W
Dubious	YOL079W
Uncharacterized	YOR021C
Dubious	YOR225W
Uncharacterized	YOR238W
Dubious	YOR331C
Dubious	YOR345C
Uncharacterized	YOR352W
Dubious	YPL080C
Uncharacterized	YPL109C
Dubious	YPL136W
Dubious	YPL251W
Uncharacterized	YPL264C
Dubious	YPR077C
Dubious	YPR092W
Dubious	YPR099C
