# Supplementary material for: Genome-wide Fitness Profiles Reveal a Requirement for Autophagy During Yeast Fermentation
Source: G3 (Bethesda). 2011 Oct 1;1(5):353–67. doi: 10.1534/g3.111.000836 (PMC3276155; doi:10.1534/g3.111.000836)
Supplement: Supporting Information [file supp_1.5.353_TableS6.xlsx]

## Sheet: Sheet1
Table S6. Heterozygous deletion mutant pool fermentation fitness profiles
ORF	Name	Tag	2vs1	4vs1	6vs1	8vs1	10vs1	14vs1
YMR056C	AAC1	D	-0.0985188	0.593711	0.501568	-0.548638	0.638022	0.0381019
YMR056C	AAC1	U	-0.318029	0.894036	-0.0296445	0.0538358	0.641215	-0.459805
YBR085W	AAC3	U	-2.4538	-2.11	-1.03946	-4.67343	-1.72528	-0.720205
YNL331C	AAD14	D	-2.16808	-1.03062	-2.73247	0.981656	-0.385349	1.94629
YCR107W	AAD3	U	-2.33468	2.17652	-2.07261	-3.90049
YDL243C	AAD4	D	-1.59879	0.819644	0.80308	-0.570389	-0.0462749	0.106009
YDL243C	AAD4	U	-2.03246	-0.928521	0.686831	0.784683	0.43126	-1.56022
YFL056C	AAD6	D	0.00557714	0.556876	1.00017	0.357514	1.10746	-0.231088
YFL056C	AAD6	U	0.761148	0.981509	-0.577331	-2.54244	-0.196922	-0.00768445
YNL141W	AAH1	U		-2.53282		-1.25503	-0.746734	-1.70209
YHR047C	AAP1	D	1.08114	0.103675	1.00683	-0.510052	-0.282732	-2.83343
YHR047C	AAP1	U	-0.628356	2.36099	0.855323	0.729773	-1.76553	1.10611
YBL074C	AAR2	D	-0.479191	-0.2955	-0.99298	-1.70132	-0.650271	0.281896
YBL074C	AAR2	U	0.476639	0.0841986	-0.415175	0.952295	1.33299	0.37747
YKL106W	AAT1	U	0.552434	1.15772	-0.372772	-0.0526683	0.0725688	0.532724
YKL106W	AAT1	D	-1.14406	-2.7389	0.141417	-1.00939	-0.469571	1.21868
YLR027C	AAT2	D	-0.444694	-0.690679	-0.760379	-1.3792	-1.59973	-0.102855
YLR027C	AAT2	U	-0.298365	0.960516	-0.219396	0.688132	1.17686	0.477162
YBR236C	ABD1	U	1.09481	0.966424	1.09617	1.59507	2.48391	0.521953
YBR236C	ABD1	D	-0.49396	-0.412537	-0.799528	-1.72075	-1.38666	1.0152
YKL112W	ABF1	D	0.323692	-1.62552	1.12725	2.34576	0.241679	0.910266
YKL112W	ABF1	U	-0.709501	-1.72834	-0.425964	0.752231	-0.0201142	0.539428
YMR072W	ABF2	D	2.17274	1.07508	0.329283	0.600778	-0.897039	-0.472774
YJR108W	ABM1	U	1.46532	-1.39904	5.51232	-1.53733	1.00736	-1.88259
YCR088W	ABP1	D	0.716895	0.000327978	-0.0708852	-0.204646	0.13385	-0.25392
YCR088W	ABP1	U	0.339962	0.241994	-0.345013	-0.218849	0.345561	0.0979784
YOR239W	ABP140	D	-0.917697	0.439779	0.405091	1.07631	0.863714	0.208651
YOR239W	ABP140	U	-3.863		-7.9312	-4.20507	-5.17254	-2.26059
YMR289W	ABZ2	U	-0.374682		-0.991867	-0.120229	0.426522	0.475245
YER045C	ACA1	D	0.83079	2.28823	0.0460743	-1.47081	0.801908	-1.33063
YER045C	ACA1	U	-0.737054	-0.108812	-1.76826	0.571813	-1.01324	1.03971
YGR037C	ACB1	D	1.11588	0.831821	-0.657421	-0.210196	-1.03319	1.24803
YNR016C	ACC1	D	-0.732167	-1.24032	-0.87741	1.15517	-1.05634	1.03225
YNR016C	ACC1	U	0.657298	-0.429312	-0.910055	1.19062	-1.00612	0.5222
YLR131C	ACE2	U	0.402592	-0.291827	-0.306825	-0.0512578	0.435516	-0.356125
YLR144C	ACF2	D	1.44247	0.545033	-0.132394	1.03968	-0.819881	1.08562
YJR083C	ACF4	D	0.96328	0.00728841	-0.0148691	-1.11066	0.38403	0.950818
YJR083C	ACF4	U	0.220324	0.24201	0.359275	0.181346	0.631532	0.434283
YBL015W	ACH1	D	0.658178	0.573114	-1.12779	0.697978	-0.388523	-1.37271
YBL015W	ACH1	U	0.2058	1.42831	-0.150356	0.407936	-0.152189	-0.583234
YDL203C	ACK1	D	-0.984253	0.0096344	-0.815678	1.01543	2.23535	0.72035
YDL203C	ACK1	U	-1.45791	-0.73242	-0.49477	0.186179	-0.448566	-0.252629
YPL267W	ACM1	D	-0.691225	1.50291	-0.280026	0.792295		-0.519992
YPL267W	ACM1	U	-1.47943	-0.34663	-1.47818	-0.193709	-2.09824	-0.334949
YDR511W	ACN9	D	-0.301551	0.154547	0.562647	0.760794	-0.858509	0.514899
YDR511W	ACN9	U	0.375317	-1.00591	-1.02243	0.270669	-0.133585	0.374163
YLR304C	ACO1	D	0.0675339	0.307097	3.27084	0.466112	-1.04004	0.669871
YJL200C	ACO2	D	0.0312761	-0.0358388	-0.498977	-0.126371	-0.142508	-0.411378
YJL200C	ACO2	U	0.205962	-1.15259	0.717625	0.724438	0.896203	0.330356
YKL192C	ACP1	D	0.298093	-0.501102		-2.08859		1.13587
YKL192C	ACP1	U	-1.32979	-0.366642	-0.454992	-0.45096	0.0819662	0.769119
YAL054C	ACS1	D	0.642117	1.29888	0.824517	0.10998	-0.218807	0.296844
YAL054C	ACS1	U	0.250548	0.0515407	-0.118821	0.188947	-0.0597662	0.244145
YLR153C	ACS2	D	1.10103	0.885099	-0.384215	0.394316	0.961634	-0.425408
YLR153C	ACS2	U	-0.398142	-2.19067	0.278577	-0.866755	-1.21445	0.24476
YFL039C	ACT1	U	2.79734	1.46454			0.159967	0.903103
YDR448W	ADA2	D	0.0118884	1.0885	0.662277	0.338236	0.213595	0.59347
YMR184W	ADD37	U	-0.0123884	-0.584655	0.034158	0.394069	0.236929	0.254844
YKL206C	ADD66	U	0.507233		-1.67336	2.44368		0.109178
YKL206C	ADD66	D	-0.65556	-0.145928	-0.290289	-0.978099	-0.204026	-1.2764
YAR015W	ADE1	U	-0.131144	-0.045305	-0.0816109	0.497857	0.583012	0.0148118
YLR359W	ADE13	U	2.10918	-1.38581	0.316441	2.09247	0.17663	1.86787
YLR359W	ADE13	D	-0.676769	-0.313434	-1.12258	-0.876778	-1.0668	1.26469
YLR028C	ADE16	U	-0.0728955	0.449153	-0.943368	0.374681	-0.211614	1.89031
YMR120C	ADE17	D	0.396702	0.5867	-0.427174	-1.08429	-0.0184806	-1.1384
YMR120C	ADE17	U	-0.24578	-0.653497	-0.263232	0.392674	-1.39281	-0.199782
YOR128C	ADE2	D	0.459472	-1.36047	-0.29823	0.554807	-0.406557	0.175066
YGR204W	ADE3	D	0.66867	1.23126	1.03924	-0.476275	-0.806081	0.0363411
YMR300C	ADE4	U	-0.350058	-0.076282	-0.156233	-0.436959	0.0890356	-0.165668
YMR300C	ADE4	D	-1.11475	-0.096576	-0.431623	-1.33205	-1.54839	-0.0512359
YGR061C	ADE6	D	-0.822322	0.323266	1.91866	-0.715863	-0.753156	-1.6929
YGR061C	ADE6	U	-0.825757	-0.754437	0.800626	-1.04968	-0.308973	0.702397
YDR408C	ADE8	D	-0.0084071	-1.00456	0.94895	1.01271	-0.921983	-2.28904
YOL086C	ADH1	D	1.86094	0.78371	2.06504	-1.7844	0.117568	0.708205
YMR303C	ADH2	D	0.226231	-0.376868	0.65916	0.739103	-0.444564	0.285309
YMR303C	ADH2	U	-0.117582	-0.341227	-0.421715	-0.0411139	0.403376	-0.637093
YMR083W	ADH3	D	1.21023	0.0131146	-0.767689	0.0397726	0.447627	-1.03675
YMR083W	ADH3	U	1.10549	0.293099	0.498845	0.0466749	0.980653	-0.815522
YGL256W	ADH4	D	-1.19389	-0.8409	-0.247372	0.535927	0.197675	-0.5301
YGL256W	ADH4	U	0.0376691	-0.0885012	-1.57137	-1.66188	0.106003	-0.0954897
YBR145W	ADH5	D	-0.530444	-0.197367	0.12306	0.466348	0.989015	-0.0619867
YBR145W	ADH5	U	0.958001	-0.0956014	-0.52003	-0.46693	1.17894	-0.0661534
YMR318C	ADH6	D	0.90032	0.413056	0.497122	-0.845269	0.63018	0.526276
YMR318C	ADH6	U	0.650191	0.27721	0.332227	-0.420297	0.29204	-0.628021
YCR105W	ADH7	D	0.531015	1.3433	-0.546849	0.808865	1.93714	0.166204
YCR105W	ADH7	U	-0.2651	-0.0472577	-0.0348975	0.017808	-0.251998	0.254507
YMR009W	ADI1	U	0.896691	-0.299209	-0.238783	-0.238064	-1.00877	-1.18224
YDR226W	ADK1	D	-0.225979	-0.337829	-0.709279	-0.289043	-0.889459	-0.581777
YER170W	ADK2	D	0.0387524	0.176425	-0.320771	0.250955	0.445932	-0.216147
YER170W	ADK2	U	0.728876	-0.561742	0.0334076	-0.470674	-0.502598	-0.0731378
YJR105W	ADO1	D	0.264142	0.51365	0.876643	-0.797334	0.109411	-0.299838
YJR105W	ADO1	U			-0.138331	-3.86911	-3.27543	-3.14485
YCR011C	ADP1	D	0.0588596	0.947047	0.0214863	-0.509103	0.157383	0.329824
YCR011C	ADP1	U	-0.765124	-1.89206	-0.651635	-2.04579	-1.01923	-0.227638
YDR216W	ADR1	D	-0.535859	0.326359	-0.566537	-0.924778	-0.273155	0.423011
YDR216W	ADR1	D	-0.101866	0.375438	-0.809034	-0.974987	-0.19469	0.0880044
YDR216W	ADR1	U	0.040971	0.308104	0.114346	-0.889537	-0.00915675	0.489448
YCR010C	ADY2	D	0.0161845	1.07506	0.373709	-0.38689	1.80297	-0.784787
YCR010C	ADY2	U	0.124137	-0.0652772	0.447209	-0.690427	0.927562	1.28372
YDL239C	ADY3	D	-0.552701	-1.78041	-0.470154	-0.436401	0.359165	0.737443
YLR227C	ADY4	U	-1.04096	-1.1714	-0.418754	-0.302748	-0.423338	1.21269
YMR064W	AEP1	D	0.576577	-0.665272	0.418103	-0.746749	0.851001	2.83428
YMR064W	AEP1	U	2.10493	0.0293984	-0.370188	0.235663	-0.420943	1.53068
YMR282C	AEP2	D	-0.0446049	-0.306859	-0.527805	-0.320512	0.0860345	0.107525
YMR282C	AEP2	U	0.393424	0.470151	0.689352	-0.154078	0.537132	-0.137703
YPL005W	AEP3	D	1.27067	-0.0915942	-1.02329	-0.151452	0.50716	-1.03893
YPL005W	AEP3	U	-3.92154			-1.40821	-5.75921	0.525085
YEL052W	AFG1	D	0.236281	-0.675665	0.311745	-1.11069	-0.758256	-0.421028
YEL052W	AFG1	D	0.615409	-0.364529	0.135565	-0.893799	-1.29103	-0.00299063
YEL052W	AFG1	U	-1.05592	-0.598334	-0.290904	-0.567432	1.39591	-0.317982
YLR397C	AFG2	D	0.107088	-3.3635	2.03471	-0.198214	-0.585864	1.17587
YER017C	AFG3	D	0.467666	0.0116149	-0.0127247	-0.745706	0.262746	0.439014
YER017C	AFG3	U	0.00650396	-0.729755	-0.901651	-1.37323	-1.01939	-1.6188
YDR085C	AFR1	D	-0.364001	0.659284	0.280551	-0.290892	0.407056	0.305974
YPL202C	AFT2	D	-5.89478	2.49599	0.634849	4.71599	3.41033	3.96733
YPL202C	AFT2	U			0.911295	-0.49436	-2.32683	-2.31786
YNR044W	AGA1	D	-0.49615	0.875086	-0.804015	0.14174	-1.24545	-0.263912
YNR044W	AGA1	U	0.0292796	-0.62666	-0.559896	0.532149	-1.02012	-0.366751
YDR524C	AGE1	D	0.716539	0.781736	0.764886	-0.56469	-2.26334	0.699563
YCL025C	AGP1	D	1.22801	-0.176449	-0.0743669	-0.211301	0.887116	1.11365
YCL025C	AGP1	U	0.156055	0.268009	-0.705536	0.0106044	0.509641	0.00823878
YBR132C	AGP2	D	0.499444	-0.0411452	0.797738	0.280573	1.08175	-0.337819
YBR132C	AGP2	U	-0.178274	-0.300324	1.28131	0.389745	-1.23092	0.106186
YFL055W	AGP3	D	-0.856431	-0.59488	-1.09456	-1.61702	0.15536	-0.692582
YFL030W	AGX1	D	-0.567042	-1.54717	-2.25179	0.968472	-0.276946	-0.928921
YDR214W	AHA1	D	0.557548	0.32824	0.274494	0.165964	0.198811	-0.693531
YDR214W	AHA1	U	0.430424	0.0873341	0.647431	-0.270214	0.589825	0.365096
YOR023C	AHC1	D	0.605771	0.594061	-1.20066	-0.0322967	-0.270462	1.37777
YOR023C	AHC1	U	-0.223249	-0.682054	0.564525	-0.286591	0.187451	0.10696
YCR082W	AHC2	U		2.28005	-0.134717	1.33252	-0.0982024	-1.45165
YLR109W	AHP1	D	-1.90367	-2.44087	-0.10334	1.22748	0.528845	-0.984556
YLR109W	AHP1	U	-1.52188	-0.436677	0.575016	-0.358554	0.163425	-1.1841
YHR093W	AHT1	U	-1.36583	-0.650875	-0.0311034	0.399522	-0.444353	0.0476029
YNR074C	AIF1	D	-0.360214	-0.0694517	0.403087	0.197495	-0.727846	-0.0525878
YNR074C	AIF1	U	-1.07465	1.10219	-0.454786	-1.09265	-0.434201	-0.625949
YMR092C	AIP1	U	1.13103	-1.48425		1.09753	-0.553707	0.635058
YMR092C	AIP1	D	-0.610538	0.26062	-1.31286	-1.35414	-1.45234	-1.31554
YDL175C	AIR2	U	0.0585285	-1.22334	-0.657191	-1.63178	-0.80049	-1.41608
YBR059C	AKL1	D	-0.0482427	0.911131	-0.717163	-0.359738	-0.692134	-1.77489
YDR264C	AKR1	D	1.3356	2.12241	-0.0766828	-0.247942	-0.516544	-1.17977
YDR264C	AKR1	U	0.952576	1.47993	-0.621785	-0.223605	-0.389408	-0.762772
YOR034C	AKR2	D	-0.266093	0.0296775	-0.344515	-0.476946	-0.303471	-0.568224
YOR034C	AKR2	U	0.249349	0.508325	-0.482885	0.337752	-0.456378	-0.0275081
YOR335C	ALA1	D	0.583006	0.430561	-0.798929	1.02394	0.274941	-0.344755
YOR335C	ALA1	U	0.299022	0.694054	-1.95411	-0.717508	1.4308	1.0673
YJL122W	ALB1	U	-0.20958	0.0483073	0.236413	1.54235	1.09812	-0.340068
YMR170C	ALD2	U	0.70922	1.17145	-0.858135	0.0715257	-0.382623	-0.340317
YMR169C	ALD3	D	2.70599	-0.104791		-0.121083	-0.255229	0.232934
YMR169C	ALD3	D	2.04986	-0.125955	2.08537	-0.958792	-0.473179	0.253962
YMR169C	ALD3	D	0.736717	0.750913	1.67151	0.390625	0.279245	0.190662
YOR374W	ALD4	U	0.691756	-0.370838	-0.991636	-0.399129	0.43055	0.950364
YER073W	ALD5	D	0.14095		-1.03745	-0.755472	0.562173	0.048229
YER073W	ALD5	U	-0.71229	-1.21686	-0.899351	-4.21974	-1.41487	1.13706
YPL061W	ALD6	D	0.532094	-1.18896	-0.298663	0.668602	-0.35529	-0.884172
YNL148C	ALF1	D	1.1505	-0.628344	-0.813483	-0.619862	1.4632	-0.638528
YNL148C	ALF1	U	-1.00534	-1.34264	-1.7828	-1.8681	-1.38402	-1.01299
YBR110W	ALG1	D	0.460456	-2.14202	-0.609701	-1.56069	-1.50873	-2.30878
YBR110W	ALG1	U	-1.77471	-1.12799	-1.76189	-3.18116	-2.56295	-2.07811
YNR030W	ALG12	D	-1.86508	-0.0828375	2.83338	-0.505709	-0.372159	-1.09082
YNR030W	ALG12	U	0.653661	0.105571	1.53488	0.682267	0.532661	0.16878
YGL047W	ALG13	D	0.579203	3.27343	0.549672	-0.914208	-0.286359	2.35348
YBR070C	ALG14	U	-2.75856	-1.12599	-0.602448	-0.714697	-0.133799	-0.767766
YGL065C	ALG2	D	-0.141991	0.473339	-0.254337	0.344321	-0.631972	-0.687301
YGL065C	ALG2	U	0.472648	0.384928	-0.702785	-0.232482	0.641598	0.75095
YBL082C	ALG3	U	1.06546	0.665398	1.27696	1.23522	0.110761	0.438963
YOR002W	ALG6	D	-1.1215	0.468386	-0.314918	-3.42069	-0.668163	-0.237861
YOR002W	ALG6	U	-0.740756	0.488989	-1.43808	-0.155725	-0.986433	0.451902
YBR243C	ALG7	D	-0.28701	0.367443	-1.18975	1.06752	-0.840115	0.135479
YBR243C	ALG7	U	-0.924337	-0.821449	0.100288	0.296283	-1.73629	0.0808696
YOR067C	ALG8	D	1.0172	0.00369357	0.0441814	1.50092	-0.595216	-0.296516
YOR067C	ALG8	U	1.0513	0.845382	0.397828	-0.132401	-0.591983	0.18779
YNL219C	ALG9	D	-1.00094	-0.0163443	-1.26144	0.650053	-0.234157	0.197643
YNL219C	ALG9	U	-0.0383986	1.50105	1.15288	0.0527662	0.641721	0.113731
YGL021W	ALK1	D	-1.97437	0.122756	-0.714529	-0.491215	-1.56685	-0.997464
YGL021W	ALK1	U	-0.289486	0.0903595	0.448162	-1.55737	0.400053	0.523568
YML086C	ALO1	D	0.398657	0.810395	-0.382966	-0.402834	0.852812	-0.45485
YML086C	ALO1	U	0.764335	0.331084	0.351522	-0.527648	0.321104	0.0277139
YNL270C	ALP1	D	0.663944	-0.0144962	-0.798102	0.720657	-0.467074	-0.539342
YNL270C	ALP1	U	-0.570045	0.279941	0.497195	0.728697	-0.89329	-0.338864
YOL130W	ALR1	D	-0.811296	-0.406289	-1.39032	-0.263688	0.361392	0.0655432
YFL050C	ALR2	D	1.43156	1.50574	-1.16259	-1.08142	2.42663	1.29452
YFL050C	ALR2	U	0.868304		0.00389849	0.392988	-0.541218	-0.566655
YLR089C	ALT1	D	1.06326	0.0231613	-0.231503	1.47064	0.346346	0.412304
YLR089C	ALT1	U	1.82652	0.637442	0.213887	-0.191066	0.270751	1.41255
YDR111C	ALT2	U	0.717677	0.61078	-2.85991	1.18584	0.490233	0.312196
YGR225W	AMA1	D	1.09193	0.578907	0.631319	1.56202	0.63302	-0.232402
YGR225W	AMA1	U	0.746558	1.5224	0.668984	0.964849	0.537288	1.89415
YML035C	AMD1	D	-0.503058	0.179414	0.800059	0.275695	0.372963	0.239281
YML035C	AMD1	D	-0.276304	-0.568304	0.414357	0.271824	0.324983	-0.140787
YML035C	AMD1	U	0.537057	0.331021	-0.156929	0.222461	0.0908394	0.213419
YDR242W	AMD2	D	0.860574	-0.440462	0.216365	-0.205783	-0.298402	-0.482896
YBR211C	AME1	D	0.224681	-0.392755	-0.411412	0.33732	-0.299402	1.46966
YBR211C	AME1	U	0.62642	-0.215241	0.726051	0.191202	-0.710951	-0.897932
YBR158W	AMN1	D	-0.322701	-2.00931	0.3709	-0.201616	0.200963	-0.894241
YGL156W	AMS1	D	-1.68817	0.156803	-0.684403	-0.361859	-0.212398	0.536084
YGL156W	AMS1	U	0.178909	0.490854	-0.0961649	-0.239815	0.316148	-0.0348504
YJR047C	ANB1	D	-0.771314	0.486787	0.586708	0.498463	0.982857	0.074944
YEL036C	ANP1	U	0.987753	1.04883	-1.10933	-0.894529	-0.748481	0.102618
YPR128C	ANT1	U	1.77705		1.90366	0.808185	1.95768	2.16173
YPR128C	ANT1	D	0.139646	0.518072	0.285132	0.359257	-0.0463517	-0.79671
YPR180W	AOS1	U	1.15017	1.21509	-0.131974	-0.306754	0.912923	1.42666
YCL050C	APA1	U	6.13566		-2.92406	-0.972407	-1.67663	0.818605
YDR530C	APA2	D	-0.478115	-0.404482	0.860532	-0.232227	0.334429	0.822937
YNL172W	APC1	D	0.308919	-1.01812	-1.3232	0.401506	-1.21759	-1.06772
YDL008W	APC11	D	1.37845	0.640937	0.560233	-0.488836	-0.33276	-0.109578
YDL008W	APC11	D	0.737545	0.249841	0.259301	-0.658373	0.125831	-0.424486
YDL008W	APC11	U	0.797293	-0.040539	-0.0497885	-0.363962	0.77335	-0.489844
YLR127C	APC2	D	-0.441679	1.23745	0.0683372	-0.0520927	-0.87191	1.02472
YDR118W	APC4	D	0.779279	0.702626	-0.110515	-0.273707	0.144036	-0.500687
YDR118W	APC4	U	-0.00233348	1.91167	-0.647605	0.797902	-0.543729	-0.53371
YOR249C	APC5	U	0.528807	0.221093	-0.146881	-1.08906	0.865666	-0.882957
YLR102C	APC9	D	1.67068	1.54748	-0.0814002	0.143951	-0.313121	0.438498
YLR102C	APC9	U	0.485019	-0.371395	-1.81839	-1.04214	0.791496	0.0978728
YBR151W	APD1	D	-0.756716	-0.366478	-0.551111	-0.924833	-0.40987	-0.514218
YBR151W	APD1	U	-0.582991	-0.37577	0.481688	-2.06264	-0.378578	0.427861
YKL157W	APE2	U	0.779044	1.85495	1.06589	1.5984	0.846442	0.185655
YKL157W	APE2	D	-0.0499941	-0.221577	0.919938	1.33922	2.78869	0.986569
YBR286W	APE3	D	-0.51304	1.02085	-1.63245	-0.716655	0.227052	0.0749449
YBR286W	APE3	U	-0.0948171	0.319875	-0.231781	0.199917	-0.703507	1.02946
YDR525W	API2	D	-1.71053	0.0163315	-0.224855	0.500343	-0.225796	-0.374546
YDR525W	API2	U	0.0970622	-0.761951	-0.438692	0.761693	-0.851974	0.471467
YNL077W	APJ1	D	-0.462421	-0.253411	1.48585	0.179467	1.18978	-3.13286
YNL077W	APJ1	U	-0.27334	-1.99925	-0.462873	-0.7133	-0.442571	-0.212768
YJR005W	APL1	D	0.697097	0.179197	-0.84418	1.66124	0.860594	-0.970901
YJR005W	APL1	U	-0.387475	0.766665	-0.511349	0.458569	0.778952	-0.911657
YKL135C	APL2	U	0.538522	1.88174		-0.469359	-0.682607	0.445205
YBL037W	APL3	D	-0.470663	1.27394	0.542183	-0.331064	0.0803677	-0.345337
YBL037W	APL3	U	0.574402	0.625749	-0.332262	-0.760274	0.191704	1.1172
YPR029C	APL4	D	0.819559	-0.166895	-0.352284	-0.734041	0.144568	-0.640358
YPR029C	APL4	U	-0.642567	-0.563964	0.197165	-0.0478167	0.970817	-0.88559
YPL195W	APL5	U	-0.137567	0.994846	0.26843	-0.206512	1.00312	-1.65869
YPL259C	APM1	D	0.291672	-0.351588	1.63816	-0.237779	0.35288	1.95124
YPL259C	APM1	U	0.887019	-1.91093	0.161526	0.318602	-0.199993	1.2566
YHL019C	APM2	D	-0.470166	0.107739	-0.713723	0.0222933	-0.710604	0.952506
YHL019C	APM2	U	0.464338	1.90297	0.874925	1.50364	0.614221	0.687625
YBR288C	APM3	D	0.740977	0.522481	0.511506	0.478519	0.521666	0.599988
YBR288C	APM3	U	0.172314	-0.0877975	0.317951	-0.390466	-0.70883	0.759702
YOL062C	APM4	D	-1.01039	0.896633	0.219239	0.19769	0.365104	-1.62846
YOL062C	APM4	U	-1.12362	0.216515	0.975895	1.05428	0.799507	0.430854
YKL114C	APN1	U	-1.2364	-0.0166717	0.888798	-0.762964	-0.401609	-0.112775
YBL019W	APN2	D	0.697924	0.786881	-1.39093	0.954546	0.475399	1.52486
YBL019W	APN2	U	-1.44173	0.788071	0.352631	0.676794	-1.00924	0.10678
YNL094W	APP1	U	-0.629148	-0.960563	-1.03869	-1.69057	-1.06108	-1.49805
YIL040W	APQ12	D	0.140852	0.583884	0.976703	0.381129	1.46795	-0.624047
YIL040W	APQ12	U	0.910389	0.0824923	0.697219	0.180188	1.15534	0.978861
YJL075C	APQ13	D	0.27533	0.125574	-0.329972	0.194239	-1.18498	0.0807496
YLR170C	APS1	D	0.0850054	0.478268	-0.0396286	-0.719511	0.981868	-1.46073
YLR170C	APS1	U	0.792918	0.561497	1.01409	0.555586	-0.0625167	-0.0239395
YJR058C	APS2	D	1.13353	0.432642	0.765016	-0.391962	0.00923354	-0.948119
YJL024C	APS3	D	2.05739	1.29405	0.141151	0.981994	1.92228	0.577446
YJL024C	APS3	U	0.49156	-0.113807	0.638226	0.957194	0.227327	0.297952
YML022W	APT1	D	1.52647	-0.550673	-0.380681	0.564882	-0.104984	-0.555543
YML022W	APT1	U	0.254645	0.022567	0.733189	0.262934	1.24988	0.0564207
YNL065W	AQR1	D	0.892241	0.507881	0.937702	-0.358353	1.15705	0.304398
YNL065W	AQR1	U	-0.7025	-0.88599	0.71949	0.65754	-0.408453	0.981211
YPR192W	AQY1	U	2.6148	1.78495	1.26541	0.765432	0.770022	0.937756
YPR192W	AQY1	D	1.98815	0.482344	0.670719	-0.390692	-0.0315078	0.523626
YLL052C	AQY2	D	-0.176388	1.74339	-1.41442	1.30847	-1.36977	0.780577
YLL052C	AQY2	U	0.354978	0.881488	0.0950245	0.285708	0.418639	1.26841
YBR149W	ARA1	D		-1.23449		-0.0352442	-1.66108	0.264673
YBR149W	ARA1	U	-0.647031	2.93379	1.55943	-5.14516	-0.410357
YER036C	ARB1	D	-0.307952	0.288076	-0.0489575	0.46318	0.230139	-0.559718
YER036C	ARB1	U	2.35228	0.66851	1.05151	0.76721	-0.283356	0.351309
YGL105W	ARC1	D	0.250974	-1.03954	0.244003	-0.407584	-0.10454	0.777657
YIL062C	ARC15	D	-1.89267	0.162462	0.467186	-0.785072	-0.110206	0.249644
YLR370C	ARC18	D	-0.238496	1.05506	-0.927836	-0.089087	0.412281	-0.0666125
YLR370C	ARC18	U	-0.341738	-0.212146	-0.735438	0.420807	1.21923	0.424554
YKL013C	ARC19	D	1.30139	0.0314118	0.536914	0.777629	0.537154	-0.0104419
YKL013C	ARC19	U	0.112143	-0.151122	-0.499289	0.496774	0.400766	0.214926
YBR234C	ARC40	D	-0.192182	-0.990511	-0.754247	0.0304999	-0.671145	0.789499
YBR234C	ARC40	U	1.16055	-0.196501	-0.362945	0.759789	0.036529	-0.458574
YHR013C	ARD1	D	0.307697	1.9186	-0.368453	-1.50242	-0.256029	-0.341956
YHR013C	ARD1	U	-1.01912	-0.533094	-0.343177	0.281752	0.0189576	-0.13126
YCR048W	ARE1	D	-0.67093	-0.861471	0.024992	0.273343	0.868782	-0.125778
YCR048W	ARE1	U	-0.247623	1.46427	0.41531	0.0449441	-0.159953	-0.471051
YDL192W	ARF1	U	0.718028	-2.20151	-0.301734	1.00352	-1.93279	-1.76232
YDL137W	ARF2	D	-0.960707	0.304983	-0.149657	0.562068	-0.537616	-0.635125
YDL137W	ARF2	U	-0.980841	-0.283442	0.509313	0.778552	-0.659828	0.117196
YOR094W	ARF3	D	-0.311391	-0.189175	0.320586	1.55789	-0.15943	-0.483796
YOR094W	ARF3	U	-0.77285	0.312882	0.114712	-0.623552	0.367064	0.0978113
YOL058W	ARG1	U	1.78016	-0.0295679	1.07104	-0.326793	0.0568442	2.3367
YOL058W	ARG1	D	1.43133	0.98297	0.577118	1.1868	-0.620924	-0.302161
YJL071W	ARG2	D	-0.0634596	-3.59597	-0.770516	2.90726	-0.722043	-1.11721
YJL088W	ARG3	D	-0.387817	0.271756	0.042212	0.16545	-0.747781	-0.48094
YJL088W	ARG3	D	0.540959	0.887935	1.13465	0.375928	0.391088	-0.335563
YJL088W	ARG3	U	-0.0255235	-0.342537	0.993371	-0.204533	-0.165042	0.346669
YHR018C	ARG4	D	0.919117	-0.40914	-1.53742	-0.623253	0.075295	1.24847
YER069W	ARG5,6	U	0.458909	-0.096068			-0.313753	1.35738
YER069W	ARG5,6	D	0.794265	-0.625395	0.122001	0.128542	-2.45123	-0.678735
YMR042W	ARG80	U	-0.779969	0.704611	1.53333	-0.437707	-1.03892	1.80889
YML099C	ARG81	D	-1.32766	-0.619582	-0.710434	-1.40094	-1.68477	-2.66788
YML099C	ARG81	U	-1.77743	-0.292635	-2.32232	-3.34872	-1.40133	0.894497
YDR173C	ARG82	D	-0.797005	-0.13294	0.193123	-0.550186	-0.353968	-1.05821
YDR376W	ARH1	D	0.92213	0.765099	-0.0572195	-0.99998	1.61359	-0.333186
YDR376W	ARH1	U	-1.45544	0.746038	-0.916409	0.0401733	-0.273248	0.210415
YNL020C	ARK1	D	-0.91475	-0.249459	0.491234	0.385235	0.0540818	-0.796559
YNL020C	ARK1	U	0.0951716	-0.0965018	0.233857	-0.716404	0.159491	1.45242
YBR164C	ARL1	D	-0.36691	-0.373	-0.658621	0.222385	-0.45952	0.213267
YBR164C	ARL1	U	-0.908359	0.730894	1.50468	0.129392	-0.00570125	-0.0699901
YHL047C	ARN2	U	0.475402	1.06536	-0.649409	0.521889	1.13715	1.66953
YHL047C	ARN2	U	0.40935	-1.55281	-1.75318	2.03821	1.13464	3.98901
YHL047C	ARN2	D	-1.11105	1.31648	0.291272	0.347616	-0.183669	1.29297
YDR127W	ARO1	D	-0.121966	-0.896731	-1.51042	-0.192372	0.547322	1.14838
YDR127W	ARO1	D	-0.0381384	-0.880939	-1.30287	0.526893	-0.621122	1.79657
YDR127W	ARO1	U	-0.293105	-0.721465	-0.770443	0.519763	0.271498	-1.96105
YDR380W	ARO10	D	0.604807	-0.948768	-1.17958	-0.563683	0.862025	0.867897
YGL148W	ARO2	D	-0.174144	-0.194318	-1.4214	0.479332	-0.0205942	-0.598459
YGL148W	ARO2	U	-0.681971	0.278098	-1.99316	0.0686466	-0.247484	-0.178435
YDR035W	ARO3	D	0.397197	-1.19726	0.869454	0.685442	-0.0458921	-0.884374
YBR249C	ARO4	D	-1.29585	-0.500254	-0.181813	0.336877	0.0023265	0.160535
YBR249C	ARO4	U	0.978051	1.09344	-0.0231651	-0.582145	0.373722	1.24034
YPR060C	ARO7	D	0.12249	-0.774508	0.307035	0.116124	-0.383395	0.697466
YPR060C	ARO7	U	0.648874	-0.29631	0.748594	-0.778249	0.659411	0.80368
YGL202W	ARO8	D	-0.30979	-0.451763	0.466065	0.00457178	0.391972	-0.26071
YDR421W	ARO80	D	-0.333505	-0.0279884	0.841294	-0.0604615	0.0661703	0.243445
YHR137W	ARO9	D	0.248584	-0.154761	0.371634	1.23309	-0.040481	-0.323549
YHR129C	ARP1	D	0.207692	0.767717	-0.627236	0.203112	0.535518	-0.35765
YHR129C	ARP1	U	-0.350444	0.109413	0.188549	0.344994	0.297634	-0.964907
YDL029W	ARP2	D	1.3056	1.29324	-0.338411	-0.193654	-0.247826	0.992532
YDL029W	ARP2	U	0.53253	0.745126	0.191057	0.6725	-0.403059	-0.730115
YJR065C	ARP3	D	-1.03705	0.435674	0.442505	-0.0924291	0.262163	0.310986
YJR065C	ARP3	U	-0.132909	0.151909	-0.115491	-0.139651	0.516208	-0.328614
YJL081C	ARP4	U	0.330947	-0.687364	-0.321703	0.204165	-0.309901	-1.78405
YLR085C	ARP6	D	-0.295099	0.781496	-0.328323	-0.384343	1.53042	-0.236003
YLR085C	ARP6	D	-0.124006	1.27295	-0.0927457	-1.11805	1.52657	-0.340221
YLR085C	ARP6	U	-0.251215	0.672077	0.622956	-1.73018	-0.180534	0.415622
YPR034W	ARP7	D	0.717404	-0.847186	-3.03055	0.705034	-2.54877	-0.551571
YPR034W	ARP7	U	-0.503105	-2.08897	0.2908	-1.41928	0.80609	-0.12517
YOR141C	ARP8	U	1.32196	2.15358	0.8171	1.09474	1.17842	1.21254
YOR141C	ARP8	D	0.611401	-0.228701	0.58819	0.960935	-0.340914	-0.558195
YMR033W	ARP9	U	-1.36498	-0.609314	1.10116	0.56471	-0.620906	-0.242618
YMR033W	ARP9	U	0.152346	-0.500342	-0.640726	0.155935	0.141916	-1.57125
YMR033W	ARP9	D	-0.127957	-2.04327	-1.02495	0.93215	0.0461604	-1.89852
YPR199C	ARR1	D	0.540978	-1.24179	-0.296309	-0.397088	0.0514034	0.752797
YPR199C	ARR1	U	-0.414105	-0.597091	0.0526784	-0.75549	-0.87016	0.235239
YPR200C	ARR2	D	-0.206588	1.84927		0.327423	0.291341	0.117761
YPR200C	ARR2	D	-0.341634	-0.0852326	-0.403403	-1.32141	-0.398102	-0.713166
YPR200C	ARR2	U	1.98036	-0.384935	1.09139	0.69039	0.913758	0.394818
YPR201W	ARR3	D	0.890858	-0.0265051	-0.803324	-0.342511	-1.3794	0.327285
YPR201W	ARR3	U	1.08971	0.44037	-0.90308	-0.416795	-0.402713	0.830555
YLR242C	ARV1	D	0.602825	0.61826	-0.0279932	1.93164	0.600391	-2.32594
YLR242C	ARV1	U	-1.43234	1.35991	0.429952	0.57002	1.63357	0.326149
YDR101C	ARX1	D	-0.544731	0.28693	-1.21383	-0.153522	0.226273	1.35502
YDR101C	ARX1	U	-1.85945	0.988684	0.526452	-0.0543961	-2.03677	-0.17152
YMR116C	ASC1	D	-0.0507845	-0.166965	1.0258	0.938208	0.109054	0.752716
YOR058C	ASE1	D	0.335586	-0.666375	-0.721665	2.34112	-0.197126	1.17205
YOR058C	ASE1	U	0.547789	0.773326	-0.24967	0.623425	-0.12681	0.0476854
YJL115W	ASF1	D	0.132562	0.682193	-1.14337	0.721768	0.489968	0.723093
YDL197C	ASF2	D	0.843041	-0.508453	0.505236	-0.443408	-0.36708	-0.0349506
YDL197C	ASF2	U	0.649051	0.575984	0.0916036	1.54248	-0.13358	0.930399
YIL130W	ASG1	D	-1.24154	0.135868	0.26113	-0.0958647	0.185983	0.542666
YIL130W	ASG1	U	-0.212265	-0.989013	0.757933	-0.796675	-0.865441	0.756627
YJL170C	ASG7	U	-0.641665	0.426943		0.59085	0.351856	0.394172
YKL185W	ASH1	D	0.489163	-1.13286	0.202031	-0.0619057	0.198244	0.146896
YKL185W	ASH1	U	-0.571912	-1.07752	0.213521	0.62388	0.949538	-0.180104
YMR119W	ASI1	D	-1.13187	0.448528	-0.227418	-0.371254	0.371972	-0.276193
YNL159C	ASI2	D	-0.086902	-0.679391	-0.414338	0.536181	0.701228	-0.929916
YNL159C	ASI2	U	0.200858	-0.349189	0.657213	0.180272	-1.06324	-0.498668
YKL052C	ASK1	D	-0.706835	-0.422551	0.253837	0.193516	0.978969	-0.290489
YKL052C	ASK1	U	0.430622	0.740922	-0.130315	-0.28248	-0.00768688	-0.117977
YGR097W	ASK10	U	0.555054	0.624096	-1.02263	0.376523	1.07285	-0.766234
YDL088C	ASM4	D	-0.592189	0.00453093	0.98211	-0.286507	1.17169	0.288504
YDL088C	ASM4	U	0.16245	-1.38566	0.204675	-1.43516	0.134089	-0.124464
YPR145W	ASN1	D	-0.887092	0.485663	0.460964	-0.0612518	-1.44317	-0.280697
YPR145W	ASN1	D	-0.91918	0.530237	0.686638	-0.355473	-1.35463	0.748876
YGR124W	ASN2	D	0.947576	-0.404012	-0.692535	0.0312919	-1.05605	-1.22657
YGR124W	ASN2	U	-0.0929689	0.733196	1.01365	0.704746	0.194209	0.194383
YDR321W	ASP1	D	1.17805	0.891597	-0.168509	0.752765	0.600333	0.0629907
YDR321W	ASP1	U	0.634227	0.49386	-0.216334	-0.955424	-1.25245	0.436339
YPR093C	ASR1	D	-0.191789	-0.664769	-0.190828	-0.488378	0.104215	-0.0322034
YPR093C	ASR1	U	0.380717	-0.529429	-0.257297	0.51756	0.0300168	-1.34222
YER101C	AST2	D	-0.273619	0.254648	-0.514874	0.0806203	-1.84054	-0.545495
YER101C	AST2	U	1.46861	0.876509	0.533026	0.184756	-0.293679	1.25093
YDR184C	ATC1	U	0.0790238	0.579899	-0.655846	1.00182	-0.18891	-1.09507
YGL017W	ATE1	U	-0.311724	0.48167	0.620529	-0.144457	0.481143	-0.166183
YGL017W	ATE1	D	-1.36528	-0.201429	-1.30216	-1.6686	0.670845	0.0323952
YOR377W	ATF1	D	0.871055	0.424998	1.03616	-1.95076	-1.7015	0.578139
YOR377W	ATF1	U	-0.0549462	0.133797	-1.01198	-0.259399	-0.693827	-1.18762
YGR177C	ATF2	U	-0.662942		0.656318	-0.669955	1.92596
YGR177C	ATF2	D	0.589893	0.289609	-0.777392	-0.933191	-0.353246	0.934078
YGL180W	ATG1	D	-1.22404	-0.808167	-1.32321	-0.799201	-0.333572	-0.612438
YLL042C	ATG10	D	-0.353406	0.449456	0.428243	-1.74398	0.733102	0.218638
YLL042C	ATG10	U	0.361155	0.703685	0.0488744	-0.337534	-0.22476	-0.942229
YPR049C	ATG11	D	-0.897642		0.143835	-1.26967	-0.637901	0.26991
YPR049C	ATG11	D	-0.0301846	-0.50549	-0.701675	-0.895639	-1.02491	0.331819
YPR049C	ATG11	U	-1.59865	-0.34203	0.646761	-0.0361445	0.463038	0.0276527
YBR217W	ATG12	D	0.37272	0.726257	-0.923559	-0.517418	0.085934	0.645961
YBR217W	ATG12	U	-0.800656	0.116403	0.0740479	0.805613	-0.449926	-0.103168
YPR185W	ATG13	D	0.0606265	0.158904	-1.56257	1.58547	0.213461	-0.574959
YPR185W	ATG13	U	0.395481	3.05097	0.162165	0.986601	0.469774	0.970807
YBR128C	ATG14	D	-0.563812	-0.0867232	0.541259	-0.433505	0.662588	0.313119
YBR128C	ATG14	U	0.0154914	-0.19339	-0.740544	-0.11161	0.717846	0.187756
YCR068W	ATG15	D	-0.87135	-2.88575	-1.07993	-0.860254	-0.199532	-0.0273262
YCR068W	ATG15	U	1.2497	0.299112	-0.726976	-1.04984	-2.06016	0.548105
YMR159C	ATG16	D	0.272742	-1.1534	-0.0438219	0.452473	-0.353508	-0.561241
YMR159C	ATG16	U	0.56643	-1.23625	0.510239	0.336276	-0.0622755	0.484949
YLR423C	ATG17	D	0.840398	0.967152	0.455652	0.0857131	-0.768595	-1.05092
YFR021W	ATG18	D	0.597669	-1.16046	0.136758	0.186999	0.298704	-0.229137
YOL082W	ATG19	D	-0.609536	0.502077	-1.22075	-0.56963	-0.380136	0.56653
YOL082W	ATG19	U	0.109601	-0.739771	0.492362	-0.626324	1.20279	-0.708087
YNL242W	ATG2	D	1.65521	-1.53842	-0.390201	2.68933	0.37823	-0.928643
YNL242W	ATG2	U	0.326171	-0.482924	-0.0393926	0.253368	0.0357023	1.31965
YDL113C	ATG20	D	0.0996006	-0.0488404	0.476164	-0.377962	0.729352	-0.491607
YPL100W	ATG21	D	-0.413556	-1.464	-1.94399	0.542562	0.990354	1.3103
YPL100W	ATG21	U	1.00555	0.0650723	0.400293	0.176301	0.893107	0.95527
YCL038C	ATG22	U	1.02611	-0.0324738	0.309652	1.20856	1.02435	-0.25762
YCL038C	ATG22	U	0.654978	1.08797	0.0998478	1.01294	1.087	0.90551
YCL038C	ATG22	D	-0.222075	-0.0300055	0.129743	-0.916893	-0.341325	-0.0147639
YCL038C	ATG22	D	0.839071	-0.999052	-0.567562	0.572378	1.49953	0.14239
YCL038C	ATG22	U	0.260454	0.332003	-0.00195441	-0.338174	0.050468	0.198834
YLR431C	ATG23	U	0.106332	-1.27308	-0.606673	0.694112	-0.297826	-0.876097
YLR189C	ATG26	D	1.8614	0.24779	-0.697515	-0.0434076	0.589812	0.024042
YLR189C	ATG26	U	-2.11186	0.43565	-0.900279	-0.0761821	-0.632501	-0.0416224
YJL178C	ATG27	D	0.112177	-0.127534	-0.75076	0.84205	-2.74745	-0.316638
YJL178C	ATG27	U	-0.442665	-0.0180959	0.06773	0.75112	0.988969	-0.128207
YPL166W	ATG29	D	0.352748	0.192975	-0.137102	0.356642	-0.743178	1.9629
YPL166W	ATG29	U	1.5445	-0.0259251	-1.40464	-0.119407	-1.70359	-0.175034
YNR007C	ATG3	U	-0.821496	0.584752	0.648267	1.81906	-0.563008	-0.446104
YNL223W	ATG4	U	-5.0063	-4.53525	-6.29255	-3.8897	-5.1787	-5.08886
YPL149W	ATG5	U	-1.35225	-0.286471	-1.50455	0.387526	-0.586881	-0.503283
YHR171W	ATG7	D	-0.416191	-1.15157	0.685254	-0.0454146	0.557304	0.24247
YHR171W	ATG7	U	-0.278156	0.189724	0.594369	-0.635951	0.539015	-0.577164
YBL078C	ATG8	D	0.703098	-1.76734	-0.494575	-1.18193	-0.444443	-0.78544
YBL078C	ATG8	U	-2.06226	0.807948	0.333208	-0.19101	0.124982	-0.303804
YDL149W	ATG9	U	-1.03201	-0.200127	0.332264	0.70494	0.420678	0.652385
YDL149W	ATG9	D	-1.44994	-1.58724	-1.41333	-0.0889266	-0.621321	-0.227321
YPR026W	ATH1	D	-1.92512	1.41001	1.78851	1.25278	-0.022081	-2.17269
YMR301C	ATM1	D	0.0935411	-0.606366	-0.962037	-0.475551	0.718985	-0.0811155
YMR301C	ATM1	U	-0.820769	0.0272468	-0.0622264	-0.596833	-0.835087	0.0119733
YNR002C	ATO2	D	-2.63667		1.18498	-0.316535	-1.20373
YDR384C	ATO3	D	-1.90871	0.812249	3.29403		-2.28618	0.152106
YBL099W	ATP1	D	-1.83863	-1.33689	-4.489	-0.0826669		0.739287
YLR393W	ATP10	U	-0.518035	0.549163	0.355863	0.715242	-0.0152181	0.74977
YNL315C	ATP11	U		1.32228		1.95128	1.70278	2.99702
YNL315C	ATP11	D	1.67001	1.16625	0.864285	0.0397692	0.570495	0.628961
YNL315C	ATP11	U	-0.31328	-0.450511	0.818341	-1.13384	0.00932028	0.237071
YJL180C	ATP12	D	1.18568	0.118596		0.789915	0.863612	0.384511
YJL180C	ATP12	U	-0.480021	0.768996	-0.891421	1.36799	0.361606	1.19484
YLR295C	ATP14	D	0.667489	-0.0667624	-0.878598	1.11698	0.0229006	0.245512
YPL271W	ATP15	U	1.29427	-1.00752	0.661022	0.164743	0.169673	0.111057
YDL004W	ATP16	U	-1.60667	1.70873		0.535232		-0.592616
YDL004W	ATP16	D	1.84998	-1.50161	-1.13063	-2.63988	-2.15302	-1.8831
YDR377W	ATP17	D	-0.809209	-0.895199	0.0289454	-0.525039	-0.708902	-1.14834
YDR377W	ATP17	U	0.331636	0.256745	0.807286	0.406771	-0.48367	0.0919802
YJR121W	ATP2	D	0.822342	2.22127	-0.291143	1.23527	0.655323	1.13494
YJR121W	ATP2	D	0.723891	2.91904	-0.426332	1.36646
YJR121W	ATP2	U	1.14337	0.475353	-0.138966	0.704447	1.10082	0.387956
YJR121W	ATP2	U	-0.271035	0.599594	0.123085	-0.157273	0.745213	0.0536147
YPR020W	ATP20	D	0.162097	1.21255	0.353207	-0.164831	0.814253	-0.337932
YPR020W	ATP20	U	0.410306	-0.0345161	-0.538111	-0.161535	-0.333533	-1.09891
YBR039W	ATP3	U	-2.46405			-0.413662	0.198851	-1.6863
YBR039W	ATP3	D	-0.565985	-0.357959	0.419801	-0.623422	0.0795116	0.383027
YPL078C	ATP4	D	0.3164	0.824682	0.0730321	0.113099	0.55266	-0.771914
YPL078C	ATP4	U	1.05827	-0.15931	-0.981792	1.21804	-0.0684946	0.712674
YPL078C	ATP4	U	0.256515	0.736946	0.370079	-0.124293	1.52911	-0.0695231
YPL078C	ATP4	U	0.0462079	0.554771	0.351458	-0.106845	1.32143	0.0485187
YDR298C	ATP5	D	-0.694595	0.569786	-0.719173	0.174884	0.083579	-0.458499
YDR298C	ATP5	U	0.257215	0.460919	-0.610857	-0.0728507	1.11923	1.19878
YKL016C	ATP7	U	-1.71755	-0.744706	0.212551	-0.608254	-0.136539	0.876761
YML116W	ATR1	D	0.14809	1.12905	0.749805	-0.138798	1.0294	1.59333
YML116W	ATR1	D	0.646914	0.633064	-0.0656243	0.404513	0.663811	1.90949
YML116W	ATR1	U	-0.0702056	-0.195589	0.0572508	0.19455	0.0402799	0.710436
YAL020C	ATS1	U	1.62825	0.0476259	-0.581321	-0.026586	0.63639	2.52241
YNL259C	ATX1	D	1.2994	-0.210104	2.11963	0.983588		0.394767
YNL259C	ATX1	D	0.907714	-1.11947	-0.740998	-0.427281	-0.397185	0.107465
YNL259C	ATX1	U	-0.391919	-1.03412	0.348039	0.444117	-1.51801	-1.74184
YOR079C	ATX2	D	1.56506	1.02275	0.967613	-0.172684	-0.118877	-0.567451
YOR079C	ATX2	U	0.119603	0.382117	0.948999	0.707049	-0.0779	-0.409232
YKL004W	AUR1	U	-1.0999	0.0470864	1.34513	-0.398218		-0.410453
YKL004W	AUR1	D	0.0223372	-0.0274875	0.807729	0.100864	0.480327	0.358215
YOR011W	AUS1	D	-0.625442	-0.727088	0.635257	-0.590613	0.278946	0.316052
YOR011W	AUS1	U	-0.369421	0.103105	-0.467994	-0.274559	-1.47501	-1.01403
YLR114C	AVL9	D	0.824997	-0.575671	0.550663	-0.22968	0.923496	0.9851
YLR114C	AVL9	U	0.379694	-1.01874	2.24487	-0.00655732	0.41313	0.165788
YOL078W	AVO1	D	-0.33579	-0.662585	0.094983	1.01332	-0.349462	0.269379
YOL078W	AVO1	U	1.10894	-0.395034	-0.0707579	0.366848	-0.20519	0.0132114
YMR068W	AVO2	D	-1.37157	0.562007	0.47703	0.351875	0.650697	-1.21589
YMR068W	AVO2	U	-0.176004	1.01835	-1.01349	0.0901246	-0.964598	0.298162
YJR001W	AVT1	U	0.243066	1.26643	0.601732	1.02785	1.19972	-0.211368
YJR001W	AVT1	D	0.433349	0.333414	-1.66884	1.18448	-1.21742	-0.571651
YEL064C	AVT2	D	0.920055	1.16943	-0.259956	-0.26302	1.14587	0.385488
YEL064C	AVT2	U	-1.15697	-2.41604	-0.135932	0.278654	0.175811	-0.13981
YKL146W	AVT3	U	0.409944		-0.78607	0.470006		0.227521
YKL146W	AVT3	D	0.757871	0.295269	0.458614	-0.561842	-1.19742	-1.66218
YNL101W	AVT4	D	2.31904	0.73614	-0.0349777	-0.273511	0.361776	1.27714
YNL101W	AVT4	D	2.22409	1.37369	0.196268	-0.0664072	0.900044	0.919383
YNL101W	AVT4	U	0.192592	0.231848	0.214633	-0.689225	0.0513855	-0.430182
YBL089W	AVT5	D	0.039103	0.194938	0.459633	0.411479	-0.325106	0.627305
YBL089W	AVT5	U	-0.226859	-0.403864	-0.0447338	0.804004	0.286948	-1.00947
YER119C	AVT6	D	1.82806	0.831829	-0.968739	0.956443	-0.32954	-0.754397
YER119C	AVT6	U	-1.4545	0.732958	-0.229854	-1.44724	0.544903	0.125516
YIL088C	AVT7	D	0.259383	-0.149547	0.137244	0.864917	0.239076	0.572434
YIL088C	AVT7	U	0.101863	0.882126	-0.399398	-1.77307	-1.15252	0.719685
YPR122W	AXL1	D	-0.541287	-0.361434	0.552642	0.224645	-1.14688	0.620524
YIL140W	AXL2	D	-0.156235	-0.506711	-2.00898	1.61808	-0.897726	0.362504
YIL140W	AXL2	U	-0.583442	0.360285	-0.976498	-0.147276	-0.763963	0.25399
YIL124W	AYR1	D	-0.990691	-0.508484	0.697248	-0.0559337	-0.568825	-0.31114
YIL124W	AYR1	U	0.537343	0.764785	0.64495	-0.899739	-0.452146	-0.214778
YLL063C	AYT1	D	-0.254083	-0.186838	1.20982	-0.298592	-3.13041	0.612905
YOR113W	AZF1	D	-0.513074	-0.690957	-0.256464	-0.48541	-0.569814	-1.88414
YOR113W	AZF1	U	-0.846519	0.496665	-0.0770367	-1.17077	0.469393	0.947694
YGR224W	AZR1	D	0.744959	0.998151	-0.839035	-0.227877	-0.565598	0.101934
YGR224W	AZR1	U	-4.59111	-3.8806	-5.07489	-3.94361	-3.04528	-1.59124
YOR134W	BAG7	D	0.335203	2.14859	0.751154	1.03819	-0.73925	0.85031
YBR068C	BAP2	D	-1.20289	1.18942	2.54133	-0.480638	2.14969	1.09074
YBR068C	BAP2	U	0.924839	-0.188204	1.31579	1.00152	0.160005	-0.696515
YIL015W	BAR1	D	-0.0744258	0.363483	0.274541	-0.127114	0.166798	0.00873669
YKR099W	BAS1	U	0.192288	-0.433707	0.677789	1.04916	0.405172	0.477078
YJR148W	BAT2	D	1.16869	0.800553	-0.399882	-0.216822	0.388551	-0.164642
YJR148W	BAT2	U	0.162462	0.11336	0.831111	-0.217156	0.280497	0.269874
YJL020C	BBC1	D	1.9036	2.48646	0.243354	-0.26271	0.865649	-1.30295
YJL020C	BBC1	U	-0.0186845	0.789165	0.865214	1.10271	1.00156	-1.29322
YPL255W	BBP1	D	-0.620295		-0.0126849	1.38371	0.291545	0.175207
YPL255W	BBP1	U	-0.567657	1.46385	0.944899	0.763421	-0.127385	1.04505
YHR040W	BCD1	D	0.0754799	-0.0535439	-0.0232066	0.210784	0.477564	-0.943389
YMR237W	BCH1	D	1.12291	-0.242826	0.355256	-0.654793	0.91271	0.145126
YMR237W	BCH1	U	-1.28496	-0.0688122	-0.143195	0.0134193	-0.631114	-0.389822
YJL095W	BCK1	D	-0.662808	-0.383338	0.128548	0.182874	-0.429102	0.0606944
YJL095W	BCK1	U	0.033778	-0.435025	-0.718449	-1.258	0.323277	-0.633979
YER167W	BCK2	D	-0.421515	1.06083	0.471514	0.70933	-0.597531	-0.121604
YER167W	BCK2	U	-1.17094	0.923256	-0.461115	0.199257	0.542623	-0.348012
YDR361C	BCP1	D	0.075097	-0.0545515	0.291067	0.580778	0.112518	-0.934084
YDR361C	BCP1	U	0.288792	0.405903	0.520163	0.226971	0.657688	-0.912342
YDR375C	BCS1	D	-0.586871	1.27938			0.699987	-0.236338
YLR399C	BDF1	D	0.906317	-1.96616	-0.711653	-0.215142	-1.44717	-0.95486
YLR399C	BDF1	U	-1.29736	0.260559	-1.15754	0.310106	0.694138	1.21577
YDL070W	BDF2	D	0.0655493	0.318644	-0.448166	-0.428836	-0.778662	0.817627
YDL070W	BDF2	U	0.535333	1.02034	0.585153	-0.175121	0.569736	1.49035
YAL060W	BDH1	U	-0.187496	0.13827	-0.466381	0.649543	-0.665555	0.178101
YBR200W	BEM1	U	0.0167368	0.672774	-1.1737	0.0792987	-0.358323	1.42575
YER155C	BEM2	D	-0.132299	-0.705752	-1.23414	-0.381456	0.0745813	-0.443649
YER155C	BEM2	U	-0.10359	-0.770906	-1.72739	-1.83242	-2.12064	-0.643087
YPL115C	BEM3	D	0.195283	-1.09872	-0.105283	0.918137	0.0474234	-0.879876
YPL115C	BEM3	U	0.02029	0.121418	2.13189	0.799952	-0.855995	-1.10566
YPL161C	BEM4	D	-0.397299	-2.23548	0.329313	0.72902	-0.531113	1.89697
YPL161C	BEM4	U	-0.0882974	-0.142789	-0.374246	-0.222712	0.163061	0.573448
YIL004C	BET1	U		0.699963	-0.991991	0.0230285	-0.0107818	0.754604
YIL004C	BET1	D	-1.63776	0.6978	-0.0686056	0.233339	1.69705	0.0504925
YPR176C	BET2	U		0.981014	-0.325286	-0.238235	0.640803	1.5165
YPR176C	BET2	D	-1.86009	0.0927945	1.10206	-0.492348	-0.656969	-0.00962041
YJL031C	BET4	D	-0.203142	0.0453345	0.096665	-0.0128496	0.049253	-0.195113
YJL031C	BET4	U	0.103889	0.174698	1.81835	-0.114808	0.0840664	-0.312188
YML077W	BET5	D	0.052811	0.895913	0.821183	0.57912	-0.425839	-0.667113
YML077W	BET5	U	1.07085	-0.0342098	0.676697	0.18466	0.424276	-0.119013
YML077W	BET5	U	1.00092	0.109304	0.452371	0.565265	-0.47452	0.0850595
YJR053W	BFA1	D	0.173817	0.626289	-1.93813	-0.821968	0.518761	0.554706
YJR053W	BFA1	U	0.322935	0.635574	0.124758	-0.57397	-0.604786	-1.35752
YOR198C	BFR1	D	1.39117	-0.59709	1.55924	0.561605	-0.952782	-0.279214
YOR198C	BFR1	U	1.66264	0.936986	-0.405328	0.533961	0.748909	0.916272
YDR299W	BFR2	U	1.09859	2.32406	2.31756	1.91574	1.29984	0.863413
YDR299W	BFR2	D	-0.434379	-0.806727	0.395989	-1.18036	-0.307074	0.288865
YGR282C	BGL2	D	0.806818	-0.841465	-0.624317	-1.34291	-0.72925	-0.87575
YHR101C	BIG1	U	-0.29671	0.885256	-1.01618	-1.05138	-2.10895	-0.438005
YCL029C	BIK1	D	-0.429639	-0.0255521	0.0371993	0.153611	-0.2739	-1.09663
YCL029C	BIK1	U	-0.0381429	0.134329	0.949339	-0.536498	0.143978	-0.544132
YER016W	BIM1	D	0.790956	0.241291	-0.00292402	0.0157751	0.725403	-1.18453
YER016W	BIM1	U	1.90784	0.599423	-0.411343	0.0188429	-0.155228	1.62836
YGR286C	BIO2	D	1.179	-0.368135	-0.996275	-1.36858	-0.203222	-0.77957
YGR286C	BIO2	U	-0.229987	-0.630219	-1.92929	1.22205	0.693309	1.1219
YNR058W	BIO3	D	1.19383	0.574406	-0.42472	-1.01177	0.14814	0.745255
YNR058W	BIO3	U	-0.0561277	0.640705	-0.561497	0.895654	-1.08623	-0.225029
YNR057C	BIO4	D	-2.42038	0.559149	0.844347	0.441333	-0.432995	3.59883
YNR056C	BIO5	D	-1.16978	0.775147	1.0893	-0.64451	0.714394	0.44686
YNR056C	BIO5	D	-1.48711	0.642957	0.246526	-1.84816	0.317637	-0.154088
YNR056C	BIO5	U	-0.417542	0.202753	-0.0295203	-0.144031	-1.15097	0.0125316
YBR270C	BIT2	D	0.152146	0.646522	-0.03619	0.258975	-0.0658167	-0.689681
YBR270C	BIT2	U	-1.10843	0.436471	1.22833	-0.761345	0.413292	-0.142472
YJL058C	BIT61	D	-0.775071	0.463074	-0.798206	0.0361668	-0.93415	-0.651644
YJL058C	BIT61	U	-0.571645	0.384746	0.402473	-0.351412	-0.192045	0.0517318
YER177W	BMH1	U	-1.75796	-0.0342386	-1.15977	1.30893	-0.0182272	1.16783
YDR099W	BMH2	D	-0.0234985	-0.152206	0.586649	-0.955985	0.377197	0.269123
YDR099W	BMH2	U	-0.723995	0.293108	-0.981377	0.36574	1.13397	-0.632122
YJR025C	BNA1	D	-0.484148	0.477583	0.761621	1.60639	1.78983	1.19275
YJR025C	BNA1	U	0.0702748	-0.491748	1.28108	1.42292	-0.77564	-0.679983
YJR078W	BNA2	D	1.17182	0.704863	1.97421	1.57197	0.272039	0.947122
YJR078W	BNA2	U	0.0813625	1.76286	-0.256496	-0.247676	-0.95057	0.780743
YJL060W	BNA3	D	0.665856	-1.27605	0.681699	1.07121	-0.0384721	0.910289
YJL060W	BNA3	U	-0.21026	0.852281	0.0498842	-0.0769533	0.319099	-0.185824
YBL098W	BNA4	D	-0.216043	0.689688	-0.491959	-0.830862	-0.0479241	0.00087461
YBL098W	BNA4	D	-0.317975	0.903282	-0.400511	-0.733527	-0.391584	-0.247084
YBL098W	BNA4	U	-0.84749	-0.484631	-0.0595009	-1.0379	0.735558	-0.0744327
YLR231C	BNA5	U	-0.791486	0.183055	1.4715	0.747368	-0.191958	-0.806814
YFR047C	BNA6	D	0.0952281	1.83992	2.06189	-1.14349	-0.867973	-1.26911
YFR047C	BNA6	U	-0.359495	-2.04332	0.867508	-1.47595	0.49762	0.738848
YNL271C	BNI1	D	-0.1522	-0.905661	0.0669244	-0.381501	0.20084	-0.213476
YNL271C	BNI1	U	0.832194	-0.205852	-0.519033	-0.0946268	0.545976	-0.25369
YNL233W	BNI4	D	1.1497	0.102629	0.114393	-0.0722645	0.13545	-0.56492
YNL233W	BNI4	U	0.051712	-0.0626657	-0.43899	0.0698025	-0.229277	0.800668
YNL166C	BNI5	D	-0.115188	-0.1208	0.55263	-0.794555	-0.412904	-1.47884
YNL166C	BNI5	U	0.25939	0.212434	1.21383	0.137868	-0.814799	-0.279892
YIL159W	BNR1	U	1.34695	0.477718	0.538044	1.71895	0.802473	2.00127
YIL159W	BNR1	D	-0.531215	-1.20048	1.26001	0.456096	-3.82575	-1.82282
YBL085W	BOI1	D	-1.21498	-0.574758	-0.376504	-0.539759	-0.701592	0.111856
YBL085W	BOI1	U	0.630054	-1.16291	-0.555604	-0.528809	1.13424	-0.0549386
YER114C	BOI2	D	0.368685	1.08823	-0.949549	-0.567299	0.577154	-0.00630873
YER114C	BOI2	U	-0.00416063	-0.0728132	0.132523	0.484104	-0.404456	-0.0897595
YLR267W	BOP2	D	0.150114	1.59304	-0.907381	2.24512	0.850061	-0.645939
YLR267W	BOP2	U	-1.64443	0.166704	0.472271	-0.504708	-0.419636	-1.36076
YNL042W	BOP3	D	-0.744784	-0.48512	0.597954	0.383209	-0.0142197	-0.612035
YNL042W	BOP3	U	-0.32902	-0.350181	-0.162479	1.42256	-1.30868	-0.0912151
YNL275W	BOR1	D	0.933821	1.38233	-0.641003	2.48224	-0.318222	0.111866
YNL275W	BOR1	U	0.454597	0.444533	1.27251	-0.0119083	-0.122691	-0.0534352
YLR078C	BOS1	D	-0.0134887	-0.509846	-0.900981	-1.15619	-0.233768	-1.21644
YLR078C	BOS1	U	0.748601	0.625465	-0.0967067	-0.653881	-0.913712	0.586672
YCR032W	BPH1	D	-0.371373	-0.363835	0.285539	0.838242	0.405389	-0.633333
YCR032W	BPH1	U	-0.760393	0.0580097	-0.203569	-0.0131089	0.29636	0.0691878
YDL141W	BPL1	D	-0.442006	-1.24783	0.576754	0.624438	-0.74042	0.0783664
YLL015W	BPT1	U	-0.9041	0.167117	0.041581	0.371091	0.914784
YLL015W	BPT1	D	0.279522	0.60251	0.161372	0.402153	1.06284	1.11402
YDL074C	BRE1	D	-2.22773	-0.807502	0.497622	-0.121607	-0.0687292	0.166274
YDL074C	BRE1	U	-0.493502	-0.15967	1.32957	0.71378	0.971079	-0.397693
YLR015W	BRE2	D	0.00779338	1.09005	1.19718	-1.33957	-0.520309	0.376424
YLR015W	BRE2	U	-0.190834	0.893605	1.4089	-0.186661	0.919351	-0.924675
YDL231C	BRE4	U	-0.512827	-0.868113	-2.21116	0.113265	0.0312314	1.65588
YDL231C	BRE4	D	-1.31118	-1.47279	0.413217	-2.75459	0.489768	-2.26004
YNR051C	BRE5	D	1.09262	0.560891	-1.3066	-1.02541	-0.417834	-0.848868
YNR051C	BRE5	U	0.584689	0.471743	-0.315784	0.218264	-0.910734	0.224421
YGR246C	BRF1	D	-0.956377	1.56013	-1.47434	-0.273453	-2.42791	-0.140303
YGR246C	BRF1	U	0.181825	0.291151	0.459569	-0.936279	1.45235	1.02559
YHR036W	BRL1	U	0.214732	0.73243	-1.06554	0.361406	-0.55868	-2.84184
YBL097W	BRN1	D	-0.773103	-0.645952	-0.141211	-1.51666	0.0653538	-0.127028
YBL097W	BRN1	U	-1.70726	-0.25894	0.899283	1.43874	1.75361	-0.765021
YPL084W	BRO1	U	0.271987	0.22064	-0.123154	-0.810957	0.663349	0.026346
YPR057W	BRR1	D	-1.31925	-0.372139	-0.205634	-0.781788	-0.732483	-0.754694
YPR057W	BRR1	U	-0.308797	-1.95171	-0.486956	0.144174	-0.393637	1.09991
YER172C	BRR2	D	2.63712	0.948961	2.13776	0.795162		-2.05334
YER172C	BRR2	U	-1.91275	-2.89633	-4.54112	2.3736	0.319511	0.084648
YGL247W	BRR6	D	1.37409	-0.598075	-1.30213	-1.18914	1.34981	-0.419344
YGL247W	BRR6	U	1.35246	-0.682985	-0.71444	0.0833882	-0.37399	-0.0978107
YOL077C	BRX1	U	-2.59499	-0.181575	2.00234	-0.165526	-1.22824	-1.16296
YDL037C	BSC1	D	-0.893884	0.438775	-0.743215	-1.45781	-0.0563951	-0.810648
YDL037C	BSC1	U	-0.300057	0.290027	1.28039	-0.380099	-0.172069	-0.925488
YDR275W	BSC2	U	-0.894353	-0.91064	0.92515	-0.0718854	-0.623964	-1.46839
YDR275W	BSC2	D	0.442164	0.814709	-1.33976	-1.91439	0.203834	-1.19217
YNL269W	BSC4	D	-0.887819	-0.510856	-0.705712	-1.30188	-0.730791	-0.378489
YNL269W	BSC4	U	-0.129578	-1.41822	-0.499844	-0.73891	-0.623496	0.203545
YNR069C	BSC5	D	0.472536	0.575856			-1.66427	-0.0875783
YNR069C	BSC5	D	0.0437796	1.49311	0.392757			0.902891
YOL137W	BSC6	D	0.126236	1.07276	-1.11457	-0.241707	0.396498	-0.0169902
YOL137W	BSC6	U	-0.760304	1.00109	-1.15425	0.00582529	-0.2372	1.03042
YBR290W	BSD2	U	-0.622853	-0.0367247	0.558707	0.418739	-0.605014	-0.665898
YPR171W	BSP1	D	0.383081	-0.371078	1.1412	-0.111034	-0.241368	-0.461481
YPR171W	BSP1	U	0.489875	0.975015	0.0548873	-0.556351	0.690526	2.06133
YFL025C	BST1	D	-1.72809	-0.440189	0.153687	-0.494598	-1.38846	0.145767
YGR142W	BTN2	U	0.550742		-0.515501	-0.22079	0.856901
YGR142W	BTN2	D	-0.990585	0.33392	0.378829	-0.0258409	0.705474	0.551924
YPL069C	BTS1	D	0.367349	1.41135	-1.13427	0.149415	-0.286455	-0.431275
YPL069C	BTS1	U	-3.32723	-3.66081	-3.28305	-2.25817	-3.29085	-3.63419
YPL069C	BTS1	U	-2.75189	-4.43844	-3.31216	-1.27734	-3.28064	-4.78637
YDR252W	BTT1	U	0.927253	0.171348	0.863943	-0.0842021	-0.342403
YDR252W	BTT1	D	-0.178618	0.572288	-0.288473	0.982915	0.460279	-0.392038
YGR188C	BUB1	D	0.630458	-1.33999	0.0157561	1.54703	-0.0249217	0.0639935
YGR188C	BUB1	U	-0.014136	0.199884	-2.32572	0.143491	1.21045	0.743946
YMR055C	BUB2	U	-0.687079	-0.315876	0.832307	0.200016	-0.51478	0.0420723
YOR026W	BUB3	D	0.130392	1.24328	0.0842832	-0.67417	0.783249	-1.04125
YGL174W	BUD13	D	-0.234605	0.149964	-0.297561	-0.0835936	-0.167033	-0.156156
YAR014C	BUD14	U	-0.0320867	-0.934809	0.654699	-0.76448	-0.249982	-0.240323
YEL029C	BUD16	D	1.13289	-0.839961	0.424788	-0.380409	0.339308	0.00540497
YEL029C	BUD16	U	0.434992	0.134582	-0.0225242	-0.084421	-0.248836	-0.376782
YNR027W	BUD17	D	0.965186	0.890487	-1.46064	-0.481962	0.360384	0.281125
YKL092C	BUD2	D	-0.175424	-1.40326	0.619025	-0.701568	-0.90256	1.34218
YLR074C	BUD20	U	0.156819	0.128771	0.232378	0.634886	-1.22465	0.599515
YOR078W	BUD21	U	-0.707408	0.325908	1.6005	1.89121	2.88166	0.206449
YCR047C	BUD23	D	0.0508914	0.302454	0.7642	0.0624865	0.758102	-0.136377
YCR047C	BUD23	U	-0.510796	-0.589824	-0.552788	-0.330877	-0.0980992	0.308627
YER014C-A	BUD25	D	-2.37267	0.582212	-0.140383	0.118366	0.874223	0.413585
YER014C-A	BUD25	U	-0.373939	-0.528263	0.110782	0.464238	-1.32337	0.361342
YDR241W	BUD26	D	0.438821	-0.0243247	0.632243	0.560974	-0.19055	-0.102726
YDR241W	BUD26	U	-0.479777	-0.336115	-0.0347182	0.798348	0.604245	-0.0642265
YFL023W	BUD27	D	0.689636	-1.22612	-0.3679	0.412799	-0.361657	-0.121982
YCL014W	BUD3	D	-1.62209	-0.19524	-0.808166	1.21954	-0.773555	-0.703904
YDL151C	BUD30	D	3.16215	-0.881802	-1.195	0.52066	-0.806385	-0.0942587
YCR063W	BUD31	U	0.31736		2.15836	0.280669		-0.975546
YCR063W	BUD31	U	-0.574189	1.91064	0.39884	0.812456	-0.117947	-0.296894
YCR063W	BUD31	D	0.398355	0.0359259	-2.07518	0.160688	-4.11117	-2.76219
YGR262C	BUD32	D	0.696981	0.624449	1.94537	-0.0597844	0.467476	0.153712
YGR262C	BUD32	U	-0.546931	-0.439703	1.57271	0.296665	-1.5322	-0.876794
YJR092W	BUD4	U	-0.428515	0.0487399	0.322131	-0.146526	-0.750035	0.20999
YLR319C	BUD6	D	0.225886	0.0677591	-0.341097	0.020339	-0.215066	0.194057
YLR319C	BUD6	U	0.0712956	0.608287	0.942197	0.569963	0.15252	-0.53185
YOR299W	BUD7	D	0.148531	0.932225	0.667031	0.692609	-0.343112	1.23996
YOR299W	BUD7	U	-0.316996	-0.375748	0.7397	1.16192	0.64104	-0.469217
YLR353W	BUD8	D	1.34102	0.837785	0.758337	1.18318	1.17011	-0.7784
YLR353W	BUD8	U	0.842523	-0.339313	-0.330487	-0.102978	-0.21259	0.269422
YGR041W	BUD9	D	0.526743	0.0979015	-0.14644	-0.319514	-0.869288	-0.0406428
YDL099W	BUG1	D	0.401457	0.684265	-0.100081	2.4447	-0.0373911	-1.29808
YDL099W	BUG1	U	-0.288244	0.169591	-0.420079	0.745119	-0.465046	-0.868443
YMR275C	BUL1	D	-0.25587	-0.41046	-0.0961553	-0.782394	-1.03841	-0.142954
YMR275C	BUL1	U	0.112105	-0.11476	-0.489981	-1.01949	-0.174973	0.29187
YMR275C	BUL1	U	0.133429	-0.560765	0.0395587	-0.95683	-0.000348926	-0.236898
YML111W	BUL2	D	-0.791606	-1.28837	0.764006	-0.256871	-0.843933	0.478912
YML111W	BUL2	U	-0.328275	0.3655	-0.9408	0.667979	0.746179	-0.921707
YLR226W	BUR2	D	0.332573	-1.4876	-1.32586	-0.614715	-0.000827766	0.992458
YLR226W	BUR2	U	-1.51724	-0.268105	0.2531	0.469519	0.111785	0.0761964
YER159C	BUR6	D	-0.0753765	0.384997	0.602737	-0.414458	-0.368885	-0.313498
YER159C	BUR6	U	1.25795	0.126161	-0.417121	-0.369355	0.665382	-0.292338
YKL005C	BYE1	D	1.87129	-0.0866951	1.1804	-0.750298	0.844058	0.351362
YKL005C	BYE1	U	0.1662	-1.15364	-0.434846	0.60886	-0.872335	-0.826327
YKL005C	BYE1	U	0.661737	-0.825474	-0.416087	0.939856	0.296124	0.315993
YHR114W	BZZ1	D	-1.15533	-0.646329	1.169	-1.08188	0.112734	-0.126818
YHR114W	BZZ1	U	0.750832	-0.210072	0.563764	0.0741388	-0.771694	1.28537
YML102W	CAC2	D	-0.714171	0.970706	1.39223	-0.951968	0.294584	0.894918
YML102W	CAC2	U	0.571885	-0.0429457	0.859905	-0.485257	1.38375	0.535363
YDR423C	CAD1	U	0.0235493	-2.34705		-4.60674	-1.04078
YNL278W	CAF120	D	-0.521476	1.16809	0.944252	-0.0717831	-0.288369	0.375861
YNL278W	CAF120	U	-0.0570795	0.928244	-0.946981	-0.160509	0.10061	-0.782501
YGR134W	CAF130	D	0.752203	-0.880638	0.79363	1.12685	-1.2757	-0.355428
YGR134W	CAF130	U	1.75251	0.0836939	-0.446097	0.0290776	0.380473	1.52813
YFL028C	CAF16	D	-0.0452076	-0.708731	0.99379	-0.163237	-1.63071	0.572679
YFL028C	CAF16	U	0.308228	-0.420892	-1.1141	0.0121985	0.142945	0.00259307
YJR122W	CAF17	D	-0.447039	0.682402	0.292568	-0.248955	-0.342951	-0.813817
YJR122W	CAF17	U	0.524216	-0.146471	-0.917037	-0.281672	-0.104085	-0.919985
YOR276W	CAF20	D	1.0308	-0.776561	0.527094	-0.269552	0.632457	-1.94544
YOR276W	CAF20	U	0.0545479	1.31365	-0.702204	0.780921	0.0921467	0.758166
YKR036C	CAF4	D	-0.16871	0.0347938	-0.560864	-0.205545	-0.134926	-0.587536
YKR036C	CAF4	U	-0.0864892	-0.505715	0.576734	0.246465	0.676664	-0.380365
YNL288W	CAF40	D	-0.539119	-0.252268	0.218504	-0.347716	0.0376519	-0.134731
YNL288W	CAF40	U	-0.174818	-0.444269	-0.397322	0.0374083	0.151887	0.157515
YER048C	CAJ1	D	0.697498	0.759604	0.195161	1.25442	2.07475	-0.344796
YER048C	CAJ1	U	-0.109253	-0.156922	-1.08271	0.288362	0.732332	0.054838
YPL048W	CAM1	D	-0.76424	0.142339	-0.391092	-0.0720799	-0.83217	-0.989261
YEL063C	CAN1	D	-0.0609223	0.682952	-1.73489	-0.908263	-0.663069	-0.568551
YEL063C	CAN1	U	-1.3594	-0.405101	-0.550734	0.571033	-0.625593	1.70924
YKL007W	CAP1	U	-0.775215	-0.423765	-0.207412	0.907014	0.891526	-0.233495
YIL034C	CAP2	D	-0.221117	0.699514	-0.566719	-0.0247636	0.252285	0.738083
YIL034C	CAP2	U	-0.390743	0.220842	0.067023	1.15683	0.785539	-0.22503
YPL111W	CAR1	D	0.110996	0.745466	0.845669	-0.206742	-0.660224	0.107935
YPL111W	CAR1	U	-0.242524	-0.369928	-0.184742	0.452495	1.87051	1.87471
YLR438W	CAR2	U	-0.872387	1.26525	1.04108	0.371072	-0.782006	-0.367235
YML042W	CAT2	D	0.285597	0.279318	-0.650413	0.0100781	-0.165937	0.521661
YML042W	CAT2	U	1.67025	0.796778	0.059822	0.7941	0.717727	0.577049
YOR125C	CAT5	D	-0.459388	-0.139861	-1.44961	0.171855	-0.200517	-1.1364
YOR125C	CAT5	U	0.732787	-0.633555	-0.974476	-0.268749	-1.85483	0.0632433
YMR280C	CAT8	D	0.976424	-0.13932	-0.525198	-0.720345	0.243836	0.533488
YGR036C	CAX4	U	0.289932	0.462244	0.0903551	0.33649	0.680281	0.077338
YPL178W	CBC2	D	0.739955	-0.682871	0.760857	1.39176	-4.85096	1.44038
YPL178W	CBC2	U	-0.374831	-0.789512	-0.723087	-0.685347	1.76614	-1.34216
YJR060W	CBF1	D	-0.515441	-0.714583	1.13679	0.412478	1.20423	-0.126603
YJR060W	CBF1	U	1.50183	-0.290358	1.38776	0.252759	-0.777389	0.793273
YGR140W	CBF2	D	-0.55064	-1.07182	0.197197	-0.172807	-0.370646	-0.43993
YGR140W	CBF2	U	-0.496949	-0.572147	0.49181	-0.250127	-0.173513	-0.136624
YLR175W	CBF5	D	0.357623	-0.0042574	-0.140086	0.155794	-0.269498	0.364208
YLR175W	CBF5	U	-0.63055	-0.276159	-1.17465	0.340999	-1.47351	-0.0917005
YNL161W	CBK1	D	-0.604741	-1.4404	0.798057	0.167568	1.22791	0.857597
YNL161W	CBK1	U	-0.0351798	-0.924316	0.299023	-1.03991	0.701609	-0.0822045
YJL209W	CBP1	D	-1.36632	-0.808972	-0.213692	-0.339236	-0.661351	-0.822292
YJL209W	CBP1	U	-1.56509	0.055085	-1.88809	0.202806	0.127204	-0.751391
YHL038C	CBP2	U	-0.633196	0.96092	0.211772	-1.10491	-0.120936	-0.207369
YHL038C	CBP2	D	-1.05921	-2.79638	-0.802964	-2.38695	-1.14835	-0.13891
YPL215W	CBP3	D	-0.784432	0.141951	0.412423	0.158573	-0.747901	-0.0465084
YPL215W	CBP3	D	-1.18978	0.770272	-0.353803	0.670665	-0.278643	0.709703
YPL215W	CBP3	U	-0.307793	0.767706	-0.593437	-0.731487	-0.0137391	-0.290978
YGR174C	CBP4	U	-1.71663	0.0657894	-0.166491	-0.111582	0.850579	0.725598
YBR120C	CBP6	D	0.562243	0.540659	-0.0777045	-0.296745	-0.548061	-1.17891
YBR120C	CBP6	U	0.396289	-0.308689	-0.189614	-0.417704	0.113511	0.247128
YIL043C	CBR1	D	0.0289873	-0.152643	-1.50804	0.435471	0.187522	0.858751
YIL043C	CBR1	U	0.592691	0.912473	0.230189	0.21874	0.915451	0.443336
YDR197W	CBS2	D	0.197726	1.19989	0.51936	0.731944	0.679643	0.464476
YDR197W	CBS2	D	0.848091	0.314484	0.575414	0.695194	0.351864	0.396365
YDR197W	CBS2	U	0.194517	-0.0757349	0.340203	0.864007	-0.0982703	0.0222394
YKL208W	CBT1	D	-0.77826	0.480122	-0.112859	0.563487	0.331891	-1.41126
YKL208W	CBT1	U	-0.268427	-0.0799809	-0.0680794	0.856869	-0.503631	0.414591
YER168C	CCA1	D	0.598612	-0.517786	-0.159254	-0.571342	-0.368903	0.732229
YER168C	CCA1	U	0.257189	0.4111	-0.683391	-0.725932	-0.413281	-0.424304
YLR220W	CCC1	U	0.29187	-0.252089	-0.370987	0.718896	-0.356801	0.495475
YDR270W	CCC2	D	-0.214184	0.455604	1.26381	0.774764	0.190723	-2.00245
YKL011C	CCE1	D	0.800158	1.20088	2.2007	-0.499581	-1.5485	1.77576
YKL011C	CCE1	U	-0.164371	0.0655074	1.12406	0.854404	3.01935	-0.214938
YPR025C	CCL1	U	0.549113	0.55929	-1.42977	0.0992832	0.914289	-0.755603
YKR066C	CCP1	U	0.867266	2.60155	0.141311	2.40164	0.942127	0.570057
YAL021C	CCR4	U	0.183983	1.85255	0.861503	0.31723	0.973296	1.65814
YMR038C	CCS1	U	0.468517	-0.236504	-0.532006	-0.352154	-0.175102	-0.842497
YIL142W	CCT2	U	0.605541	1.54284	-0.218613	2.72204	3.05616	0.119617
YJL014W	CCT3	U	0.599909		1.71996	1.52058	3.79485	0.1409
YJL014W	CCT3	D	1.10588	0.0690986	0.79124	1.1319	0.00187073	1.37403
YDL143W	CCT4	D	1.16001	-1.61576	1.24316	1.2752	-1.06885	0.0548924
YDL143W	CCT4	U	0.40163	-1.1649	2.29933	2.8233	-1.03584	1.90603
YJR064W	CCT5	U	1.12874	0.397448	0.0830017	0.689476	1.11877	0.403572
YJR064W	CCT5	D	1.20364	-1.11091	-1.75482	-1.48485	-1.24341	-1.0282
YDR188W	CCT6	D	0.100578	0.215735	0.404749	1.87402	0.866507	0.616442
YJL111W	CCT7	D	1.61063	-0.922919	1.73012	0.911648	-0.118257	0.261715
YJL111W	CCT7	U	0.90469	-0.0551301	1.2912	2.00344	-0.172032	-0.0889823
YJL008C	CCT8	U	1.4065	1.14461	1.24743	1.20114	0.965749	-0.120187
YJL008C	CCT8	D	-1.07586	-1.4759	-0.0716479	-0.954918	-0.400715	-0.161588
YLR110C	CCW12	D	0.376923	0.620773	-0.187482	0.388846	0.13283	0.490003
YLR110C	CCW12	D	0.739311	0.459998	-0.352804	0.710742	0.365325	0.819768
YLR110C	CCW12	U	-0.0755476	0.2149	-0.442135	0.479949	-0.257227	-0.0567577
YLR390W-A	CCW14	D	0.161744	0.561316	-1.03777	0.516069	-0.108852	-1.31125
YLR390W-A	CCW14	U	0.816413	-0.253057	0.274572	0.332264	-0.789933	-1.34215
YBR131W	CCZ1	D	-0.183512	-0.0420513	0.628824	-0.0954314	-0.298295	-0.199426
YLR307W	CDA1	U	0.37944	-0.0485207	0.809235	-0.19809	-0.244289	-0.118688
YLR308W	CDA2	D	0.460774	0.543472	0.398693	0.852348	-0.369402	-0.0638434
YDR182W	CDC1	D	0.105296	-0.78209	0.932551	0.15931	-0.107701	-0.37144
YDR182W	CDC1	U	0.121238	-0.235275	-0.180993	0.853625	0.0888163	0.016682
YCR002C	CDC10	D	-0.403398	-0.0995073	-0.304745	-0.366126	0.651798	0.0161604
YCR002C	CDC10	U	-0.466027	0.115726	-0.475917	-0.997269	-0.0494502	-0.205126
YJR076C	CDC11	U	1.04779	0.30252	0.440158	-0.0924504	-0.371639	0.812246
YHR107C	CDC12	D	0.854822	1.36044	0.336891	0.5615	0.497102	0.378083
YHR107C	CDC12	U	-1.21636	0.300981	-0.514653	0.18265	-0.302879	0.544459
YLR215C	CDC123	U	1.54077	3.47735	3.2308	2.57241	2.62903	2.46696
YLR215C	CDC123	D	-0.225441	1.41271	0.667254	-0.106669	0.653968	0.371815
YDL220C	CDC13	D	0.836702	1.41892	-0.0362748	-0.523924	0.100407	1.01176
YDL220C	CDC13	U	0.687856	-1.29834	-1.22835	-1.04996	0.249883	0.0539118
YFR028C	CDC14	U	-0.422352	0.0900137	0.421888	1.02467	0.653152	-0.0261699
YAR019C	CDC15	U	-0.334388	-0.305781	0.332028	0.571773	0.019677	-0.105609
YKL022C	CDC16	D	-0.226787	-0.847018	-0.845449	-0.401979	-0.891651	0.621098
YKL022C	CDC16	U	0.579054	0.942112	-1.3093	0.985651	-0.82364	0.238017
YAL038W	CDC19	U	0.67685	-1.04985	-0.213436	-0.55696	-0.406959	1.49393
YDL102W	CDC2	D	1.31299	-1.48115	0.797804	0.427018	-0.441894	-0.0347503
YDL102W	CDC2	U	1.79925	-0.268158	-0.596548	0.223179	-0.464013	-0.668098
YGL116W	CDC20	D	0.555762	-0.828737	-0.1804	-0.193704	0.236155	0.680952
YOR074C	CDC21	D	-0.207114	-0.276795	0.160251	-0.698747	-0.0452578	-0.110665
YOR074C	CDC21	U	-0.133834	-0.223608	0.0347761	0.0115827	0.540949	-0.505938
YAL041W	CDC24	U	0.691235	-0.356329	0.545153	0.617251	-1.46195	0.444731
YLR310C	CDC25	U	0.834854	-0.526656	0.58039	-1.23135	1.02566	0.260566
YFR036W	CDC26	U	0.311311	-0.434295	1.8186	0.688393	1.41147	1.42959
YFR036W	CDC26	D	0.790148	1.09253	-0.0437298	-1.4052	0.736547	-0.20703
YBL084C	CDC27	U	-0.710308	-1.08157	-1.0373	-0.905376	-0.625852	-0.465391
YBR160W	CDC28	D	0.716522	-0.390474	-0.0677216	-1.57151	-0.593262	-0.685481
YBR160W	CDC28	U	-0.0200457	0.175821	-0.163922	0.157356	-0.392443	-0.706999
YLR314C	CDC3	U	0.0783187	3.45321	0.752504	-0.251336	0.51172	0.0331629
YOR257W	CDC31	D	-1.71623	-1.00424	-0.228808	-0.552759	-0.0330844	1.06092
YOR257W	CDC31	U	-0.554604	1.05393	0.926613	1.8314	0.469666	0.200374
YOL139C	CDC33	D	0.55567	0.577772	-0.530277	-0.332351	0.00212333	-0.266329
YOL139C	CDC33	D	0.279175	0.0311651	-0.766785	-0.690673	0.255125	-0.339261
YOL139C	CDC33	U	-0.552448	0.283595	0.612199	-0.0841636	0.275299	-0.721323
YDR054C	CDC34	D	0.277019	1.90788	1.55115	0.00257752	-0.342854	0.32629
YDR054C	CDC34	U	-0.383514	-1.20471	-0.488868	-0.683156	-0.248665	-0.600974
YDL165W	CDC36	D	-0.39213	-0.0329932	1.17825	-1.1053	0.480634	1.15637
YDL165W	CDC36	U	-0.383717	-0.700589	0.391563	-0.174111	-0.0138861	-0.44669
YDR168W	CDC37	D	0.0479408	0.144621	0.516906	-0.26273	0.276253	0.227265
YDR168W	CDC37	U	-1.21765	-1.75309	0.552255	-1.72506	-2.07881	-1.77223
YCR093W	CDC39	D	-1.97311	-2.38685	1.22146	0.937159	-0.236154	0.484911
YCR093W	CDC39	U	0.505448	-0.119088	-0.194392	2.16288	0.411585	0.764934
YFL009W	CDC4	D	1.46762		-1.03679	0.0606525	0.317677	-1.32598
YFL009W	CDC4	U	0.64529	0.000405334	1.5645	0.467813	-0.585723	0.168541
YDR364C	CDC40	D	-2.4755	-0.704334	-1.48138	0.732885	-0.674751	-1.24962
YGL155W	CDC43	D	0.868696	0.791794	0.0976072	-0.114302	-0.876127	-0.0832265
YGL155W	CDC43	U	-0.336627	-0.261708	-0.62107	-0.32087	-0.483933	-0.422171
YLR103C	CDC45	U		-0.473069	1.45508		-0.911486	-0.263463
YLR103C	CDC45	D	0.260091	-0.0511824	0.00970355	0.38093	0.381766	-0.217183
YLR274W	CDC46	D	0.84227	-0.361881	0.578152	0.216344	-0.314009	-0.677307
YLR274W	CDC46	U	-0.210765	0.298507	-0.619397	-2.06078	-0.413709	-0.650002
YBR202W	CDC47	U	-2.12815	-1.27165	-0.231619	0.898273	-0.203465	-0.280731
YDL126C	CDC48	D	-0.832361	1.65113	-0.211371	-1.50547	-0.242629	-0.0622216
YMR001C	CDC5	U	-0.272746	0.887002	-0.407339	-0.515298	0.652209	-0.0128359
YCR094W	CDC50	D	-0.705638	3.31609	0.89425	0.481681		-0.506411
YCR094W	CDC50	D	-1.29457	2.25203	0.0412908	0.697111	-0.742493	-0.155466
YCR094W	CDC50	U	1.52174	-0.734022	0.118578	0.843865	-0.56316	-0.433384
YDL132W	CDC53	D	-0.135515	0.130753	-0.263661	-1.2233	-0.349671	-0.018132
YPR019W	CDC54	D	0.477225	-0.224172	-0.645755	0.0891234	-0.177946	0.825525
YPR019W	CDC54	U	-1.37977	-0.797714	0.486566	-1.33698	0.0162133	0.356538
YJL194W	CDC6	U	0.418944	0.271543	-0.140978	-0.777288	2.67189	0.00597455
YPL160W	CDC60	D	0.275867	1.1625	2.34745	1.67835	0.477268	0.821383
YPL160W	CDC60	U	-0.107401	0.356551	-1.17022	0.519471	1.06883	0.812184
YDL017W	CDC7	D	0.716609	0.314394	1.20885	-0.140589	1.28958	-0.568338
YDL017W	CDC7	U	0.374531	0.822826	0.453818	0.283971	-0.0199058	0.558534
YLR418C	CDC73	U	3.45183	0.339305	0.842076	2.07268	0.734983	1.00902
YLR418C	CDC73	D	2.49404	0.651613	-2.02404	0.740505	-1.00499	0.820592
YJR057W	CDC8	U	0.36974	0.471277	1.25632	1.05369	0.208485	2.32431
YJR057W	CDC8	D	-1.38905	-1.92446	0.505765	-0.03072	-0.876933	-1.80689
YDL164C	CDC9	D	0.653475	-0.777692	-0.844026	-0.193795	0.994432	1.0801
YDL164C	CDC9	U	-1.03093	0.250583	0.61525	-0.679017	-0.849148	-0.0163271
YGL003C	CDH1	D	-0.270672	1.2133	-0.440479	0.731228	-0.350701	0.768075
YBR029C	CDS1	D	0.809047	-1.35769	0.280183	0.195886	-0.593355	1.23285
YBR029C	CDS1	U	1.07641	-0.0040875	0.410183	-0.801036	0.0341127	-0.0327865
YMR213W	CEF1	D	-2.22621	-0.624883	0.41646	-0.263562	-0.971652	-0.175471
YMR213W	CEF1	U	0.946147	-0.0885735	-0.454972	0.347623	-0.661483	1.38196
YGL130W	CEG1	D	1.36617	-0.538937	1.27417	1.54816	-0.797434	0.360106
YER061C	CEM1	D	1.08433	0.58789	-0.851363	0.367526	2.53567	0.814089
YER061C	CEM1	U	-0.410938	-0.549076	-0.633897	0.518765	0.872133	1.13459
YPL228W	CET1	D	-0.755351	-0.3027	-1.25896	0.36483	0.384329	0.592856
YIL003W	CFD1	D	-0.0700817	-0.0415851	0.266479	0.148415	-0.0579543	-0.342132
YIL003W	CFD1	U	0.00781521	0.664636	-2.84634	-0.212742	0.332212	-0.6661
YDR301W	CFT1	D	-0.15987	0.156475	0.617493	-2.26585	-0.823236	-1.15711
YML036W	CGI121	D	-0.112116	-0.163744	0.273262	-0.818894	0.708644	-0.644541
YML036W	CGI121	U	-0.809913	0.870871	-0.831713	0.213922	0.629545	-0.690675
YGL029W	CGR1	D	-0.172228	-1.13049	-1.58666	0.262438	-0.827779	0.390551
YGL029W	CGR1	U	0.37141	-0.811286	0.506509	-0.161314	0.827639	-0.14277
YCL064C	CHA1	U	0.208292	1.59062	1.19916	1.01028	0.493969	0.292932
YCL064C	CHA1	D	0.31546	-0.520764	-0.803726	0.700364	0.535922	-0.571642
YLR098C	CHA4	D	-3.26982	-0.743218	0.794027	-1.12422	0.358736	-0.589777
YER164W	CHD1	U	-0.161627	-0.0478519	0.0843701	0.339691	0.639745	0.675423
YPL008W	CHL1	D	-0.181209	0.862194	-0.601389	0.578313	0.939371	0.415909
YDR254W	CHL4	D	-0.6794	0.035454	-0.809783	-0.305274	-0.490676	0.310221
YDR254W	CHL4	U	0.990909	-0.109541	-1.27287	-1.75706	-0.187189	0.0805885
YGR157W	CHO2	D	0.356253	-0.129829	-0.381797	0.995382	1.15811	-0.451258
YGR157W	CHO2	U	-0.369265	-1.22528	-0.478678	-0.250601	-0.971508	0.504532
YNL192W	CHS1	U	0.349154	-1.27737	-1.0988	-0.160034	-0.600907	-0.718705
YBR038W	CHS2	D	-0.133663	-1.13152	-0.404319	-2.73777	0.593763	0.666867
YBR023C	CHS3	D	0.631137	0.375828	0.0665961	-1.04972	-0.542845	1.04674
YBR023C	CHS3	U	-0.529896	0.767427	-0.876751	-0.662311	-0.249041	0.541959
YLR330W	CHS5	D	-1.00878	0.477515	-0.411524	-0.475162	-0.501498	0.376034
YJL099W	CHS6	D	-0.185893	1.17503	0.567588	-0.0265937	-0.413911	-0.251036
YJL099W	CHS6	U	-0.447807	-0.282382	0.741983	-1.44871	1.01342	-0.293945
YHR142W	CHS7	D	-0.20819	-0.917594	0.978028	-1.13462	-0.0516095	0.125372
YHR142W	CHS7	U	-0.884133	-1.75437	-1.80323	-0.985891	-0.981182	-0.886008
YER030W	CHZ1	U	0.377109	-0.624797	0.948853	0.00388665	1.94674	-1.28288
YDR267C	CIA1	D	-0.661219	0.694626	-0.050577	-0.604351	-0.676578	-1.92417
YDR267C	CIA1	U	-0.570751	-3.75993	-2.46791	-0.732667	0.247948	0.505282
YMR198W	CIK1	D	-0.906443	-0.070189	-0.245858	-0.00700254	-0.245104	-1.84571
YMR198W	CIK1	D	-0.505147	-0.658951	0.586342	-0.535352	0.32473	0.841967
YMR198W	CIK1	U	-0.113275	0.351548	0.246949	-0.260264	0.38738	-0.104034
YMR198W	CIK1	U			-1.76191	-2.20329	-2.4753	-3.66642
YOR349W	CIN1	D	0.108139	-0.88094	-0.393829	0.429599	0.657872	-0.670602
YOR349W	CIN1	U	-0.894799	0.0549761	-0.780035	0.681024	0.287774	1.43138
YPL241C	CIN2	D	0.678887	-1.26671	0.833781	0.318391	-0.215382	1.43158
YPL241C	CIN2	U	-0.114941	0.24428	-0.722642	-0.565174	1.01996	1.95035
YMR138W	CIN4	D	0.595166	-0.939313	0.430447	-0.799094	-0.564027	-1.12814
YMR138W	CIN4	U	0.2302	0.216165	0.0616104	0.0371556	-0.198074	-0.156795
YOR028C	CIN5	D	-0.230776	-0.200212	0.436438	0.827931	-1.18767	-0.210809
YOR028C	CIN5	U	0.229225	1.51897	0.246699	-0.370806	-0.650374	0.547423
YDR022C	CIS1	D	0.248293	0.945639	0.137087	2.22551	1.31085	1.75136
YDR022C	CIS1	U		0.0140491		0.350712	-0.779555	0.611553
YJL158C	CIS3	D	0.184425	0.614148	1.86383	1.4173	-0.0542213	0.558554
YJL158C	CIS3	D	0.194286	0.349016	1.10284	0.784551	0.162739	0.164701
YJL158C	CIS3	U	-0.767863	-0.293396	-2.41104	-0.277757	0.391095	1.12017
YNR001C	CIT1	U	-0.236081	0.929172	-0.133886	0.359502	2.05232	-0.559878
YCR005C	CIT2	D	0.531688	1.02467	-0.422312	0.805204	0.64638	-0.00193553
YCR005C	CIT2	U	0.6604	2.10025	-0.477284	0.711972	1.41916	0.080588
YPR001W	CIT3	D	1.17885	1.25104	0.736195	-0.22139	0.0356454	-1.17898
YPR001W	CIT3	U	0.0375494	1.0237	0.860097	-0.620605	0.0763258	0.375678
YIL035C	CKA1	U	-1.75898	0.509802		-1.69149		-0.533883
YIL035C	CKA1	D	-0.891268	0.401806	-1.09457	0.461044	1.61006	-1.17003
YOR061W	CKA2	D		2.27472		0.747356	0.824617	0.699676
YOR061W	CKA2	U		-3.28078	-1.33758	1.75496	0.502071
YGL019W	CKB1	U	-0.472339	0.898444	0.341423	-0.668913	0.454319	-0.349041
YGL019W	CKB1	D	-1.05834	0.224636	-3.12622	-0.721418	-1.2281	-0.564341
YLR133W	CKI1	U	1.11668	1.84681		1.69475	1.43121	1.21299
YLR133W	CKI1	D	0.00713537	-0.436306	0.829649	0.121787	-1.13097	-0.907363
YBR135W	CKS1	U	-0.693838	-0.778047		0.786767	0.00889646	-1.51864
YBR135W	CKS1	D	1.1587	0.78578	1.35182	0.391762	0.0853145	0.102912
YNL298W	CLA4	D	-0.201768	-0.752186	-1.41616	-1.26131	-0.439676	0.254778
YNL298W	CLA4	U	-0.40513	1.05885	-0.696853	-0.0966413	0.218708	0.561344
YGR108W	CLB1	D	1.31243	-0.651559	-0.250548	0.193621	0.631556	0.100701
YPR119W	CLB2	U	0.46693	-0.202856	0.80244	0.409924	-0.459539	-0.417706
YDL155W	CLB3	D	-0.151261	1.29256	0.447924	0.185435	0.2038	-0.819701
YDL155W	CLB3	U	0.901563	0.554679	-0.834151	0.246233	-0.0242146	-0.550528
YLR210W	CLB4	U	0.721311	0.79446	-2.17754	-0.187971	-0.761835	1.11915
YPR120C	CLB5	D	-0.568118	0.667033	-3.7371	0.960268	0.00877929	0.110883
YGR109C	CLB6	D		0.0456736	0.477751	-0.050504	0.194538	0.0268589
YGR109C	CLB6	U	-1.01893	-2.81004	0.225989	0.501589	0.62565	0.787879
YGR167W	CLC1	D	0.0490581	0.640685	-0.244621	0.0431672	0.535541	-1.13294
YGR167W	CLC1	U	-0.540616	-0.102235	0.0167395	0.260915	-2.5451	-0.981403
YGL215W	CLG1	U	-0.577696	-0.0505988	-1.13744	-0.545043	-0.639405	0.0562178
YGL215W	CLG1	D	-0.929637	-0.399666	-1.22515	-1.02596	-1.19275	0.12053
YMR199W	CLN1	D	0.17071	1.31121	0.241481	-0.880566	0.731051	0.40126
YMR199W	CLN1	U	-0.192945	0.201823	0.392507	-0.152231	1.06305	1.06352
YPL256C	CLN2	U	-0.0475263	0.441815	0.907529	0.460829	0.511837	1.07677
YAL040C	CLN3	U	0.797711	-0.273854	0.295963	1.04136	0.954042	2.0228
YMR012W	CLU1	U	-0.405875	0.351846	0.941747	-0.162504	-0.129834	-1.4653
YBR109C	CMD1	D	-0.851448	-0.512314	0.931937	0.441277	0.307917	-0.469428
YBR109C	CMD1	U	0.298814	-0.0347188	0.170103	-1.07208	-0.00246307	-0.0738408
YFR014C	CMK1	U	0.781759		0.90029	0.963172	1.58434	0.0807748
YOL016C	CMK2	D	0.395194	0.113342	-0.680012	0.411831	-0.0581867	-0.47491
YOL016C	CMK2	U	-0.115759	-0.379025	-0.098705	-0.0805063	0.793565	-0.0539254
YML057W	CMP2	U	-1.89704	-2.24452	0.478208	0.768876	-0.12767	-0.56631
YLR433C	CNA1	D	-0.435614	-0.898422	0.928515	-0.829917	0.66988	-1.53473
YKL190W	CNB1	D	-0.320756	0.105631	-0.832471	1.03613	-0.379711	-0.251681
YKL190W	CNB1	U	0.481979	-0.200829	-0.988744	-0.954944	1.04183	0.161076
YNL225C	CNM67	U		0.175817	-1.43639	0.770105	-0.264629	0.126933
YNL225C	CNM67	D	1.17811	0.26571	-0.132744	0.171372	-0.489423	-1.59179
YFR046C	CNN1	D	-0.178472	1.68587	-1.25294	1.49762	-0.413162	0.564145
YBR155W	CNS1	D	0.574789	0.5967	0.229811	0.0260085	0.448774	-0.951528
YBR155W	CNS1	U	-0.539807	-0.257137	0.225513	1.07073	1.01397	-0.187672
YLL050C	COF1	D	-0.418016	0.446968	-1.81689	-0.377704	0.0911466	0.326752
YGL223C	COG1	D	-0.152707	0.32498	-0.967897	-0.163558	0.512345	0.157495
YGL223C	COG1	U	0.757969	-0.891767	-0.343251	-0.0872904	0.0703761	0.842439
YGR120C	COG2	D	-0.55251	0.165532	0.454396	-0.460558	-0.663777	0.241265
YGR120C	COG2	U	-0.766077	0.760778	-0.357715	0.250071	0.314696	1.11421
YER157W	COG3	U		1.66937	0.704387	1.85203	1.06233	0.801124
YER157W	COG3	D	2.6876	1.56442	2.05394	-1.27398	-0.895769	-0.11977
YPR105C	COG4	U	0.844097	0.66749	0.570751	-0.378478	0.155775	-0.729119
YNL051W	COG5	D	0.771424	1.20721	0.961312	-0.146392	0.900777	2.05049
YNL041C	COG6	U	0.0188125	-0.339459	0.22326	1.02647	1.70678	1.28581
YNL041C	COG6	D	0.692867	0.367286	0.641035	0.161759	-0.186871	-0.0580104
YGL005C	COG7	U	-1.06165	2.26431	0.531995	-0.730199	-0.969149	-0.609994
YML071C	COG8	D	0.423676	-0.562607	-2.52196	0.168832	-0.209128	2.07543
YML071C	COG8	U	-0.508339	0.327599	0.00983573	0.112065	0.765516	0.00977087
YDL145C	COP1	D	0.96439	0.60559	-0.602963	-0.23351	0.788733	0.282014
YDL145C	COP1	U	-1.38319	-0.782217	-1.73178	-1.9569	0.261546	0.715779
YBR003W	COQ1	U	-0.332555	-1.09899	-0.0450629	0.85611	-0.832875	-0.754449
YOL008W	COQ10	D	-0.926222		0.315897	1.71473		-0.3498
YOL008W	COQ10	D	-0.802679	3.02156	0.876477	1.29946	0.381671	-0.173197
YOL008W	COQ10	U	-0.311234	-0.524947	-0.973733	-0.407783	-1.05349	-0.145197
YNR041C	COQ2	D	0.804807	0.896399	-2.64159	-0.450856	-0.615368	0.108494
YOL096C	COQ3	U	0.155035	1.16856	-1.33101	1.31414	-0.394816	1.06296
YOL096C	COQ3	D	1.97319	-0.740045	-0.311068	-0.123163	0.0106998	-1.81434
YML110C	COQ5	D	0.712798	-0.558432	0.0857752	-0.628256	1.03009	0.800767
YML110C	COQ5	U	0.666172	0.144157	0.117405	0.482107	-0.495542	0.320958
YLR201C	COQ9	D	0.535479	2.46474	-0.492496	0.535113	0.33225	-0.252125
YLR201C	COQ9	U	-0.00315468	-0.664364	-1.51761	0.1164	0.842417	1.65634
YBL045C	COR1	D	0.939524	-0.742132	-0.0674187	-0.535161	0.160546	-0.289631
YBL045C	COR1	U	0.418699	0.864558	0.553881	0.803884	0.556365	3.46291
YNL336W	COS1	D	0.572854	0.355775	-0.368028	1.18418	0.319995	0.88254
YNL336W	COS1	U	0.493326	0.0489452	-0.634516	-0.418055	0.64333	0.456937
YNR075W	COS10	D	-0.0481798	1.78505			0.000110785	0.425155
YNR075W	COS10	U	-0.722348	0.245815	-0.666762	-0.220182	-0.107241	-0.471768
YBR203W	COS111	D	-0.455738	-0.00504268	0.223942	0.257984	0.159274	-0.437737
YBR203W	COS111	U	0.0183405	0.631949	0.67809	-0.567466	-0.400374	-0.786891
YGL263W	COS12	D	1.0202	-0.662022	-1.45546	-0.0843565	-0.554883	-1.00265
YGL263W	COS12	U	0.731788	0.486482	1.24097	0.503669	-0.447637	-0.0367412
YGR295C	COS6	D	0.325026	0.757553	-0.359017	0.0286677	-0.435468	-0.745652
YGR295C	COS6	U	0.40871	-0.0954925	-0.272068	-0.207712	-0.543047	1.01424
YPL172C	COX10	U	1.69262	1.89293	-0.239535	1.44357	-0.664267	0.0227524
YPL172C	COX10	D	0.930476	-1.43941	0.797922	0.688726	0.345687	-0.767348
YPL132W	COX11	D	0.895243	0.591939	-0.467273	0.606075	0.245902	-0.59585
YPL132W	COX11	U	-0.737647	2.06058	-0.251292	0.898809	-0.423443	-0.650799
YLR038C	COX12	D	0.302757	-0.0404525	-0.330787	0.808153	-0.417406	0.591447
YLR038C	COX12	U	-0.423778	-0.479249	-0.104541	0.776617	-0.2172	-0.0979113
YML129C	COX14	D	0.573192	0.661093	-0.280783	-0.23424	0.551155	0.669353
YML129C	COX14	U	0.753402	0.654407	-0.12839	-1.00812	1.37111	0.0698624
YER141W	COX15	D	0.838334	0.0257795	0.916948	-0.292356	0.910048	-0.894213
YER141W	COX15	D	0.411087	-0.415045	0.532919	0.015832	-0.0224894	-1.25001
YER141W	COX15	U	0.047815	0.0301323	-0.715527	0.381214	1.39066	-0.514711
YJL003W	COX16	D	0.80961	-0.974259	-0.0253072	-0.832431	-0.0913881	-0.810226
YLL009C	COX17	U	-1.76919	0.0689276	-2.28956	0.814831	-0.191478	-0.923916
YLL018C-A	COX19	D	0.547282	-0.00710633	-0.30543	-1.05591	-1.81689	-0.0894024
YLL018C-A	COX19	U	0.146285	1.79465	-0.102355	0.230989	1.9588	0.218349
YDR231C	COX20	D	-0.920374	-0.499927	-0.246357	-0.384645	-0.0469522	-0.887208
YDR231C	COX20	U	-0.231477	-0.859016	-0.14455	-0.592763	-0.325784	-0.415635
YHR116W	COX23	D	-0.900212	1.38679	-0.747108	0.457468	0.259091	0.91912
YHR116W	COX23	U	0.0289924	-0.623221	0.400791	-0.21178	0.641427	0.276128
YNL052W	COX5A	D	0.826197	-0.959998	-2.12729	0.967247	0.360075	-1.93864
YNL052W	COX5A	U	0.621155	-0.115881	-0.234038	0.670779	-0.0288121	0.3881
YIL111W	COX5B	D	-0.711708	0.205407	-0.466587	-0.414706	0.414885	0.0404625
YIL111W	COX5B	U	-0.972002	-0.356616	-0.998561	-0.497972	-0.336589	-0.498363
YHR051W	COX6	D	-0.19292	-0.0671628	0.0744654	-0.706922	-1.57569	0.00671612
YHR051W	COX6	U	-0.204899	-0.7333	0.822936	-1.74009	-0.793237	-0.400292
YMR256C	COX7	U	0.135795			-1.69569	-0.427236	-2.72054
YMR256C	COX7	D	0.169832	-0.939517	-1.68981	-1.26589	-0.321513	-1.1143
YLR395C	COX8	U	1.13748	1.54284		0.489583		0.820133
YLR395C	COX8	D	-0.365133	1.66431	-0.855508	-1.27535	-0.864706	0.802939
YDL067C	COX9	D	-0.277262	-0.125275	0.480354	0.843057	0.00172343	-0.139479
YDL067C	COX9	U	0.113062	-1.36998	-0.793938	0.368949	0.971811	1.00246
YKL179C	COY1	D	0.618168	0.991067	0.486311	-0.433627	-1.25231	1.15958
YKL179C	COY1	U	-0.811151	-0.677588	0.221388	-1.33628	-0.878843	0.324659
YOR303W	CPA1	D	-0.920215	-0.43416	0.358027	0.198834	-0.664746	-0.722521
YOR303W	CPA1	U	-1.02052	0.449409	-0.337041	-0.560886	-1.04075	-0.506379
YOR303W	CPA1	U	1.85633	-0.131498	0.853418	-0.180032	0.681458	1.48088
YOR303W	CPA1	D	-2.02662	-0.863795	1.04877	-0.194188	-1.33021	-1.59703
YJR109C	CPA2	D	0.35273	0.47531	0.97102	-0.405788	0.578129	-0.267643
YJR109C	CPA2	U	-0.540263	0.656182	0.931611	0.793579	-0.304373	0.236801
YGR247W	CPD1	D	-0.610178	-0.334068	-0.332597	0.474147	0.0196035	0.338013
YGR247W	CPD1	U	0.791576	-2.42318	-0.671886	0.721124	0.785979	0.00060156
YHR057C	CPR2	U	-1.04888	0.249315	0.56797	0.179898	-0.875822	0.98752
YML078W	CPR3	U	0.258066	1.07293	-1.02591	0.614276	0.518111	0.0720578
YCR069W	CPR4	D	-0.301737	0.710339	0.0352714	-0.773842	-0.139841	-0.641056
YCR069W	CPR4	U	-0.767754	-0.694728	-0.245041	0.165037	0.0915022	-0.812043
YDR304C	CPR5	D	0.127638	1.27217	-0.542776	-1.00581	0.0487387	0.771273
YDR304C	CPR5	U	-0.0827168	-0.8973	-0.759514	0.328465	0.236997	-0.00937679
YLR216C	CPR6	D	0.881823	0.391398	0.654406	0.137619	0.443127	-0.742096
YLR216C	CPR6	U	-0.963556	-0.822113	0.772964	-0.0728975	0.0280699	-0.462686
YJR032W	CPR7	U	1.26817	2.55559	5.09194	2.74755	1.67388	1.73808
YJR032W	CPR7	U	0.343117	0.697039	2.02225	1.68104	1.53219	-0.149581
YJR032W	CPR7	D	-0.113914	0.0127619	0.427083	-0.371297	-0.0260539	-0.638518
YNR028W	CPR8	D	0.271794		3.55958	-0.520281	-0.243941	-0.462897
YJL172W	CPS1	D	0.930072	-0.726157	-1.24488	-0.50756	-0.86683	0.24484
YJL172W	CPS1	D	0.332471	-1.20332	-0.536931	-0.669056	-0.511507	-0.444459
YJL172W	CPS1	U	-0.368894	1.51853	-1.17693	1.80274	-0.442811	0.238899
YNL130C	CPT1	D	-0.856362	1.09213	0.187886	-0.0884423	0.861727	-1.24923
YNL130C	CPT1	U	1.00054	-0.152731	-0.0194649	0.367713	1.01527	0.806186
YOR100C	CRC1	D	-1.00611	0.732453	0.890179	0.756925	-0.428671	-0.159623
YOR100C	CRC1	U		-1.84355	-1.26287	-2.65006	-3.01509	-4.64681
YDL142C	CRD1	D	-0.190998	-0.577464	0.411205	-0.238952	-0.09815	0.43608
YDR223W	CRF1	D	-0.941791	0.945528	-0.272253	-0.814405	0.0899184	0.0822421
YDR223W	CRF1	U	-0.0185593	0.501298	0.107578	-0.663193	-0.00423853	0.673344
YGR189C	CRH1	D	-0.0409416	2.86494	1.1286	1.58756	0.317003	0.517814
YGR189C	CRH1	U	0.305714	2.78036	-1.18211	0.805217	-1.08076	0.94013
YGR218W	CRM1	D	-0.00950238	1.22421	-0.469918	-1.27278	0.596555	1.05698
YLR429W	CRN1	U	0.133886	-0.338666	0.175795	0.124224	-0.83867	-0.807545
YHR146W	CRP1	D	-0.884944	0.130088	-0.164047	0.257316	0.415018	-1.79765
YLR213C	CRR1	D	0.92772	0.778005	0.159946	0.721597	-0.265389	0.355432
YLR213C	CRR1	U	0.888919	0.248209	-1.11444	-0.762688	-0.204369	-0.814794
YOR031W	CRS5	D	0.655615	0.171683	-0.78275	-0.177955	-0.465406	-0.779678
YOR031W	CRS5	U	-1.28491	-0.527685	-0.358969	-0.401034	-1.40024	-0.227626
YOL063C	CRT10	D	-0.130251	1.35424	-1.27198	1.06195	-0.765414	-0.0172131
YOL063C	CRT10	U	-0.940904	-1.16532	0.701795	0.103893	-0.188798	-1.07327
YNL027W	CRZ1	D	0.267719	-0.800852	0.0120384	-0.646983	1.26938	-0.963254
YGL238W	CSE1	U	-0.0430446	-0.175847	0.389153	0.0431424	-0.125335	0.291847
YNR010W	CSE2	D	0.519696	0.220795	1.00472	0.437921	0.261875	1.10905
YNR010W	CSE2	U	-0.98999	-0.857794	-0.763513	0.123699	-0.555436	-0.0116988
YKL049C	CSE4	U	-0.26513	-1.9739	-0.300864	0.172723	0.118216	-0.0282153
YLR087C	CSF1	D	1.7819	1.01634	0.969784	-0.634387	1.38955	-0.908484
YLR087C	CSF1	U	-0.607331	-0.444452	-0.29861	0.175479	0.555766	0.576187
YBR036C	CSG2	U	-0.21497	0.757546	0.985964	-1.00418	0.0789314	0.15325
YBR161W	CSH1	U	-0.372818	-0.122274	-0.866777	-0.211704	-0.892483	-0.169868
YMR025W	CSI1	U	-0.608571	0.33282	0.374557	-0.689828	0.0284	-0.894078
YCR086W	CSM1	U	2.12005	-0.638369	0.0159553	-0.905683	-0.857951	-1.30527
YIL132C	CSM2	D	-0.509589	0.359535	-0.631892	-0.211061	0.684822	-0.707483
YIL132C	CSM2	U	-0.518337	-1.24721	1.13094	2.15283	-0.146781	0.437846
YMR048W	CSM3	D	0.124532	-0.0566211	0.475385	0.246528	0.776003	1.61594
YMR048W	CSM3	U	0.270343	-0.0708365	-0.23664	-0.428614	0.74967	0.597874
YPL200W	CSM4	U	-0.0186103	-0.447739	-0.395334	-0.737653	0.799762	1.05191
YJR084W	CSN12	D	-1.74824	0.177318	-0.984163	0.066854	-0.126697	0.105117
YJR084W	CSN12	U	-0.274631	-0.0884837	0.881094	0.472226	0.686674	-0.215613
YJR084W	CSN12	U	0.369415	0.584373	0.664054	0.892035	0.424408	0.610108
YDR179C	CSN9	D	-0.119835	0.0131366	-0.16382	-0.110812	0.149207	-0.750702
YDR179C	CSN9	U	-1.18587	-1.49441	-0.751584	-0.433817	-1.10084	-2.01036
YLR380W	CSR1	D	0.0212595	-1.65064	2.65227	-0.46243	1.40536	1.0535
YLR380W	CSR1	U	0.0742393	0.106865	-0.269392	0.0177914	0.113844	-0.387092
YPR030W	CSR2	D	0.77254	0.385555	0.275145	-0.45686	1.08377	0.12798
YPR030W	CSR2	U	-0.580095	0.180199	-0.459887	-0.235505	-0.152151	0.590694
YIL036W	CST6	D	-0.310408	-0.780118	-0.0643793	-0.813909	-0.0520869	-0.570269
YIL036W	CST6	U	1.26296	-0.386264	0.260878	-0.525157	-0.377201	0.807979
YLR394W	CST9	D	0.548493	0.293507	0.158093	0.825952	1.22631	0.955364
YLR394W	CST9	U	-0.436932	-0.357714	0.322846	0.303851	-0.239264	0.753856
YDR256C	CTA1	D	-0.480209	-0.168121	2.17862	-0.0170377	0.0304676	2.6329
YDR256C	CTA1	U	-1.15395	1.65695	0.547593	-0.541843	0.311486	1.96644
YMR094W	CTF13	D	0.222925	-0.169652	-0.620536	0.295294	-0.403774	0.913692
YMR094W	CTF13	U	-1.12338	-1.3127	0.276863	-0.129032	0.949837	0.0676882
YMR078C	CTF18	D	1.69035	2.00979	1.02185	0.615309	-0.780969	-0.573974
YMR078C	CTF18	U	-1.73794	0.228977	-2.68019	-1.85606	0.273487	-4.47633
YPL018W	CTF19	D	0.618913	0.848568	-0.292616	-0.422151	-0.300695	0.141047
YPL018W	CTF19	U	-0.33644	-0.292479	-0.941959	0.0105674	-0.559864	-1.1047
YLR381W	CTF3	D	-0.76324	-1.64329	-0.462327	-0.128238	1.60041	-0.116545
YLR381W	CTF3	U	0.234693	-0.132055	0.147785	-0.737306	-0.329484	0.136009
YPR135W	CTF4	D	-0.889996	0.455433	-0.936639	-1.27593	1.52664	1.9259
YPR135W	CTF4	U	0.807234	-0.161705	-0.52905	0.881592	0.0342128	0.353793
YHR191C	CTF8	D	-0.237158	-0.00737991	0.127993	-0.370259	-0.490039	-0.0859136
YHR191C	CTF8	U	0.220544	-0.758406	0.0402465	0.841254	0.455346	-0.0201073
YKL139W	CTK1	D	-0.41561	0.0219252	0.541865	-0.733553	0.899715	-0.310423
YKL139W	CTK1	U	-2.1494	0.324414	-0.0130096	-0.408317	-1.57579	1.8375
YKL139W	CTK1	U	-0.510153	-1.28706	-0.102685	0.618133	-0.00643835	0.793723
YJL006C	CTK2	U	-0.00220605	1.34498	1.28568	1.08304	1.55823	1.34652
YJL006C	CTK2	D	0.583377	1.73909	0.684363	-0.256185	-0.142787	-0.612849
YML112W	CTK3	D	0.073148	-0.863352	1.17565	0.356144	0.520814	0.176717
YML112W	CTK3	U	-0.23074	-0.00293541	0.40224	0.155472	-0.379768	-0.0914372
YMR180C	CTL1	D	1.52968	0.144222	1.84802	0.101909	0.168574	1.11969
YHR109W	CTM1	D	-0.858712	-0.780582	0.292833	-0.404245	0.229049	-1.08398
YHR109W	CTM1	U	-0.813218	0.463378	0.688806	-0.300326	-0.556621	0.356218
YBR291C	CTP1	D	-2.00718	2.11518	-0.599965	0.855637	0.991048	0.553743
YBR291C	CTP1	U	0.187571	1.58046	-2.29765	0.17881	-0.17331	1.18204
YPR124W	CTR1	D	0.913585	0.979427	0.0102739	-1.13785	-1.10298	1.80303
YPR124W	CTR1	U	-0.269439	-1.3423	-0.0435983	-0.586654	1.54083	0.923927
YCR054C	CTR86	D	-1.13013	0.447898	0.0947457	-0.338696	-0.0495089	-0.414516
YCR054C	CTR86	U	0.8062	0.549758	0.920931	0.675364	-0.0205349	-0.06658
YLR286C	CTS1	D	1.04623	-0.44631	2.24841	-1.35971	-2.63395	0.198174
YLR286C	CTS1	U	0.257257	-0.431111	-1.38154	2.63539	2.25548	0.115577
YDR371W	CTS2	D	0.614882	-0.120765	0.451519	-0.215719	-0.806404	-1.41471
YDR371W	CTS2	U	0.236119	-0.975359	-0.0428695	0.559004	-0.386063	0.0111624
YGR088W	CTT1	D	0.696851	0.909587	-0.308775	0.321035	0.829693	1.43878
YGR088W	CTT1	U	-0.444068	0.140383	-0.295789	0.388683	-0.998675	0.869669
YMR264W	CUE1	D	-0.385417	0.851704	0.968219	-0.0633604	0.0979902	0.221118
YMR264W	CUE1	U	0.324245	0.869118	-0.607346	-0.105576	0.25524	0.315027
YKL090W	CUE2	D	1.01762	-0.519135	-0.187817	-1.25763	-0.0693102	0.0704175
YKL090W	CUE2	U	1.87585	0.514883	-0.0779053	-0.401504	1.96071	-0.495911
YGL110C	CUE3	D	-1.99606	-4.7853	0.353929	-0.321062	-1.14451	1.34628
YML101C	CUE4	D	-0.219167	-1.77676	-0.322856	-2.13188	-0.678381	0.126991
YML101C	CUE4	U	0.439716	0.239814	-0.156386	0.360903	-0.214972	0.0973517
YOR042W	CUE5	D	-1.259	-0.927804	-0.212824	0.666148	-0.327399	-0.428998
YOR042W	CUE5	U	0.0389247	1.09165	1.25715	-0.0493125	-0.536182	-0.293093
YGR003W	CUL3	D	-0.697183	0.81009	0.201368	-1.07888	0.510744	-1.92555
YGR003W	CUL3	U	0.18161	0.279352	0.6351	-1.17362	0.276279	-0.971815
YGL166W	CUP2	D	-1.01963	0.0516643	0.340537	0.0538726	0.0029372	-0.268187
YGL166W	CUP2	U	-0.889087	0.882816	0.249975	-1.04571	-0.860173	0.616964
YEL027W	CUP5	D	-1.22089	-0.445558	1.06353	-1.05568	0.569205	2.17583
YEL027W	CUP5	U	0.392015	-0.232878	0.203098	0.412378	0.368132	-0.395952
YPL177C	CUP9	U	0.674841	-0.610638	1.1033	0.297674	-0.106874	-1.77873
YMR240C	CUS1	D	1.47401	1.63648		0.130479	0.53153	1.15941
YMR240C	CUS1	U	0.524157	-0.317149	0.203973	-0.12352	0.57491	1.95584
YNL286W	CUS2	D	0.711526	-0.114794	0.681308	-0.421181	0.0434466	0.000567274
YNL286W	CUS2	U	0.585662	-0.858904	0.204916	0.0666757	-0.588381	-0.546855
YDR163W	CWC15	D	0.517985	-1.98547	-0.533115	-0.962081	-0.122984	0.0394512
YDL209C	CWC2	U	-0.451826		0.487721	0.567966	-0.220679	0.925752
YDL209C	CWC2	D	2.58002	1.8483	-0.18484	0.628484	-0.169135	-0.0856424
YDR482C	CWC21	D	0.586869	-0.998957	1.03596	0.162685	0.309432	-0.302033
YDR482C	CWC21	U	-0.49688	0.323342	-0.199369	-1.27016	0.279295	-1.1096
YGR278W	CWC22	D	1.64167	1.17746	0.196777	0.380722	0.0903806	1.62401
YGL128C	CWC23	D	0.227825	-1.44453	0.135141	-0.456122	-1.46837	-1.44216
YLR323C	CWC24	D	0.718598	0.0582552	0.45585	-0.399057	-0.373855	0.647213
YLR323C	CWC24	U	0.885124	-0.465153	0.538411	-0.790682	0.567631	0.446517
YPL064C	CWC27	D	-2.00002	1.07	-1.45309	0.615443	0.332233	0.0101581
YGL027C	CWH41	D	-2.46061	-0.54151	-0.595404	0.961523	-1.39764	-0.0476016
YCR017C	CWH43	D	0.212767	-0.104355	-0.603843	0.257436	0.142315	-0.145196
YCR017C	CWH43	U	0.651895	0.104813	0.0409083	-0.289248	1.52459	-0.333222
YKL096W	CWP1	U	0.296618	-1.41034	0.000355163	-0.661703	0.35445	-1.21328
YKL096W-A	CWP2	D	1.093	1.20138	-1.49955	0.250563	-0.305906	0.0118041
YKL096W-A	CWP2	U	-1.64739	-0.0762205	0.393493	0.120932	-0.127904	-0.779757
YJR048W	CYC1	D	-0.143038	-0.386768	-1.57708	0.28759	-0.215699	-0.288171
YJR048W	CYC1	U	0.811715	0.303356	-0.884901	0.607816	1.00971	0.357566
YOR037W	CYC2	D	-0.79352	0.40493	-0.227332	-0.270908	0.653267	-0.437891
YOR037W	CYC2	D	-0.124246	0.650481	-0.405466	-0.378551	0.46449	-0.439213
YOR037W	CYC2	U	-0.0886703	1.43847	1.19538	0.00785651	0.114266	0.33576
YAL039C	CYC3	U	-0.284155	0.0775076	0.792674	0.688696	0.447244	0.397313
YEL039C	CYC7	D	-0.0731163	0.328211	0.57397	0.656726	0.757767	0.970622
YBR112C	CYC8	D	-0.0497597	0.226366	-0.706284	-1.08045	-0.884254	-0.905593
YBR112C	CYC8	U	-0.930575	1.10007	0.0322488	-0.376216	0.318264	-0.345895
YBR112C	CYC8	U	-1.23727	1.27198	-0.214865	-0.57353	-0.464803	-0.902374
YDL117W	CYK3	D	1.0452	0.5408	1.99224	0.786721	0.0475876	1.23283
YDL117W	CYK3	U	-0.592267	0.12972	-0.528421	2.0326	0.135986	-0.373789
YDR430C	CYM1	U	-0.652314	0.229604	1.23094	-0.0270547	0.813707
YDR430C	CYM1	D	-0.71661	1.21936	-0.973836	-0.762595	0.153899	-0.11553
YJL005W	CYR1	D	0.229434	0.0484923	-0.222814	-0.446876	-0.920291	-0.991395
YJL005W	CYR1	U	0.780478	0.893065	0.0920308	0.697124	1.14769	0.285667
YAL012W	CYS3	D	-0.29458	0.0178346	0.0792466	-0.818331	0.51999	-0.492745
YAL012W	CYS3	U	1.1751	0.660708	0.771216	0.441313	0.635954	0.618347
YGR155W	CYS4	D	-0.0926085	-1.32442	0.701459	-0.552577	-0.128366	0.621182
YGR155W	CYS4	D	1.34804	0.934736	-0.378088	-0.808153	-1.98897	-0.535141
YGR155W	CYS4	U	-0.0954356	-1.53272	0.233424	-0.339934	-0.515979	-0.438298
YGR155W	CYS4	U	0.692935	-0.115393	0.0517418	0.239008	-1.01436	0.040258
YOR065W	CYT1	D	0.959604	-0.404338	0.165226	-0.314705	0.602701	-0.935969
YOR065W	CYT1	U	0.893485	0.960862	-1.6964	-0.732605	-1.3103	0.225262
YKL087C	CYT2	U		1.61538	3.28485	0.233177	0.458059	-1.77096
YKL087C	CYT2	D	-1.35571	-1.36989	-0.506243	-0.412083	0.655336	1.06456
YDR016C	DAD1	U	0.116794	0.328991	-0.827785	-0.50265	-0.0730296	-0.807669
YKR083C	DAD2	D	0.974705	0.545547	1.24618	3.18268	-1.27389	-1.09159
YKR083C	DAD2	U	-0.286366	-1.64813	-0.481376	0.649747	-1.26371	1.9016
YML070W	DAK1	U	0.508774	0.538847	0.352552	-0.517275	-0.0899602	0.608888
YFL053W	DAK2	D	0.0238645	-0.21805	-0.242428	-1.38214	-0.630945	0.286022
YFL053W	DAK2	U	0.134618	-0.777776	0.983528	-0.369219	-0.390929	0.700476
YIR027C	DAL1	D	-0.0438569	-0.9203	-0.735456	-0.269881	-0.377768	-0.782319
YIR027C	DAL1	U	-0.434098	0.484416	-0.557905	-0.259739	0.0316552	-0.743728
YIR029W	DAL2	U	-0.824162	-0.686751	-0.161759	0.039812	-0.19082	-0.481768
YIR032C	DAL3	D	0.399136	-0.298234	0.393341	-0.687681	0.119079	-0.63041
YIR032C	DAL3	U	0.182433	0.753024	-0.187783	0.622307	0.360365	-0.292514
YIR028W	DAL4	U	-0.560546	0.589404	-1.19629	-0.166919	2.37198	1.23014
YJR152W	DAL5	D	-0.752727	-0.142183	0.431233	-0.151154	0.775472	-0.100798
YIR031C	DAL7	U	-0.0909541	-0.731384	0.539677	-0.0172287	-0.423564	-0.36197
YKR034W	DAL80	D	-0.268903	0.327991	-0.0277791	0.147122	-0.0402304	-0.189649
YIR023W	DAL81	D	0.294421	0.0903959	0.190918	0.105656	-0.14053	0.0657772
YIR023W	DAL81	U	-0.851345	0.182428	0.328525	0.298515	-0.39543	-0.0199768
YNL314W	DAL82	D	0.316969	-0.413474	-0.0562689	1.39996	0.0199082	-0.245166
YNL314W	DAL82	U	-0.368116	0.664647	0.17557	0.70762	0.291635	0.612604
YGR113W	DAM1	D	-0.879883	1.44017		0.514249		-0.563164
YGR113W	DAM1	U	1.53468	-0.236951	1.07276	-0.702004	0.598746	-0.277956
YJR150C	DAN1	D	-1.00896	0.855262	1.17753	1.46111	0.628255	0.842319
YJR150C	DAN1	U	0.966601	0.208668	-0.40579	0.185035	-0.0756755	0.897558
YLR037C	DAN2	D	-0.0826149	-0.206193	1.53955	-0.171252	0.1722	1.19224
YLR037C	DAN2	U	-0.728364	-0.129207	0.304522	0.35034	0.496817	-0.605226
YBR301W	DAN3	D	-1.17178	-0.497811	-0.168341	-0.0625661	0.0441337	0.306357
YBR301W	DAN3	U	0.318179	-0.225862	-0.320257	-1.39664	-0.232408	1.03097
YPL170W	DAP1	U	-0.381152	0.330205	-1.71106	0.463667	-0.596003	-0.540879
YPL170W	DAP1	D	-1.07193	-1.90986	-2.83089	-2.04176	-0.45291	-0.312186
YHR028C	DAP2	U	-0.0045187	0.662604		1.75179	-0.7078	1.27234
YHR028C	DAP2	D	0.816603	-0.501238	-0.214813	-1.50336	-0.81215	0.475173
YHR028C	DAP2	U	-0.323132	0.0441547	1.05934	2.39123	-0.695971	0.717322
YML113W	DAT1	D	-0.342902	-0.108583	-0.324485	0.665287	-0.253975	0.505145
YML113W	DAT1	U	0.940657	-0.716152	-0.234296	-0.111085	-0.587397	0.286709
YGR092W	DBF2	D	0.648004	-0.649233	-0.479947	-1.4092	-0.418311	-0.613143
YGR092W	DBF2	U	1.24663	-0.223935	-0.501846	-0.452331	-0.427025	0.0628981
YPR111W	DBF20	D	-0.475834	0.272174	0.418142	-1.04993	-0.546575	1.63348
YDR052C	DBF4	D		-0.262289		1.55772	1.68606	1.86236
YPL119C	DBP1	U	-0.411337	0.401611		0.722309	0.280007	0.821956
YPL119C	DBP1	D	0.00357245	-1.68037	-0.971287	0.840693	-1.96693	-0.312414
YPL119C	DBP1	U	-0.403904	0.272048	0.0766997	0.376512	-0.477108	0.994515
YGL078C	DBP3	D	-0.872382	-1.14482	-3.32061	-0.240839	0.755273	-0.250545
YGL078C	DBP3	U	-0.405913	-0.385826	1.65929	-0.295688	-0.547419	0.734411
YOR046C	DBP5	U	-0.29479	-0.0161191	-0.227939	0.210083	0.14132	0.068082
YKR024C	DBP7	D	0.274503	-0.392135	0.189401	0.41237	-0.100414	-0.901882
YKR024C	DBP7	U	-0.423981	0.202812	-0.599933	0.314834	0.625298	0.273899
YLR276C	DBP9	U	0.33634	-0.317678	1.07737	-1.39824	2.46522	1.13723
YLR276C	DBP9	D	-0.640699	-0.571081	0.989825	-0.642055	1.83588	0.741721
YKL149C	DBR1	D	-0.0936975	-0.563046	1.12773	1.40539	-1.06868	1.55255
YKL149C	DBR1	U	1.4518	0.172108	-0.727815	0.638136	2.03957	-0.42282
YCL016C	DCC1	D	1.84793	0.122272	1.15559	0.274665	1.41048	-0.685025
YCL016C	DCC1	U	0.160123	-1.05527	-0.126921	-0.489612	0.00397927	-0.786479
YIR030C	DCG1	D	-0.764056	-0.363808	0.0383517	-0.0406646	-0.0993666	-0.31122
YIR030C	DCG1	U	-0.135318	0.033131	0.428193	0.220846	0.21886	-0.11147
YOR180C	DCI1	D	-0.549739	0.362796	-0.0896778	0.199647	0.259059	0.416906
YLR128W	DCN1	D	0.594319	4.02807	-0.874114	1.48568	1.44761	4.16299
YLR128W	DCN1	U	2.17033	10.0604	3.37493	2.62612	1.36661	2.32713
YOL149W	DCP1	D	0.0181473	-0.314022	-0.358848	-0.570999	-1.14245	-0.0997832
YOL149W	DCP1	U	-1.29609	-0.439968	0.764804	0.0239866	-0.487448	1.20043
YNL118C	DCP2	D	0.132097	-2.24451	-0.166989	-0.58645	-0.701613	0.275495
YNL118C	DCP2	D	0.478087	-1.37903	-0.104727	-0.918184	-0.636693	0.202763
YNL118C	DCP2	U	-0.728538	-1.35273	-0.0749234	-1.70607	1.83525	0.156203
YLR361C	DCR2	D	1.22048	-0.350511	0.218063	-0.262627	0.352952	0.348511
YLR361C	DCR2	U	-0.709209	0.673739	-0.83121	-0.927291	-0.946307	0.977688
YLR270W	DCS1	U	0.0938938	0.639353	-0.953931	-1.25705	-0.894977	-1.2233
YOR173W	DCS2	U	0.898387	0.0728388	0.32036	1.1446	1.02749	1.47025
YOR173W	DCS2	D	0.759067	0.464981	-0.354011	0.580363	2.17027	0.0852644
YKL046C	DCW1	D	-0.275742	0.461592	0.680977	0.369763	0.381887	-0.382343
YKL046C	DCW1	U	0.862266	-0.19411	-1.12628	0.318231	-0.246677	-0.273793
YPL194W	DDC1	D	-0.476881	-2.61825	1.05431	-0.0397767	-1.01583	0.107504
YPL194W	DDC1	D	-0.250333	-2.31728	2.28	0.6204	-0.824909	1.15296
YPL194W	DDC1	U	-0.0446851	0.362897	1.50267	0.578128	-0.08718	-1.32172
YER143W	DDI1	U	-0.112733	0.846677	1.06577	1.05114	0.495322	1.02049
YER143W	DDI1	D	-0.361421	-0.989663	0.508428	-0.0863715	-0.822688	-0.494872
YNL335W	DDI3	D	-0.392076	0.81442	-0.0564363	-0.191083	-0.551314	-0.199837
YNL335W	DDI3	U	-0.24946	0.782276	0.0925932	0.285769	0.738608	-0.364385
YOR163W	DDP1	D	-1.33893	-0.0175518	0.961596	0.0104799	1.89829	-1.1143
YMR173W	DDR48	D	-0.312336	-0.0965836	-0.473778	-1.03153	-0.619548	-0.376333
YMR173W	DDR48	D	1.28892	0.212475	-0.331854	-0.316269	0.722527	0.618236
YMR173W	DDR48	U	-0.256995	0.130488	-0.436326	0.0901923	-0.0314826	-0.0529513
YMR173W	DDR48	U	0.320492	0.800178	0.168014	-0.218492	0.25172	0.207885
YMR173W	DDR48	U	0.405669	0.574238	-0.445065	-0.264862	0.344127	-0.216391
YOR204W	DED1	D	2.19449	-0.802709	0.681712	-0.377092		-1.0328
YHR019C	DED81	U	0.404815	-1.29799	-0.578891	-0.871335	-0.0777744	1.1336
YKL054C	DEF1	D	0.969558	-1.05163	-0.208871	-0.112924	0.0363593	-1.06559
YKL054C	DEF1	U	1.08956	-0.460379	-1.13626	0.879957	0.900541	-0.44383
YBR163W	DEM1	U	-0.220778	-0.201322	1.40656	-0.324528	-0.246461	-1.00611
YAL013W	DEP1	U	1.69244	0.303672		0.905722	1.10664	0.61463
YAL013W	DEP1	U	0.407539	1.06135	0.106436	-0.141877	-0.00817644	0.966772
YBR201W	DER1	D	0.146142	0.206108	0.288216	1.23046	-1.58711	0.0149597
YIL049W	DFG10	D	0.412366	0.00966304	0.180801	-1.09027	-0.616955	-2.38909
YIL049W	DFG10	U	-0.339394	-1.43755	-0.47853	0.324065	-0.730442	-1.12435
YOR030W	DFG16	D	0.126085	-0.711413	-0.301565	-0.762494	-0.715404	-1.9319
YOR030W	DFG16	U	0.513266	-1.23239	0.491523	-0.727495	-0.317504	1.2546
YMR238W	DFG5	D	-0.27787	0.997516	0.612162	0.535451	-0.135573	0.606272
YMR238W	DFG5	U	1.58204	-0.784101	-1.56492	0.271295	-0.338827	-0.238223
YDR411C	DFM1	D	0.745615	-1.22153	-0.629939	1.4366	1.48752	-2.65579
YDR411C	DFM1	U	1.51553	-1.50885	0.26054	0.234475	0.505959	-1.48959
YOR236W	DFR1	D	-1.73534	-0.320935	0.727516	0.0949079	0.187452	-0.368313
YOR236W	DFR1	U	-0.0975533	0.0547036	-0.1696	-0.452246	-0.00114002	-0.95052
YOR245C	DGA1	D	0.0263848	0.517642	1.23526	-0.402742	0.915784	0.593987
YOR245C	DGA1	U	0.618577	0.288188	1.14341	-0.281018	-0.517632	1.00254
YDL160C	DHH1	D	-0.803476	0.874222	-0.556981	-0.51525	-2.24427	0.345109
YDL160C	DHH1	U	-0.951327	0.20607	0.00602548	0.325048	-0.0247797	0.245938
YKL078W	DHR2	D	1.01446	0.522366	0.42615			0.254847
YKL078W	DHR2	U	-1.68528	0.445916	0.0676046	1.12513	0.662669	-1.28481
YMR316W	DIA1	D	-1.00497	0.89032	0.960207	-0.795044	0.666163	0.899844
YMR316W	DIA1	U	1.92748	0.912479	-0.130043	-0.813681	1.51908	-0.141862
YOR080W	DIA2	D	-0.468037	-2.03454	-0.680183	-0.393831	-0.208197	0.562009
YOR080W	DIA2	U	-0.84702	-0.488627	-0.428896	0.433322	0.528602	1.31746
YDL024C	DIA3	U	0.349079	0.708332	-0.3558	-1.2618	-0.626959	0.74163
YHR011W	DIA4	D	-0.025128	-0.0297213	0.267392	-1.00654	-0.212424	-0.681635
YHR011W	DIA4	U	0.516214	1.53396	-1.80745	-1.18086	-0.123446	-1.83278
YPR082C	DIB1	D	-0.0876086	0.565771	-0.346657	0.410837	-0.202248	-0.0137723
YPR082C	DIB1	U	-0.642043	-0.540657	-1.22101	-0.510769	-0.337742	-0.0532497
YLR348C	DIC1	D	-0.0119059	0.489859	0.782537	2.24621	0.438222	0.317979
YLR348C	DIC1	U	-0.448178	0.0672485	-0.609492	-1.22503	0.451882	0.143214
YKR035W-A	DID2	U	-0.768625	-0.191378	0.655717	0.653496	0.819947	0.303581
YKL002W	DID4	D	-0.712676	-0.543323	0.00156638	-0.325547	0.0629693	2.42297
YKL002W	DID4	U	-0.173105	-0.221401	-0.215083	0.224661	-0.261338	-0.703587
YGR227W	DIE2	U	-1.4717	1.73586		-0.317634	-0.133643	0.632774
YGR227W	DIE2	D	2.30527	-1.52723	-0.141255	0.174754	-0.279012	0.417183
YPL049C	DIG1	U	0.261968	-0.878322	0.845308	-0.58558	0.755282	-0.405531
YDR480W	DIG2	D	0.84296	-0.328754	-0.513679	-0.744591	-0.105465	0.717839
YDR480W	DIG2	U	0.373819	0.433681	0.202387	-1.45265	-0.340677	0.544176
YPL266W	DIM1	D	-1.17385	-0.279703	-0.656206	-0.328801	0.728666	0.531323
YPL266W	DIM1	U	0.403375	0.51047	-0.144805	0.646904	0.721576	1.02542
YDR263C	DIN7	D	-1.3077	-0.323244	0.0146936	-0.301633	-0.0208853	-0.653877
YLR129W	DIP2	U	-0.272777	0.98171	-0.641834	-0.731168	-0.320588	0.576986
YPL265W	DIP5	D	-1.7795	-0.0841405	3.71311		4.77646	2.22608
YPL265W	DIP5	U	-1.10676	-1.27376	-2.48185	0.00243375	1.25817	-2.00889
YOL021C	DIS3	D	2.38701	1.4276	0.740407	-0.617171	1.32063	-1.32944
YDR403W	DIT1	D	1.05826	0.517996		-1.8435		0.570545
YDR403W	DIT1	U	-0.212787	-2.04138	0.00649332	-0.530872	-1.59032	-0.186997
YDR402C	DIT2	U		-1.75261	-2.64024	-2.61869	-1.80404	-1.27826
YIR004W	DJP1	D	0.0732231	-1.60974	-0.960357	-0.081286	0.622211	0.135159
YIR004W	DJP1	U	-0.596669	-0.471549	0.662717	-0.161376	-0.109786	0.101174
YDL174C	DLD1	D	1.20433	-1.04111	-0.241961	2.03612	-0.554549	0.464209
YDL178W	DLD2	U		-0.44533	-0.533313	-0.945859	-1.17654	-1.28766
YEL071W	DLD3	D	-0.736996	-0.793406	2.74245	-0.327343	0.285216	-0.455168
YEL071W	DLD3	U	-0.670542	-1.76644	-0.415582	0.43504	0.125466	1.67331
YJL065C	DLS1	D	-0.502885	-0.241535	0.493578	-0.37055	0.389379	0.319832
YJL065C	DLS1	U	-1.37003	0.562481	0.0895687	-1.30097	-0.793767	-0.314314
YHR115C	DMA1	U	0.434267	-0.197291	0.159009	0.327485	-0.491404	-0.581468
YNL116W	DMA2	D	0.808583	-0.135473	-1.57621	0.482003	0.206813	0.786119
YNL116W	DMA2	U	-0.626489	-0.626411	-0.633444	-0.0203709	-0.480214	-1.09679
YER179W	DMC1	D	1.13902	-0.551408	-1.56718	0.107153	0.366857	-0.402946
YER179W	DMC1	U	0.299455	-0.0927258	0.158058	-0.147225	0.496303	0.0362309
YMR211W	DML1	D	0.530911	0.406765	-0.719983	0.500314	0.726539	-0.288461
YMR211W	DML1	U	-1.03657	0.77281	-0.437779	0.172142	-0.767836	0.265012
YHR164C	DNA2	U	0.0991169	-0.884781	-1.24479	-0.384363	-0.637195	0.834606
YER166W	DNF1	D	-0.0706198	-0.302914	-0.15481	-1.3932	-0.69953	-1.75639
YER166W	DNF1	U	0.579027	-1.06438	-0.100047	-0.905325	-1.21071	-0.0849768
YDR093W	DNF2	D	1.71562	0.911057	1.81143	0.530914	0.196655	1.15488
YDR093W	DNF2	D	-0.854925	1.40834		-1.34154	0.171654	-0.655521
YDR093W	DNF2	U	0.151079	-0.322139	1.15122	0.737537	-0.432157	-0.16994
YMR162C	DNF3	D	0.994738	3.01117	-0.206818	-1.31528	0.64908	0.0459785
YMR162C	DNF3	U	1.13025	0.330309	-0.544464	-0.533499	-0.0689826	-0.384388
YOR005C	DNL4	D	0.344178		1.46437	1.17153	0.359322	-0.145571
YOR005C	DNL4	U	0.0817846	-0.402345	0.116634	-1.36163	1.36673	1.04489
YLL001W	DNM1	U	0.589257	-0.187786	0.436934	0.205564	0.951677	0.486839
YKL213C	DOA1	D	-0.276244	-0.0788101	0.588721	-0.264856	-0.259884	0.786614
YDR069C	DOA4	D	-0.829219	-0.659873	0.687531	-1.82996	0.00828034	1.04858
YDR069C	DOA4	U	-0.690971	-0.657206	0.477841	-2.1147	0.568036	-1.63257
YGL240W	DOC1	D	0.250041	-0.891707	-2.72865	-1.00894	-0.20375	0.974808
YHR044C	DOG1	D	0.796844	0.0273973	0.38408	-0.722296	-0.371255	-1.09868
YHR043C	DOG2	D	0.514593	0.183139	1.68321	0.874873	0.221163	0.12076
YHR043C	DOG2	U	-0.231312	-0.0229076	0.656518	-0.0691942	1.38633	0.427857
YNL001W	DOM34	D	-1.61656	1.12151	-1.01891	0.145579	-0.642139	-0.806372
YNL001W	DOM34	U	0.236947	1.25186	-0.671948	-0.206718	0.885538	0.577106
YDR273W	DON1	D	-1.69651	0.516159	-0.334893	0.0115241	0.979626	-1.41704
YDR273W	DON1	U	-2.05357	-2.88221	-1.92472	-0.485539	-4.03273	-2.07929
YDR141C	DOP1	D	3.82342	-0.221564	0.858877	-0.215021	1.26035	-0.855646
YDR068W	DOS2	D	0.832097	-1.86333	0.752062	0.168565	-0.226755	1.12094
YDR068W	DOS2	U	0.299888	-0.157558	-0.60765	0.351855	0.924932	1.49368
YDR440W	DOT1	D	-0.310599	-1.69174	0.278169	-0.319089	-1.23828	0.371774
YDR440W	DOT1	U	-0.726838	0.537575	0.228877	0.641284	-1.22508	-0.413466
YIL010W	DOT5	D	-0.220732	-0.103551	0.634835	-0.326091	-1.71202	0.535012
YIL010W	DOT5	U	-0.0470921	0.262014	-0.0787213	-0.119821	-0.282642	-0.157065
YER088C	DOT6	D	-0.372566	-0.257748	0.660385	-0.338391	-0.261787	0.150947
YER088C	DOT6	U	0.847648	-0.678353	-0.128621	-0.27396	0.280645	0.133826
YJL090C	DPB11	D	0.457748	1.25914	0.961134	-0.416028	0.227483	0.852803
YBR278W	DPB3	D	0.437299	3.45495	-0.792762	-1.12096	-0.496309	0.20504
YBR278W	DPB3	U	-0.161857	1.87349	1.272	0.114597	-0.649695	-0.858267
YDR121W	DPB4	D	-1.00523	-0.878489	-0.00725108	-0.0091996	-1.30472	0.470375
YDR121W	DPB4	U	0.426468	0.212753	-0.288279	0.846601	-0.521779	0.652342
YIL103W	DPH1	D	-0.600223	-0.955779	-0.0402745	0.597467	-1.00738	-0.286254
YIL103W	DPH1	U	-1.23194	-0.299456	0.528749	0.00790551	-0.781335	0.601517
YKL191W	DPH2	U	0.0314873	-0.414188	-0.603572	-0.480313	-0.259864	0.37735
YLR172C	DPH5	D	0.584054	0.102598	-0.262399	0.0548769	-0.699585	1.50623
YLR172C	DPH5	U	-0.833157	0.326658	-1.66036	0.245465	-0.123842	-0.626973
YDR294C	DPL1	U	0.0588451	-0.636356	-0.153435	-1.0505	-0.433762	0.0321282
YDR294C	DPL1	D	0.657601	-1.91255	-0.190104	-2.02995	-1.87453	-0.735475
YPR183W	DPM1	D	0.201154			2.25068	-0.473501	-1.15404
YDR284C	DPP1	D	-1.70365	0.999718	0.60209	-0.392988	1.17797	-0.581592
YLL018C	DPS1	D	0.326978	-1.22267	-0.260566	-0.860177	0.861939	0.784571
YLL018C	DPS1	D	-0.269423	-1.34196	-0.337375	-0.649556	0.496653	1.2036
YLL018C	DPS1	U	-0.225546	0.488251	-0.680853	-0.992229	-1.19486	-0.129529
YKR071C	DRE2	D	1.26111	0.653934	-0.555849	-0.976307	1.1375	0.318436
YLL008W	DRS1	D	0.118223	0.698526	-1.12098	0.664896	0.745977	-0.291056
YLL008W	DRS1	U	0.335165	-1.01681	0.0200255	-0.206193	0.266875	-0.365662
YAL026C	DRS2	U	0.183251	-0.597498	0.024378	-0.340928	-0.234546	-1.54663
YER124C	DSE1	D	1.53627	-0.665644	-0.218005	-0.660905	0.937647	-0.576764
YER124C	DSE1	U	0.94445	-1.57092	-1.55776	-0.451432	1.41364	0.274472
YHR143W	DSE2	U	-0.21685	-0.440907	-0.725059	-0.264694	-0.858899	0.0185951
YOR264W	DSE3	D	-0.701748	0.880966	-0.0720937	-0.793192	-0.51137	-0.835135
YNR067C	DSE4	D	0.425288	0.206415	0.63065	0.640102	0.250499	0.44217
YNR067C	DSE4	U	-0.210849	1.07557	-0.186535	0.587372	1.05204	0.022171
YBR007C	DSF2	D	0.996442	-0.269805	1.74634	-0.317205	0.248032	-1.73506
YBR007C	DSF2	U	0.522193	1.67271	0.149952	0.33995	-0.241459	-0.569493
YMR276W	DSK2	D	-0.694	0.395188	-0.316426	-0.331666	0.0426267	-0.508297
YMR276W	DSK2	U	-0.27247	-0.118847	0.243261	-0.643926	1.2026	0.0354715
YNL258C	DSL1	D	0.594885	0.229225	-0.136821	1.19437	0.446202	0.408504
YNL258C	DSL1	U	1.63029	0.897773	0.309555	-0.931842	1.14419	-0.271326
YIR010W	DSN1	U	2.06488	0.0157018	-0.627695	-0.497881	0.0860807	1.98681
YPR017C	DSS4	D	0.985556	1.59775	1.37357	0.225826	-0.00204804	0.122201
YPR017C	DSS4	U	-2.55448	-0.100585	3.49296	-0.880311	-1.79744	-1.89652
YGL043W	DST1	U	0.399812	-0.750252	-2.29834	-0.857224	-0.134538	0.127222
YDL219W	DTD1	D	-0.204336	-0.752386	-0.845295	-0.860159	0.580528	0.260454
YBR180W	DTR1	D	0.976729	-0.711236	-0.214187	1.69533	-0.425966	1.31861
YBR180W	DTR1	U	0.596041	-0.258437	-1.01487	-0.121055	-1.33902	0.031647
YDL101C	DUN1	D	-0.213046	-0.937183	-0.0192943	0.391191	-0.764111	-0.0355197
YDL101C	DUN1	U	0.376062	2.06003	-1.37758	0.556679	0.985309	0.0101032
YGL061C	DUO1	D	-0.00873996	-0.489865	0.70414	1.3422	-0.573109	-1.19038
YGL061C	DUO1	U	0.876137	-0.637255	0.372356	-0.189233	-1.53752	-1.65374
YBR208C	DUR1,2	D	0.993273	0.39193	1.01171	-1.61127	0.064913	-2.33838
YBR208C	DUR1,2	U	-0.511016	-0.936099	0.150528	-1.79747	0.389607	0.44131
YML080W	DUS1	U	1.46522	0.247804	1.15783	-0.0562989	2.97791	0.742096
YLR401C	DUS3	U	-1.80685	-0.00839447	-0.312607	1.07484	-1.2841	0.243477
YLR405W	DUS4	U	-0.0328305	-0.534368	0.756109	-1.03256	-3.1499	0.216881
YBR252W	DUT1	D	0.149344	-0.0327885	0.728831	-0.322976	-0.265925	-0.705627
YKR054C	DYN1	U	-1.38941	0.658399	-0.0215067	-0.0748826	-0.738028	-1.22683
YDR424C	DYN2	D	0.947228	0.293909	0.631214	-1.16943	-0.541467	-0.926225
YDR424C	DYN2	U	-0.296085	-0.518422	0.196239	0.220664	-0.169906	-0.748594
YMR299C	DYN3	D	0.5485	-1.06276	0.598861	-0.0765969	-0.293471	0.723466
YMR299C	DYN3	U	1.19545	0.739857	1.03671	-0.318871	0.542224	0.512979
YHR068W	DYS1	D	0.575447	-0.0313808	0.392778	-0.444026	0.414844	0.857389
YHR068W	DYS1	U	0.419836	-0.274494	-0.695688	0.341938	0.641786	0.127063
YPR023C	EAF3	D	-0.167782	-1.51913	0.881078	-0.0899897	0.0668522	0.0994602
YPR023C	EAF3	U	-0.354343	-0.441255	-0.188307	-0.637686	0.233495	0.135533
YEL018W	EAF5	D	-2.61159	0.317039	0.560461	-0.402428	0.465917	0.730156
YEL018W	EAF5	U	-1.18978	0.715857	-0.994381	-0.00837407	0.357865	0.759756
YJR082C	EAF6	U	-0.343747	-2.57945	1.38614	0.158688	-0.114258	-0.101355
YNL136W	EAF7	D	1.64943	0.189249	-0.0414835	2.40222	-1.08639	0.280756
YNL136W	EAF7	U	-0.596562	-0.386246	0.190088	-0.725364	-1.47543	0.650739
YKL204W	EAP1	D	-0.024015	0.288664	1.55641	-0.312872	-1.11311	-0.117416
YKL204W	EAP1	U	-0.304325	-0.976672	-0.119345	0.771443	-0.603887	0.235302
YKL172W	EBP2	U	0.673997	-1.02019	0.158176	0.92907	-0.797444	-1.57245
YDR206W	EBS1	D	0.069408	-0.715995	0.577487	0.0501236	-0.878031	0.210521
YLR284C	ECI1	D	-0.22865	1.02582	0.36302	0.313757	0.172295	1.07222
YLR284C	ECI1	U	0.513166	0.211797	0.619059	-0.512449	0.0231898	0.172099
YAL059W	ECM1	U	-1.11076	-0.339915	-0.971922	0.38047	-1.18562	-1.71008
YDR446W	ECM11	D		-0.424189	1.27395	0.806914		1.94912
YDR446W	ECM11	U	1.83236	-0.750569	0.673573	0.480608	0.269602	-0.149674
YHR021W-A	ECM12	D	0.389223	1.88612	0.127173	-0.856492	-0.234268	-0.814214
YBL043W	ECM13	D	0.840625	-0.88247	1.97442	0.527772	0.0864528	1.56539
YHR132C	ECM14	D	0.143907	1.28656	0.67604	-0.111068	0.466591	0.472917
YHR132C	ECM14	U	-1.0999	0.819373	-1.3798	-0.300735	-1.65403	-1.45836
YMR128W	ECM16	D	0.0545461	-0.725476	0.846614	-0.467459	-0.124151	-0.534856
YMR128W	ECM16	U	-0.0970177	-0.333493	-0.517887	0.281376	-0.154126	-0.301233
YJR137C	ECM17	D	1.13609	1.24928	2.00075	0.618747	0.773235	1.13092
YJR137C	ECM17	U	1.82577	-0.076289	0.18892	0.79093	1.08442	0.214201
YDR125C	ECM18	D	0.175812	-1.53697	1.28438	0.355021	0.532886
YDR125C	ECM18	D	-0.72393	-0.231599	-0.142653	0.584178	0.303143	0.0859276
YDR125C	ECM18	U	0.331362	-1.00866	-0.426062	-0.253698	-0.51582	-1.05561
YLR390W	ECM19	D	0.715522	-1.08794	0.886169	1.2806	0.29332	-1.14867
YBR065C	ECM2	U	1.09945	-1.30433	-0.796733	1.11995	-0.056103	-0.371043
YBL101C	ECM21	D	0.25656	-0.462534	-1.17399		2.14182	0.23741
YBL101C	ECM21	U	-0.358178	-1.62856	1.05213	-1.12845	-0.868807	0.166586
YLR228C	ECM22	U	0.347576	1.34155	0.207111	-1.6277	1.46458	1.09216
YPL021W	ECM23	D	-0.611948	-0.471903	-0.891401	-0.344706	-0.244522	1.60111
YPL021W	ECM23	U	0.242853	0.507063	-0.0765855	1.80921	1.68907	0.105774
YJL201W	ECM25	U	-3.00595	-0.399637	-0.517067	0.907569	-1.03363	-0.890336
YJR106W	ECM27	D	0.65225	-0.125996	0.324113	-0.125985	-0.53719	0.200354
YJR106W	ECM27	U	-0.305925	0.21017	0.214312	0.724992	0.230377	-0.404085
YHL030W	ECM29	U	1.0087	0.691163	0.942631	-0.794828	-0.529724	-1.43202
YHL030W	ECM29	D	-2.34962	-0.57255	-1.19051	0.0747939	0.241742	-1.05409
YOR092W	ECM3	D	-0.163453	-0.5779	-1.54266	-1.6875	-1.05838	-0.490342
YLR436C	ECM30	U	-0.469969	1.07771	-1.81669	-2.37454	-0.28192	-1.67248
YBR176W	ECM31	D	-0.0372387	0.664355	0.677191	0.93812	-0.444535	0.875294
YBR176W	ECM31	U	-0.312159	0.257227	0.757292	0.515799	-0.197601	1.00084
YER176W	ECM32	D	-0.382943	-0.677058	-0.253694	-0.868258	0.204685	0.0904229
YER176W	ECM32	U	0.580154	-0.682566	0.47891	-0.671586	-0.369348	0.324436
YBR078W	ECM33	U	-3.19375			-1.2518	-0.213931	-1.43819
YBR078W	ECM33	D	-2.07309	-1.09618	0.705859	-0.021844	-5.67388	-0.374394
YHL043W	ECM34	D	-1.28345	-0.793765	-0.666598	-0.183657	0.131284	-0.155969
YHL043W	ECM34	U	0.736329	-0.863551	-1.55967	-1.30228	-0.802832	1.24173
YIL146C	ECM37	U	1.63362	-0.284896	0.511375	-0.0178908	-0.273663
YIL146C	ECM37	D	0.25451	0.0829564	-0.439967	1.07175	0.20562	-1.28525
YLR299W	ECM38	D	0.704484	0.780805	0.19345	0.334269	-0.248804	0.998274
YLR299W	ECM38	U	-0.865678	1.04304	0.582009	-0.0888221	0.403733	-1.24243
YKR076W	ECM4	D	0.706	-0.0300954	-0.406334	-0.28449	-0.244678	0.852231
YKR076W	ECM4	D	0.678818	-0.607555	-0.294355	-0.568012	-0.00652655	0.639203
YKR076W	ECM4	U	-0.486687	1.02609	0.115752	-0.417839	0.33303	1.21154
YMR062C	ECM40	D	-0.0684128	0.94861	-1.27023	1.05024	-0.267583	0.842551
YMR176W	ECM5	D	0.264899	-0.106018	0.236378	-0.454253	1.14038	-1.58803
YMR176W	ECM5	U	0.228161	-0.564694	0.0112376	-0.307619	-0.681106	1.42403
YLR443W	ECM7	D	-0.807967	0.635788	0.32339	-0.392831	-0.211199	2.98348
YLR443W	ECM7	U	-1.28473	-0.586648	0.0585137	-0.352069	0.201783	1.43259
YBR076W	ECM8	D	-0.872742	-0.786601	-0.353886	-0.317025	0.274403	-0.568476
YBR076W	ECM8	U	-0.820112	0.0804452	1.0017	0.50864	1.61492	0.118873
YKR004C	ECM9	D	-0.306099	0.524547	0.302677	0.104137	-0.311546	0.66203
YKR004C	ECM9	U	0.515008	1.09918	0.18112	-0.309526	0.808046	0.634179
YKR004C	ECM9	U	0.423286	1.21218	0.835974	-0.205808	0.372573	0.676795
YFR027W	ECO1	D			-2.31726	-0.853825	-0.704108	-1.8764
YFR027W	ECO1	D	2.13724	-0.527098	-2.94281	-0.354393	-0.532331	-0.565959
YFR027W	ECO1	U	-2.28424	-0.648752	0.502883	-0.477157	-0.12711	-1.4976
YGL222C	EDC1	U	-1.10528	0.370479	-0.545963	0.292527	-1.04904	0.915863
YGL222C	EDC1	D	-0.287326	-1.36812	-1.01944	-1.46492	-1.03961	-0.234563
YER035W	EDC2	D	-0.0552566	0.0672941	0.64985	-0.844091	0.875447	0.645521
YER035W	EDC2	U	1.77118	0.60464	0.888895	-1.33991	0.784968	-0.230194
YEL015W	EDC3	D	0.407319	0.354637	1.94979	1.10639	2.36642	0.306548
YEL015W	EDC3	U	0.320123	0.325334	1.59923	-1.35282	-0.19626	2.05198
YBR033W	EDS1	D	-2.20013	-1.19975	0.400715	0.278011	-0.00983314	0.283684
YBR033W	EDS1	U	0.121285	0.349513	-0.310715	0.0883412	0.251906	-0.107272
YPL095C	EEB1	U	0.157541	1.77135	-0.94529	-0.0369344	-0.314657	-1.16264
YAL003W	EFB1	U	-1.33145	1.14271	-0.122686	1.46213	0.224788	-0.668123
YOR133W	EFT1	D	-0.864411	-0.440491	-1.60115	-1.09809	1.16749	0.172847
YDR385W	EFT2	D	1.58644	-0.11641	-0.197686	-0.132664	-0.446847	0.94746
YHR193C	EGD2	D	0.0112063	-0.607632	-0.36039	0.13581	-0.382024	0.145621
YHR193C	EGD2	U	-0.631413	0.590402	-0.64387	-1.27681	-0.204723	-1.38596
YNL327W	EGT2	D	-0.742307	0.444109	1.02201	-0.599847	-0.185372	-0.295753
YNL327W	EGT2	U	-0.0429349	-0.791288	-0.938213	-0.950424	-1.17323	-0.669009
YDR036C	EHD3	D	-0.752033	-0.154098	0.550583	0.720935	-0.419967	0.905137
YDR036C	EHD3	U	-0.0525108	0.225646	0.217006	-0.364939	-0.622576	-0.172032
YBR177C	EHT1	D	-0.221992	-0.631926	-1.25702	1.06546	-1.66088	-0.875477
YBR177C	EHT1	U	1.10161	-1.45079	-0.109352	0.976771	-0.450732	-0.912328
YNL230C	ELA1	D	0.786179	0.668637	-0.348729	-0.0864751	0.121079	0.879994
YPL046C	ELC1	D	0.308492	0.733377	-0.359928	0.862346	0.365673	-1.40139
YKL160W	ELF1	D	-0.552663	-1.09798	0.293315	-0.683016	0.815958	0.168794
YKL160W	ELF1	U	0.512923	1.18232	1.3881	0.151314	-0.269556	-0.931104
YOR144C	ELG1	D	1.82298	1.71812	-0.33772	-0.879312	-0.493468	-0.217211
YOR144C	ELG1	U	-0.769565	-0.350551	-0.953813	2.02195	0.798576	0.651433
YKL048C	ELM1	D	0.723221	0.458014	-0.40785	-1.75424	-0.157694	-0.812161
YKL048C	ELM1	U	-0.0526998	0.364705	0.949115	0.749922	-0.0114609	1.09107
YJL196C	ELO1	D	0.0695255	0.0164605	0.667939	-0.456363	-0.197071	-0.583216
YJL196C	ELO1	U	-0.422835	-0.303908	0.32793	-0.782515	0.166747	0.635419
YGR200C	ELP2	U	-0.175973	0.494795	0.306362	-0.486904	0.793843	-0.145798
YPL086C	ELP3	U	-1.74416	0.0504667	0.0998994	0.485178	-0.801317	0.386069
YPL101W	ELP4	D	0.646124	-1.82056	0.0507907	2.1659	0.0160087	1.09816
YPL101W	ELP4	U	0.490963	-0.340387	0.795879	-3.7407	0.481739	1.08987
YMR312W	ELP6	D	0.792285	1.24667	-0.482616	-0.424796	-0.818395	-0.516331
YMR312W	ELP6	U	0.677065	-0.448583	-0.168277	-0.538832	0.888782	0.277292
YLR186W	EMG1	D	0.610006	0.681702	0.20546	-0.116514	0.577051	-1.23354
YLR186W	EMG1	D	-0.24966	0.287107	0.67657	0.831138	1.22637	0.929913
YLR186W	EMG1	U	-1.09868	-0.826648	-0.832486	-1.63013	1.12314	0.593296
YLR186W	EMG1	U	-0.787233	-0.601575	-0.868317	-1.10406	1.12376	1.36482
YLR186W	EMG1	U	0.233616	1.09544	-0.678948	-0.746511	0.689252	-0.287327
YLR186W	EMG1	U	0.989035	1.3011	-0.347342	-0.0839876	0.680038	-0.397798
YDR512C	EMI1	D	-0.156091	-0.239532	0.108085	-1.52373	-1.06166	-0.0905611
YDR512C	EMI1	U	-0.0333272	-0.276486	0.434433	-0.444899	-0.255297	-0.0528511
YDR516C	EMI2	D		1.08976	3.92703		3.05085	1.04182
YDR516C	EMI2	U	-2.01893	-0.321961	3.79481	-0.539361	-1.58748	-2.35196
YOL071W	EMI5	U	-0.316612	0.766635	0.591675	-0.285039	0.0662963	-0.871256
YLR080W	EMP46	D	-1.60175	-0.255475	1.28356	0.708453	-0.171031	-1.06185
YLR080W	EMP46	U	-2.1056	-1.44896	0.0580621	-0.666465	0.103841	-0.358977
YFL048C	EMP47	D	-0.5436	0.683079	0.874106	-0.319332	-0.547703	0.118299
YLR083C	EMP70	D	-0.821006	0.386771	0.680833	-0.804988	-0.0459613	1.592
YOL158C	ENB1	D	-0.532338	-0.139968	-0.4723	0.148454	-0.293942	1.24976
YOL158C	ENB1	U	-0.869809	0.414275	-0.556787	0.0286346	-0.117308	0.877506
YNL084C	END3	D	0.620839	0.402309	1.10494	0.810793	0.0767852	-0.132257
YNL084C	END3	U	0.897287	-0.44571	0.759712	0.145259	-0.116652	0.872166
YBR247C	ENP1	D	-1.16969	0.390114	0.583032	1.32361	0.369007	-1.45117
YBR247C	ENP1	U	0.0286925	0.37016	-0.0104782	1.44574	-0.0536877	1.20571
YGR145W	ENP2	D	-0.802946	-0.956597	-0.0935723	-0.502384	-0.660194	0.124243
YGR145W	ENP2	U	0.0952614	-0.402488	-0.276777	-1.26719	-0.341615	0.218928
YDL161W	ENT1	D	0.0115937	0.136652	0.380613	0.16285	0.17859	1.04871
YDL161W	ENT1	U	-0.241545	0.370097	0.692835	1.22133	-0.00197118	-0.0850021
YLR206W	ENT2	D	0.871905	0.101017	-0.609052	-1.06166	-0.885085	0.462749
YLR206W	ENT2	U	0.672075	-0.0501814	0.628109	-0.155004	0.337869	1.10202
YJR125C	ENT3	U	1.0855	2.71525	2.19149	3.19622
YJR125C	ENT3	D	-0.837676	-0.243813	0.955297	0.752742	0.293994	1.30541
YLL038C	ENT4	D	1.0324	-1.28002	-0.727673	-1.56845	0.280561	-0.343634
YDR153C	ENT5	U	-0.39324	-0.341608	0.92459	0.156789	0.164923	-0.831727
YFL024C	EPL1	D	-0.730234	-1.03142	-0.375683	0.105436	-0.438967	-0.993864
YIL005W	EPS1	D	1.26796	1.01071	-0.248256	-0.0777329	-0.841679	0.551302
YHR123W	EPT1	D	-0.191105	-0.727292	0.444928	0.784367	-0.66921	-0.0831845
YHR123W	EPT1	U	-0.244428	-0.967719	0.50348	-0.411656	-0.476126	0.0525826
YDR414C	ERD1	D	0.0839043	-0.86442	-0.398592	1.26151	-0.82354	-0.481012
YDR414C	ERD1	U	-0.236893	-0.511114	1.58231	-0.271287	-1.21773	1.0519
YBL040C	ERD2	D	-1.38943	0.390792	0.726188	0.337352	-0.573162	-0.215306
YBL040C	ERD2	U	-0.321009	0.663332	-1.03017	0.0264228	-1.30878	0.472915
YLR246W	ERF2	D	-0.751624	-0.453395	-1.02671	0.55343	0.669844	-0.76083
YLR246W	ERF2	U	0.492822	1.19197	0.487383	1.1583	0.82502	0.0146519
YGR175C	ERG1	U		-0.317681	-0.0081297	-1.35264		0.255193
YGR175C	ERG1	D	0.269882	1.6346	-0.568285	-1.40961	-0.973442	0.13864
YPL028W	ERG10	U	1.01545	0.651124	-0.385451	0.0353503	1.03485	0.305237
YPL028W	ERG10	D	-2.64764	-1.56172	-1.02633	-1.74639	-1.20463	-3.9145
YHR007C	ERG11	D	-0.616939	-0.055155	-0.546476	-0.488101	-0.369507	0.784086
YHR007C	ERG11	U	-0.238478	0.645899	-0.244097	0.143031	0.138177	-1.21594
YMR208W	ERG12	D	0.945358	0.307752	-0.498488	0.778219	-0.338433	-1.58404
YMR208W	ERG12	U	-1.02283	-0.910208	-0.719289	0.341861	-0.441362	-0.200481
YML126C	ERG13	D	-0.0582813	-0.0680203	-0.691726	-0.513367	-1.45223	-0.00756443
YML126C	ERG13	U	0.146219	-0.881487	-0.429023	-0.177868	-0.62936	-0.310224
YMR202W	ERG2	D	-2.92539	-2.42401	1.42146	-0.84122	0.392667	-0.939191
YMR202W	ERG2	U	0.560334	-0.359376	-1.04074	-2.02247	-0.955061	-0.411021
YJL167W	ERG20	U	-0.0792207	0.999252		1.19161	0.734249	1.76164
YNL280C	ERG24	D	-0.96639	0.125569	-0.356227	1.47269	-0.706629	-0.925143
YNL280C	ERG24	D	-1.10732	0.252811	-0.0104128	1.69787	-0.434294	-0.773453
YNL280C	ERG24	U	0.433168	1.17172	0.195364	0.0602543	0.898762	1.02341
YGR060W	ERG25	D	0.0360115	0.572138	1.26694	-0.0925544	-0.393945	-0.529167
YGL001C	ERG26	U	0.559063	-0.106697		0.786606	-0.20334	-0.160366
YGL001C	ERG26	D	-0.93787	0.353704	-0.283424	-0.0869923	0.579855	0.308521
YLR100W	ERG27	D	0.639667	-0.62571	-0.108382	-1.00543	1.11326	0.927334
YER044C	ERG28	D	0.171728	0.0543435	-1.52705	0.31235	-0.0820924	1.3112
YER044C	ERG28	U	-0.600156	-1.66508	-1.05616	-0.619982	-0.817781	-0.16424
YLR056W	ERG3	U	0.421504	0.580176	0.0740691	0.759664	1.14516	-0.584405
YGL012W	ERG4	U	0.318666	0.244785	0.550429	-0.385545	1.41499	-0.27503
YMR015C	ERG5	U	0.194078	-1.09999	-0.443605	-0.608518	0.605835	-1.68139
YML008C	ERG6	U	-0.916314	0.906671	1.15881	-1.00671	-0.203548	0.462494
YHR072W	ERG7	D	-0.393463	-0.184166	-0.120825	0.455449	-0.338555	0.817275
YMR220W	ERG8	D	-0.366309	0.821434	-0.534997	0.620913	0.904417	-0.0318751
YMR220W	ERG8	U	0.221262	1.08582	-0.68676	-0.190361	0.673465	-0.165432
YHR190W	ERG9	D	-0.903263	0.21143	-0.712026	-0.343067	0.22168	0.505178
YHR190W	ERG9	U	0.775019	1.0454	-0.91773	0.686431	-0.500498	0.140822
YFR041C	ERJ5	D	-0.338848	-0.37885	-2.24315	-1.4754	-0.369234	1.20937
YFR041C	ERJ5	U	3.14353	0.12325	1.51418	0.318533	0.0949986	0.864119
YML130C	ERO1	D	-0.0895033	-0.675435	0.20492	-0.387023	0.567685	-0.52479
YML130C	ERO1	U	0.474149	0.249707	0.423297	-0.5182	0.155029	1.50589
YML130C	ERO1	U	0.866019	0.152161	0.35227	-0.51156	0.38719	1.84163
YAR002C-A	ERP1	D	-1.14026	0.0496251	0.670533	0.24659	0.968834	-0.431367
YAR002C-A	ERP1	U	-0.467925	0.803802	0.860415	-0.655993	-0.0236581	0.301908
YDL018C	ERP3	D	0.406813	-0.808771	-0.232107	-0.0478092	-0.669147	-0.295954
YDL018C	ERP3	U	-0.562047	0.318649	-0.0709115	-0.411515	0.156398	0.291495
YOR016C	ERP4	D	1.56904	-0.72542	1.13761	-1.35557	-0.136657	-1.68658
YHR110W	ERP5	D	-0.530312	0.795621	-0.0263151	-0.793694	-2.75886	1.16364
YHR110W	ERP5	D	-0.958421	-0.0159473	-0.140199	-2.0708	-1.99742	1.12885
YHR110W	ERP5	U	-0.110737	-0.343313	0.972359	0.00174833	0.437766	-0.573851
YGL002W	ERP6	D	-0.179048	0.849229	0.775119	0.410221	2.89164	-1.32179
YGL002W	ERP6	D	0.33139	0.269569	0.107976	-0.235924	1.79062	-1.88317
YCR075C	ERS1	D	0.930111	-0.102967	0.637657	0.485504	0.0367331	1.06943
YCR075C	ERS1	U	-0.340455	-0.219411	0.155168	-0.747244	-0.686752	-0.914211
YGR029W	ERV1	D	-1.49826	-1.18675	-0.0554729	-0.501524	-0.302299	0.42029
YGR029W	ERV1	U	-0.747431	1.67626	-0.383416	0.377816	0.386888	-0.486894
YGL054C	ERV14	D	-0.449926	-2.93685	-1.09312	-0.295186	0.11872	0.0229054
YBR210W	ERV15	D	0.931367	-0.353704	1.8381	0.477086	0.950131	2.06331
YBR210W	ERV15	U	-1.7652	-0.244642	-1.09317	0.938691	-0.585746	1.10025
YPR037C	ERV2	D	-1.90534	0.963783	-0.184062	-0.239048	0.219543	2.56836
YPR037C	ERV2	U	-0.334749	-0.622532	0.366029	0.251535	1.26317	-0.611685
YML012W	ERV25	U	0.0491629	0.544586	0.69632	-0.884436	1.35733	-0.249734
YGR284C	ERV29	D	-0.310974	1.72773	1.47531	-0.739333	-0.369098	1.08728
YGR284C	ERV29	U	-0.259803	-1.06521	-0.851271	0.0240638	-0.753256	-1.42105
YML067C	ERV41	D	0.593552	0.422149	1.92309	-0.74657	-0.769326	-0.223305
YML067C	ERV41	U	0.320949	0.316612	1.15777	1.27432	0.274522	0.585255
YAL042W	ERV46	U	-0.488196	-0.179375	-0.866983	-0.406276	-1.21507	0.0592318
YOR244W	ESA1	D	0.364326	0.65223	1.6591	1.98247	-1.91559	-1.78563
YOR244W	ESA1	U	-1.76076	-1.11399	-0.939875	0.439306	-0.62992	-0.966061
YNL125C	ESBP6	U	-0.73781	-0.194595	-0.339249	-0.378257	-1.76056	-0.0841452
YNL125C	ESBP6	D	0.0958164	-0.675868	-1.17705	-1.93612	0.106356	-1.05437
YMR219W	ESC1	D	-0.133211	-0.92682	0.0165511	0.407555	-0.563567	-0.265226
YMR219W	ESC1	U	0.428365	0.0151956	-0.18946	-0.00608489	-0.357964	-0.162023
YDR363W	ESC2	D	0.689388	0.326323	-0.940297	-1.17417	-0.261266	0.835961
YDR363W	ESC2	U	-1.81076	-0.185922	-0.0380213	-0.12746	0.273418	0.40752
YOL017W	ESC8	D	-0.514778	1.20016	-0.156951	-0.0272126	1.818	0.486033
YDR365C	ESF1	U	-0.171569		1.0711	0.116596	0.767872	1.43805
YDR365C	ESF1	D	-0.254522	0.565718	-1.58387	0.248933	-0.185807	0.691189
YNR054C	ESF2	D	0.417218	-0.576856	0.49136	1.0904	1.03063	-1.69431
YNR054C	ESF2	U	0.0895429	-0.299949	-0.22363	-0.763633	0.12882	0.640116
YGR098C	ESP1	D	1.82203	-2.1028	-0.587093	-0.387106	0.0756915	0.885544
YGR098C	ESP1	U	1.31631	-0.506933	-1.16767	-0.695995	-0.761676	-3.22565
YJR017C	ESS1	D	0.181433	0.507664	0.552928	2.3296	1.17581	0.0304122
YLR233C	EST1	U	0.197853	-0.892138	0.252876	0.00999309	-2.4967	-0.507345
YLR318W	EST2	D	0.682638	0.177752	1.03637	0.100176	0.576043	-0.167311
YLR318W	EST2	U	-0.0247198	1.41419	0.307622	0.540931	-0.125432	-0.717105
YIL009C-A	EST3	U	-0.207234	1.22912	-0.326585	0.325565	-1.15582	-0.617767
YBR026C	ETR1	D	-1.39499	-1.25357	0.901979	-0.428084	0.0671921	-1.86168
YBR026C	ETR1	U	-1.45742	-2.85276	-2.37727	-3.33957	-0.773345	-0.620623
YLR300W	EXG1	D	0.261037	0.0146382	1.38113	0.279175	-0.498421	-0.54211
YLR300W	EXG1	U	0.158254	0.768866	0.685834	-0.323117	0.862508	-0.864514
YDR261C	EXG2	D	-0.756242	0.449373	1.00509	0.0452721	0.711515	-0.379265
YDR261C	EXG2	U	-0.894264	-0.194088	-0.305764	0.171616	-0.0353413	0.733845
YOR033C	EXO1	D	-0.477472	-0.353285	-0.969497	0.439828	-0.196303	0.166783
YOR033C	EXO1	U	-1.00815	1.19695	-1.71269	-1.08302	-0.109574	-0.587282
YJL085W	EXO70	D	0.485463	0.0651685	0.316865	-0.0929081	0.585783	-1.30319
YJL085W	EXO70	U	-0.756957	0.595406	-0.152444	-0.512674	-2.28533	0.729748
YBR102C	EXO84	D	0.198888	-1.00108	-0.515557	-0.0542641	0.0103153	-0.685428
YOR317W	FAA1	D	0.259435	0.260039	0.102268	-1.04238	1.92053	-0.453163
YOR317W	FAA1	U	-0.931204	0.711187	-0.107939	0.450417	0.799553	1.03065
YIL009W	FAA3	D	0.109028	0.646683	-0.2099	-0.487876	-0.881006	0.928891
YIL009W	FAA3	U	-0.209054	-0.557783	-1.3193	0.322316	0.0498665	-0.62525
YMR246W	FAA4	D	-0.764751	0.627709	-0.281222	-0.144095	0.931967	-0.408942
YMR246W	FAA4	U	0.227078	0.248075	-0.449822	0.276694	-0.123223	-0.471895
YFR019W	FAB1	D	-0.0227594	0.778245	0.0493596	0.323859	1.26177	0.828767
YDL045C	FAD1	U	0.422376	0.290453	-0.486507	0.579174	0.224501	0.685221
YIL019W	FAF1	D	-0.0882542	1.67803	-0.181756	1.21851	0.604931	0.774637
YIL019W	FAF1	U	-0.142219	0.852355	-0.372179	-0.521163	-0.740259	0.735086
YDR021W	FAL1	D	-0.598317	-1.12243	-0.376132	-2.0484	1.0068	0.455031
YDR021W	FAL1	U	-0.0125009	0.00187798	-2.36063	-1.60245	-1.60469	0.0718332
YDL166C	FAP7	U	-0.326723	-0.268583	0.603626	-1.31939	0.0606239	0.744741
YJL157C	FAR1	D	-0.426485	-1.1559	-0.708519	-0.00937044	-0.777687	-2.48285
YJL157C	FAR1	U	0.537805	-0.945297	-0.0674099	-1.51591	-0.370637	0.400528
YLR238W	FAR10	D	-0.520128	-0.166993	1.17301	-0.0342103	0.196025	-0.214891
YNL127W	FAR11	U	-1.12958	-0.886173	-0.656874	0.342334	-2.48612	-0.67732
YNL127W	FAR11	D	-1.19813	-0.099428	0.124471	-1.7538	-0.968181	-1.05106
YMR052W	FAR3	D	0.12351	-0.351732	0.196311	-0.434817	0.19447	0.951133
YMR052W	FAR3	U	0.182191	0.393984	-0.209834	0.543485	-0.00733101	0.250042
YFR008W	FAR7	D	-1.19809	-1.37533	-1.8431	-1.24608	-0.0117915	-2.06762
YMR029C	FAR8	U	-1.06965	-0.590239	-0.260772	0.302256	-1.22067	-0.327521
YKL182W	FAS1	D	0.72073	0.305855	-1.55788	0.636165	-0.528734	-0.593179
YKL182W	FAS1	U	-0.513278	-0.836026	0.694255	2.66922	0.0795302	-0.14252
YPL231W	FAS2	D	1.81301	-0.19915	0.0781992	0.598791	-0.228733	-3.05968
YPL231W	FAS2	U	2.72134	-1.65023	-1.28949	0.960121	0.223592	-1.12866
YBR041W	FAT1	U		0.805972		0.663558	0.148562	-0.675174
YER183C	FAU1	D	-0.397146	-0.461855	-0.246477	-0.937856	-0.56657	-0.306169
YER183C	FAU1	U	-0.686531	-0.212061	-0.00790691	0.648401	0.00975939	0.516705
YLR377C	FBP1	D	0.815316	-1.18246	-0.968765	-0.599861	1.34855	0.298421
YJL155C	FBP26	D	1.26423	0.17036	0.758356	1.22846	-0.308421	0.180365
YJL155C	FBP26	U	-0.260822	0.0831741	0.232751	0.441782	-0.662099	0.54428
YDR339C	FCF1	D	0.205565	-0.449145	0.180596	-0.923295	0.431478	0.378074
YDR339C	FCF1	U	-0.848371	-0.106914	1.09162	-0.650326	-0.487064	-0.42951
YLR051C	FCF2	U	-0.297351	0.207279	-0.802656	-1.2781	0.636423	-0.270101
YLR051C	FCF2	D	0.399576	-3.01612	0.751896	-1.44754	-0.729665	-3.38107
YMR277W	FCP1	D	-0.884797	-0.395607	-0.29276	-0.0783724	-0.601462	-0.350426
YMR277W	FCP1	U	0.156292	-0.242786	0.302181	0.00838487	-0.266504	-0.495727
YPR062W	FCY1	D	-0.768471	-0.0282655	0.172646	-0.273888	-0.856587	-0.683233
YPR062W	FCY1	U	0.120194	0.065637	0.782885	1.00338	0.572887	0.429623
YER056C	FCY2	D	0.513617		-2.0462	-3.07987	-4.54496	0.189536
YER060W	FCY21	D	0.154443	-0.0967096	-0.840996	0.907202	-1.6512	-0.668381
YER060W	FCY21	U	-0.73334	0.769659	0.369222	-0.235878	1.16357	-0.919601
YER060W-A	FCY22	D	-0.587727	0.407307	-0.6342	0.16098	1.37022	-0.787073
YER060W-A	FCY22	U	0.381404	0.287344	-0.802426	0.177587	1.22745	-1.34072
YCR034W	FEN1	D	0.0733197	0.812658	0.080763	-0.625072	-1.15067	-1.73052
YCR034W	FEN1	U	-0.375428	0.118315	0.698987	-0.867428	0.0107367	-2.1585
YCR028C	FEN2	D	-0.506882	2.3393	1.34936	-0.494254	-0.97741	1.08028
YCR028C	FEN2	U	-0.497877	0.555587	0.101705	0.332901	-0.734306	-0.789864
YMR058W	FET3	D	-0.710988	-0.460487	-0.541689	-0.522066	-0.0215582	-0.500803
YMR058W	FET3	U	0.79057	1.08932	0.410936	0.157333	-0.0677043	0.645525
YMR319C	FET4	D	-1.92587	-0.0685216	1.96726	0.982222	-0.299259	0.704016
YMR319C	FET4	U	-0.778009	1.14974	-0.997098	0.596639	0.194189	0.0840722
YFL041W	FET5	D	-0.433045	-0.678367	-0.543734	-0.336292	-1.11118	-0.534904
YFL041W	FET5	U	-0.185454	-0.207152	-0.0653762	-0.24146	-1.09345	-0.378172
YBR040W	FIG1	D	2.1934	1.74363	1.88452	1.05587	1.11417	1.70285
YBR040W	FIG1	U	-1.67176	-0.209348	0.275928	0.0540774	1.57537	-0.0936202
YCR089W	FIG2	D	-0.0453111	0.351343	0.237992	0.672303	0.566941	0.149374
YCR089W	FIG2	U	0.391978	0.121922	0.0431504	-0.563014	0.335597	0.184337
YNL325C	FIG4	D	-0.0826571	-0.361032	-0.14347	0.115894	-0.126761	-0.229065
YNL325C	FIG4	U	0.0981064	-0.110809	-0.723912	0.0277839	-0.0784648	0.258377
YDR130C	FIN1	U	0.518654	0.0320463	-1.74802	-0.37523	-0.152303	0.297981
YJR093C	FIP1	D	1.45477	-0.959513	1.83687	-0.758649	0.794671	1.9238
YJR093C	FIP1	U	0.568267	1.19528	0.939378	0.792486	-0.0358557	1.21945
YER032W	FIR1	D	-0.857166	0.494489	-0.210811	2.64712	-0.53026	0.0331592
YER032W	FIR1	U	-3.9649	-2.07236	-0.841963	-1.54253	-2.96049	-1.48407
YIL065C	FIS1	D	-0.0271697	-0.17967	0.251304	0.683787	0.300457	0.628123
YDR534C	FIT1	D	0.524553	0.807994	-0.298225	-1.64686	0.261241	0.436969
YDR534C	FIT1	U	1.00817	-0.619933	0.757324	-0.926493	-0.436174	-0.410421
YOR382W	FIT2	D	-0.611717	-1.27639	-1.12378	-0.744169	-0.204817	0.245379
YOR383C	FIT3	U	1.39537		-0.22758	-0.299353	0.457958	-1.84631
YOR383C	FIT3	D	-0.421183	-0.187875	0.593972	0.439141	0.372678	-4.5608
YIL131C	FKH1	D	1.24541	0.953675	-0.571931	1.20811	0.844559	0.911022
YNL068C	FKH2	U	-0.0143491	1.98747	1.86772	1.15868	1.33013	0.627411
YLR342W	FKS1	U	2.51924	1.44237	-1.05464	-0.982134	0.562795	1.78165
YLR342W	FKS1	D	-2.93504	1.22249	-1.49643	0.757192	-3.10231	-0.573138
YMR306W	FKS3	D	0.229282	-0.692198	0.392171	0.0283344	-0.0811591	0.173618
YMR306W	FKS3	U	0.387574	0.205929	0.375942	-0.161862	-0.97074	0.324121
YPL221W	FLC1	D	1.65594	-1.81117	-0.191418	-0.446481	0.0412711	0.823533
YAL053W	FLC2	U	-0.368242	-0.712736	-0.463228	-0.954952	0.160191	0.182316
YGL139W	FLC3	D	-1.01401	-0.583366	-0.0438179	0.285518	-0.870093	-0.260482
YAR050W	FLO1	U	1.1603	0.119101	1.56722	1.76944	1.92217	1.42201
YAR050W	FLO1	D	-0.156478	-0.705806	-0.14632	-1.33572	0.0596823	-0.925938
YKR102W	FLO10	D	0.3981	-0.83639	-0.0273045	-0.789383	-0.404921	-0.225936
YKR102W	FLO10	U	1.15723	0.0550578	2.14895	0.751158	0.141835	0.628704
YBR008C	FLR1	D	-0.147082	-0.372981	0.392941	-1.30496	-0.235934	-1.06558
YBR008C	FLR1	U	0.165832	0.245752	1.3695	0.615337	1.53493	0.773641
YIL134W	FLX1	U	0.464331	-0.646801	0.0622711	-1.11806	-1.02676	0.951062
YIL098C	FMC1	D	0.554502	0.451065	0.853033	0.968332	-0.217054	-0.321332
YDR236C	FMN1	D	0.372631	-0.56651	-0.0180456	-0.951079	1.18494	-0.188124
YER182W	FMP10	D	0.674252	0.22138	-0.0111649	0.107077	-0.264955	-0.0524931
YER182W	FMP10	U	0.137807	-0.0667204	0.114209	-0.594317	-0.872542	0.0660899
YHL021C	FMP12	D	-0.785806	1.29484	0.00810459	0.482368	0.398965	1.51184
YHL021C	FMP12	U	-0.64937	0.57361	-0.260318	0.275349	1.78435	0.553569
YKR016W	FMP13	D	-1.40578	0.108118	-0.463874	-0.254036	-0.465505	-1.47579
YKR016W	FMP13	U	-0.703491	-0.207757	-0.507245	0.183251	0.123841	0.0246302
YPL099C	FMP14	D	-1.25862	1.31676	-0.875839	-1.3499	-0.0591686	-0.0420933
YPL099C	FMP14	U	-2.36102	0.305171	-0.440634	-1.52641	-0.728224	-0.469545
YDR070C	FMP16	D	-0.980563	-0.282887	0.311837	0.116122	-1.01083	0.697009
YBR269C	FMP21	D	-0.224496	0.108168	-0.20409	-0.522353	-0.0858625	0.191709
YBR269C	FMP21	U	-0.107583	-0.401127	0.167275	0.140176	-0.838941	-0.225952
YHR198C	FMP22	D	-0.590048	-0.223841	-0.359762	0.706968	1.77435	-1.34059
YHR198C	FMP22	U	-0.342692	-0.21961	0.403403	0.923574	-0.486366	0.496911
YBR047W	FMP23	U	-0.0501734			0.182258	-0.617047	1.42016
YBR047W	FMP23	D	-1.10409	-0.639111	0.200491	-1.03467	0.25485	-0.150532
YMR115W	FMP24	D	-0.312027	-0.313485	1.15255	-0.307917	0.286576	0.291408
YLR077W	FMP25	D	-0.782538	0.316045	-0.883225	-0.126877	-0.288494	0.0230346
YLR077W	FMP25	U	1.43934	0.528244	1.18536	0.481484	-0.139066	-0.526396
YJR080C	FMP26	D	0.780601	0.559114	0.553609	0.273933	-1.06211	0.130097
YJR080C	FMP26	U	0.479728	1.09672	0.907322	0.651253	0.704742	0.861453
YLR454W	FMP27	D	-0.616723	1.2524	-1.38915	0.492471	0.154389	0.476386
YLR454W	FMP27	U	1.29074	-0.286973	-0.346447	-0.655362	0.191053	0.136492
YER080W	FMP29	D	-1.03625	-0.563601	-2.73125	1.6199	0.354897	0.832336
YER080W	FMP29	U	-1.3732	1.85457	0.184232	0.352214	0.0398529	-1.81033
YPL103C	FMP30	D	0.801162	-0.714827	-0.736769	0.462932	-0.942026	2.16754
YPL103C	FMP30	U	-0.0609473	-0.0512004	0.396991	0.240107	0.736806	0.406726
YOR286W	FMP31	D	0.966032	1.29972	-1.48118	0.0781985	-0.0353307	-0.549076
YOR286W	FMP31	U	-0.751601	0.419995	0.41522	1.64934	0.55099	-0.20008
YFL046W	FMP32	U	-2.03889		0.0246111	-0.346426	-1.41067	-0.242663
YJL161W	FMP33	D	-0.614768	-0.120714	0.925814	-0.802973	0.299609	-0.3926
YJL161W	FMP33	D	-0.168195	-0.437325	0.9511	-0.747307	0.0938435	-0.0489683
YJL161W	FMP33	U	0.230996	-0.514628	-0.805186	-0.0341558	-0.10752	0.0308437
YHR199C	FMP34	U	0.185544	0.677504	1.16497	0.393011	0.605824	0.20302
YHR199C	FMP34	D	0.28496	-1.30367	0.122071	-1.04694	0.288837	-2.05248
YIL157C	FMP35	D	1.67984	0.221255	0.65468	-0.705444	0.667085	-0.966778
YIL157C	FMP35	U	-0.995533	-0.473436	0.0901302	0.297806	-0.612538	-0.14881
YGL080W	FMP37	D	0.391249	-0.394178	-0.602198	0.880146	-1.515	1.63582
YOR205C	FMP38	D	-0.759003	-1.09875	-1.77402	-0.168894	-0.263454	-0.970992
YOR205C	FMP38	U	-0.560901	-1.04537	-1.76098	0.123176	-0.325561	0.942183
YMR157C	FMP39	D	-0.281057	-0.489231	-0.0144059	1.63534	0.360982	-0.371924
YMR157C	FMP39	U	0.48204	-0.187153	-0.491756	0.100959	0.77266	0.237245
YPL222W	FMP40	D	-0.44927	-0.462867	1.01693	1.82309	1.1854	1.69604
YPL222W	FMP40	U	-1.88476	-0.213625	-6.2357	-0.720666	-0.649213	0.44299
YNL168C	FMP41	D	0.513143	-0.130663	1.12152	-1.13484	1.16651	0.166439
YNL168C	FMP41	U	-1.4042		-1.46541	-2.01902	-1.78961	-2.34008
YMR221C	FMP42	D	-0.0700253	-0.716597	0.195821	1.36116	0.660952	0.316422
YMR221C	FMP42	U	0.212651	-0.274649	-0.0811277	-0.906039	-0.407929	-0.10458
YGR243W	FMP43	U	1.3258	3.25078			3.9141	-0.217067
YGR243W	FMP43	D	-0.0323952	1.25119	-1.26418	-0.664821	-0.318633	0.0840361
YGR243W	FMP43	U	0.197922	-0.822759	-0.305079	-0.121745	1.88916	-0.10767
YDL222C	FMP45	U		0.532854	0.380459	-0.329333	0.867258	0.0922932
YDL222C	FMP45	D	-0.81346	-0.888818	0.134889	-0.388069	-0.154065	0.274886
YKR049C	FMP46	D	-0.561413	-0.890279	-1.13733	-2.56747	1.05362	0.786108
YKR049C	FMP46	U	1.70898	-0.47186	-0.209168	-0.0784186	-0.955844	-0.347308
YGR052W	FMP48	D	0.835379	0.446447	-0.465753	-0.815343	-1.15813	0.724351
YGR052W	FMP48	U	-0.266095	0.177239	2.31748	-0.784759	-0.528237	0.587359
YER038W-A	FMP49	U		0.118404	-1.7516	-3.60521	1.67806
YER038W-A	FMP49	D	-0.554101	3.09694	2.64152	0.150803	-1.86128	-2.14159
YKR027W	FMP50	D	0.857836	1.50798	0.254071	1.18237	0.953968	-0.111636
YKR027W	FMP50	D	0.182968	1.10993	0.254316	-0.622054	0.746063	-1.07017
YKR027W	FMP50	U	-0.251265	0.672171	0.120191	-0.583546	0.389146	0.332584
YBR262C	FMP51	U	1.17894	0.431236	-0.00884595	0.694109	0.350565	-0.888167
YMR020W	FMS1	U	-0.475823	0.561811	0.0625266	-0.303196	0.0233106	-0.447354
YBL013W	FMT1	D	-1.42028	-0.877812		-1.09215		-0.550215
YBL013W	FMT1	U	0.320627	0.430947	0.611048	0.686156	0.400087	0.658474
YDR110W	FOB1	D	-1.98115	-0.180571	1.10131	-0.416006	1.05944	1.43427
YDR110W	FOB1	U	1.11102	-0.630117	0.00224075	0.0740847	-0.439433	-0.134373
YNL256W	FOL1	D	0.78363	0.613909	-0.288326	0.0392524	-0.281048	-0.576209
YGR267C	FOL2	D	0.671583	-1.76533	-0.556344	-1.15041	-0.0829462	-0.758671
YGR267C	FOL2	U	-0.147963	0.667385	-0.782709	-1.40393	1.44532	0.344733
YMR113W	FOL3	D	-0.856938	-1.38622	0.493254	-0.390007	0.474235	-2.74102
YKR009C	FOX2	D	0.859054	-0.97454	1.71347	0.526973	1.87252	-0.0339033
YKR009C	FOX2	U	0.488797	-1.17733	-0.156028	0.152448	-0.125908	-0.111052
YNL135C	FPR1	D	1.40469	2.20182	0.123077	0.445722	-0.342571	0.879324
YDR519W	FPR2	U	0.00856248	-1.0485	-0.813095	0.852774	1.0895	0.116369
YML074C	FPR3	D	0.860877	1.37876	-0.107644	1.348	0.543879	-0.981439
YML074C	FPR3	U	-0.534563	1.35709	-0.123569	0.543431	1.10035	-0.150264
YLR449W	FPR4	D	0.26222	0.173351	0.24992	-1.13725	-0.888404	1.83175
YLR449W	FPR4	U	1.07174	-1.28808	0.681773	-0.731155	-1.05919	0.193664
YLL043W	FPS1	D	1.51153	-0.181159	-1.05185	0.97743	-0.765437	-0.0914518
YLL043W	FPS1	U	-0.542038	-0.918621	-1.20486	-0.19359	-0.206631	0.60946
YLR214W	FRE1	D	-0.609421		1.53692		0.0966386	-0.497184
YLR214W	FRE1	U	1.36127	-1.56527	-3.35555	-0.636464	1.29227	-0.430034
YKL220C	FRE2	D	-0.336555	1.66854	0.963372	1.68298	0.0602247	0.0107575
YKL220C	FRE2	U	-0.45526	-0.230546	-0.392044	-0.414036	0.0876386	0.0823812
YOR381W	FRE3	D	-0.562373	0.727693	-0.143511	-0.593633	-0.120648	0.322656
YNR060W	FRE4	D	-1.06712	-1.38239	-0.94093	1.0756	0.271792	-0.0706831
YNR060W	FRE4	U	-0.158599	-1.11723	0.258359	0.604874	0.214283	0.532674
YOR384W	FRE5	D	2.15636	0.749063	0.640705	0.203423	-0.992252	1.35743
YOR384W	FRE5	U	0.545945	-0.263221	0.229979	-0.666248	0.00123453	-0.569822
YLL051C	FRE6	U	3.71123	-1.76883	-0.163934	0.189337	-1.01707	-0.0914732
YOL152W	FRE7	D	0.115338	-0.969764	-0.664424	0.528081	0.0739548	1.27247
YOL152W	FRE7	U	-0.531286	-1.16705	-0.141574	0.0139298	-0.930484	0.45005
YLR047C	FRE8	U	-1.0836	0.311432	-0.838062	-0.396591	0.733887	0.0725543
YCL026C-A	FRM2	D	0.321116	-0.0441352	-0.139207	0.88374	-0.0409259	-0.0345876
YCL026C-A	FRM2	U	0.484004	-0.480021	-0.532932	-0.0408906	-0.72086	0.59564
YDR373W	FRQ1	D	-1.35587	-0.437972	0.195079	-1.25492	-0.589212	0.67313
YDR373W	FRQ1	U	-0.446959	-0.647412	0.502025	1.04036	0.513056	1.13243
YLR060W	FRS1	U			0.575225	-1.34897	-0.443745	2.35214
YLR060W	FRS1	D	-1.59671	-0.627139	-0.823172	-0.926647	-1.94562	0.197506
YOR324C	FRT1	D	-0.705695	0.101985	0.125164	-0.335695	-2.25222	-1.09822
YOR324C	FRT1	U	-0.23343	1.31705	1.2551	-0.06123	0.333869	0.374913
YAL028W	FRT2	U	-0.290756	0.525939	-1.00729	-1.85349	0.0241536	0.315978
YHR049W	FSH1	D	0.583006	-1.50061	-0.644639	0.060738	-0.54185	0.675809
YHR049W	FSH1	U	0.228463	-0.274132	-0.160447	1.07198	-0.930994	-0.378373
YMR222C	FSH2	D	-0.757922	-0.490804	-1.46457	0.972744	-0.34141	0.0251455
YMR222C	FSH2	U	-0.00293884	0.4421	-0.646049	-0.922148	-1.80455	1.72515
YOR280C	FSH3	D	-2.04365	-0.334245	2.87434	-0.284714	0.617395	0.050681
YOR280C	FSH3	U	-2.70287		-2.28404	-2.09279		-4.35578
YBR207W	FTH1	D	-0.05447	-0.866544	0.167426	-1.14618	-0.725065	0.991827
YBR207W	FTH1	U	-0.272365	-0.403541	-0.398916	-0.950995	-1.99396	-0.0752556
YER145C	FTR1	U	1.737	0.51866	0.515038	1.26026	1.42733	1.5777
YER145C	FTR1	D	0.26094	0.590083	-0.83297	0.282865	1.16357	0.37794
YBL042C	FUI1	D	-1.60576	0.571038	-0.220015	-2.80684	-0.00934026	-0.0704313
YBL042C	FUI1	U	0.195579	2.00206	2.31839	0.959128	0.566967	0.369043
YPL262W	FUM1	U	-1.34459		-3.6813	-4.10047	-3.3542	-3.03667
YAL035W	FUN12	U	-1.04148	-1.31974	-0.454709	-0.916776	-1.1488	-1.37081
YAL008W	FUN14	U	-0.212671	-0.692542	-0.579715	0.128993	0.145175	1.14229
YAL034C	FUN19	U	-1.25282	-0.200769	0.0889201	0.750366	-1.07641	0.442638
YAL022C	FUN26	U	-1.28405	-0.338396	-0.609611	-0.598854	-0.733217	0.407799
YAL019W	FUN30	U	0.385275	-0.699937	0.601411	1.13263	0.977648	1.00084
YBR021W	FUR4	D	1.51316	-2.77855	-0.266735	-0.862452	-0.592073	-0.871427
YBR021W	FUR4	U	-0.95771	-1.67388	-1.39406	-1.12029	-0.94859	-1.24379
YCL027W	FUS1	D	0.0878038	-0.204741	-0.365462	-0.0558024	0.0877382	1.29077
YMR232W	FUS2	D	0.442535	2.10202	1.2024	0.621978	0.286129	0.256822
YMR232W	FUS2	D	0.430664	1.21904	1.08557	-0.168772	-0.143112	0.6698
YMR232W	FUS2	U	-1.15324	-0.746894	-0.0576592	-0.191886	0.359482	-0.736097
YBL016W	FUS3	D	0.675732	2.85587	0.713203	0.745947	0.139974	0.757881
YBL016W	FUS3	U	0.0983707	0.702708	-0.0538393	0.645136	1.00528	-1.44414
YDR024W	FYV1	D	-1.47548	-1.39893	0.513423	0.0798992	0.384344	1.90068
YIL097W	FYV10	D	-0.406707	0.755935	-1.10033	1.38945	0.245866	-0.40965
YIL097W	FYV10	U	-0.37997	1.1102	0.41836	-0.320503	0.539744	-0.113564
YOR183W	FYV12	D			-2.19613	3.27335	0.0823543	-0.104359
YOR183W	FYV12	D	1.41578	-0.9628	-1.39058	2.12686	0.412955	0.546128
YCL058C	FYV5	D	-0.0174518	1.20417	0.27799	-1.31565	-0.769853	-0.726894
YCL058C	FYV5	U	0.840647	0.484375	0.381	0.556182	0.930626	0.7559
YNL133C	FYV6	U	0.547234	-0.132581	-0.168288	1.00903	0.864217	-0.214922
YNL133C	FYV6	D	-1.25362	-0.23107	-2.54968	-0.951859	-1.04432	1.02719
YLR068W	FYV7	D	0.473936	-0.914012	0.490595	-0.963042	-2.41303	-0.146238
YLR068W	FYV7	U	-0.759078	-0.130153	1.5235	-1.38675	0.195052	-0.243466
YGR196C	FYV8	D	-0.40295	0.39487	-0.939224	-0.159157	0.407417	0.394344
YGR196C	FYV8	U	0.985887	1.44707	2.12692	0.207648	-0.987922	0.477185
YGL254W	FZF1	D	0.245225	-1.10744	-0.576748	-0.305437	-0.552853	0.409011
YGL254W	FZF1	U	-0.374458	0.4267	-0.102136	0.427046	-0.482572	0.539207
YLR088W	GAA1	U		4.58782	1.68327	4.03847	2.99765	5.26915
YLR459W	GAB1	D	0.290769	1.17126	-0.465357	0.913448	-0.205697	-2.89398
YLR459W	GAB1	U	0.0894784	1.2463	0.474027	1.19436	-0.362801	-0.698858
YMR250W	GAD1	D	0.175205	0.146472	-0.270168	1.77792	1.14223	-0.185028
YBR020W	GAL1	D	-1.45802	-1.69548	-0.855863	0.578576	0.0532175	0.910408
YBR020W	GAL1	U	0.672368	0.691101	0.527024	0.556006	-0.98424	0.67206
YBR019C	GAL10	D	2.21312	-0.147994	-0.035723	0.348485	-0.894542	-1.28512
YBR019C	GAL10	U	0.676497	0.655447	-0.419002	0.434378	-0.378846	1.96909
YOL051W	GAL11	D	1.15985	1.54464	-0.251536	0.414473	-0.281465	1.16981
YOL051W	GAL11	U	0.913384	-0.694891	2.2201	0.965183	0.726621	-0.434466
YLR081W	GAL2	U	0.181906	0.811738	-0.708782	-0.733381	0.40876	0.95636
YDR009W	GAL3	D	-1.11794	-0.23954	-0.371215	1.65451		-0.745302
YDR009W	GAL3	U	-0.0722122	0.263802	-0.784283	0.184573	0.432079	-0.919769
YPL248C	GAL4	D	0.960432	-0.416348	0.572357	1.1055	0.241151	0.132517
YPL248C	GAL4	U	0.357902	-0.631963	-0.923833	0.185142	0.073569	0.707838
YBR018C	GAL7	U	-0.104593	0.637477	1.49487	0.244167	-0.596117	-0.135998
YML051W	GAL80	U	-0.647176	-0.216082	-0.25904	-0.108396	-1.68804	-0.346002
YER027C	GAL83	D	-0.519066	0.330796	0.577839	-0.547417	-0.567957	0.893702
YER027C	GAL83	U	0.471669	-0.088769	1.32746	-0.438483	-0.48572	-0.543044
YKR039W	GAP1	D	1.24935	0.465969	0.417785	-0.309207	-0.265853	-0.346701
YKR039W	GAP1	U	-0.00719283	0.0916755	-0.101051	-0.850465	0.90558	-0.276406
YMR307W	GAS1	D	0.277704	-0.132232	-0.31221	-0.0805188	-1.12584	-0.172706
YMR307W	GAS1	U	0.352524	-0.156239	-0.421929	0.122756	-0.7981	0.520902
YLR343W	GAS2	D	0.860068	0.34908	0.978012	-1.25392	0.776315	1.15793
YLR343W	GAS2	U	0.236793	0.427435	0.300508	0.699946	-0.482486	0.856308
YOL132W	GAS4	D	-0.192569	0.650266	-0.0604983	0.343563	-1.09887	1.34299
YOL132W	GAS4	U	0.0250259	0.351148	0.377112	-0.000965667	0.439885	-0.516684
YFL021W	GAT1	U	2.13768		1.41373	0.954459	2.30139	1.51828
YFL021W	GAT1	D	-0.685641	-0.159796	-0.408573	0.566538	-0.347678	-0.553268
YMR136W	GAT2	D	0.17311	0.39312	0.944271	0.426357	0.538577	-1.3388
YMR136W	GAT2	U	0.00499198	-0.658083	0.374138	0.0126049	-0.743832	0.653422
YLR013W	GAT3	D	-0.372161	0.743714	-1.06262	0.9883	-0.532952	1.28133
YLR013W	GAT3	U	-0.652317	-1.64914	0.223159	0.200422	-1.5844	-2.50923
YIR013C	GAT4	U	-0.698143	-0.103789	0.885258	0.531816	1.1708	-0.745122
YIR013C	GAT4	D	-0.323078	0.181417	-1.14226	-1.10471	-0.652875	-1.3262
YCL011C	GBP2	U	0.328781	0.507257	-0.424713	1.14551	0.53513	-0.807764
YCL011C	GBP2	D	-1.63635	0.984431	-0.162782	-0.438212	-1.01175	-1.30915
YOR260W	GCD1	D	-0.13961	1.65669	-0.6351	-0.541317	-0.0968091	-0.671114
YOR260W	GCD1	U	0.88745	-0.385984	-0.538386	-0.551106	-1.19002	-0.0168049
YNL062C	GCD10	U	0.740216	-0.210688	-0.940232	-0.163301	-1.612	-2.88211
YNL062C	GCD10	D	1.9661	0.0866986	0.415153	-1.99998	-1.95473	-2.21581
YER025W	GCD11	D	1.71464		0.614438	0.0985231	-1.34362	0.347687
YER025W	GCD11	U	0.940584	0.972123	0.413711	-0.679356	1.02858	-0.175602
YJL125C	GCD14	D	-1.37341	1.30808	-0.577833	-1.07635	0.0975267	-0.165825
YGR083C	GCD2	D	0.574499	0.964518	0.0129717	-0.0211938	0.832182	-1.78341
YGR083C	GCD2	U	0.31678	0.718808	-0.796961	0.181921	-0.210729	0.0362861
YDR211W	GCD6	D	0.279047	-0.571557	-0.24603	-0.025704	-0.987031	-0.299891
YLR291C	GCD7	U	-0.962854	1.86983		0.304218	1.33787	-1.10751
YLR291C	GCD7	D	-0.884971	0.731841	0.700401	0.875939	1.21043	0.100079
YDR283C	GCN2	D	-0.446436	-0.0107379	0.529593	0.264978	-0.417966	-0.686518
YFR009W	GCN20	D	-0.335436		-1.10079		-0.772188	0.869835
YFR009W	GCN20	U	-0.0920995	0.10194	-0.410308	0.086402	0.106136	-0.13625
YKR026C	GCN3	D	-0.119239	-0.459762	0.0427283	0.722728	-0.587765	-1.04289
YKR026C	GCN3	U	0.412876	0.665604	-0.524368	-0.0274978	-0.539227	-0.759978
YEL009C	GCN4	U	0.158157	-1.07975	-0.268068	0.620215	0.251735	0.077652
YPL075W	GCR1	D	-1.3924	-0.644603	0.106797	0.812674	0.381364	-0.558765
YPL075W	GCR1	U	-0.133505	-0.300506	-0.446933	-0.0611458	-0.44597	-1.10241
YNL199C	GCR2	D	-1.273	-0.254374	-0.529646	0.341029	0.524207	0.60812
YNL199C	GCR2	U	0.631335	-0.073116	0.525844	0.153007	0.526785	0.75315
YDL226C	GCS1	D	-1.17382	-1.62112	-0.125064	-0.218383	-3.63956	-2.04158
YDL226C	GCS1	U	-2.1083	-0.287311	-1.52163	-1.46739	-0.00595398	0.698011
YDR019C	GCV1	D	-1.25324	-0.783476	-0.274111	-0.459201	-0.121932	1.96383
YDR019C	GCV1	U	-0.384035	2.28422	-0.188426	0.61932	-1.17317	-0.56667
YMR189W	GCV2	D	1.48899			-0.689237	0.284611	0.693378
YMR189W	GCV2	U	0.615282	0.325406	-1.00431	-0.273145	-1.10331	-0.738563
YOR120W	GCY1	D	-0.502751	1.00861	-0.727655	-0.565628	1.09719	-0.104901
YEL042W	GDA1	U			2.28122	0.549121	1.52268	-0.463805
YPR184W	GDB1	U	0.956754	0.16447	-0.864418	0.0824674	0.582853
YPR184W	GDB1	D	1.34794	-1.7128	1.46278	-0.496463	0.456344	0.901985
YPL110C	GDE1	D	1.3328	0.800151	0.516703	-0.279764	-0.426953	-0.227402
YPL110C	GDE1	U	0.389393	0.488755	0.152698	-0.364784	0.624747	-1.61007
YOR375C	GDH1	D	-0.846261	1.03088	-1.55676	-1.02852	0.36153	-0.239611
YOR375C	GDH1	U	0.141344	-0.771436	0.500102	0.274929	0.669334	-0.551468
YDL215C	GDH2	D	0.108991	0.546358	-1.25201	-0.440055	-0.00609489	0.438039
YDL215C	GDH2	U	-1.10189	-1.28019	-0.874437	-0.577231	0.736037	0.72054
YAL062W	GDH3	U	-0.458053	-0.620135	-0.14521	-0.440059	-0.782295	-0.216749
YER136W	GDI1	D	0.69735	-1.11872	2.42165	0.168295	-0.0023925	0.0379306
YER136W	GDI1	U	0.595205	-0.455227	0.819774	0.841053	-0.19439	0.698231
YOR355W	GDS1	D	-1.87382	0.212692	-0.294502	1.80776	0.211043	-2.79907
YOR355W	GDS1	D	-1.07696	1.29403	-0.4316	1.73885	0.503746	-2.61585
YOR355W	GDS1	U	0.0905252	-0.356644	0.349781	-0.0300446	0.184499	1.03789
YJR031C	GEA1	D	0.922782	-0.000966501	-0.633845	0.454441	-0.0222324	1.10947
YJR031C	GEA1	U	1.06369	0.390396	-0.320675	0.0106448	0.536914	-0.638075
[truncated: 7,507 more rows]
