# Supplementary material for: Genome-wide Fitness Profiles Reveal a Requirement for Autophagy During Yeast Fermentation
Source: G3 (Bethesda). 2011 Oct 1;1(5):353–67. doi: 10.1534/g3.111.000836 (PMC3276155; doi:10.1534/g3.111.000836)
Supplement: Supporting Information [file supp_1.5.353_TableS7.xlsx]

## Sheet: Sheet1
Table S7. Overlap between homozygous and heterozygous deletion mutants with reduced fitness during fermentation
	ORF	Name
Verified	YCR107W	AAD3
Verified	YOR239W	ABP140
Verified	YDL149W	ATG9
Verified	YDR179C	CSN9
Verified	YDR273W	DON1
Verified	YOR092W	ECM3
Verified	YNL127W	FAR11
Verified	YML006C	GIS4
Verified	YLR450W	HMG2
Verified	YOL002C	IZH2
Verified	YDR148C	KGD2
Verified	YOR298C-A	MBF1
Verified	YBR227C	MCX1
Verified	YOR231W	MKK1
Uncharacterized	YGL261C	PAU11
Verified	YNL289W	PCL1
Verified	YLR044C	PDC1
Verified	YDR435C	PPM1
Verified	YBL046W	PSY4
Verified	YCL001W	RER1
Verified	YDR198C	RKM2
Verified	YPR065W	ROX1
Verified	YBL087C	RPL23A
Verified	YNL334C	SNO2
Verified	YDR059C	UBC5
Verified	YDR049W	VMS1
Verified	YLR360W	VPS38
Verified	YOL128C	YGK3
Verified	YMR152W	YIM1
Dubious	YBL083C
Dubious	YER066C-A
Dubious	YOR376W
Uncharacterized	YLR297W
Uncharacterized	YLR456W
Verified	YMR295C
Dubious	YOR263C
Dubious	YER119C-A
Uncharacterized	YKL033W-A
