# Supplementary material for: Genome-wide Fitness Profiles Reveal a Requirement for Autophagy During Yeast Fermentation
Source: G3 (Bethesda). 2011 Oct 1;1(5):353–67. doi: 10.1534/g3.111.000836 (PMC3276155; doi:10.1534/g3.111.000836)
Supplement: Supporting Information [file supp_1.5.353_TableS8.xlsx]

## Sheet: Sheet1
Table S8. Overlap between homozygous and heterozygous deletion mutants with increased fitness during fermentation
	ORF	Name
Verified	YPL202C	AFT2
Verified	YPR128C	ANT1
Verified	YPR192W	AQY1
Verified	YJR121W	ATP2
Verified	YJR001W	AVT1
Verified	YJR078W	BNA2
Verified	YCL064C	CHA1
Verified	YOR356W	CIR2
Verified	YJL006C	CTK2
Verified	YLR128W	DCN1
Verified	YOR173W	DCS2
Verified	YFL021W	GAT1
Verified	YLL060C	GTT2
Verified	YBR098W	MMS4
Verified	YDR205W	MSC2
Verified	YOL116W	MSN1
Verified	YLR315W	NKP2
Verified	YNL056W	OCA2
Verified	YOL032W	OPI10
Verified	YHR179W	OYE2
Verified	YJL023C	PET130
Verified	YDR265W	PEX10
Verified	YBR296C	PHO89
Verified	YOR363C	PIP2
Verified	YLL010C	PSR1
Verified	YGR258C	RAD2
Verified	YJR021C	REC107
Verified	YJL177W	RPL17B
Verified	YBR280C	SAF1
Verified	YJL145W	SFH5
Verified	YMR016C	SOK2
Verified	YJR019C	TES1
Verified	YPL139C	UME1
Verified	YML106W	URA5
Verified	YJL029C	VPS53
Verified	YNL197C	WHI3
Verified	YHR134W	WSS1
Dubious	YIL028W
Dubious	YFL019C
Dubious	YLR434C
Dubious	YLR294C
Dubious	YIL032C
Uncharacterized	YOR238W
Uncharacterized	YLR152C
Dubious	YOL079W
Uncharacterized	YGR117C
Uncharacterized	YLR042C
Dubious	YER087C-A
