# Supplementary material for: Genome-wide Fitness Profiles Reveal a Requirement for Autophagy During Yeast Fermentation
Source: G3 (Bethesda). 2011 Oct 1;1(5):353–67. doi: 10.1534/g3.111.000836 (PMC3276155; doi:10.1534/g3.111.000836)
Supplement: Supporting Information [file supp_1.5.353_TableS9.xlsx]

## Sheet: Sheet1
Table S9. Homozygous deletion mutants with reduced fitness during fermentation in three or more sequential time points
	ORF	Name
Verified	YCR107W	AAD3
Verified	YMR289W	ABZ2
Verified	YLR131C	ACE2
Verified	YML030W	AIM31
Verified	YML022W	APT1
Verified	YCR048W	ARE1
Verified	YJL071W	ARG2
Verified	YHR018C	ARG4
Verified	YGL180W	ATG1
Verified	YLL042C	ATG10
Verified	YBR217W	ATG12
Verified	YPR185W	ATG13
Verified	YMR159C	ATG16
Verified	YFR021W	ATG18
Verified	YNL242W	ATG2
Verified	YPL166W	ATG29
Verified	YNR007C	ATG3
Verified	YPL149W	ATG5
Verified	YHR171W	ATG7
Verified	YBL078C	ATG8
Verified	YDL149W	ATG9
Verified	YGR157W	CHO2
Verified	YDR022C	CIS1
Verified	YKL190W	CNB1
Verified	YAL058W	CNE1
Verified	YOR031W	CRS5
Uncharacterized	YDR371W	CTS2
Verified	YMR264W	CUE1
Verified	YNL314W	DAL82
Verified	YKL149C	DBR1
Verified	YKL213C	DOA1
Verified	YDR273W	DON1
Verified	YMR299C	DYN3
Verified	YHR193C	EGD2
Verified	YJL196C	ELO1
Verified	YCL045C	EMC1
Verified	YOL071W	EMI5
Verified	YLR404W	FLD1
Verified	YHR176W	FMO1
Verified	YBL013W	FMT1
Verified	YLR214W	FRE1
Verified	YDR283C	GCN2
Verified	YKR026C	GCN3
Verified	YKR106W	GEX2
Verified	YDR507C	GIN4
Verified	YML006C	GIS4
Verified	YOL089C	HAL9
Verified	YOR358W	HAP5
Verified	YEL056W	HAT2
Verified	YKR084C	HBS1
Verified	YNL014W	HEF3
Verified	YLR450W	HMG2
Verified	YOR267C	HRK1
Verified	YKL101W	HSL1
Verified	YER039C	HVG1
Verified	YER092W	IES5
Verified	YDR123C	INO2
Verified	YJL051W	IRC8
Verified	YOL002C	IZH2
Verified	YDR483W	KRE2
Verified	YCL034W	LSB5
Verified	YIL094C	LYS12
Verified	YGL154C	LYS5
Verified	YDR005C	MAF1
Verified	YEL053C	MAK10
Verified	YOR298C-A	MBF1
Verified	YBR227C	MCX1
Verified	YJR137C	MET5
Verified	YIR033W	MGA2
Verified	YOR231W	MKK1
Verified	YKR095W	MLP1
Verified	YGL087C	MMS2
Verified	YHR039C	MSC7
Verified	YDR386W	MUS81
Verified	YBL024W	NCL1
Verified	YOL104C	NDJ1
Verified	YIL038C	NOT3
Verified	YBR025C	OLA1
Verified	YJR073C	OPI3
Dubious	YKR035C	OPI8
Uncharacterized	YGL261C	PAU11
Verified	YNL289W	PCL1
Verified	YLR044C	PDC1
Verified	YPL154C	PEP4
Verified	YGR004W	PEX31
Verified	YOL100W	PKH2
Verified	YOR266W	PNT1
Verified	YJR043C	POL32
Verified	YHR075C	PPE1
Verified	YDR435C	PPM1
Verified	YPL156C	PRM4
Verified	YBL046W	PSY4
Verified	YDR202C	RAV2
Verified	YCL001W	RER1
Verified	YLR073C	RFU1
Verified	YBR275C	RIF1
Verified	YFL033C	RIM15
Verified	YDR198C	RKM2
Verified	YDR255C	RMD5
Verified	YOR018W	ROD1
Verified	YBR229C	ROT2
Verified	YJL148W	RPA34
Verified	YBL087C	RPL23A
Verified	YJR094W-A	RPL43B
Verified	YOR118W	RTC5
Verified	YDR143C	SAN1
Verified	YER047C	SAP1
Verified	YER120W	SCS2
Verified	YGL126W	SCS3
Verified	YLR058C	SHM2
Verified	YNL311C	SKP2
Verified	YNL334C	SNO2
Verified	YJL036W	SNX4
Verified	YLR119W	SRN2
Verified	YDL229W	SSB1
Verified	YIL030C	SSM4
Verified	YMR183C	SSO2
Verified	YLR150W	STM1
Verified	YPL163C	SVS1
Verified	YBR044C	TCM62
Verified	YAL016W	TPD3
Verified	YPR156C	TPO3
Verified	YPL176C	TRE1
Verified	YDR059C	UBC5
Verified	YMR022W	UBC7
Verified	YLL039C	UBI4
Verified	YDL122W	UBP1
Verified	YBL067C	UBP13
Verified	YML013W	UBX2
Verified	YLR168C	UPS2
Uncharacterized	YDR520C	URC2
Verified	YJR049C	UTR1
Verified	YNL054W	VAC7
Verified	YLR410W	VIP1
Verified	YDR049W	VMS1
Verified	YPL120W	VPS30
Verified	YOR069W	VPS5
Verified	YML076C	WAR1
Verified	YKL065C	YET1
Verified	YDL072C	YET3
Verified	YOL128C	YGK3
Verified	YMR152W	YIM1
Verified	YGR281W	YOR1
Verified	YOR291W	YPK9
Verified	YDR285W	ZIP1
Verified	YGL255W	ZRT1
Dubious	YBL083C
Dubious	YOR366W
Uncharacterized	YLR422W
Dubious	YER066C-A
Uncharacterized	YNL217W
Dubious	YDR442W
Dubious	YOR300W
Uncharacterized	YBR056W
Uncharacterized	YLR297W
Dubious	YGL149W
Dubious	YMR158W-B
Uncharacterized	YOR021C
Uncharacterized	YHR162W
Dubious	YGL042C
Dubious	YER084W
Dubious	YJL175W
Uncharacterized	YLR456W
Verified	YMR295C
Verified	YDR186C
Dubious	YMR135W-A
Dubious	YOR263C
Dubious	YDR048C
Uncharacterized	YBL059W
Uncharacterized	YLL007C
Dubious	YLR252W
Dubious	YER119C-A
Dubious	YGR064W
Dubious	YDR426C
Dubious	YDL023C
Uncharacterized	YIL077C
Dubious	YNR005C
Dubious	YFL013W-A
Dubious	YMR254C
Dubious	YGR228W
