# Supplementary material for: Genome-wide Fitness Profiles Reveal a Requirement for Autophagy During Yeast Fermentation
Source: G3 (Bethesda). 2011 Oct 1;1(5):353–67. doi: 10.1534/g3.111.000836 (PMC3276155; doi:10.1534/g3.111.000836)
Supplement: Supporting Information [file supp_1.5.353_TableS10.xlsx]

## Sheet: Sheet1
Table S10. Homozygous deletion mutants with increased fitness during fermentation in three or more sequential time points
	ORF	Name
Verified	YPL202C	AFT2
Verified	YLR089C	ALT1
Verified	YJL084C	ALY2
Verified	YPR128C	ANT1
Verified	YBR286W	APE3
Verified	YPR192W	AQY1
Verified	YNR019W	ARE2
Verified	YPR200C	ARR2
Verified	YDL088C	ASM4
Verified	YJR121W	ATP2
Verified	YJR001W	AVT1
Verified	YIL015W	BAR1
Verified	YER177W	BMH1
Verified	YEL029C	BUD16
Verified	YMR275C	BUL1
Verified	YML111W	BUL2
Verified	YML102W	CAC2
Verified	YOR276W	CAF20
Verified	YLR110C	CCW12
Verified	YAL040C	CLN3
Verified	YML110C	COQ5
Verified	YDL142C	CRD1
Verified	YPL064C	CWC27
Verified	YIR023W	DAL81
Verified	YLR128W	DCN1
Uncharacterized	YKL121W	DGR2
Verified	YHR011W	DIA4
Verified	YBR278W	DPB3
Verified	YKL160W	ELF1
Verified	YLR246W	ERF2
Verified	YFR041C	ERJ5
Verified	YCR034W	FEN1
Verified	YCL058C	FYV5
Verified	YLR343W	GAS2
Verified	YOL030W	GAS5
Verified	YFL021W	GAT1
Verified	YOR120W	GCY1
Verified	YHR104W	GRE3
Verified	YJR090C	GRR1
Verified	YLL060C	GTT2
Verified	YLR289W	GUF1
Verified	YMR192W	GYL1
Verified	YMR011W	HXT2
Verified	YBR157C	ICS2
Verified	YOR189W	IES4
Dubious	YLR331C	JIP3
Verified	YDR378C	LSM6
Verified	YJR024C	MDE1
Verified	YLR288C	MEC3
Verified	YPR167C	MET16
Verified	YPL098C	MGR2
Verified	YGL035C	MIG1
Verified	YJR077C	MIR1
Verified	YPL224C	MMT2
Verified	YJL186W	MNN5
Verified	YOL088C	MPD2
Verified	YNR024W	MPP6
Verified	YDR205W	MSC2
Verified	YBR255W	MTC4
Verified	YHR151C	MTC6
Verified	YDR493W	MZM1
Verified	YMR080C	NAM7
Verified	YLR315W	NKP2
Verified	YGR010W	NMA2
Verified	YNL183C	NPR1
Verified	YNL056W	OCA2
Verified	YHL020C	OPI1
Verified	YDL173W	PAR32
Verified	YIL050W	PCL7
Verified	YGL248W	PDE1
Verified	YOR153W	PDR5
Verified	YJR034W	PET191
Verified	YDR265W	PEX10
Verified	YNL214W	PEX17
Verified	YML123C	PHO84
Verified	YBR296C	PHO89
Verified	YBL022C	PIM1
Verified	YCR024C-A	PMP1
Verified	YOR266W	PNT1
Verified	YBR276C	PPS1
Verified	YIL095W	PRK1
Verified	YJL108C	PRM10
Verified	YML047C	PRM6
Verified	YOL054W	PSH1
Verified	YLL010C	PSR1
Verified	YLR204W	QRI5
Verified	YCR066W	RAD18
Verified	YGR258C	RAD2
Verified	YPL246C	RBD2
Verified	YOR107W	RGS2
Verified	YCR027C	RHB1
Verified	YOR275C	RIM20
Verified	YDR279W	RNH202
Verified	YJR063W	RPA12
Verified	YMR121C	RPL15B
Verified	YNL069C	RPL16B
Verified	YLR344W	RPL26A
Verified	YFR031C-A	RPL2A
Verified	YDL020C	RPN4
Verified	YOL039W	RPP2A
Verified	YOR216C	RUD3
Verified	YBR280C	SAF1
Verified	YMR263W	SAP30
Verified	YER019C-A	SBH2
Verified	YHR207C	SET5
Verified	YJL145W	SFH5
Verified	YPR198W	SGE1
Verified	YJR134C	SGM1
Verified	YMR175W	SIP18
Verified	YDL052C	SLC1
Verified	YPR054W	SMK1
Verified	YIL016W	SNL1
Verified	YMR016C	SOK2
Verified	YML055W	SPC2
Verified	YMR191W	SPG5
Verified	YNL204C	SPS18
Verified	YPR032W	SRO7
Verified	YDR346C	SVF1
Verified	YPR095C	SYT1
Verified	YML072C	TCB3
Verified	YDL080C	THI3
Verified	YPL214C	THI6
Verified	YLR327C	TMA10
Verified	YBR006W	UGA2
Verified	YPL139C	UME1
Verified	YML021C	UNG1
Verified	YBR127C	VMA2
Verified	YJL029C	VPS53
Verified	YNL197C	WHI3
Verified	YHR134W	WSS1
Verified	YFL010C	WWM1
Verified	YHR135C	YCK1
Dubious	YOR072W
Dubious	YHL037C
Dubious	YPR126C
Dubious	YJL211C
Dubious	YAL056C-A
Dubious	YDR008C
Dubious	YFL019C
Dubious	YLR434C
Dubious	YIL032C
Uncharacterized	YOR238W
Uncharacterized	YOR097C
Uncharacterized	YLR152C
Uncharacterized	YJL163C
Dubious	YOR170W
Dubious	YJL022W
Dubious	YOL079W
Dubious	YCR085W
Dubious	YCL022C
Uncharacterized	YIL055C
Dubious	YBR292C
Uncharacterized	YOR186W
Uncharacterized	YPL077C
Dubious	YDR269C
Dubious	YDL094C
Dubious	YBR300C
Uncharacterized	YNL115C
Dubious	YLR111W
Uncharacterized	YGR071C
Dubious	YER087C-A
Dubious	YNL203C
