# Supplementary material for: Genome-wide Fitness Profiles Reveal a Requirement for Autophagy During Yeast Fermentation
Source: G3 (Bethesda). 2011 Oct 1;1(5):353–67. doi: 10.1534/g3.111.000836 (PMC3276155; doi:10.1534/g3.111.000836)
Supplement: Supporting Information [file supp_1.5.353_TableS11.xlsx]

## Sheet: Sheet1
Table S11. Heterozygous deletion mutants with reduced fitness during fermentation in three or more sequential time points
	ORF	Name
Verified	YBR085W	AAC3
Verified	YNL331C	AAD14
Verified	YOR239W	ABP140
Verified	YJR105W	ADO1
Verified	YER017C	AFG3
Verified	YNL100W	AIM37
Verified	YMR092C	AIP1
Verified	YNL148C	ALF1
Verified	YBR110W	ALG1
Verified	YNL094W	APP1
Verified	YML099C	ARG81
Verified	YNL223W	ATG4
Verified	YDL149W	ATG9
Verified	YBL099W	ATP1
Verified	YDL004W	ATP16
Verified	YGR224W	AZR1
Verified	YER155C	BEM2
Verified	YHR101C	BIG1
Verified	YDR428C	BNA7
Verified	YER172C	BRR2
Verified	YPL069C	BTS1
Verified	YJR064W	CCT5
Verified	YDL220C	CDC13
Verified	YDR168W	CDC37
Verified	YMR198W	CIK1
Verified	YGL215W	CLG1
Verified	YOR100C	CRC1
Verified	YPL170W	DAP1
Verified	YPL265W	DIP5
Verified	YDR402C	DIT2
Verified	YDR273W	DON1
Verified	YOR092W	ECM3
Verified	YGL222C	EDC1
Verified	YPL028W	ERG10
Verified	YBR026C	ETR1
Verified	YDR021W	FAL1
Verified	YFR008W	FAR7
Verified	YER056C	FCY2
Verified	YER032W	FIR1
Uncharacterized	YNL168C	FMP41
Verified	YPL262W	FUM1
Verified	YBR021W	FUR4
Verified	YNL062C	GCD10
Verified	YML006C	GIS4
Verified	YOR168W	GLN4
Verified	YDR508C	GNP1
Verified	YPL189W	GUP2
Verified	YLR450W	HMG2
Verified	YOL013C	HRD1
Verified	YJL146W	IDS2
Verified	YOL002C	IZH2
Verified	YDR475C	JIP4
Verified	YPL263C	KEL3
Verified	YDR148C	KGD2
Verified	YDR122W	KIN1
Verified	YNL308C	KRI1
Verified	YCL005W	LDB16
Verified	YBR204C	LDH1
Verified	YHR156C	LIN1
Verified	YKL143W	LTV1
Verified	YCR019W	MAK32
Verified	YBR298C	MAL31
Verified	YBL091C	MAP2
Dubious	YJL199C	MBB1
Verified	YOR298C-A	MBF1
Verified	YDL003W	MCD1
Verified	YPL121C	MEI5
Verified	YNL210W	MER1
Verified	YNL277W	MET2
Verified	YOL026C	MIM1
Verified	YPL050C	MNN9
Verified	YHR091C	MSR1
Verified	YGL236C	MTO1
Verified	YDR162C	NBP2
Verified	YHR124W	NDT80
Verified	YDR176W	NGG1
Verified	YBR089C-A	NHP6B
Verified	YIL164C	NIT1
Verified	YKR022C	NTR2
Uncharacterized	YGL261C	PAU11
Verified	YNL289W	PCL1
Verified	YIL050W	PCL7
Verified	YGL248W	PDE1
Verified	YDR323C	PEP7
Verified	YHR185C	PFS1
Verified	YJL097W	PHS1
Verified	YNL082W	PMS1
Verified	YNR052C	POP2
Verified	YPR103W	PRE2
Verified	YBL041W	PRE7
Verified	YDR300C	PRO1
Verified	YBL046W	PSY4
Verified	YOR157C	PUP1
Verified	YDR030C	RAD28
Verified	YNL216W	RAP1
Verified	YOL010W	RCL1
Verified	YDR028C	REG1
Verified	YDR198C	RKM2
Verified	YDR091C	RLI1
Verified	YLR009W	RLP24
Verified	YKL006W	RPL14A
Verified	YBL087C	RPL23A
Verified	YLR344W	RPL26A
Verified	YBL092W	RPL32
Verified	YDL147W	RPN5
Verified	YDR382W	RPP2B
Verified	YDR394W	RPT3
Verified	YDR280W	RRP45
Verified	YOR049C	RSB1
Verified	YPL183W-A	RTC6
Verified	YGR275W	RTT102
Verified	YDR388W	RVS167
Verified	YDL076C	RXT3
Verified	YBL052C	SAS3
Verified	YHR103W	SBE22
Verified	YBL104C	SEA4
Verified	YDR170C	SEC7
Verified	YOR140W	SFL1
Verified	YKL130C	SHE2
Verified	YNL257C	SIP3
Verified	YNL007C	SIS1
Verified	YDR409W	SIZ1
Verified	YMR216C	SKY1
Verified	YBR156C	SLI15
Verified	YBR077C	SLM4
Verified	YER116C	SLX8
Verified	YOR159C	SME1
Verified	YBR289W	SNF5
Verified	YNL334C	SNO2
Verified	YDL098C	SNU23
Verified	YBR081C	SPT7
Verified	YNL224C	SQS1
Verified	YGL097W	SRM1
Verified	YNL222W	SSU72
Verified	YIR011C	STS1
Verified	YDR346C	SVF1
Verified	YDR334W	SWR1
Verified	YNL187W	SWT21
Verified	YIL039W	TED1
Verified	YGR005C	TFG2
Verified	YKL140W	TGL1
Verified	YDR429C	TIF35
Verified	YER007C-A	TMA20
Verified	YNL273W	TOF1
Verified	YGR082W	TOM20
Verified	YBR126C	TPS1
Verified	YBR061C	TRM7
Verified	YDR354W	TRP4
Verified	YDR246W	TRS23
Verified	YBR265W	TSC10
Verified	YOL022C	TSR4
Verified	YOR251C	TUM1
Verified	YBR166C	TYR1
Verified	YDL210W	UGA4
Verified	YBR173C	UMP1
Verified	YEL040W	UTR2
Verified	YDR049W	VMS1
Verified	YDR325W	YCG1
Verified	YEL006W	YEA6
Verified	YOL128C	YGK3
Verified	YMR152W	YIM1
Verified	YGR172C	YIP1
Verified	YDR057W	YOS9
Uncharacterized	YDR210W
Dubious	YOL046C
Dubious	YBL083C
Uncharacterized	YEL023C
Uncharacterized	YBL010C
Uncharacterized	YJR015W
Uncharacterized	YHL042W
Uncharacterized	YGL138C
Dubious	YGR073C
Dubious	YJL009W
Dubious	YOR376W
Uncharacterized	YFR045W
Verified	YOR302W
Uncharacterized	YLR297W
Dubious	YOL035C
Uncharacterized	YPL014W
Dubious	YPL114W
Uncharacterized	YOR097C
Uncharacterized	YDR179W-A
Dubious	YKL147C
Uncharacterized	YKL077W
Uncharacterized	YBR063C
Dubious	YAL042C-A
Verified	YMR210W
Uncharacterized	YLR456W
Uncharacterized	YJL132W
Verified	YMR295C
Dubious	YDL221W
Dubious	YDR327W
Dubious	YJL182C
Uncharacterized	YJL185C
Dubious	YOR041C
Uncharacterized	YHL008C
Dubious	YBR224W
Dubious	YDL011C
Dubious	YOR263C
Uncharacterized	YFR006W
Uncharacterized	YKL023W
Dubious	YGL102C
Dubious	YKL177W
Uncharacterized	YOL024W
Verified	YBR238C
Verified	YFR016C
Verified	YPL225W
Uncharacterized	YDR348C
Uncharacterized	YKL033W-A
Uncharacterized	YDL180W
