# Supplementary material for: Genome-wide Fitness Profiles Reveal a Requirement for Autophagy During Yeast Fermentation
Source: G3 (Bethesda). 2011 Oct 1;1(5):353–67. doi: 10.1534/g3.111.000836 (PMC3276155; doi:10.1534/g3.111.000836)
Supplement: Supporting Information [file supp_1.5.353_TableS12.xlsx]

## Sheet: Sheet1
Table S12. Heterozygous deletion mutants with increased fitness during fermentation in three or more sequential time points
	ORF	Name
Verified	YBR236C	ABD1
Verified	YPL202C	AFT2
Verified	YIL087C	AIM19
Verified	YKR074W	AIM29
Verified	YKL157W	APE2
Verified	YPR192W	AQY1
Verified	YHL047C	ARN2
Verified	YOR141C	ARP8
Verified	YPR026W	ATH1
Verified	YNL315C	ATP11
Verified	YDR299W	BFR2
Verified	YJR025C	BNA1
Verified	YOR078W	BUD21
Verified	YIL083C	CAB2
Verified	YJL014W	CCT3
Verified	YJL008C	CCT8
Verified	YLR215C	CDC123
Verified	YPL160W	CDC60
Verified	YCL064C	CHA1
Verified	YDR022C	CIS1
Verified	YLR133W	CKI1
Verified	YER157W	COG3
Verified	YNL041C	COG6
Verified	YJR032W	CPR7
Verified	YGR189C	CRH1
Verified	YMR078C	CTF18
Verified	YJL006C	CTK2
Verified	YDR052C	DBF4
Verified	YLR128W	DCN1
Verified	YOR173W	DCS2
Verified	YEL015W	EDC3
Verified	YJR125C	ENT3
Verified	YBR040W	FIG1
Verified	YNL068C	FKH2
Verified	YAR050W	FLO1
Uncharacterized	YPL222W	FMP40
Verified	YER145C	FTR1
Verified	YLR088W	GAA1
Verified	YCR098C	GIT1
Verified	YJR013W	GPI14
Verified	YMR032W	HOF1
Verified	YMR172W	HOT1
Verified	YBL003C	HTA2
Verified	YPL250C	ICY2
Verified	YNL215W	IES2
Verified	YLR052W	IES3
Verified	YJR016C	ILV3
Verified	YJR094C	IME1
Verified	YDR287W	INM2
Uncharacterized	YFR055W	IRC7
Verified	YNL265C	IST1
Verified	YJR119C	JHD2
Verified	YNL188W	KAR1
Verified	YIL027C	KRE27
Verified	YLR260W	LCB5
Verified	YER112W	LSM4
Verified	YGR121C	MEP1
Verified	YJR137C	MET5
Verified	YNL145W	MFA2
Verified	YGR249W	MGA1
Verified	YJL042W	MHP1
Verified	YLL062C	MHT1
Verified	YIR002C	MPH1
Verified	YDR116C	MRPL1
Verified	YNL284C	MRPL10
Verified	YBL038W	MRPL16
Verified	YGR028W	MSP1
Verified	YDL107W	MSS2
Verified	YML031W	NDC1
Verified	YIL048W	NEO1
Verified	YLR195C	NMT1
Verified	YNR053C	NOG2
Verified	YCR026C	NPP1
Verified	YEL062W	NPR2
Verified	YHL023C	NPR3
Verified	YKR082W	NUP133
Verified	YNL056W	OCA2
Verified	YHR179W	OYE2
Verified	YNL015W	PBI2
Verified	YGR202C	PCT1
Verified	YGL248W	PDE1
Verified	YGR004W	PEX31
Verified	YER037W	PHM8
Verified	YNL097C	PHO23
Verified	YOR386W	PHR1
Verified	YOR363C	PIP2
Verified	YKL164C	PIR1
Verified	YOL100W	PKH2
Verified	YER013W	PRP22
Verified	YLL010C	PSR1
Verified	YDR496C	PUF6
Verified	YOR347C	PYK2
Verified	YGR258C	RAD2
Verified	YCR036W	RBK1
Verified	YJR021C	REC107
Verified	YBL033C	RIB1
Verified	YDR487C	RIB3
Verified	YIL021W	RPB3
Verified	YEL054C	RPL12A
Verified	YJL177W	RPL17B
Verified	YBR191W	RPL21A
Verified	YFL034C-A	RPL22B
Verified	YGL031C	RPL24A
Verified	YOL127W	RPL25
Verified	YLR344W	RPL26A
Verified	YGR034W	RPL26B
Verified	YIL018W	RPL2B
Verified	YER056C-A	RPL34A
Verified	YLR448W	RPL6B
Verified	YDR427W	RPN9
Verified	YOR116C	RPO31
Verified	YDL130W	RPP1B
Verified	YGR214W	RPS0A
Verified	YOR369C	RPS12
Verified	YMR143W	RPS16A
Verified	YNL302C	RPS19B
Verified	YPR132W	RPS23B
Verified	YER131W	RPS26B
Verified	YDL061C	RPS29B
Verified	YJR145C	RPS4A
Verified	YJR123W	RPS5
Verified	YPR143W	RRP15
Verified	YPR137W	RRP9
Verified	YLR221C	RSA3
Verified	YDR041W	RSM10
Verified	YBR280C	SAF1
Verified	YBR080C	SEC18
Verified	YJL145W	SFH5
Verified	YKR043C	SHB17
Verified	YHL006C	SHU1
Verified	YOL004W	SIN3
Verified	YDR073W	SNF11
Verified	YDR425W	SNX41
Verified	YMR016C	SOK2
Verified	YNL126W	SPC98
Verified	YPL138C	SPP1
Verified	YNL224C	SQS1
Verified	YKL122C	SRP21
Verified	YHR184W	SSP1
Verified	YDR086C	SSS1
Verified	YJL156C	SSY5
Verified	YDR410C	STE14
Verified	YFL026W	STE2
Verified	YMR125W	STO1
Verified	YIL162W	SUC2
Verified	YJR007W	SUI2
Verified	YDR260C	SWM1
Verified	YDR334W	SWR1
Verified	YPL105C	SYH1
Verified	YPL128C	TBF1
Verified	YOR086C	TCB1
Verified	YDR311W	TFB1
Verified	YDR362C	TFC6
Verified	YPL007C	TFC8
Verified	YMR313C	TGL3
Verified	YOL055C	THI20
Verified	YIL144W	TID3
Verified	YJL143W	TIM17
Verified	YHR070W	TRM5
Verified	YCR083W	TRX3
Verified	YJL197W	UBP12
Verified	YGR019W	UGA1
Verified	YPL139C	UME1
Verified	YJL069C	UTP18
Verified	YJL029C	VPS53
Verified	YJR067C	YAE1
Verified	YCR004C	YCP4
Verified	YEL004W	YEA4
Verified	YHR029C	YHI9
Verified	YMR241W	YHM2
Verified	YFR003C	YPI1
Verified	YBR054W	YRO2
Verified	YBR148W	YSW1
Uncharacterized	YBR184W
Uncharacterized	YDL118W
Uncharacterized	YNR021W
Uncharacterized	YLR352W
Dubious	YLR198C
Dubious	YLR282C
Uncharacterized	YLR283W
Dubious	YBR190W
Dubious	YIL028W
Uncharacterized	YLR072W
Dubious	YFL019C
Dubious	YLR434C
Verified	YOR302W
Dubious	YLR366W
Dubious	YLR294C
Dubious	YJL015C
Dubious	YPL044C
Dubious	YPR077C
Uncharacterized	YLR152C
Uncharacterized	YOR021C
Uncharacterized	YNL092W
Uncharacterized	YJL027C
Dubious	YAL034C-B
Dubious	YOL079W
Dubious	YFL032W
Uncharacterized	YGR117C
Dubious	YML009W-B
Verified	YMR074C
Dubious	YPL136W
Dubious	YGR050C
Dubious	YDR187C
Uncharacterized	YHR035W
Uncharacterized	YOL019W
Uncharacterized	YMR090W
Dubious	YNL114C
Dubious	YIL086C
Dubious	YIL141W
Dubious	YBL065W
Uncharacterized	YLR042C
Dubious	YPL080C
Dubious	YER087C-A
