# Supplementary material for: Genome-wide Fitness Profiles Reveal a Requirement for Autophagy During Yeast Fermentation
Source: G3 (Bethesda). 2011 Oct 1;1(5):353–67. doi: 10.1534/g3.111.000836 (PMC3276155; doi:10.1534/g3.111.000836)
Supplement: Supporting Information [file supp_1.5.353_TableS13.xlsx]

## Sheet: Sheet1
Table S13. Overlap between homozygous and heterozygous deletion mutants with reduced fitness during fermentation in three or more sequential time points
	ORF	Name
Verified	YDL149W	ATG9
Verified	YDR273W	DON1
Verified	YML006C	GIS4
Verified	YLR450W	HMG2
Verified	YOL002C	IZH2
Verified	YOR298C-A	MBF1
Uncharacterized	YGL261C	PAU11
Verified	YNL289W	PCL1
Verified	YBL046W	PSY4
Verified	YDR198C	RKM2
Verified	YBL087C	RPL23A
Verified	YNL334C	SNO2
Verified	YDR049W	VMS1
Verified	YOL128C	YGK3
Verified	YMR152W	YIM1
Dubious	YBL083C
Uncharacterized	YLR297W
Uncharacterized	YLR456W
Verified	YMR295C
Dubious	YOR263C
