# Supplementary material for: Genome-wide Fitness Profiles Reveal a Requirement for Autophagy During Yeast Fermentation
Source: G3 (Bethesda). 2011 Oct 1;1(5):353–67. doi: 10.1534/g3.111.000836 (PMC3276155; doi:10.1534/g3.111.000836)
Supplement: Supporting Information [file supp_1.5.353_TableS14.xlsx]

## Sheet: Sheet1
Table S14. Overlap between homozygous and heterozygous deletion mutants with increased fitness during fermentation in three or more sequential time points
	ORF	Name
Verified	YPL202C	AFT2
Verified	YPR192W	AQY1
Verified	YLR128W	DCN1
Verified	YNL056W	OCA2
Verified	YGL248W	PDE1
Verified	YLL010C	PSR1
Verified	YGR258C	RAD2
Verified	YLR344W	RPL26A
Verified	YBR280C	SAF1
Verified	YJL145W	SFH5
Verified	YMR016C	SOK2
Verified	YPL139C	UME1
Verified	YJL029C	VPS53
Dubious	YFL019C
Dubious	YLR434C
Uncharacterized	YLR152C
Dubious	YOL079W
Dubious	YER087C-A
